# Supplementary material
Source: publisher figshare collection journal article supplement (https://acs.figshare.com/ndownloader/files/3879229)
Supplement: Supplementary file 1 [file 3879229]

 
data_shelx
 
_audit_creation_method            SHELXL-2014/6
_chemical_name_systematic         ?
_chemical_name_common             ?
_chemical_melting_point           ?
_chemical_formula_moiety          ?
_chemical_formula_sum
 'F0.40 Fe3 H13.60 Na O24 P8' 
_chemical_formula_weight          843.61

_publ_contact_author_name       'Philip Lightfoot'
_publ_contact_author_address
;
School of Chemistry
North Haugh
University of St Andrews
KY16 9ST 
;

_publ_contact_author_phone      '01334463841'
_publ_contact_author_fax        ?
_publ_contact_author_email      'pl@st-andrews.ac.uk'

_publ_requested_journal         'Inorganic Chemistry'

loop_
 _atom_type_symbol
 _atom_type_description
 _atom_type_scat_dispersion_real
 _atom_type_scat_dispersion_imag
 _atom_type_scat_source
 'Na'  'Na'   0.0362   0.0249
 'International Tables Vol C Tables 4.2.6.8 and 6.1.1.4'
 'Fe'  'Fe'   0.3463   0.8444
 'International Tables Vol C Tables 4.2.6.8 and 6.1.1.4'
 'O'  'O'   0.0106   0.0060
 'International Tables Vol C Tables 4.2.6.8 and 6.1.1.4'
 'P'  'P'   0.1023   0.0942
 'International Tables Vol C Tables 4.2.6.8 and 6.1.1.4'
 'H'  'H'   0.0000   0.0000
 'International Tables Vol C Tables 4.2.6.8 and 6.1.1.4'
 'F'  'F'   0.0171   0.0103
 'International Tables Vol C Tables 4.2.6.8 and 6.1.1.4'
 
_space_group_crystal_system       triclinic
_space_group_IT_number            2
_space_group_name_H-M_alt         'P -1'
_space_group_name_Hall            '-P 1'
 
_shelx_space_group_comment
;
The symmetry employed for this shelxl refinement is uniquely defined
by the following loop, which should always be used as a source of
symmetry information in preference to the above space-group names.
They are only intended as comments.
;
 
loop_
 _space_group_symop_operation_xyz
 'x, y, z'
 '-x, -y, -z'
 
_cell_length_a                    7.5302(4)
_cell_length_b                    9.1696(3)
_cell_length_c                    9.4732(11)
_cell_angle_alpha                 118.063(5)
_cell_angle_beta                  101.274(12)
_cell_angle_gamma                 101.192(12)
_cell_volume                      534.25(8)
_cell_formula_units_Z             1
_cell_measurement_temperature     173(2) 
_cell_measurement_reflns_used     2070
_cell_measurement_theta_min       2.6
_cell_measurement_theta_max       25.3
 
_exptl_crystal_description       'Prism'
_exptl_crystal_colour            'Colorless'
_exptl_crystal_density_meas       ?
_exptl_crystal_density_method     ?
_exptl_crystal_density_diffrn     2.622          
_exptl_crystal_F_000              418
_exptl_transmission_factor_min    ?
_exptl_transmission_factor_max    ?
_exptl_crystal_size_max           0.18
_exptl_crystal_size_mid           0.18
_exptl_crystal_size_min           0.12
_exptl_absorpt_coefficient_mu     2.747
_shelx_estimated_absorpt_T_min    ?
_shelx_estimated_absorpt_T_max    ?
_exptl_absorpt_correction_type    'Multi-scan'
_exptl_absorpt_correction_T_min   0.724
_exptl_absorpt_correction_T_max   1.000
_exptl_absorpt_process_details    'REQAB (Rigaku, 1998)'
_exptl_absorpt_special_details    ?
_diffrn_ambient_temperature       173(2)
_diffrn_radiation_wavelength      0.71075
_diffrn_radiation_type            MoK\a
_diffrn_source                    'Rotating Anode'
_diffrn_measurement_device_type   'Rigaku Pilatus 200K'
_diffrn_measurement_method        'profile data from \w-scans'
_diffrn_detector_area_resol_mean  11.6279
_diffrn_reflns_number             8805
_diffrn_reflns_av_unetI/netI      0.0418
_diffrn_reflns_av_R_equivalents   0.0594
_diffrn_reflns_limit_h_min        -9
_diffrn_reflns_limit_h_max        9
_diffrn_reflns_limit_k_min        -11
_diffrn_reflns_limit_k_max        11
_diffrn_reflns_limit_l_min        -11
_diffrn_reflns_limit_l_max        11
_diffrn_reflns_theta_min          2.550
_diffrn_reflns_theta_max          25.379
_diffrn_reflns_theta_full         25.000
_diffrn_measured_fraction_theta_max   0.992
_diffrn_measured_fraction_theta_full  0.995
_diffrn_reflns_Laue_measured_fraction_max    0.992
_diffrn_reflns_Laue_measured_fraction_full   0.995
_diffrn_reflns_point_group_measured_fraction_max   0.992
_diffrn_reflns_point_group_measured_fraction_full  0.995
_reflns_number_total              1950
_reflns_number_gt                 1798
_reflns_threshold_expression      'I > 2\s(I)'
_reflns_Friedel_coverage          0.000
_reflns_Friedel_fraction_max      .
_reflns_Friedel_fraction_full     .
 
_reflns_special_details
;
 Reflections were merged by SHELXL according to the crystal
 class for the calculation of statistics and refinement.
 
 _reflns_Friedel_fraction is defined as the number of unique
 Friedel pairs measured divided by the number that would be
 possible theoretically, ignoring centric projections and
 systematic absences.
;
 
_computing_data_collection        'CrystalClear-SM Expert 2.1 b28 (Rigaku, 2013)'
_computing_cell_refinement        'CrystalClear-SM Expert 2.1 b28 (Rigaku, 2013)'
_computing_data_reduction         'CrystalClear-SM Expert 2.1 b28 (Rigaku, 2013)'
_computing_structure_solution     ?
_computing_structure_refinement 'SHELXL-2014/6 (Sheldrick, 2014)'
_computing_molecular_graphics     ?
_computing_publication_material   ?
_refine_special_details           
;
Penultimate refinement showed significantly
enhanced electron density at two of the P-H sites, which suggested that these 
sites incorporated partial F occupancy. For simplicity these sites were refined 
as partially occupied F sites, with no H occupancy: this explains the discrepancy 
in total H content.
;
_refine_ls_structure_factor_coef  Fsqd
_refine_ls_matrix_type            full
_refine_ls_weighting_scheme       calc
_refine_ls_weighting_details
'w=1/[\s^2^(Fo^2^)+(0.1000P)^2^] where P=(Fo^2^+2Fc^2^)/3'
_atom_sites_solution_primary      ?
_atom_sites_solution_secondary    ?
_atom_sites_solution_hydrogens    difmap
_refine_ls_hydrogen_treatment     refxyz
_refine_ls_extinction_method      none
_refine_ls_extinction_coef        .
_refine_ls_number_reflns          1950
_refine_ls_number_parameters      192
_refine_ls_number_restraints      2
_refine_ls_R_factor_all           0.0284
_refine_ls_R_factor_gt            0.0272
_refine_ls_wR_factor_ref          0.0832
_refine_ls_wR_factor_gt           0.0812
_refine_ls_goodness_of_fit_ref    0.654
_refine_ls_restrained_S_all       0.655
_refine_ls_shift/su_max           0.000
_refine_ls_shift/su_mean          0.000
 
loop_
 _atom_site_label
 _atom_site_type_symbol
 _atom_site_fract_x
 _atom_site_fract_y
 _atom_site_fract_z
 _atom_site_U_iso_or_equiv
 _atom_site_adp_type
 _atom_site_occupancy
 _atom_site_site_symmetry_order  
 _atom_site_calc_flag
 _atom_site_refinement_flags_posn
 _atom_site_refinement_flags_adp
 _atom_site_refinement_flags_occupancy
 _atom_site_disorder_assembly
 _atom_site_disorder_group
Fe1 Fe 0.5000 -0.5000 0.0000 0.00914(16) Uani 1 2 d S . P . .
Fe2 Fe 0.03586(5) -0.21092(4) -0.25839(4) 0.00998(15) Uani 1 1 d . . . . .
P1 P 0.17163(9) -0.75765(8) -0.37744(8) 0.01176(18) Uani 1 1 d . . . . .
H4 H 0.011(4) -0.770(4) -0.336(4) 0.014 Uiso 1 1 d . U . . .
P3 P 0.26886(9) 0.19125(8) 0.03742(8) 0.01038(18) Uani 1 1 d . . . . .
H5 H 0.432(4) 0.168(4) 0.084(4) 0.012 Uiso 1 1 d . U . . .
P2 P 0.24561(9) -0.23112(9) 0.07149(8) 0.01263(18) Uani 1 1 d D . . . .
F1 F 0.0725(15) -0.3652(15) 0.0429(17) 0.015 Uiso 0.107(4) 1 d D U . . .
P4 P 0.25292(9) -0.39175(8) -0.51644(8) 0.01249(18) Uani 1 1 d D . . . .
F2 F 0.3859(19) -0.4539(19) -0.4444(19) 0.015 Uiso 0.092(4) 1 d D U . . .
Na1 Na 0.5000 0.0000 0.5000 0.0254(4) Uani 1 2 d S . P . .
O12 O 0.0691(3) -0.5344(2) -0.6460(2) 0.0156(4) Uani 1 1 d . . . . .
O2 O 0.1445(3) -0.7705(2) -0.5445(2) 0.0145(4) Uani 1 1 d . . . . .
O10 O 0.2321(3) -0.2349(2) -0.3747(2) 0.0158(4) Uani 1 1 d . . . . .
O4 O 0.4077(3) -0.2974(2) 0.0985(2) 0.0144(4) Uani 1 1 d . . . . .
O3 O 0.3176(3) -0.5896(2) -0.2278(2) 0.0157(4) Uani 1 1 d . . . . .
O7 O 0.1535(3) 0.0505(2) -0.1488(2) 0.0138(4) Uani 1 1 d . . . . .
O8 O 0.3079(2) 0.3728(2) 0.0614(2) 0.0144(4) Uani 1 1 d . . . . .
O9 O 0.1715(3) 0.1738(2) 0.1575(2) 0.0148(4) Uani 1 1 d . . . . .
O1 O 0.2308(3) -0.9198(2) -0.3979(3) 0.0159(4) Uani 1 1 d . . . . .
O6 O 0.2190(3) -0.1908(2) -0.0646(2) 0.0175(4) Uani 1 1 d . . . . .
O11 O 0.3676(3) -0.3187(3) -0.6050(3) 0.0229(5) Uani 1 1 d . . . . .
O5 O 0.2892(3) -0.0590(3) 0.2469(2) 0.0249(5) Uani 1 1 d . . . . .
H1 H 0.218(5) -0.931(5) -0.324(5) 0.029(10) Uiso 1 1 d . . . . .
H2 H 0.238(5) -0.002(5) 0.232(5) 0.032(11) Uiso 1 1 d . . . . .
H3 H 0.363(5) -0.387(4) -0.687(4) 0.018(9) Uiso 1 1 d . . . . .
 
loop_
 _atom_site_aniso_label
 _atom_site_aniso_U_11
 _atom_site_aniso_U_22
 _atom_site_aniso_U_33
 _atom_site_aniso_U_23
 _atom_site_aniso_U_13
 _atom_site_aniso_U_12
Fe1 0.0090(3) 0.0087(3) 0.0093(3) 0.0037(2) 0.0037(2) 0.0045(2)
Fe2 0.0106(2) 0.0101(2) 0.0093(2) 0.00418(17) 0.00419(16) 0.00517(16)
P1 0.0110(3) 0.0130(3) 0.0107(4) 0.0056(3) 0.0036(3) 0.0046(3)
P3 0.0098(3) 0.0109(3) 0.0112(3) 0.0052(3) 0.0052(3) 0.0050(3)
P2 0.0113(3) 0.0146(4) 0.0138(4) 0.0074(3) 0.0051(3) 0.0071(3)
P4 0.0126(3) 0.0125(3) 0.0140(4) 0.0061(3) 0.0073(3) 0.0069(3)
Na1 0.0234(9) 0.0260(9) 0.0238(9) 0.0120(7) 0.0033(7) 0.0099(7)
O12 0.0170(10) 0.0129(9) 0.0154(9) 0.0058(8) 0.0056(8) 0.0061(7)
O2 0.0152(9) 0.0156(9) 0.0106(9) 0.0058(8) 0.0026(7) 0.0054(7)
O10 0.0150(9) 0.0138(9) 0.0141(9) 0.0029(8) 0.0081(8) 0.0050(7)
O4 0.0174(9) 0.0127(9) 0.0120(9) 0.0043(8) 0.0048(8) 0.0090(8)
O3 0.0183(10) 0.0127(9) 0.0134(9) 0.0063(8) 0.0009(8) 0.0056(8)
O7 0.0159(9) 0.0107(9) 0.0130(9) 0.0048(7) 0.0053(8) 0.0039(7)
O8 0.0141(9) 0.0122(9) 0.0174(10) 0.0070(8) 0.0081(8) 0.0051(7)
O9 0.0166(9) 0.0142(9) 0.0140(9) 0.0058(8) 0.0088(8) 0.0068(7)
O1 0.0215(10) 0.0141(10) 0.0132(10) 0.0081(8) 0.0054(8) 0.0059(8)
O6 0.0185(10) 0.0170(10) 0.0140(9) 0.0068(8) 0.0019(8) 0.0074(8)
O11 0.0239(11) 0.0230(11) 0.0191(11) 0.0069(10) 0.0148(9) 0.0059(9)
O5 0.0368(13) 0.0274(11) 0.0166(11) 0.0098(10) 0.0106(9) 0.0258(11)
 
_geom_special_details
;
 All esds (except the esd in the dihedral angle between two l.s. planes)
 are estimated using the full covariance matrix.  The cell esds are taken
 into account individually in the estimation of esds in distances, angles
 and torsion angles; correlations between esds in cell parameters are only
 used when they are defined by crystal symmetry.  An approximate (isotropic)
 treatment of cell esds is used for estimating esds involving l.s. planes.
;
 
loop_
 _geom_bond_atom_site_label_1
 _geom_bond_atom_site_label_2
 _geom_bond_distance
 _geom_bond_site_symmetry_2
 _geom_bond_publ_flag
Fe1 O4 1.9822(17) 2_645 ?
Fe1 O4 1.9822(17) . ?
Fe1 O3 1.9884(18) 2_645 ?
Fe1 O3 1.9884(18) . ?
Fe1 O8 2.0259(18) 2_655 ?
Fe1 O8 2.0259(18) 1_545 ?
Fe2 O6 1.9744(19) . ?
Fe2 O12 1.9778(18) 2_544 ?
Fe2 O9 1.9883(18) 2 ?
Fe2 O2 1.9948(18) 2_544 ?
Fe2 O10 1.9953(18) . ?
Fe2 O7 2.0210(18) . ?
P1 O2 1.4999(19) . ?
P1 O3 1.5065(19) . ?
P1 O1 1.571(2) . ?
P1 H4 1.34(3) . ?
P3 O9 1.5191(19) . ?
P3 O8 1.5290(19) . ?
P3 O7 1.5350(19) . ?
P3 H5 1.31(3) . ?
P2 F1 1.487(8) . ?
P2 O6 1.488(2) . ?
P2 O4 1.4957(18) . ?
P2 O5 1.574(2) . ?
P2 Na1 3.4538(9) . ?
P4 F2 1.454(9) . ?
P4 O10 1.4994(18) . ?
P4 O12 1.5022(19) . ?
P4 O11 1.576(2) . ?
Na1 O5 2.349(2) . ?
Na1 O5 2.349(2) 2_656 ?
Na1 O1 2.5022(19) 2_645 ?
Na1 O1 2.5022(19) 1_566 ?
Na1 O11 2.504(2) 2_655 ?
Na1 O11 2.504(2) 1_556 ?
Na1 P2 3.4538(9) 2_656 ?
O12 Fe2 1.9778(18) 2_544 ?
O2 Fe2 1.9948(18) 2_544 ?
O8 Fe1 2.0259(18) 1_565 ?
O9 Fe2 1.9883(18) 2 ?
O1 Na1 2.5022(19) 1_544 ?
O1 H1 0.78(4) . ?
O11 Na1 2.504(2) 1_554 ?
O11 H3 0.72(3) . ?
O5 H2 0.75(4) . ?
 
loop_
 _geom_angle_atom_site_label_1
 _geom_angle_atom_site_label_2
 _geom_angle_atom_site_label_3
 _geom_angle
 _geom_angle_site_symmetry_1
 _geom_angle_site_symmetry_3
 _geom_angle_publ_flag
O4 Fe1 O4 180.0 2_645 . ?
O4 Fe1 O3 89.97(7) 2_645 2_645 ?
O4 Fe1 O3 90.03(7) . 2_645 ?
O4 Fe1 O3 90.03(7) 2_645 . ?
O4 Fe1 O3 89.97(7) . . ?
O3 Fe1 O3 180.0 2_645 . ?
O4 Fe1 O8 88.67(7) 2_645 2_655 ?
O4 Fe1 O8 91.33(7) . 2_655 ?
O3 Fe1 O8 93.78(8) 2_645 2_655 ?
O3 Fe1 O8 86.22(8) . 2_655 ?
O4 Fe1 O8 91.33(7) 2_645 1_545 ?
O4 Fe1 O8 88.67(7) . 1_545 ?
O3 Fe1 O8 86.22(8) 2_645 1_545 ?
O3 Fe1 O8 93.78(8) . 1_545 ?
O8 Fe1 O8 180.00(9) 2_655 1_545 ?
O6 Fe2 O12 88.62(8) . 2_544 ?
O6 Fe2 O9 96.51(8) . 2 ?
O12 Fe2 O9 90.23(8) 2_544 2 ?
O6 Fe2 O2 178.80(7) . 2_544 ?
O12 Fe2 O2 91.93(8) 2_544 2_544 ?
O9 Fe2 O2 84.55(8) 2 2_544 ?
O6 Fe2 O10 89.52(8) . . ?
O12 Fe2 O10 93.38(8) 2_544 . ?
O9 Fe2 O10 173.05(8) 2 . ?
O2 Fe2 O10 89.39(8) 2_544 . ?
O6 Fe2 O7 88.03(8) . . ?
O12 Fe2 O7 176.65(7) 2_544 . ?
O9 Fe2 O7 89.99(7) 2 . ?
O2 Fe2 O7 91.42(7) 2_544 . ?
O10 Fe2 O7 86.75(7) . . ?
O2 P1 O3 114.61(11) . . ?
O2 P1 O1 105.89(11) . . ?
O3 P1 O1 110.85(10) . . ?
O2 P1 H4 113.8(12) . . ?
O3 P1 H4 105.0(12) . . ?
O1 P1 H4 106.5(12) . . ?
O9 P3 O8 112.36(10) . . ?
O9 P3 O7 112.07(10) . . ?
O8 P3 O7 109.68(10) . . ?
O9 P3 H5 102.0(12) . . ?
O8 P3 H5 109.8(12) . . ?
O7 P3 H5 110.7(12) . . ?
F1 P2 O6 112.2(5) . . ?
F1 P2 O4 105.0(5) . . ?
O6 P2 O4 116.88(11) . . ?
F1 P2 O5 108.4(5) . . ?
O6 P2 O5 109.20(12) . . ?
O4 P2 O5 104.67(11) . . ?
F1 P2 Na1 106.5(5) . . ?
O6 P2 Na1 135.53(8) . . ?
O4 P2 Na1 71.31(7) . . ?
O5 P2 Na1 35.19(8) . . ?
F2 P4 O10 108.7(6) . . ?
F2 P4 O12 113.2(6) . . ?
O10 P4 O12 115.90(11) . . ?
F2 P4 O11 103.0(6) . . ?
O10 P4 O11 105.39(12) . . ?
O12 P4 O11 109.53(12) . . ?
O5 Na1 O5 180.0 . 2_656 ?
O5 Na1 O1 99.21(7) . 2_645 ?
O5 Na1 O1 80.79(7) 2_656 2_645 ?
O5 Na1 O1 80.79(7) . 1_566 ?
O5 Na1 O1 99.21(7) 2_656 1_566 ?
O1 Na1 O1 180.0 2_645 1_566 ?
O5 Na1 O11 92.11(8) . 2_655 ?
O5 Na1 O11 87.89(8) 2_656 2_655 ?
O1 Na1 O11 95.76(7) 2_645 2_655 ?
O1 Na1 O11 84.24(7) 1_566 2_655 ?
O5 Na1 O11 87.89(8) . 1_556 ?
O5 Na1 O11 92.11(8) 2_656 1_556 ?
O1 Na1 O11 84.24(6) 2_645 1_556 ?
O1 Na1 O11 95.76(7) 1_566 1_556 ?
O11 Na1 O11 180.0 2_655 1_556 ?
O5 Na1 P2 22.72(5) . . ?
O5 Na1 P2 157.28(5) 2_656 . ?
O1 Na1 P2 83.09(5) 2_645 . ?
O1 Na1 P2 96.91(5) 1_566 . ?
O11 Na1 P2 109.64(5) 2_655 . ?
O11 Na1 P2 70.36(6) 1_556 . ?
O5 Na1 P2 157.28(5) . 2_656 ?
O5 Na1 P2 22.72(5) 2_656 2_656 ?
O1 Na1 P2 96.91(5) 2_645 2_656 ?
O1 Na1 P2 83.09(5) 1_566 2_656 ?
O11 Na1 P2 70.36(5) 2_655 2_656 ?
O11 Na1 P2 109.64(6) 1_556 2_656 ?
P2 Na1 P2 180.0 . 2_656 ?
P4 O12 Fe2 134.75(12) . 2_544 ?
P1 O2 Fe2 146.31(12) . 2_544 ?
P4 O10 Fe2 131.54(11) . . ?
P2 O4 Fe1 144.22(11) . . ?
P1 O3 Fe1 139.92(12) . . ?
P3 O7 Fe2 129.33(11) . . ?
P3 O8 Fe1 130.22(11) . 1_565 ?
P3 O9 Fe2 147.63(12) . 2 ?
P1 O1 Na1 124.93(11) . 1_544 ?
P1 O1 H1 108(3) . . ?
Na1 O1 H1 117(3) 1_544 . ?
P2 O6 Fe2 146.65(13) . . ?
P4 O11 Na1 123.87(12) . 1_554 ?
P4 O11 H3 113(3) . . ?
Na1 O11 H3 123(3) 1_554 . ?
P2 O5 Na1 122.10(12) . . ?
P2 O5 H2 108(3) . . ?
Na1 O5 H2 129(3) . . ?
 
_refine_diff_density_max    0.560
_refine_diff_density_min   -0.554
_refine_diff_density_rms    0.113

_shelxl_version_number 2014/6

_shelx_res_file
;
TITL IM110
REM  transformed to space group :
CELL   0.71075  7.5302  9.1696  9.4732  118.063  101.274  101.192
ZERR   1        0.0004  0.0003  0.0011    0.005    0.012    0.012
LATT    1
SFAC Na Fe O  P H  F
UNIT 1  3  24 8  13.6 0.4
acta 50
L.S. 10
BOND $H
FMAP 2
PLAN 10
DFIX 1.48 .01 P2 F1 P4 F2
WGHT    0.100000
FVAR       4.42750
MOLE   1
FE1   2    0.500000   -0.500000    0.000000    10.50000    0.00898    0.00874 =
         0.00935    0.00370    0.00366    0.00449
FE2   2    0.035864   -0.210920   -0.258393    11.00000    0.01055    0.01012 =
         0.00930    0.00418    0.00419    0.00517
P1    4    0.171635   -0.757648   -0.377439    11.00000    0.01105    0.01301 =
         0.01068    0.00564    0.00359    0.00456
H4    5    0.011354   -0.770425   -0.336480    11.00000   -1.20000
P3    4    0.268860    0.191250    0.037420    11.00000    0.00984    0.01088 =
         0.01124    0.00522    0.00521    0.00497
H5    5    0.431554    0.168169    0.084161    11.00000   -1.20000
P2    4    0.245609   -0.231116    0.071488    11.00000    0.01133    0.01461 =
         0.01376    0.00741    0.00511    0.00711
F1    6    0.072495   -0.365206    0.042914     0.10663   -1.20000
P4    4    0.252916   -0.391755   -0.516441    11.00000    0.01264    0.01246 =
         0.01404    0.00614    0.00733    0.00686
F2    6    0.385862   -0.453916   -0.444410     0.09246   -1.20000
NA1   1    0.500000    0.000000    0.500000    10.50000    0.02342    0.02596 =
         0.02376    0.01199    0.00335    0.00992
O12   3    0.069069   -0.534423   -0.646045    11.00000    0.01697    0.01290 =
         0.01539    0.00578    0.00561    0.00614
O2    3    0.144518   -0.770530   -0.544539    11.00000    0.01518    0.01556 =
         0.01063    0.00577    0.00262    0.00540
O10   3    0.232138   -0.234937   -0.374683    11.00000    0.01503    0.01375 =
         0.01414    0.00285    0.00808    0.00497
O4    3    0.407721   -0.297378    0.098543    11.00000    0.01743    0.01270 =
         0.01203    0.00430    0.00485    0.00898
O3    3    0.317588   -0.589621   -0.227817    11.00000    0.01832    0.01270 =
         0.01338    0.00628    0.00089    0.00565
O7    3    0.153475    0.050539   -0.148831    11.00000    0.01590    0.01066 =
         0.01297    0.00480    0.00530    0.00386
O8    3    0.307882    0.372833    0.061442    11.00000    0.01407    0.01224 =
         0.01744    0.00699    0.00810    0.00509
O9    3    0.171547    0.173789    0.157479    11.00000    0.01663    0.01420 =
         0.01403    0.00581    0.00877    0.00683
O1    3    0.230797   -0.919838   -0.397929    11.00000    0.02149    0.01415 =
         0.01318    0.00807    0.00539    0.00587
O6    3    0.218974   -0.190807   -0.064607    11.00000    0.01852    0.01703 =
         0.01398    0.00680    0.00194    0.00744
O11   3    0.367574   -0.318735   -0.604981    11.00000    0.02393    0.02296 =
         0.01910    0.00694    0.01479    0.00592
O5    3    0.289187   -0.058970    0.246916    11.00000    0.03677    0.02745 =
         0.01659    0.00983    0.01056    0.02583
H1    5    0.218267   -0.930674   -0.323606    11.00000    0.02917
H2    5    0.237975   -0.002081    0.231514    11.00000    0.03233
H3    5    0.363097   -0.386654   -0.686764    11.00000    0.01811

MOLE   2
HKLF 4

REM  IM110
REM R1 =  0.0272 for    1798 Fo > 4sig(Fo)  and  0.0284 for all    1950 data
REM    192 parameters refined using      2 restraints

END

WGHT      0.0417      0.0000

REM Highest difference peak  0.560,  deepest hole -0.554,  1-sigma level  0.113
Q1    1   0.1449 -0.7712 -0.4816  11.00000  0.05    0.56
Q2    1   0.3092  0.2976  0.0640  11.00000  0.05    0.55
Q3    1   0.4784 -0.5276 -0.1155  11.00000  0.05    0.51
Q4    1   0.2176  0.1122 -0.0666  11.00000  0.05    0.51
Q5    1   0.2122  0.1623  0.0968  11.00000  0.05    0.50
Q6    1   0.4520 -0.5544  0.0548  11.00000  0.05    0.47
Q7    1   0.0560 -0.1958 -0.1395  11.00000  0.05    0.47
Q8    1   0.1315 -0.0400 -0.1480  11.00000  0.05    0.45
Q9    1   0.1580 -0.2573 -0.0971  11.00000  0.05    0.45
Q10   1  -0.0009 -0.2586 -0.3947  11.00000  0.05    0.44
;
_shelx_res_checksum   18298

_shelx_hkl_file
;
   0   0  -1 7486.35  866.74   1-0.97049-0.90968 0.64368 0.79510 0.97049 1.04838
   0   0   1 5529.87  942.52   1-0.99173-1.05254 0.85333 0.70192 0.99173 0.91384
   0   0   1 6076.43  786.69   1-0.99019-1.05086 0.81472 0.66339-0.13635-0.21415
   0   0  -1 6975.11  945.26   1-0.96594-0.90527 0.59742 0.74875-0.33683-0.25903
   0   0   1 8074.72  953.11   1-0.59050-0.65113 0.51089 0.35947-0.59050-0.66851
   0   0  -1 7023.08 1000.60   1-0.66048-0.59985 0.36651 0.51796-0.66048-0.58247
   0   0   1 6854.70  949.31   1-0.96352-1.02416 0.79272 0.64133-0.17828-0.25608
   0   0  -1 8120.93  908.47   1-0.98400-0.92334 0.61159 0.76288-0.31230-0.23452
   0   0  -251030.99 2283.34   1-0.95168-0.83037 0.52937 0.83238 0.95168 1.10768
   0   0   249409.41 2337.46   1-0.99484-1.11647 0.95244 0.64960 0.99484 0.83907
   0   0  -251543.72 2437.83   1-0.94608-0.82473 0.48320 0.78588-0.43519-0.27959
   0   0   244174.75 2183.72   1-0.55358-0.67484 0.58174 0.27886-0.55358-0.70960
   0   0  -252784.93 2013.36   1-0.69354-0.57228 0.29296 0.59585-0.69354-0.53752
   0   0  -256872.57 2514.57   1-0.99032-0.86900 0.51752 0.82011-0.37877-0.22319
   0   0  -320458.63 1436.68   1-0.92827-0.74631 0.41486 0.86940 0.92827 1.16228
   0   0   321752.26 1538.60   1-0.99282-1.17526 1.04761 0.59337 0.99282 0.75916
   0   0   315990.04 1832.12   1-0.99367-1.17569 1.01701 0.56302 0.06914-0.16425
   0   0  -320193.44 1361.62   1-0.92093-0.73891 0.36515 0.81916-0.53228-0.29888
   0   0   319795.20 1644.96   1-0.51537-0.69725 0.65165 0.19734-0.51537-0.74940
   0   0  -322663.06 1480.12   1-0.72530-0.54341 0.21852 0.67284-0.72530-0.49127
   0   0  -320923.10 1475.88   1-0.99395-0.81197 0.42152 0.87540-0.44455-0.21119
   0   0  -417244.99 1391.37   1-0.89954-0.65691 0.29632 0.90236 0.89954 1.21155
   0   0   416748.31 1356.99   1-0.98546-1.22872 1.13873 0.53306 0.98546 0.67392
   0   0   418414.95 1712.13   1-0.98725-1.22994 1.11227 0.50693 0.17387-0.13733
   0   0  -415118.76 1143.03   1-0.89026-0.64756 0.24312 0.84846-0.62803-0.31683
   0   0   419456.54 1468.85   1-0.47583-0.71834 0.72068 0.11491-0.47583-0.78787
   0   0  -420365.46 1229.15   1-0.75574-0.51323 0.14313 0.74889-0.75574-0.44370
   0   0   417241.76 1714.77   1-0.91248-1.15502 1.05189 0.44635 0.02926-0.28192
   0   0  -418999.81 1275.24   1-0.99482-0.75218 0.32354 0.92870-0.50964-0.19850
   0   0  -5 1425.88  355.98   1-0.86515-0.56187 0.17347 0.93102 0.86515 1.25516
   0   0   5 1389.75  425.16   1-0.97245-1.27654 1.22553 0.46844 0.97245 0.58302
   0   0   5 1287.27  441.95   1-0.97497-1.27835 1.20330 0.44663 0.28001-0.10899
   0   0  -5 1412.91  384.46   1-0.85373-0.55036 0.11685 0.87352-0.72237-0.33337
   0   0   5 1249.86  428.42   1-0.43495-0.73809 0.78872 0.03152-0.43495-0.82500
   0   0  -5 1416.17  431.00   1-0.78483-0.48169 0.06680 0.82402-0.78483-0.39478
   0   0   5 1216.81  537.42   1-0.88989-1.19305 1.13427 0.37734 0.09986-0.28913
   0   0  -5 1438.78  385.35   1-0.99285-0.68956 0.22349 0.97995-0.57402-0.18509
   0   0  -612616.16 1022.04   1-0.82467-0.46074 0.04600 0.95508 0.82467 1.29270
   0   0   611960.93 1215.60   1-0.95334-1.31824 1.30768 0.39916 0.95334 0.48602
   0   0   611011.83 1466.71   1-0.95657-1.32038 1.28894 0.38018 0.38663-0.08055
   0   0  -611770.89 1022.22   1-0.81087-0.44683-0.01398 0.89403-0.81517-0.34837
   0   0   610762.96 1219.10   1-0.39267-0.75644 0.85581-0.05285-0.39267-0.86074
   0   0  -610252.44  898.96   1-0.81254-0.44877-0.01050 0.89816-0.81254-0.34448
   0   0   613082.99 1552.77   1-0.86433-1.22812 1.21451 0.30619 0.17120-0.29558
   0   0  -611881.92 1061.50   1-0.98793-0.62397 0.12132 1.02906-0.63765-0.17094
   0   0  -711573.37 1378.53   1-0.77747-0.35288-0.08657 0.97402 0.77747 1.32350
   0   0   710690.12 1141.67   1-0.92749-1.35320 1.38467 0.32476 0.92749 0.38228
   0   0   7 9178.94 1223.78   1-0.93099-1.35545 1.37041 0.31019 0.49604-0.04901
   0   0   710777.94 1223.08   1-0.34896-0.77336 0.92188-0.13820-0.34896-0.89503
   0   0   711818.91 1194.47   1-0.83567-1.26011 1.29252 0.23281 0.24332-0.30126
   0   0   831678.64 2431.66   1-0.89398-1.38051 1.45583 0.24450 0.89398 0.27089
   0   0   828621.94 2635.88   1-0.89739-1.38248 1.44611 0.23442 0.60740-0.01552
   0   0   832725.71 2494.28   1-0.30374-0.78877 0.98690-0.22463-0.30374-0.92783
   0   0   835743.30 2498.77   1-0.80372-1.28877 1.36813 0.15706 0.31627-0.30610
   0   0   920265.00 1765.78   1-0.25694-0.80260 1.05082-0.31217-0.25694-0.95904
   0   0   919246.56 1826.28   1-0.76821-1.31391 1.44122 0.07873 0.39013-0.31005
   0  -1  10  703.31  324.50   1-0.21136-0.87875 1.10987-0.25151-0.21136-0.89257
   0  -1  10  747.32  428.23   1-0.68385-1.35123 1.58056 0.21982 0.54305-0.13609
   0  -1   9  532.71  374.65   1-0.76356-1.37039 1.60332 0.39338 0.90193 0.29996
   0  -1   9  617.99  301.22   1-0.25600-0.86276 1.05206-0.15788-0.25600-0.85920
   0  -1   9  623.16  351.37   1-0.71983-1.32658 1.52620 0.31684 0.48116-0.12019
   0  -1   8 6764.73  992.29   1-0.80854-1.35614 1.56666 0.50871 0.80854 0.28447
   0  -1   8 6277.82 1180.77   1-0.80998-1.35617 1.56544 0.50694 0.81696 0.29285
   0  -1   8 6601.91 1093.61   1-0.29832-0.84445 0.99448-0.06401-0.29832-0.82351
   0  -1   8 6548.12 1079.35   1-0.75113-1.29724 1.47295 0.41500 0.42341-0.10013
   0   1  -7 9492.19 1086.63   1-0.89391-0.40810 0.27505 1.18232 0.89391 1.34099
   0  -1   7 8364.65  937.55   1-0.83903-1.32580 1.53523 0.62869 0.83903 0.39284
   0  -1   7 6157.79 1077.76   1-0.84503-1.33059 1.52691 0.61988 0.74256 0.29632
   0   1  -7 7787.13 1017.32   1-0.82647-0.34068 0.03187 0.93791-0.78322-0.33749
   0  -1   7 8620.25 1155.48   1-0.33809-0.82360 0.93782 0.03075-0.33809-0.78528
   0  -1   7 9245.79 1364.67   1-0.77755-1.26303 1.42295 0.51639 0.37133-0.07441
   0   1  -7 8723.44  913.39   1-0.99234-0.50671 0.20929 1.11512-0.58299-0.13730
   0   1  -617542.57 2101.46   1-0.93965-0.51449 0.46786 1.22361 0.93965 1.30873
   0  -1   619925.97 1685.63   1-0.85985-1.28580 1.50918 0.75407 0.85985 0.49155
   0  -1   618765.33 1751.59   1-0.86950-1.29443 1.49334 0.73778 0.68372 0.31535
   0   1  -620131.62 1825.23   1-0.88399-0.45887 0.22022 0.97493-0.64549-0.27756
   0  -1   623841.56 1694.80   1-0.37483-0.79970 0.88318 0.12756-0.37483-0.74400
   0   1  -624325.69 1475.94   1-0.77311-0.34824 0.09812 0.85373-0.77311-0.40394
   0  -1   622914.58 1980.79   1-0.79844-1.22328 1.37968 0.62448 0.32769-0.04026
   0   1  -624015.87 1750.61   1-0.99487-0.56989 0.34737 1.10191-0.49399-0.12610
   0   1  -521644.52 1657.30   1-0.97566-0.61052 0.68157 1.28527 0.97566 1.26608
   0  -1   519528.63 1440.55   1-0.86943-1.23457 1.49570 0.89200 0.86943 0.57901
   0  -1   517364.66 1628.81   1-0.88206-1.24635 1.47343 0.86932 0.65075 0.36024
   0   1  -514824.88 1392.31   1-0.93456-0.57012 0.42647 1.02983-0.48241-0.19229
   0  -1   519699.43 1519.48   1-0.40751-0.77175 0.83262 0.22846-0.40751-0.69867
   0   1  -522134.06 1467.89   1-0.73788-0.37363 0.18787 0.79204-0.73788-0.44672
   0  -1   522240.47 1948.54   1-0.81202-1.17623 1.34948 0.74566 0.29796 0.00780
   0   1  -519704.26 1986.82   1-0.99127-0.62695 0.49837 1.10162-0.39206-0.10194
   0   1  -4   64.02   98.69   1-0.99443-0.69010 0.92264 1.37490 0.99443 1.20695
   0  -1   4   85.33  103.70   1-0.86180-1.16612 1.50653 1.05425 0.86180 0.64927
   0  -1   4  219.66  230.78   1-0.87581-1.17946 1.48358 1.03094 0.66741 0.45477
   0   1  -4   97.09   96.60   1-0.97661-0.67284 0.67396 1.12600-0.26832-0.05599
   0  -1   4   62.64   79.95   1-0.43389-0.73751 0.79044 0.33772-0.43389-0.64704
   0   1  -4  114.32  104.73   1-0.69756-0.39394 0.28376 0.73649-0.69756-0.48441
   0  -1   4   91.86  112.16   1-0.81358-1.11716 1.34590 0.89346 0.29447 0.08211
   0   1  -4  116.34  110.79   1-0.97799-0.67434 0.67610 1.12805-0.26551-0.05319
   0   1  -387166.17 3170.61   1-0.97377-0.73026 1.21842 1.51929 0.97377 1.10842
   0  -1   3100514.3 3394.56   1-0.81617-1.05969 1.55946 1.25860 0.81617 0.68153
   0  -1   383180.99 4005.33   1-0.81985-1.06287 1.55556 1.25437 0.79701 0.66223
   0   1  -3103702.5 3512.24   1-0.99351-0.75041 1.02129 1.32197 0.07372 0.20824
   0  -1   398354.60 4020.33   1-0.44800-0.69099 0.76735 0.46606-0.44800-0.58314
   0   1  -3108168.3 3504.41   1-0.64771-0.40472 0.39395 0.69522-0.64771-0.51257
   0  -1   3100049.5 3535.08   1-0.78741-1.03035 1.40298 1.10194 0.35104 0.21647
   0   1  -211620.51 1020.04   1-0.81588-0.63319 1.55974 1.70919 0.81588 0.87264
   0   1  -2 9058.46 1043.53   1-0.82042-0.63805 1.55496 1.70468 0.79583 0.85274
   0  -1   213015.91 1153.93   1-0.42777-0.61013 0.80034 0.65049-0.42777-0.48490
   0   1  -212333.60 1177.56   1-0.57193-0.38957 0.54694 0.69681-0.57193-0.51480
   0   1  -211078.05 1150.61   1-0.81790-0.63558 1.33586 1.48552 0.28475 0.34151
   0   1  -1 9024.06  990.13   1 0.13377 0.25566-1.46252-1.46432-0.13377-0.15471
   0   1  -1 8764.38  975.54   1-0.23941-0.11753 1.53750 1.53552 0.23941 0.21828
   0   1  -1 9173.85  969.49   1-0.34749-0.22574-0.94422-0.94619-1.31835-1.33942
   0   1  -1 9167.96 1137.45   1-0.33354-0.21180 0.94442 0.94284-0.33354-0.35442
   0   1  -1 9560.05 1075.77   1 0.04341 0.16509 1.83567 1.83393 1.23901 1.21798
   0   1  -1 8657.50  944.35   1-0.20793-0.08623-1.73994-1.74191-1.29552-1.31658
   0  -1   0  171.88  116.44   1-0.42433-0.48556-0.80589-0.65258 0.42433 0.52327
   0   1   0  129.62  115.66   1-0.50788-0.44665-0.66499-0.81830 0.50788 0.40893
   0   1   0  146.91  133.02   1-0.78107-0.71999-0.09696-0.25026-0.87144-0.97032
   0  -1   0  165.04  140.41   1-0.72042-0.78150-0.25068-0.09738-0.97032-0.87144
   0   1   0  194.05  184.03   1-0.86716-0.80605-0.18022-0.33325-0.86716-0.96605
   0   1   0  239.94  200.52   1-0.94360-0.88258-0.26247-0.41566-0.85791-0.95672
   0  -1   0  177.88  160.97   1-0.90823-0.96925-0.44371-0.29051-0.95144-0.85263
   0  -1  -1 6637.19  764.53   1-0.67244-0.67302-0.34033-0.03550 0.67244 0.84939
   0   1   1 5265.63  783.21   1-0.90763-0.90723 0.30994 0.00529-0.57617-0.75285
   0  -1  -1 7083.31  849.99   1-0.82101-0.82141 0.01560 0.32024-0.79463-0.61795
   0   1   1 6321.70  738.34   1-0.67373-0.67326 0.33749 0.03300-0.67373-0.85064
   0   1   1 6603.22  923.56   1-0.99459-0.99423 0.29798-0.00651-0.52628-0.70289
   0  -1  -1 6599.97  706.12   1-0.97793-0.97829-0.00407 0.30043-0.71287-0.53626
   0  -1  -257524.97 2231.22   1-0.74649-0.68641-0.16649 0.28984 0.74649 1.00144
   0   1   263010.75 2571.24   1-0.91610-0.97618 0.36239-0.09395 0.91610 0.66115
   0  -1  -260423.83 2518.23   1-0.84018-0.77991 0.07377 0.52975-0.75348-0.49900
   0   1   250798.13 2617.23   1-0.59670-0.65685 0.49867 0.04275-0.59670-0.85161
   0   1   253750.23 2514.38   1-0.98761-1.04791 0.56302 0.10723-0.34688-0.60127
   0  -1  -264787.50 2621.00   1-0.98641-0.92611 0.09821 0.55399-0.65175-0.39736
   0  -1  -3 6103.68  723.50   1-0.76350-0.64277-0.12321 0.48463 0.76350 1.09645
   0   1   3 6222.18 1027.25   1-0.96741-1.08815 0.62281 0.01497 0.96741 0.63446
   0   1   3 5685.34  694.57   1-0.98434-1.10529 0.74349 0.13619-0.20414-0.53642
   0  -1  -3 5268.91  704.99   1-0.83347-0.71252 0.05307 0.66037-0.76824-0.43596
   0   1   3 5850.31  887.42   1-0.54014-0.66092 0.60671-0.00066-0.54014-0.87307
   0  -1  -3 5822.67  738.88   1-0.98664-0.86568 0.10146 0.70854-0.64977-0.31760
   0  -1  -416081.16 1171.03   1-0.75582-0.57443-0.14293 0.61643 0.75582 1.16679
   0   1   416744.69 1338.65   1-0.98980-1.17200 0.82270 0.06363 0.98980 0.57924
   0   1   415907.74 1309.41   1-0.99406-1.17569 0.89541 0.13676-0.05683-0.46692
   0  -1  -415203.46 1096.74   1-0.81364-0.63202-0.00599 0.75267-0.80965-0.39956
   0   1   414115.37 1224.27   1-0.48982-0.67123 0.69663-0.06217-0.48982-0.90075
   0   1   414437.00 1382.16   1-0.94974-1.13123 0.87821 0.11954-0.11204-0.52206
   0  -1  -415531.96 1407.12   1-0.98383-0.80222 0.06320 0.82156-0.67291-0.26295
   0  -1  -540678.25 2067.97   1-0.73379-0.49174-0.19791 0.71294 0.73379 1.22274
   0   1   537334.98 2266.77   1-0.99477-1.23778 0.98278 0.07230 0.99477 0.50632
   0   1   535635.90 2139.43   1-0.99325-1.23555 1.02740 0.11743 0.08029-0.40759
   0  -1  -537056.78 1883.21   1-0.78456-0.54227-0.08752 0.82245-0.86514-0.37726
   0   1   535977.46 1955.43   1-0.44162-0.68366 0.77784-0.13240-0.44162-0.93056
   0  -1  -535838.92 1974.49   1-0.83052-0.58848-0.06351 0.84672-0.83052-0.34158
   0   1   534711.81 2050.50   1-0.92561-1.16772 0.99739 0.08734-0.01612-0.50394
   0  -1  -538255.51 1880.98   1-0.97862-0.73635 0.00314 0.91280-0.70863-0.22088
   0  -1  -6 3387.86  653.78   1-0.70115-0.39844-0.27549 0.78689 0.70115 1.26812
   0   1   6 3780.90  812.23   1-0.98755-1.29138 1.11913 0.05724 0.98755 0.42121
   0   1   6 3397.97  748.11   1-0.98353-1.28650 1.14546 0.08416 0.21182-0.35386
   0  -1  -6 3321.40  713.00   1-0.74747-0.44450-0.18432 0.87699-0.92849-0.36281
   0   1   6 3549.15  626.83   1-0.39390-0.69656 0.85391-0.20777-0.39390-0.96085
   0   1   6 3310.76  857.07   1-0.89853-1.20128 1.10422 0.04278 0.07381-0.49180
   0  -1  -6 3365.30  665.50   1-0.97090-0.66797-0.07025 0.99069-0.75130-0.18577
   0  -1  -7 1039.13  357.74   1-0.65916-0.29580-0.36937 0.84452 0.65916 1.30413
   0   1   7  777.16  324.01   1-0.96996-1.33462 1.23830 0.02499 0.96996 0.32574
   0   1   7  848.88  362.01   1-0.96544-1.32878 1.25198 0.03855 0.33970-0.30418
   0   1   7  797.22  341.21   1-0.34584-0.70913 0.92647-0.28664-0.34584-0.99080
   0   1   7  893.80  384.15   1-0.86841-1.23179 1.20246-0.01036 0.16031-0.48310
   0   1   815001.20 1784.33   1-0.93845-1.36243 1.34951-0.01538 0.46708-0.25466
   0   1   817283.37 1583.40   1-0.29696-0.72088 0.99637-0.36820-0.29696-1.01994
   0   1   817993.12 1856.19   1-0.83505-1.25907 1.29409-0.07011 0.24481-0.47639
   0  -2  10 9681.27 1389.54   1-0.61559-1.34402 1.66688 0.45925 0.64940 0.06908
   0  -2   943069.60 3180.20   1-0.59050-1.25844 1.66093 0.60420 1.13232 0.62918
   0  -2   962667.71 3212.92   1-0.64392-1.31172 1.63347 0.57723 0.60686 0.10433
   0   2  -8  898.42  308.28   1-0.93995-0.33224 0.46929 1.37475 0.93995 1.36609
   0  -2   8  647.13  286.29   1-0.67561-1.28427 1.64160 0.73705 0.67561 0.25056
   0  -2   8  644.30  331.79   1-0.62593-1.23322 1.65732 0.75203 1.09361 0.66832
   0  -2   8  821.00  419.28   1-0.66467-1.27182 1.60688 0.70202 0.57430 0.14957
   0   2  -8  815.23  327.61   1-0.99403-0.38671 0.26542 1.16936-0.54729-0.12263
   0   2  -717141.40 1609.68   1-0.97906-0.43123 0.70907 1.46220 0.97906 1.32623
   0  -2   714784.02 1542.44   1-0.68770-1.23553 1.63794 0.88479 0.68770 0.34053
   0  -2   712561.46 1900.01   1-0.63755-1.18420 1.65535 0.90152 1.08010 0.73268
   0   2  -714598.00 1530.82   1-0.90316-0.35630 0.29225 1.04500-0.59002-0.24317
   0   2  -718546.06 1544.48   1-0.77264-0.22603 0.09936 0.85338-0.77264-0.42435
   0  -2   718614.22 1906.29   1-0.67564-1.22217 1.59204 0.83857 0.55656 0.20964
   0   2  -718374.97 1533.98   1-0.99367-0.44702 0.43272 1.18535-0.43699-0.09012
   0   2  -661357.59 3711.99   1-0.99487-0.50785 0.95835 1.56007 0.99487 1.26415
   0  -2   668305.40 3604.70   1-0.67967-1.16668 1.64043 1.03870 0.67967 0.41039
   0  -2   650729.61 3539.71   1-0.61641-1.10242 1.65864 1.05627 1.10437 0.83482
   0   2  -653365.38 3433.52   1-0.96444-0.47825 0.58778 1.18917-0.34531-0.07626
   0   2  -673019.05 3313.62   1-0.73529-0.24932 0.19423 0.79682-0.73529-0.46501
   0  -2   671559.97 4403.03   1-0.67196-1.15785 1.59709 0.99500 0.56256 0.29343
   0   2  -673724.03 3284.33   1-0.98310-0.49711 0.62219 1.22353-0.30468-0.03559
   0   2  -552200.18 2162.92   1-0.97319-0.54699 1.22158 1.67188 0.97319 1.16459
   0  -2   545300.53 2285.64   1-0.64128-1.06748 1.64937 1.19906 0.64128 0.44989
   0   2  -543624.66 2766.62   1-0.99487-0.56935 0.95379 1.40385 0.00266 0.19391
   0   2  -550250.89 2151.51   1-0.69210-0.26675 0.29626 0.74739-0.69210-0.49983
   0  -2   544194.22 2429.11   1-0.64192-1.06719 1.63594 1.18525 0.60993 0.41860
   0   2  -542122.03 2788.15   1-0.95470-0.52944 0.84942 1.30011-0.13458 0.05674
   0   2  -410086.41 1153.67   1-0.88102-0.51564 1.47790 1.77679 0.88102 0.99453
   0  -2   410707.63 1193.43   1-0.55108-0.91647 1.65356 1.35467 0.55108 0.43757
   0  -2   4 7064.58 1519.11   1-0.34526-0.71001 1.60771 1.30827 1.31953 1.20571
   0   2  -4 6508.71 1069.97   1-0.92009-0.55533 1.39790 1.69734 0.53519 0.64901
   0   2  -412027.13 1193.94   1-0.63867-0.27395 0.41305 0.71276-0.63867-0.52441
   0  -2   410411.42 1202.62   1-0.55327-0.91790 1.72977 1.43046 0.73602 0.62249
   0   2  -4 8638.89  816.42   1-0.88280-0.51817 1.15770 1.45702 0.12042 0.23395
   0   2  -321483.75 1455.94   1-0.66213-0.35756 1.64510 1.79257 0.66213 0.69775
   0  -2   324293.31 1988.15   1-0.37243-0.67700 1.60799 1.46052 0.37243 0.33680
   0  -2   321719.47 2209.86   1 0.01786-0.28625 1.34496 1.19699 1.40673 1.37079
   0   2  -323795.12 1918.53   1-0.52195-0.21784 1.65877 1.80674 1.19778 1.23373
   0   2  -325847.88 1698.83   1-0.56206-0.25797 0.56577 0.71403-0.56206-0.52581
   0  -2   321624.10 1781.18   1-0.30530-0.60929 1.86799 1.72006 1.00703 0.97129
   0   2  -324950.43 1659.11   1-0.67243-0.36843 1.59644 1.74436 0.56179 0.59753
   0   2  -2 6049.17  773.23   1 0.08003 0.32380-1.41836-1.42195-0.08003-0.12192
   0   2  -2 5200.55  700.39   1-0.29146-0.04770 1.56841 1.56444 0.29146 0.24919
   0   2  -2 5670.45  867.63   1 0.13275 0.37623 1.22315 1.21967 1.39438 1.35247
   0   2  -2 5975.49  788.97   1-0.41557-0.17207-0.84038-0.84433-1.27833-1.32050
   0  -2   2 4239.75  652.52   1-0.11491-0.35838 1.22495 1.22815-0.11491-0.07315
   0   2  -2 6267.97  827.74   1-0.40343-0.15997 0.83905 0.83587-0.40343-0.44519
   0   2  -2 5178.91  971.14   1-0.03944 0.20392 1.86447 1.86100 1.19779 1.15573
   0   2  -2 5578.87  681.92   1-0.28751-0.04415-1.67445-1.67827-1.31024-1.35230
   0  -2   1 6626.63  720.06   1-0.10668-0.28979-1.23417-1.07907 0.10668 0.22656
   0   2  -1 6804.12  966.62   1-0.26455-0.08143-1.04065-1.19577 0.26455 0.14466
   0   2  -1 6614.78  865.81   1-0.66892-0.48609-0.36880-0.52407-1.04146-1.16141
   0   2  -1 6679.50 1031.39   1-0.85503-0.67226-1.51559-1.67030-0.85503-0.97490
   0   2  -1 7669.18 1218.16   1-0.80522-0.62252-0.81097-0.96610-1.11821-1.23807
   0  -2   0144390.9 3820.62   1-0.38096-0.50342-0.87383-0.56722 0.38096 0.57885
   0   2   0152004.1 4274.08   1-0.54807-0.42561-0.59203-0.89866 0.54807 0.35018
   0   2   0132596.8 3569.75   1-0.80894-0.68679-0.01954-0.32614-0.81900-1.01675
   0  -2   0145031.6 4165.75   1-0.68765-0.80980-0.32697-0.02036-1.01675-0.81900
   0   2   0134310.3 4134.89   1-0.81779-0.69558-0.02573-0.33180-0.81779-1.01558
   0  -2   0138878.3 4854.21   1-0.96796-1.09017-0.62643-0.32036-0.96796-0.77018
   0   2   0121138.8 4319.37   1-0.95794-0.83591-0.17056-0.47695-0.80787-1.00550
   0  -2   0157881.7 4117.04   1-0.88720-1.00924-0.53306-0.22666-0.99494-0.79731
   0  -2  -131444.31 1742.21   1-0.52799-0.58980-0.62893-0.17080 0.52799 0.80388
   0   2   125413.26 2108.61   1-0.89044-0.82897 0.24379-0.21415-0.62751-0.90307
   0  -2  -130452.06 1634.99   1-0.74837-0.80984-0.18206 0.27588-0.92705-0.65149
   0   2   123409.09 1857.87   1-0.67825-0.61667 0.32746-0.13005-0.67825-0.95404
   0  -2  -130661.15 1952.58   1-0.88268-0.94425-0.23404 0.22348-0.88268-0.60688
   0   2   127998.04 1678.26   1-0.99200-0.93062 0.20053-0.25716-0.58850-0.86392
   0  -2  -132675.50 1920.36   1-0.94352-1.00489-0.26295 0.19473-0.85817-0.58275
   0  -2  -2  485.76  215.76   1-0.59810-0.59925-0.49590 0.11376 0.59810 0.95199
   0   2   2  405.52  221.10   1-0.85395-0.85280 0.13662-0.47302 0.85395 0.50005
   0  -2  -2  556.53  213.95   1-0.76728-0.76808-0.13353 0.47576-0.89560-0.54224
   0   2   2  440.44  233.24   1-0.59934-0.59839 0.49342-0.11554-0.59934-0.95315
   0  -2  -2  492.22  237.62   1-0.85513-0.85609-0.14047 0.46848-0.85513-0.50133
   0   2   2  439.38  232.79   1-0.99324-0.99252 0.44756-0.16142-0.42691-0.78012
   0  -2  -2  545.14  207.79   1-0.95992-0.96064-0.15653 0.45245-0.80008-0.44687
   0  -2  -3 3787.51  561.02   1-0.62571-0.56620-0.44003 0.32113 0.62571 1.05761
   0   2   3 4097.49  831.52   1-0.92544-0.98494 0.40229-0.35887 0.92544 0.49354
   0   2   3 3302.08  605.24   1-0.97129-1.03117 0.63382-0.12679-0.30452-0.73568
   0  -2  -3 3923.46  542.95   1-0.76492-0.70505-0.13969 0.62092-0.89963-0.46847
   0   2   3 3654.14  663.87   1-0.53822-0.59789 0.61026-0.15013-0.53822-0.97003
   0  -2  -3 4015.45  704.62   1-0.85232-0.79264-0.13137 0.62901-0.85232-0.42050
   0  -2  -3 4551.15  587.70   1-0.96375-0.90381-0.12826 0.63201-0.78426-0.35327
   0  -2  -4 9634.82  925.57   1-0.62821-0.50804-0.43486 0.47780 0.62821 1.13811
   0   2   4 9747.53 1203.56   1-0.96743-1.08758 0.62288-0.28979 0.96743 0.45752
   0   2   4 6956.89 1110.59   1-0.98844-1.10898 0.79042-0.12153-0.15972-0.66868
   0  -2  -4 8911.38  931.92   1-0.74932-0.62877-0.17967 0.73227-0.92552-0.41656
   0   2   4 8265.99  977.03   1-0.48382-0.60413 0.70698-0.20485-0.48382-0.99365
   0  -2  -4 9105.02 1007.74   1-0.86020-0.73989-0.15703 0.75481-0.86020-0.35037
   0  -2  -4 9470.67 1054.79   1-0.96189-0.84129-0.14219 0.76937-0.79208-0.28330
   0  -2  -5 5086.67  762.33   1-0.61397-0.43316-0.46403 0.60015 0.61397 1.20188
   0   2   5 4234.50  862.62   1-0.98916-1.17112 0.81382-0.25007 0.98916 0.40169
   0   2   5 4683.65  824.56   1-0.99476-1.17598 0.93092-0.13236-0.02085-0.60761
   0  -2  -5 4543.55  697.15   1-0.72383-0.54261-0.24249 0.82079-0.96523-0.37847
   0   2   5 4541.93  798.44   1-0.43217-0.61311 0.79324-0.27003-0.43217-1.02000
   0  -2  -5 4603.14  648.04   1-0.87312-0.69218-0.20053 0.86274-0.87312-0.28528
   0   2   5 4933.71  821.24   1-0.94205-1.12311 0.91953-0.14364-0.07927-0.66592
   0  -2  -5 4256.79  721.45   1-0.95635-0.77508-0.18160 0.88125-0.81397-0.22741
   0  -2  -666262.76 2875.56   1-0.58702-0.34555-0.51771 0.69797 0.58702 1.25294
   0   2   660691.29 3187.34   1-0.99482-1.23759 0.97731-0.23798 0.99482 0.32946
   0   2   660960.34 3424.49   1-0.99158-1.23347 1.05881-0.15580 0.11438-0.55017
   0  -2  -654052.89 2952.44   1-0.68983-0.44793-0.32204 0.89258-1.01381-0.34925
   0   2   657120.12 3112.56   1-0.38145-0.62301 0.87309-0.34162-0.38145-1.04729
   0   2   658588.52 3205.81   1-0.91591-1.15761 1.03820-0.17635 0.01776-0.64667
   0   2   7 3096.89  664.98   1-0.98730-1.29089 1.12157-0.24515 0.98730 0.24406
   0   2   7 2901.09  640.26   1-0.97934-1.28191 1.17612-0.18982 0.24762-0.49473
   0   2   7 2987.35  723.87   1-0.33071-0.63290 0.94852-0.41763-0.33071-1.07456
   0   2   7 2999.22  680.49   1-0.88616-1.18850 1.14673-0.21922 0.11076-0.63148
   0   2   8  203.84  203.30   1-0.95797-1.32086 1.28349-0.23460 0.37962-0.44094
   0   2   8  203.55  237.54   1-0.27935-0.64217 1.02064-0.49697-0.27935-1.10122
   0   2   8  196.43  225.24   1-0.85277-1.21573 1.24731-0.27002 0.20117-0.61887
   0  -3  10 2511.78  566.34   1-0.18247-0.97206 1.14573 0.09042-0.18247-0.66590
   0  -3  10 1982.87  706.91   1-0.51440-1.30387 1.76244 0.70793 0.78575 0.30426
   0  -3   922243.06 1919.05   1-0.49464-1.22517 1.64608 0.74350 0.49464 0.09072
   0  -3   912905.45 2028.87   1-0.28221-1.01126 1.57612 0.67260 1.34916 0.94484
   0  -3   925384.07 2464.31   1-0.21491-0.94388 1.10538 0.20151-0.21491-0.62033
   0  -3   922619.31 2189.52   1-0.52732-1.25617 1.75210 0.84898 0.76956 0.36587
   0   3  -8 9088.57  897.95   1-0.99294-0.32324 0.87767 1.62883 0.99294 1.31898
   0  -3   8 7200.27  968.83   1-0.50147-1.17118 1.64737 0.89620 0.50147 0.17543
   0  -3   8 4949.68 1055.28   1-0.28184-0.95024 1.57592 0.82385 1.34932 1.02286
   0  -3   8 8025.32 1054.81   1-0.24190-0.91024 1.07064 0.31821-0.24190-0.56931
   0  -3   8 7488.55 1264.52   1-0.52564-1.19385 1.75348 1.00174 0.77169 0.44580
   0   3  -8 9325.87 1073.58   1-0.99210-0.32376 0.47945 1.23018-0.40510-0.07926
   0   3  -7 7751.13  921.66   1-0.98638-0.37749 1.13046 1.73019 0.98638 1.23452
   0  -3   7 6223.69  969.06   1-0.48510-1.09399 1.64414 1.04441 0.48510 0.23695
   0  -3   7 3620.98  825.05   1-0.23203-0.83979 1.54655 0.94593 1.36817 1.11957
   0   3  -7 4900.81  887.38   1-0.98078-0.37284 0.70929 1.30871-0.23595 0.01201
   0  -3   7 7304.39  872.66   1-0.26135-0.86906 1.04493 0.44395-0.26135-0.51075
   0   3  -7 7441.25  943.08   1-0.74398-0.13627 0.17276 0.77373-0.74398-0.49458
   0  -3   7 6378.65  909.56   1-0.50194-1.10951 1.77195 1.17159 0.80105 0.55295
   0   3  -7 7624.56  882.90   1-0.97578-0.36811 0.69670 1.29613-0.25035-0.00230
   0   3  -612209.26 1277.14   1-0.93363-0.38555 1.36866 1.81698 0.93363 1.10389
   0  -3   611247.79 1229.11   1-0.43872-0.98679 1.63214 1.18381 0.43872 0.26845
   0  -3   6 9773.86 1478.14   1-0.12038-0.66750 1.46735 1.01820 1.39663 1.22590
   0   3  -610404.22 1455.30   1-0.98206-0.43479 1.15685 1.60495 0.22504 0.39522
   0  -3   612970.91 1408.66   1-0.26923-0.81631 1.03436 0.58482-0.26923-0.44061
   0   3  -613034.85 1245.87   1-0.70172-0.15463 0.27417 0.72373-0.70172-0.53033
   0  -3   612252.30 1216.73   1-0.44077-0.98772 1.81223 1.36326 0.87196 0.70166
   0   3  -6 8997.07 1564.09   1-0.93506-0.38812 0.95415 1.40310-0.05143 0.11886
   0   3  -5110458.4 3351.88   1-0.81473-0.32747 1.56085 1.85776 0.81473 0.90711
   0  -3   598754.66 4009.14   1-0.35205-0.83931 1.59905 1.30214 0.35205 0.25968
   0  -3   588260.18 4176.02   1 0.05884-0.42765 1.30362 1.00593 1.40451 1.31165
   0   3  -587279.25 3913.19   1-0.81896-0.33247 1.55647 1.85417 0.79883 0.89169
   0  -3   5112799.2 4527.67   1-0.25695-0.74340 1.05080 0.75270-0.25695-0.35032
   0  -3   586050.63 4372.16   1-0.30919-0.79550 1.86697 1.56939 1.00354 0.91103
   0   3  -4 2790.45  473.29   1-0.61357-0.18712 1.65300 1.79849 0.61357 0.62806
   0  -3   4 2491.98  522.82   1-0.21453-0.64094 1.52129 1.37592 0.21453 0.20013
   0   3  -4 1928.03  493.67   1-0.41463 0.01121 1.63474 1.78098 1.27894 1.29394
   0   3  -4 1968.42  543.18   1-0.27917 0.14674-1.04061-0.89518-1.35044-1.33587
   0  -3   4 2706.29  554.30   1-0.20300-0.62883 1.12038 0.97369-0.20300-0.21837
   0   3  -4 2655.12  530.13   1-0.58335-0.15752 0.52488 0.67155-0.58335-0.56798
   0  -3   4 2045.81  530.48   1-0.04670-0.47238 1.86639 1.72020 1.19377 1.17907
   0   3  -4 2432.74  577.63   1-0.60960-0.18392 1.67353 1.81972 0.65813 0.67284
   0   3  -3   27.23   64.12   1 0.02574 0.39139-1.36969-1.37510-0.02574-0.08856
   0   3  -3   49.21   74.55   1-0.34294 0.02267 1.59481 1.58890 0.34294 0.27955
   0   3  -3   43.84   93.28   1 0.05843 0.42365 1.30404 1.29881 1.40453 1.34167
   0   3  -3   29.10   78.09   1-0.48209-0.11684-0.73069-0.73660-1.23073-1.29396
   0  -3   3   24.40   58.35   1-0.03901-0.40421 1.30642 1.31119-0.03901 0.02362
   0   3  -3   17.23   57.20   1-0.47179-0.10659 0.72754 0.72277-0.47179-0.53443
   0   3  -3   62.97   98.05   1-0.12318 0.24185 1.88047 1.87527 1.14750 1.08440
   0   3  -3   41.78   96.09   1-0.36666-0.00163-1.59587-1.60160-1.31603-1.37913
   0   3  -2 2462.76  477.31   1-0.19365 0.11134-1.13199-1.28890 0.19365 0.05282
   0   3  -2 2455.95  605.00   1-0.63939-0.33482-0.43233-0.58958-1.07791-1.21895
   0  -3   2 2419.96  529.98   1-0.38697-0.69155-0.88500-0.72775-1.29617-1.15514
   0   3  -2 2297.93  467.68   1-0.16734 0.13722 1.16403 1.00782-0.16734-0.30799
   0   3  -2 2483.30  561.20   1-0.50082-0.19635-1.64725-1.80363-0.50082-0.64165
   0   3  -2 2655.28  536.75   1-0.72781-0.42343-1.01260-1.16962-1.19463-1.33551
   0  -3   2 2213.14  491.60   1-0.43981-0.74418-1.51027-1.35325-1.31285-1.17197
   0  -3   1194661.6 4592.66   1-0.17480-0.41915-1.15504-0.84663 0.17480 0.39363
   0   3  -1181598.8 4447.34   1-0.40703-0.16269-0.83339-1.14180 0.40703 0.18820
   0   3  -1191457.9 4904.38   1-0.75330-0.50940-0.16959-0.47816-0.91904-1.13786
   0  -3   1170528.9 5202.55   1-0.82299-1.06684-1.55267-1.24490-0.82299-0.60422
   0   3  -1199779.8 4957.41   1-0.90302-0.65930-0.46686-0.77517-0.96288-1.18155
   0  -3   1176220.0 4554.53   1-0.74447-0.98818-0.97274-0.66444-1.18051-0.96184
   0  -3   060602.26 2458.66   1-0.33653-0.52022-0.94009-0.48015 0.33653 0.63336
   0   3   056894.87 2335.96   1-0.58718-0.40349-0.51740-0.97734 0.58718 0.29035
   0   3   056213.45 2632.05   1-0.83517-0.65195 0.05827-0.40164-0.76454-1.06118
   0  -3   062120.07 2614.62   1-0.65324-0.83646-0.40289 0.05703-1.06118-0.76454
   0   3   055551.16 2465.20   1-0.76018-0.57687 0.13178-0.32732-0.76018-1.05685
   0  -3   057894.85 2798.78   1-0.98538-1.16859-0.76865-0.30950-0.98538-0.68868
   0   3   060763.36 2440.42   1-0.97003-0.78697-0.07780-0.53740-0.75563-1.05208
   0  -3  -1  333.42  232.84   1-0.43606-0.55909-0.78691-0.17547 0.43606 0.81090
   0   3   1  266.62  188.96   1-0.72621-0.60317-0.21632-0.82778 0.72621 0.35137
   0   3   1  264.78  220.65   1-0.89432-0.77177 0.25828-0.35297-0.61638-0.99081
   0  -3  -1  343.97  172.41   1-0.69450-0.81705-0.31138 0.29986-1.00741-0.63298
   0   3   1  302.96  189.29   1-0.65161-0.52893 0.38561-0.22493-0.65161-1.02630
   0  -3  -1  368.86  188.43   1-0.93519-1.05788-0.44657 0.16397-0.93519-0.56051
   0   3   1  376.41  191.92   1-0.99208-0.86968 0.20251-0.40837-0.58726-0.96149
   0  -3  -1  291.51  160.20   1-0.91058-1.03297-0.43306 0.17784-0.94614-0.57190
   0  -3  -2  483.73  227.47   1-0.49134-0.55372-0.69400 0.06896 0.49134 0.94418
   0   3   2  397.83  212.37   1-0.82816-0.76578 0.05641-0.70655 0.82816 0.37532
   0  -3  -2  388.73  195.80   1-0.70886-0.77074-0.27808 0.48451-0.98720-0.53497
   0   3   2  352.96  217.90   1-0.57825-0.51619 0.53478-0.22720-0.57825-1.03094
   0  -3  -2  428.11  204.38   1-0.90912-0.97117-0.33387 0.42812-0.90912-0.45642
   0   3   2  428.16  232.98   1-0.99401-0.93228 0.41876-0.34343-0.44642-0.89844
   0  -3  -2  428.71  250.94   1-0.92918-0.99092-0.34241 0.41978-0.90002-0.44799
   0  -3  -3126863.0 5901.46   1-0.51649-0.51822-0.64966 0.26482 0.51649 1.04734
   0   3   3137807.7 4906.99   1-0.90026-0.89854 0.29911-0.61534 0.90026 0.36942
   0   3   3135238.3 4726.80   1-0.96618-0.96498 0.59899-0.31493-0.33545-0.86549
   0  -3  -3135614.7 4145.49   1-0.70633-0.70753-0.28401 0.62989-0.99083-0.46080
   0   3   3127883.2 6282.53   1-0.51765-0.51622 0.64757-0.26584-0.51765-1.04835
   0  -3  -3141524.5 4914.70   1-0.90134-0.90276-0.30326 0.61017-0.90134-0.37063
   0   3   3127669.4 5619.55   1-0.98523-0.98415 0.59614-0.31733-0.32335-0.85316
   0  -3  -3134512.5 5080.17   1-0.93525-0.93633-0.30999 0.60349-0.88310-0.35329
   0  -3  -445603.81 2467.83   1-0.52055-0.46162-0.64238 0.42360 0.52055 1.12940
   0   3   444662.17 2858.87   1-0.94894-1.00787 0.51477-0.55121 0.94894 0.34009
   0   3   441433.30 2698.63   1-0.98476-1.04424 0.74779-0.31746-0.20011-0.80795
   0  -3  -442725.13 2462.00   1-0.69180-0.63233-0.31755 0.74770-1.01112-0.40329
   0   3   437774.62 2828.18   1-0.46241-0.52161 0.74337-0.32150-0.46241-1.07113
   0  -3  -442037.83 2376.44   1-0.90356-0.84436-0.31188 0.75300-0.90356-0.29484
   0  -3  -440751.92 2612.17   1-0.93449-0.87491-0.31411 0.75065-0.88527-0.27767
   0  -3  -5 3277.40  672.00   1-0.50881-0.38923-0.66334 0.55417 0.50881 1.19567
   0   3   5 2791.02  671.95   1-0.97918-1.10009 0.71010-0.50717 0.97918 0.29270
   0   3   5 2794.55  658.12   1-0.99375-1.11390 0.88557-0.33102-0.06669-0.75233
   0  -3  -5 2656.94  557.64   1-0.66769-0.54755-0.37150 0.84510-1.04303-0.35739
   0   3   5 2814.71  634.97   1-0.40943-0.52927 0.82961-0.38671-0.40943-1.09616
   0   3   5 2882.30  666.14   1-0.94885-1.06886 0.88319-0.33311-0.10812-0.79360
   0  -3  -6 5814.07  945.94   1-0.48423-0.30399-0.70628 0.66271 0.48423 1.24908
   0   3   6 4938.09  990.09   1-0.99379-1.17461 1.01380-0.35411 0.06571-0.69772
   0   3   6 4939.66  805.29   1-0.35720-0.53766 0.90968-0.45808-0.35720-1.12195
   0   3   6 5080.38  863.32   1-0.92372-1.10437 1.00562-0.36207-0.00933-0.77261
   0   3   7 1967.01  609.08   1-0.98498-1.22648 1.13339-0.38586 0.19792-0.64331
   0   3   7 1983.56  585.13   1-0.30483-0.54592 0.98538-0.53382-0.30483-1.14759
   0   3   7 2190.03  614.58   1-0.89453-1.13581 1.11834-0.40071 0.08601-0.75505
   0  -4  1133016.11 2298.32   1-0.11809-1.02942 1.22137 0.16765-0.11809-0.58064
   0  -4  10  679.16  355.53   1-0.14723-0.99793 1.18786 0.28558-0.14723-0.53177
   0  -4  10  621.97  379.41   1-0.36865-1.21917 1.84728 0.94588 0.94740 0.56473
   0  -4   917071.99 1763.43   1-0.32598-1.11757 1.58659 0.83739 0.32598 0.02108
   0  -4   916539.31 1824.50   1-0.17004-0.96011 1.16080 0.40995-0.17004-0.47657
   0  -4   914213.57 1763.73   1-0.35472-1.14461 1.85260 1.10260 0.96102 0.65616
   0   4  -8  735.47  324.77   1-0.97195-0.24118 1.22817 1.82593 0.97195 1.19896
   0  -4   8  814.15  370.09   1-0.31207-1.04284 1.57949 0.98171 0.31207 0.08505
   0  -4   8  251.17  326.41   1 0.16302-0.56647 1.18797 0.58910 1.38794 1.16031
   0  -4   8  799.38  331.88   1-0.18420-0.91364 1.14362 0.54423-0.18420-0.41272
   0  -4   8  800.50  394.63   1-0.31386-1.04312 1.86571 1.26708 0.99931 0.77224
   0   4  -8  756.98  304.09   1-0.97242-0.24307 0.72573 1.32327-0.22881-0.00178
   0   4  -7 7804.80  920.48   1-0.90408-0.23413 1.43680 1.88316 0.90408 1.05321
   0  -4   7 7998.50 1076.65   1-0.27253-0.94248 1.55764 1.11128 0.27253 0.12339
   0   4  -7 6160.31 1148.66   1-0.96153-0.29266 1.26907 1.71647 0.36121 0.51098
   0   4  -7 7385.88  852.71   1-0.22758 0.44143-1.10855-0.66238-1.36966-1.22051
   0  -4   7 8251.67 1051.16   1-0.18551-0.85433 1.14202 0.69406-0.18551-0.33602
   0   4  -7 7737.58  957.90   1-0.72151-0.05269 0.22762 0.67556-0.72151-0.57100
   0  -4   7 7591.89 1134.27   1-0.23170-0.90033 1.88111 1.43388 1.06911 0.91984
   0   4  -7 7968.83 1027.58   1-0.92490-0.25627 1.00053 1.44775-0.01354 0.13572
   0   4  -6 5797.85  782.81   1-0.78293-0.17380 1.58805 1.88298 0.78293 0.85418
   0  -4   6 5287.87  936.79   1-0.20348-0.81256 1.51381 1.21903 0.20348 0.13236
   0   4  -6 4709.64  884.57   1-0.75696-0.14873 1.60772 1.90367 0.91299 0.98489
   0   4  -6 4396.82  891.74   1-0.32405 0.28429-0.97814-0.68336-1.33024-1.25895
   0  -4   6 5509.68  882.07   1-0.16571-0.77389 1.16599 0.86948-0.16571-0.23820
   0   4  -6 5836.21  691.66   1-0.67579-0.06760 0.33292 0.62944-0.67579-0.60329
   0  -4   6 5410.66  942.35   1-0.08537-0.69336 1.87489 1.57905 1.17129 1.09982
   0   4  -6 5816.21  850.07   1-0.81962-0.21163 1.33180 1.62766 0.28082 0.35229
   0   4  -5 1116.61  324.20   1 0.10258 0.65078-1.43737-1.29305-0.10258-0.10834
   0   4  -5 1002.35  340.64   1-0.60783-0.05951 1.65347 1.79699 0.60783 0.60119
   0   4  -5 1190.04  404.48   1-0.39597 0.15162 1.62831 1.77279 1.29073 1.28476
   0   4  -5 1080.84  387.51   1-0.43597 0.11169-0.80766-0.66419-1.26468-1.27118
   0  -4   5 1090.48  390.01   1-0.10656-0.65411 1.23430 1.08924-0.10656-0.10104
   0   4  -5 1052.11  297.69   1-0.61906-0.07150 0.45368 0.59874-0.61906-0.62458
   0  -4   5  949.75  416.74   1 0.14782-0.39953 1.78096 1.63650 1.27885 1.28518
   0   4  -5  756.77  382.52   1-0.59952-0.05216 1.68443 1.82888 0.67261 0.66628
   0   4  -4 5706.17  704.80   1-0.02912 0.45841-1.31646-1.32363 0.02912-0.05463
   0   4  -4 5319.32  614.56   1-0.39386 0.09363 1.61665 1.60875 0.39386 0.30934
   0   4  -4 6018.05  799.24   1-0.01750 0.46945 1.37877 1.37179 1.40674 1.32291
   0   4  -4 4985.29  692.61   1-0.54698-0.05999-0.61491-0.62278-1.17523-1.25953
   0  -4   4 4978.79  780.24   1 0.03848-0.44843 1.38148 1.38785 0.03848 0.12201
   0   4  -4 5326.69  695.07   1-0.53854-0.05161 0.60966 0.60329-0.53854-0.62206
   0   4  -4 4338.35  919.96   1-0.20788 0.27884 1.88296 1.87603 1.08763 1.00351
   0   4  -4 5163.09  664.01   1-0.44487 0.04183-1.50384-1.51149-1.31229-1.39643
   0   4  -319120.46 1323.48   1-0.18213 0.24474-1.14615-1.30485 0.18213 0.02037
   0   4  -318412.61 1547.20   1-0.64687-0.22055-0.41650-0.57572-1.06895-1.23106
   0  -4   318010.63 1414.72   1-0.26951-0.69583-1.05363-0.89443-1.35435-1.19225
   0   4  -316380.75 1515.71   1-0.38524 0.04105 0.86727 0.70945-0.38524-0.54678
   0   4  -318841.37 1338.50   1-0.40013 0.02603-1.61904-1.77709-0.40013-0.56192
   0   4  -319370.44 1361.96   1-0.70412-0.27806-1.06649-1.22542-1.21287-1.37478
   0  -4   316895.42 1252.95   1-0.25465-0.68070-1.70307-1.54415-1.30520-1.14329
   0  -4   2   36.40   65.19   1-0.02591-0.39214-1.31967-1.00945 0.02591 0.26568
   0   4  -2   19.11   63.07   1-0.34164 0.02458-0.93263-1.24285 0.34164 0.10187
   0   4  -2   42.82   71.94   1-0.73200-0.36635-0.22269-0.53323-0.95284-1.19274
   0  -4   2   72.29  107.05   1-0.45111-0.81675-0.78285-0.47231-1.25401-1.01410
   0   4  -2   59.22   94.23   1 0.11280 0.47847 1.44576 1.13651 0.11280-0.12674
   0   4  -2   42.68  109.06   1-0.97319-0.60764-1.22162-1.53105-0.97319-1.21291
   0   4  -2   23.81   65.40   1-0.86273-0.49734-0.62577-0.93599-1.03815-1.27786
   0  -4   2   30.70   80.17   1-0.58301-0.94841-1.30046-0.99023-1.27883-1.03912
   0  -4   195803.53 3387.67   1-0.18089-0.48647-1.14767-0.68592 0.18089 0.49867
   0   4  -185626.83 2972.05   1-0.49267-0.18710-0.69167-1.15341 0.49267 0.17490
   0   4  -193123.09 2879.54   1-0.80247-0.49750-0.03796-0.49984-0.83164-1.14935
   0   4  -182790.31 3100.13   1-0.84140-0.53636-0.09686-0.55755-0.84140-1.15895
   0  -4   177723.72 3450.46   1-0.89522-1.20014-1.45361-0.99280-0.89522-0.57756
   0   4  -193448.65 3080.55   1-0.94296-0.63823-0.26624-0.72776-0.85993-1.17742
   0  -4   197923.15 3652.18   1-0.75537-1.06010-0.94571-0.48419-1.17065-0.85316
   0  -4   093636.46 3097.63   1-0.29101-0.53593-1.00463-0.39138 0.29101 0.68679
   0   4   084368.89 2795.30   1-0.85972-0.61543 0.13647-0.47674-0.70802-1.10353
   0  -4   090492.66 2589.87   1-0.61715-0.86145-0.47840 0.13481-1.10353-0.70803
   0   4   077367.28 2960.64   1-0.69374-0.44932 0.29252-0.31963-0.69374-1.08931
   0  -4   074906.22 3228.68   1-0.99406-1.23836-0.90824-0.29605-0.99406-0.59847
   0   4   089544.99 3310.50   1-0.97981-0.73573 0.01583-0.59697-0.70114-1.09641
   0  -4  -192235.96 3791.52   1-0.36297-0.54724-0.90106-0.13630 0.36297 0.83675
   0   4   189840.64 3706.77   1-0.73523-0.55096-0.19439-0.95915 0.73523 0.26145
   0   4   176912.98 3327.41   1-0.90535-0.72172 0.30085-0.46369-0.58330-1.05660
   0  -4  -188192.97 2931.49   1-0.64666-0.83028-0.41695 0.34759-1.06921-0.59590
   0   4   190414.75 3184.14   1-0.60673-0.42295 0.47865-0.28494-0.60673-1.08032
   0  -4  -190390.01 3131.67   1-0.96937-1.15315-0.63592 0.12766-0.96937-0.49579
   0   4   192881.89 3109.12   1-0.99346-0.81005 0.24299-0.52112-0.56164-1.03470
   0  -4  -2  898.49  296.76   1-0.40525-0.52886-0.83619 0.08008 0.40525 0.95704
   0   4   2  651.20  320.55   1-0.82279-0.69918 0.04042-0.87586 0.82279 0.27100
   0   4   2  706.25  287.42   1-0.94068-0.81773 0.45594-0.45995-0.45801-1.00913
   0  -4  -2  716.68  249.35   1-0.65654-0.77949-0.39578 0.52011-1.05710-0.50598
   0   4   2  773.32  303.77   1-0.54049-0.41733 0.60607-0.30895-0.54049-1.09208
   0  -4  -2  679.12  247.95   1-0.94935-1.07251-0.51691 0.39812-0.94935-0.39776
   0   4   2  811.93  275.98   1-0.99366-0.87091 0.43300-0.48237-0.43679-0.98763
   0  -4  -2  872.80  318.31   1-0.89670-1.01945-0.49397 0.42140-0.97613-0.42529
   0  -4  -332999.88 2222.80   1-0.42493-0.48788-0.80491 0.26286 0.42493 1.05472
   0   4   330271.17 2307.44   1-0.88984-0.82689 0.25997-0.80780 0.88984 0.26005
   0   4   329656.37 2167.72   1-0.96672-0.90445 0.60255-0.46468-0.33231-0.96123
   0  -4  -329459.64 2055.61   1-0.65249-0.71476-0.40450 0.66272-1.06210-0.43319
   0   4   331406.47 2100.27   1-0.48251-0.41998 0.70923-0.35723-0.48251-1.11211
   0  -4  -329717.61 1760.18   1-0.94058-1.00311-0.47237 0.59409-0.94058-0.31098
   0   4   330724.19 2477.21   1-0.98512-0.92303 0.59747-0.46920-0.32240-0.95103
   0  -4  -4 1019.51  341.05   1-0.42706-0.42936-0.80149 0.41782 0.42706 1.13486
   0   4   4  863.49  420.25   1-0.93876-0.93646 0.46354-0.75574 0.93876 0.23097
   0   4   4  831.34  331.89   1-0.98414-0.98254 0.74138-0.47717-0.20612-0.91283
   0   4   4  850.28  350.24   1-0.42808-0.42618 0.79984-0.41805-0.42808-1.13568
   0  -4  -4  819.41  319.60   1-0.93967-0.94157-0.46794 0.74996-0.93967-0.23206
   0   4   4  782.45  281.60   1-0.97022-0.96855 0.74352-0.47451-0.21551-0.92202
   0  -4  -519373.86 1602.14   1-0.41495-0.35659-0.82086 0.54994 0.41495 1.20074
   0   4   518263.21 1688.30   1-0.99329-1.05236 0.87299-0.49689-0.07923-0.86374
   0   4   518135.82 1778.26   1-0.37503-0.43376 0.88286-0.48649-0.37503-1.16066
   0  -4  -6  521.10  277.83   1-0.39054-0.27153-0.85910 0.66321 0.39054 1.25434
   0   4   6  456.93  322.15   1-0.99428-1.11403 0.99774-0.52348 0.04864-0.81367
   0   4   6  405.75  234.45   1-0.32220-0.44156 0.96076-0.56003-0.32220-1.18584
   0   4   6  446.61  349.05   1-0.92547-1.04507 0.99803-0.52278-0.01560-0.87771
   0  -5  11 1096.39  412.30   1-0.07587-1.04831 1.26785 0.36716-0.07587-0.43953
   0  -5  1016311.96 1845.07   1-0.09494-1.00674 1.24717 0.49792-0.09494-0.38059
   0  -5  1013357.05 1665.28   1-0.16923-1.08080 1.88356 1.13529 1.11609 0.83226
   0   5  -922090.22 1896.05   1-0.96102-0.10838 1.27841 1.87421 0.96102 1.16691
   0  -5   920873.80 2124.91   1-0.10456-0.95573 1.23654 0.63873-0.10456-0.31220
   0  -5   916687.80 1828.95   1-0.11779-0.96872 1.87985 1.28295 1.15101 0.94497
   0   5  -8 1799.55  509.59   1 0.13501 0.92640-1.46349-1.01796-0.13501-0.00570
   0   5  -8 1577.78  436.89   1-0.88862-0.09679 1.46529 1.90966 0.88862 1.01662
   0  -5   8 1623.37  447.17   1-0.10056-0.89111 1.24097 0.79461-0.10056-0.23019
   0   5  -8 1731.30  484.98   1-0.74813 0.04240 0.16237 0.60873-0.74813-0.61851
   0  -5   8 1217.03  484.10   1-0.02758-0.81789 1.86114 1.41563 1.20421 1.07597
   0   5  -720112.53 1497.97   1 0.08435 0.81509-1.42205-1.12804-0.08435-0.03305
   0   5  -718080.00 1600.87   1-0.77408-0.04307 1.59451 1.88747 0.77408 0.82420
   0   5  -712414.17 1712.74   1-0.73599-0.00602 1.62027 1.91448 0.94666 0.99761
   0   5  -716088.82 1458.41   1-0.50453 0.22555-0.69170-0.39887-1.21262-1.16240
   0  -5   719705.67 1509.66   1-0.07532-0.80524 1.26844 0.97351-0.07532-0.12694
   0   5  -719244.24 1602.15   1-0.70838 0.02153 0.25868 0.55359-0.70838-0.65676
   0  -5   716637.98 1948.88   1 0.11266-0.61700 1.80170 1.50758 1.26697 1.21652
   0   5  -712074.07 1865.04   1-0.82061-0.09093 1.32948 1.62359 0.27858 0.32901
   0   5  -648223.50 2854.46   1 0.01058 0.68066-1.35540-1.21288-0.01058-0.03728
   0   5  -644224.42 2475.66   1-0.62176 0.04843 1.65216 1.79370 0.62176 0.59398
   0   5  -642488.56 3256.34   1-0.41716 0.25216 1.63557 1.77833 1.27730 1.25039
   0   5  -649136.78 2557.02   1-0.55158 0.11783-0.60635-0.46486-1.17093-1.19851
   0  -5   649995.79 2877.96   1-0.01363-0.68292 1.33190 1.18841-0.01363 0.01275
   0   5  -646184.04 2728.45   1-0.66203 0.00725 0.36315 0.50662-0.66203-0.68843
   0   5  -640054.79 2316.08   1-0.30537 0.36367-1.65792-1.51618-1.31234-1.33971
   0   5  -530821.46 1816.57   1-0.08458 0.52484-1.25847-1.26745 0.08458-0.02012
   0   5  -530151.74 1760.66   1-0.44419 0.16517 1.63376 1.62390 0.44419 0.33853
   0   5  -530742.48 1902.38   1-0.09517 0.51352 1.44700 1.43828 1.40051 1.29572
   0   5  -527523.23 1747.27   1-0.61015-0.00140-0.49260-0.50246-1.11129-1.21668
   0  -5   526628.03 2276.03   1 0.11770-0.49095 1.44973 1.45771 0.11770 0.22211
   0   5  -526905.52 2124.07   1-0.60358 0.00507 0.48497 0.47700-0.60358-0.70799
   0   5  -525962.92 2084.81   1-0.29359 0.31481 1.87084 1.86217 1.01741 0.91225
   0   5  -432262.23 1984.08   1-0.19654 0.35222-1.12842-1.28894 0.19654 0.01383
   0   5  -430608.97 1615.14   1-0.26056 0.28799 1.55054 1.38925 0.26056 0.07702
   0   5  -425201.92 1884.62   1 0.16299 0.71106 1.18801 1.02783 1.38795 1.20530
   0   5  -430825.39 1897.67   1-0.67230-0.12423-0.36134-0.52253-1.03709-1.22028
   0   5  -427153.46 1831.17   1-0.51592 0.03211 0.65067 0.49128-0.51592-0.69833
   0   5  -420293.36 2119.18   1-0.39345 0.15441-1.61650-1.77622-0.39345-0.57621
   0   5  -433806.67 2041.12   1 0.09627 0.64405 1.81056 1.65050 1.26089 1.07792
   0   5  -424973.58 1733.56   1-0.71177-0.16404-1.04942-1.21026-1.20720-1.39014
   0   5  -357297.30 2161.97   1-0.31803 0.17008-0.96671-1.27873 0.31803 0.05732
   0   5  -356745.15 2554.94   1-0.73293-0.24554-0.22039-0.53291-0.95139-1.21238
   0  -5   360292.78 2622.59   1-0.34482-0.83222-0.94812-0.63561-1.31974-1.05876
   0   5  -340879.09 3082.79   1-0.86832-0.38108-1.49730-1.80841-0.86832-1.12901
   0   5  -356173.45 2981.12   1-0.84331-0.35624-0.69274-1.00488-1.06810-1.32884
   0  -5   358737.76 2809.12   1-0.42124-0.90831-1.53325-1.22113-1.31447-1.05375
   0  -5   236058.81 2251.32   1-0.05279-0.48025-1.29221-0.82868 0.05279 0.39151
   0   5  -232325.25 1817.68   1-0.44069-0.01323-0.77935-1.24289 0.44069 0.10198
   0   5  -233243.83 2082.30   1-0.78908-0.36236-0.07519-0.53904-0.85687-1.19566
   0  -5   236256.42 1810.91   1-0.46303-0.88975-0.76302-0.29917-1.24530-0.90651
   0   5  -226210.51 2316.84   1-0.91590-0.48912-0.36155-0.82384-0.91590-1.25434
   0   5  -234129.62 2034.72   1-0.92220-0.49579-0.37779-0.84121-0.91823-1.25674
   0  -5   234393.04 1987.84   1-0.62848-1.05490-1.21981-0.75639-1.25880-0.92028
   0  -5   110101.43  905.52   1-0.16398-0.53079-1.16804-0.55301 0.16398 0.58070
   0   5  -1 9101.94 1081.59   1-0.55712-0.19031-0.57510-1.19015 0.55712 0.14040
   0   5  -1 9335.16 1023.75   1-0.83919-0.47315 0.07070-0.54449-0.75568-1.17227
   0   5  -1 8614.58  904.97   1-0.71888-0.35273 0.23389-0.37983-0.71888-1.13532
   0  -5   1 7664.50 1050.91   1-0.89930-1.26529-1.44603-0.83216-0.89930-0.48274
   0   5  -1 9318.95 1006.99   1-0.96573-0.59998-0.11294-0.72766-0.77562-1.19193
   0  -5   110739.68 1409.11   1-0.74601-1.11177-0.96896-0.35425-1.17914-0.76284
   0  -5   096505.54 4199.83   1-0.24438-0.55053-1.06740-0.30083 0.24438 0.73910
   0   5   086140.07 4118.47   1-0.88256-0.57719 0.21507-0.55146-0.64940-1.14379
   0  -5   086397.96 3970.88   1-0.57934-0.88471-0.55354 0.21298-1.14380-0.64941
   0   5   085089.83 3921.75   1-0.61752-0.31200 0.45680-0.30836-0.61752-1.11198
   0  -5   089223.10 3997.21   1-0.99298-1.29834-1.04428-0.27904-0.99298-0.49849
   0   5   087427.77 4072.00   1-0.98723-0.68214 0.11038-0.65563-0.64434-1.13843
   0  -5   095996.48 5089.89   1-0.81037-1.11546-0.79587-0.02986-1.11202-0.61793
   0  -5  -1 2303.91  459.85   1-0.29814-0.54364-0.99473-0.07666 0.29814 0.87087
   0   5   1 1857.20  509.75   1-0.75295-0.50746-0.15022-1.06828 0.75295 0.18023
   0   5   1 1800.34  461.38   1-0.91892-0.67422 0.35656-0.56128-0.53917-1.11135
   0  -5  -1 2231.28  507.77   1-0.60078-0.84548-0.51140 0.40645-1.12145-0.54927
   0   5   1 2058.46  470.54   1-0.54777-0.30288 0.59259-0.32402-0.54777-1.12023
   0  -5  -1 1872.00  475.29   1-0.98888-1.23362-0.81004 0.10658-0.98888-0.41645
   0   5   1 2129.82  431.78   1-0.99465-0.75021 0.30253-0.61476-0.52333-1.09520
   0  -5  -2 6886.98  876.33   1-0.32995-0.51480-0.94961 0.11996 0.32995 0.98068
   0   5   2 5981.76 1131.81   1-0.82865-0.64381 0.05788-1.01169 0.82865 0.17792
   0   5   2 6140.22  927.08   1-0.94823-0.76421 0.49441-0.57478-0.42574-1.07573
   0   5   2 6960.30  927.21   1-0.48906-0.30480 0.69793-0.37010-0.48906-1.13953
   0  -5  -2 6644.71  918.42   1-0.97692-1.16103-0.69147 0.37655-0.97692-0.32655
   0   5   2 7109.69  950.69   1-0.99241-0.80863 0.47164-0.59695-0.41047-1.06013
   0  -5  -3  914.34  344.40   1-0.34383-0.46801-0.92942 0.29167 0.34383 1.07256
   0   5   3  911.05  328.92   1-0.97049-0.84714 0.62814-0.59240-0.30960-1.03740
   0   5   3 1010.62  419.91   1-0.43474-0.31110 0.78906-0.43043-0.43474-1.16322
   0  -5  -3 1104.96  401.63   1-0.96974-1.09337-0.63849 0.58101-0.96974-0.24125
   0   5   3 1081.00  338.53   1-0.98299-0.85988 0.62349-0.59639-0.30374-1.03119
   0  -5  -434823.16 2497.39   1-0.34279-0.40632-0.93094 0.44166 0.34279 1.14953
   0   5   431922.73 2375.85   1-0.98566-0.92299 0.75747-0.61439-0.19101-0.99660
   0   5   431282.87 2447.76   1-0.38207-0.31907 0.87213-0.49881-0.38207-1.18858
   0   5   432903.51 2164.83   1-0.96781-0.90509 0.76196-0.60918-0.20163-1.00697
   0  -5  -511368.15 1337.38   1-0.32889-0.33177-0.95115 0.57296 0.32889 1.21363
   0   5   510220.87 1275.40   1-0.99364-0.99164 0.88218-0.64100-0.07008-0.95347
   0   5   5 9828.78 1295.25   1-0.32971-0.32734 0.94996-0.57241-0.32971-1.21422
   0  -6  11 2241.88  756.17   1-0.01671-1.05025 1.32885 0.58121-0.01671-0.28147
   0  -6  10 2108.03  577.02   1-0.02243-0.99534 1.32317 0.72695-0.02243-0.20919
   0  -6  10 1558.95  741.30   1 0.07986-0.89276 1.81891 1.22377 1.25446 1.06947
   0   6  -912712.47 1283.68   1-0.88486 0.02883 1.47163 1.91403 0.88486 0.99173
   0  -6   913556.15 1501.83   1-0.01413-0.92641 1.33140 0.88663-0.01413-0.12288
   0  -6   9 9407.42 1755.39   1 0.16638-0.74560 1.76905 1.32528 1.28450 1.17729
   0   6  -8 6677.31  944.55   1-0.01828 0.83434-1.32730-1.03507 0.01828 0.04864
   0   6  -8 7075.96  979.66   1-0.77958 0.07330 1.59055 1.88153 0.77958 0.80856
   0  -6   8 6611.90 1212.79   1 0.01508-0.83656 1.35968 1.06635 0.01508-0.01564
   0   6  -8 6267.67  950.01   1-0.74560 0.10604 0.16872 0.46206-0.74560-0.71486
   0   6  -8 5450.07  855.37   1-0.28876 0.56262-1.67332-1.38218-1.31040-1.28101
   0   6  -7 5389.89  781.70   1-0.07097 0.72099-1.27308-1.13237 0.07097 0.02333
   0   6  -7 5155.72  717.61   1-0.64590 0.14616 1.64854 1.78810 0.64590 0.59700
   0   6  -7 4832.31 1017.19   1-0.45957 0.33149 1.64759 1.78861 1.24784 1.19998
   0   6  -7 4776.77  732.76   1-0.64641 0.14474-0.41747-0.27796-1.06950-1.11817
   0  -6   7 4773.47  956.99   1 0.07789-0.71312 1.41651 1.27463 0.07789 0.12517
   0   6  -7 4843.04  752.21   1-0.70865 0.08236 0.25804 0.39993-0.70865-0.75592
   0   6  -7 4622.78 1009.47   1-0.65816 0.13255 1.61543 1.75642 0.58464 0.53625
   0   6  -7 3637.97  743.82   1-0.43944 0.35128-1.51075-1.37090-1.31289-1.36128
   0   6  -628567.51 1902.71   1-0.14065 0.59065-1.19554-1.20633 0.14065 0.01501
   0   6  -625811.08 1399.10   1-0.49391 0.23733 1.64595 1.63409 0.49391 0.36712
   0   6  -622146.18 1902.41   1-0.17472 0.55571 1.50814 1.49767 1.38510 1.25935
   0   6  -626223.10 1479.27   1-0.67143 0.05905-0.36327-0.37508-1.03822-1.16468
   0   6  -623915.01 1683.40   1-0.66676 0.06363 0.35282 0.34327-0.66676-0.79205
   0   6  -628731.98 1955.59   1-0.19842 0.53175-1.51031-1.52014-0.19842-0.32417
   0   6  -619709.11 1707.48   1-0.38044 0.34964 1.84241 1.83201 0.93563 0.80944
   0   6  -624398.98 1721.60   1-0.59810 0.13196-1.27456-1.28601-1.27275-1.39892
   0   6  -544908.13 3284.13   1-0.22452 0.44612-1.09313-1.25544 0.22452 0.02088
   0   6  -549973.34 3095.01   1-0.33673 0.33370 1.59186 1.42858 0.33673 0.13205
   0   6  -549454.25 2602.30   1 0.06344 0.73325 1.29882 1.13691 1.40409 1.20050
   0   6  -548290.89 2529.95   1-0.70708-0.03726-0.28226-0.44543-0.98976-1.19403
   0   6  -542465.73 2816.11   1-0.61546 0.05429 0.46100 0.30001-0.61546-0.81876
   0   6  -537241.71 2828.27   1-0.42481 0.24476-1.62773-1.78912-0.42481-0.62853
   0   6  -543084.57 2703.16   1-0.04398 0.62547 1.86567 1.70388 1.19528 0.99129
   0   6  -543496.16 2650.49   1-0.73738-0.06797-0.98992-1.15267-1.18666-1.39063
   0   6  -436058.05 2284.16   1-0.31846 0.29153-0.96610-1.27991 0.31846 0.03681
   0   6  -435497.16 2170.41   1-0.18738 0.42215 1.50258 1.18772 0.18738-0.09531
   0   6  -434578.56 2267.60   1-0.74789-0.13875-0.18328-0.49777-0.92783-1.20989
   0  -6   434228.38 2259.25   1-0.24306-0.85220-1.08859-0.77411-1.36433-1.08227
   0   6  -424271.03 1971.70   1-0.53799 0.07114 0.61067 0.29824-0.53799-0.81930
   0   6  -433760.92 2599.18   1-0.79794-0.18900-1.57601-1.88878-0.79794-1.07959
   0   6  -435746.39 2174.53   1-0.84158-0.23283-0.69845-1.01249-1.07061-1.35237
   0  -6   434322.41 2181.42   1-0.26558-0.87433-1.69379-1.37977-1.30704-1.02529
   0   6  -3   48.27   91.30   1-0.41747 0.13187-0.81684-1.28218 0.41747 0.05782
   0   6  -3   37.04  111.09   1-0.79012-0.24165-0.07236-0.53817-0.85497-1.21483
   0  -6   3   40.57   94.98   1-0.36878-0.91725-0.91262-0.44679-1.30674-0.94687
   0   6  -3   41.91  114.07   1-0.32156 0.22694 0.96167 0.49778-0.32156-0.68088
   0   6  -3   48.01   97.06   1-0.96754-0.41921-0.62362-1.08776-0.96754-1.32712
   0   6  -3   72.96   90.18   1-0.91149-0.36339-0.42888-0.89422-0.94405-1.30360
   0  -6   3   63.41  125.45   1-0.49191-1.03999-1.44091-0.97558-1.30506-0.94551
   0  -6   220659.12 1552.02   1-0.05200-0.54070-1.29304-0.67618 0.05200 0.48966
   0   6  -218337.34 1457.32   1-0.51646-0.02777-0.64971-1.26655 0.51646 0.07880
   0   6  -218208.87 1574.20   1-0.83120-0.34340 0.04614-0.57102-0.77315-1.21081
   0  -6   219318.89 1571.84   1-0.45343-0.94122-0.77901-0.16186-1.25233-0.81467
   0   6  -211625.19 1641.92   1-0.70539-0.21751 0.26565-0.34966-0.70539-1.14271
   0   6  -219352.66 1430.69   1-0.95509-0.46766-0.19013-0.80676-0.81867-1.25601
   0  -6   220180.24 1775.30   1-0.63799-1.12542-1.20192-0.58530-1.25393-0.81660
   0  -6   169815.96 3072.25   1-0.13573-0.56377-1.20123-0.43288 0.13573 0.65139
   0   6  -167064.12 3200.14   1-0.61104-0.18300-0.46997-1.23833 0.61104 0.09537
   0   6  -172234.71 2736.21   1-0.86941-0.44229 0.16904-0.59945-0.68395-1.19941
   0   6  -166321.44 2829.98   1-0.59535-0.16810 0.50133-0.26542-0.59535-1.11069
   0  -6   161005.20 3423.45   1-0.87752-1.30457-1.48347-0.71655-0.87752-0.36206
   0   6  -171773.78 3081.37   1-0.98017-0.55339 0.01975-0.74817-0.69882-1.21395
   0  -6   176209.93 3462.18   1-0.72703-1.15380-1.01443-0.24652-1.19526-0.68014
   0  -6   0 4453.95  705.87   1-0.19659-0.56397-1.12836-0.20849 0.19659 0.79025
   0   6   0 3977.38  669.34   1-0.69789-0.33051-0.28300-1.20286 0.69789 0.10423
   0   6   0 4042.66  632.06   1-0.90363-0.53718 0.29407-0.62577-0.58861-1.18188
   0   6   0 3729.99  687.57   1-0.53003-0.16340 0.62523-0.29297-0.53003-1.12337
   0  -6   0 3344.72  778.92   1-0.98064-1.34707-1.17621-0.25793-0.98064-0.38725
   0   6   0 4454.81  740.36   1-0.99221-0.62610 0.20584-0.71335-0.58516-1.17806
   0  -6   0 4656.98  778.95   1-0.77997-1.14609-0.88164 0.03755-1.14637-0.55347
   0  -6  -1 6125.42  781.30   1-0.23726-0.54399-1.07668-0.00531 0.23726 0.90893
   0   6   1 5722.47  803.66   1-0.47574-0.16975 0.72081-0.34883-0.47574-1.14710
   0  -6  -1 5774.90  941.01   1-0.99484-1.30065-0.97367 0.09601-0.99484-0.32351
   0   6   1 6007.09  824.47   1-0.99473-0.68928 0.37311-0.69739-0.47697-1.14766
   0  -6  -2 1155.06  396.44   1-0.26058-0.50665-1.04595 0.17692 0.26058 1.01025
   0   6   2 1162.22  355.26   1-0.95728-0.71218 0.54434-0.67815-0.38310-1.13197
   0   6   2 1167.90  355.45   1-0.42490-0.17954 0.80495-0.41613-0.42490-1.17428
   0  -6  -2 1206.96  491.72   1-0.99204-1.23722-0.85912 0.36194-0.99204-0.24278
   0   6   2 1229.16  403.18   1-0.98989-0.74510 0.52550-0.69629-0.37321-1.12169
   0  -6  -3 8505.24 1042.42   1-0.26899-0.45440-1.03468 0.33973 0.26899 1.09667
   0   6   3 7780.31  990.81   1-0.97580-0.79137 0.66752-0.70629-0.27417-1.10083
   0   6   3 7949.24  945.50   1-0.37493-0.19019 0.88302-0.48950-0.37493-1.20230
   0  -6  -3 7126.17 1312.77   1-0.98820-1.17275-0.80126 0.57120-0.98820-0.16100
   0   6   3 7797.39  961.28   1-0.97903-0.79489 0.66601-0.70706-0.27289-1.09915
   0  -6  -4  101.92  137.33   1-0.26436-0.38912-1.04091 0.48502 0.26436 1.17005
   0   6   4  100.35  155.23   1-0.98828-0.86453 0.78840-0.73678-0.16165-1.06613
   0   6   4  119.01  148.93   1-0.96293-0.83917 0.79677-0.72751-0.17519-1.07937
   0  -7  11 2026.80  691.63   1 0.06226-1.03236 1.40286 0.80827 0.06226-0.10360
   0  -7  10  370.64  266.92   1 0.07406-0.95994 1.41320 0.97003 0.07406-0.01380
   0   7  -923880.82 2289.21   1-0.79413 0.18062 1.57921 1.86820 0.79413 0.80198
   0  -7   922077.04 2216.01   1 0.10623-0.86714 1.44039 1.14866 0.10623 0.09638
   0   7  -8 8303.37 1069.42   1-0.14672 0.76713-1.18845-1.04954 0.14672 0.07814
   0   7  -8 9025.85 1130.82   1-0.67581 0.23813 1.64155 1.77913 0.67581 0.60577
   0  -7   8 8092.95 1316.45   1 0.16935-0.74340 1.48957 1.34926 0.16935 0.23750
   0   7  -7  104.57  141.60   1-0.19737 0.65582-1.12738-1.13998 0.19737 0.05079
   0   7  -7   71.97  108.92   1-0.54298 0.31014 1.65293 1.63910 0.54298 0.39506
   0   7  -7   71.00  136.24   1-0.73062 0.12162-0.22606-0.23984-0.95496-1.10249
   0   7  -7   73.35  126.55   1-0.28206 0.56983-1.56312-1.57478-0.28206-0.42881
   0   7  -7   82.62  121.79   1-0.67282 0.17892-1.13312-1.14649-1.23397-1.38119
   0   7  -644899.51 2365.28   1-0.26061 0.53192-1.04592-1.21002 0.26061 0.03602
   0   7  -646399.72 2291.09   1-0.40532 0.38698 1.62095 1.45571 0.40532 0.17952
   0   7  -644501.93 2779.49   1-0.03302 0.75851 1.39308 1.22943 1.40619 1.18163
   0   7  -640504.08 2017.69   1-0.74678 0.04477-0.18606-0.35119-0.92961-1.15495
   0   7  -644782.14 2375.87   1-0.47564 0.31563-1.64205-1.80510-0.47564-0.70032
   0   7  -639227.42 2867.95   1-0.17363 0.61750 1.88364 1.72012 1.11294 0.88792
   0   7  -643229.11 2409.79   1-0.77345 0.01762-0.89906-1.06372-1.15309-1.37810
   0   7  -5   35.20   89.92   1-0.33377 0.39811-0.94410-1.25973 0.33377 0.03117
   0   7  -5   74.67  123.18   1-0.27233 0.45916 1.55752 1.24087 0.27233-0.03135
   0   7  -5   20.29   84.54   1 0.14314 0.87405 1.21123 0.89610 1.39233 1.08990
   0   7  -5   71.44  102.21   1-0.77167-0.04078-0.12201-0.43846-0.88803-1.19116
   0   7  -5   18.94   66.96   1-0.67613 0.05473 0.33215 0.01813-0.67613-0.97832
   0   7  -5   19.72   94.63   1-0.77717-0.04652-1.59231-1.90675-0.77717-1.07980
   0   7  -5   32.19   99.61   1 0.11590 0.84641 1.79988 1.48497 1.26812 0.96530
   0   7  -5   34.28   91.28   1-0.85290-0.12247-0.66033-0.97626-1.05375-1.35653
   0  -7   4 3246.69  705.43   1 0.15172-0.51951-1.47638-1.00926-0.15172 0.22887
   0   7  -4 3160.16  643.95   1-0.41358 0.25764-0.82303-1.29015 0.41358 0.03299
   0   7  -4 3380.68  568.40   1-0.80143-0.13121-0.04090-0.50868-0.83365-1.21458
   0  -7   4 3395.57  702.18   1-0.27478-0.94500-1.04654-0.57875-1.35223-0.97129
   0   7  -4 2078.33  754.64   1-0.68179-0.01153 0.31953-0.14596-0.68179-1.06201
   0   7  -4 1465.22  813.87   1-0.98876-0.31873-0.80851-1.27435-0.98876-1.36933
   0   7  -4 2656.52  598.00   1-0.91061-0.24085-0.43287-0.90012-0.94605-1.32663
   0  -7   4 2690.98  554.05   1-0.35119-1.02095-1.61233-1.14509-1.31562-0.93504
   0   7  -3 5437.17  951.69   1-0.49654 0.11402-0.68494-1.30357 0.49654 0.03794
   0   7  -3 6546.12  847.74   1-0.83325-0.22370 0.05239-0.56674-0.76872-1.22747
   0  -7   3 6573.74  820.67   1-0.36825-0.97779-0.91341-0.29429-1.30703-0.84829
   0   7  -3 6129.65  812.73   1-0.94999-0.34088-0.22337-0.84189-0.83683-1.29519
   0  -7   3 6855.38  902.70   1-0.51857-1.12767-1.40247-0.78396-1.29913-0.84077
   0  -7   2  432.55  196.03   1-0.03589-0.58581-1.30959-0.53943 0.03589 0.57250
   0   7  -2  419.84  210.41   1-0.86505-0.31618 0.15425-0.61619-0.69492-1.23145
   0   7  -2  304.96  253.90   1-0.47403 0.07495 0.72373-0.04465-0.47403-1.01027
   0   7  -2  456.16  249.65   1-0.97507-0.42662-0.03239-0.80221-0.72942-1.26557
   0  -7   2  475.82  285.19   1-0.63014-1.17859-1.21671-0.44689-1.25796-0.72181
   0  -7   1   12.32   82.36   1-0.10075-0.59001-1.24076-0.31910 0.10075 0.71535
   0   7  -1   51.55   98.30   1-0.89530-0.40711 0.26199-0.65980-0.61352-1.22785
   0  -7   1    2.81   67.15   1-0.83473-1.32287-1.54011-0.62014-0.83473-0.22037
   0   7  -1    4.01   69.54   1-0.98916-0.50137 0.14199-0.77913-0.62495-1.23889
   0  -7   074124.82 3518.30   1-0.14760-0.57621-1.18742-0.11425 0.14760 0.84021
   0   7   078407.05 3203.03   1-0.92286-0.49533 0.37350-0.69964-0.52556-1.21771
   0  -7   063334.67 3753.40   1-0.95460-1.38211-1.30315-0.23180-0.95460-0.26230
   0   7   073994.30 3430.04   1-0.99464-0.56751 0.30230-0.77010-0.52348-1.21520
   0  -7  -123037.14 2052.98   1-0.17824-0.54620-1.15087 0.07382 0.17824 0.94886
   0  -7  -120531.44 2024.54   1-0.98658-1.35346-1.12853 0.09421-0.98658-0.21635
   0   7   123521.06 1948.22   1-0.99314-0.62667 0.45087-0.77282-0.42466-1.19417
   0  -7  -2   92.69  155.14   1-0.19448-0.50178-1.13096 0.24523 0.19448 1.04310
   0   7   2  345.12  192.69   1-0.96660-0.66042 0.60172-0.77409-0.33305-1.18079
   0   7   2  109.27  156.03   1-0.98572-0.67991 0.58965-0.78531-0.32798-1.17526
   0  -7  -323774.54 2066.88   1-0.19785-0.44450-1.12679 0.40093 0.19785 1.12448
   0   7   323038.60 1581.22   1-0.98154-0.73604 0.71615-0.81098-0.22961-1.15515
   0   7   325060.79 1635.16   1-0.97309-0.72793 0.72019-0.80610-0.23294-1.15803
   0   8  -916379.70 1382.72   1-0.70907 0.32674 1.63013 1.76575 0.70907 0.61791
   0   8  -8 6771.47  866.68   1-0.59136 0.38364 1.65435 1.63854 0.59136 0.42231
   0   8  -7 2313.33  545.62   1-0.46890 0.44528 1.64044 1.47321 0.46890 0.22196
   0   8  -7 2678.46  567.30   1-0.78884 0.12446-0.07585-0.24293-0.85731-1.10372
   0   8  -630635.05 2208.17   1-0.34899 0.50437 1.59763 1.27899 0.34899 0.02416
   0   8  -632028.46 2204.91   1 0.04520 0.89785 1.31763 1.00076 1.40551 1.08212
   0   8  -634164.91 1911.10   1-0.80091 0.05172-0.04236-0.36078-0.83464-1.15885
   0   8  -627933.08 1921.95   1-0.87319-0.02108-0.58739-0.90526-1.02051-1.34433
   0   8  -511089.19 1181.04   1-0.23773 0.55482 1.53642 1.06638 0.23773-0.16498
   0   8  -511663.22 1041.79   1-0.81987-0.02790 0.01224-0.45751-0.79698-1.19898
   0   8  -510701.79 1154.90   1-0.91789-0.12644-0.39883-0.86796-0.92893-1.33053
   0  -8   510588.21 1191.10   1-0.20914-1.00080-1.73904-1.26963-1.29582-0.89414
   0   8  -4  864.16  304.19   1-0.84296-0.11167 0.08246-0.53863-0.74725-1.22706
   0   8  -4  847.28  335.10   1-0.95065-0.21986-0.21922-0.83965-0.83458-1.31397
   0  -8   4  807.30  315.90   1-0.39121-1.12199-1.56859-0.94816-1.31592-0.83652
   0  -8   318565.36 1562.69   1 0.05655-0.61524-1.39780-0.62586-0.05655 0.50098
   0   8  -320898.92 1548.17   1-0.86804-0.19742 0.16436-0.60807-0.68743-1.24505
   0   8  -320945.84 1470.62   1-0.97318-0.30305-0.05005-0.82177-0.73966-1.29683
   0  -8   321850.30 1791.48   1-0.52196-1.19210-1.39743-0.62571-1.29829-0.74110
   0  -8   225581.01 1561.54   1-0.01021-0.62137-1.33528-0.41180 0.01021 0.64576
   0   8  -224129.34 1628.77   1-0.89343-0.28349 0.25494-0.66881-0.61895-1.25436
   0  -8   216708.49 2396.12   1-0.28691-0.89679-1.56587-0.64417-0.28691 0.34845
   0   8  -223860.84 1566.28   1-0.98713-0.37766 0.10889-0.81414-0.64525-1.28022
   0  -8   127599.45 1939.10   1-0.06119-0.61169-1.28342-0.20846 0.06119 0.77474
   0   8  -127081.43 2042.70   1-0.91782-0.36855 0.35189-0.72320-0.54290-1.25611
   0   8  -128343.02 2139.06   1-0.99387-0.44506 0.25848-0.81584-0.55174-1.26450
   0  -8   0  339.76  259.11   1-0.09735-0.58719-1.24452-0.01802 0.09735 0.88891
   0   8   0  427.07  198.70   1-0.94016-0.45156 0.45337-0.77306-0.46015-1.25118
   0   8   0  371.01  220.69   1-0.99439-0.50624 0.39976-0.82583-0.45919-1.24972
   0  -8  -1  621.82  364.18   1-0.11992-0.54911-1.21931 0.15870 0.11992 0.98948
   0   8   1  642.22  325.45   1-0.98943-0.56194 0.53373-0.84316-0.36746-1.23579
   0  -8  -2 4809.71  846.94   1-0.13008-0.49860-1.20772 0.32178 0.13008 1.07764
   0   8   2 5279.61  871.83   1-0.97537-0.60813 0.66420-0.86490-0.27718-1.22380
   0   8   2 5311.04  790.78   1-0.97950-0.61267 0.66124-0.86693-0.27637-1.22248
   0   9  -916613.77 1560.59   1-0.63899 0.45788 1.64975 1.63198 0.63899 0.44881
   0   9  -8 9523.39 1033.65   1-0.52887 0.50718 1.65146 1.48227 0.52887 0.26080
   0   9  -7 4706.66  721.99   1-0.41980 0.55544 1.62606 1.30544 0.41980 0.07384
   0   9  -7 4842.49  728.20   1-0.83330 0.14108 0.05255-0.26783-0.76860-1.11389
   0   9  -644605.66 3288.44   1-0.31681 0.59762 1.58194 1.10990 0.31681-0.10703
   0   9  -649348.49 3054.80   1-0.84308 0.07062 0.08285-0.38888-0.74697-1.17006
   0   9  -510754.22 1164.47   1-0.22368 0.62993 1.52735 0.90389 0.22368-0.27805
   0   9  -510509.43 1195.19   1-0.85828-0.00524 0.13171-0.49134-0.71151-1.21240
   0   9  -511118.24 1417.66   1-0.95622-0.10375-0.18247-0.80482-0.81445-1.31488
   0  -9   510017.70 1304.84   1-0.25831-1.11078-1.70000-1.07765-1.30584-0.80541
   0   9  -414613.22 1466.03   1-0.87683-0.08446 0.19473-0.57966-0.66474-1.24343
   0   9  -413777.53 1187.40   1-0.97461-0.18281-0.03672-0.81037-0.73194-1.31016
   0  -9   3 2216.59  564.39   1 0.07561-0.65742-1.41453-0.48928-0.07561 0.58087
   0   9  -3 2393.23  490.27   1-0.89707-0.16538 0.26871-0.65701-0.60832-1.26481
   0   9  -3 2239.29  518.57   1-0.98683-0.25568 0.10434-0.82059-0.64802-1.30402
   0  -9   217215.52 1367.94   1 0.02203-0.65034-1.36622-0.28945-0.02203 0.71245
   0   9  -217017.98 1296.93   1-0.91764-0.24663 0.35113-0.72592-0.54351-1.27780
   0   9  -218176.74 1340.36   1-0.99339-0.32290 0.24048-0.83574-0.56323-1.29701
   0  -9   1 9302.89  977.55   1-0.01818-0.62990-1.32740-0.09911 0.01818 0.83067
   0   9  -110140.16 1148.61   1-0.93741-0.32707 0.44002-0.78838-0.47123-1.28332
   0   9  -110469.82 1087.34   1-0.99475-0.38492 0.37174-0.85577-0.47788-1.28945
   0  -9   0   31.45  126.15   1-0.04577-0.59684-1.29949 0.08032 0.04577 0.93627
   0   9   0   35.68  140.09   1-0.95543-0.40576 0.53372-0.84603-0.39225-1.28215
   0   9   0   30.36  135.20   1-0.99127-0.44211 0.49831-0.88050-0.39210-1.28146
   0  10  -9 3809.10  728.41   1-0.58607 0.57187 1.65448 1.48329 0.58607 0.29686
   0  10  -8 4028.17  822.10   1-0.48623 0.61088 1.64440 1.32179 0.48623 0.11914
   0  10  -7  338.75  227.72   1-0.39057 0.64573 1.61539 1.14137 0.39057-0.05440
   0  10  -7  372.51  238.54   1-0.86925 0.16621 0.16848-0.30522-0.68437-1.12854
   0  10  -610597.84 1295.48   1-0.30244 0.67304 1.57438 0.94896 0.30244-0.22041
   0  10  -611457.10 1039.44   1-0.87751 0.09727 0.19712-0.42791-0.66295-1.18491
   0  10  -5   21.01  115.03   1-0.22420 0.69047 1.52769 0.75086 0.22420-0.37654
   0  10  -5   62.64  109.22   1-0.89001 0.02410 0.24219-0.53418-0.62874-1.22851
   0  10  -416110.40 1353.99   1-0.90517-0.05173 0.30015-0.62755-0.58385-1.26142
   0  10  -416381.12 1259.20   1-0.98825-0.13542 0.12647-0.80036-0.63449-1.31152
   0 -10   3 8103.18  902.51   1 0.10231-0.69195-1.43715-0.35858-0.10231 0.65312
   0  10  -3 8734.17  993.23   1-0.92166-0.12889 0.36830-0.71073-0.52975-1.28512
   0  10  -3 8577.11 1109.60   1-0.99357-0.20141 0.24707-0.83107-0.55903-1.31385
   0 -10   2    5.30  113.23   1 0.05920-0.67440-1.40016-0.17008-0.05920 0.77423
   0  10  -2   30.83  148.74   1-0.93835-0.20625 0.44453-0.78585-0.46750-1.30068
   0  10  -2   18.55  116.49   1-0.99479-0.26328 0.36615-0.86328-0.48159-1.31420
   1  10  -3 2729.89  576.58   1-0.96487-0.20256 0.59052-0.54288-0.34290-1.22115
   1  10  -3 2409.70  605.13   1-0.98829-0.22663 0.55270-0.57969-0.35415-1.23176
   1  10  -4   18.94  126.77   1-0.23915 0.58424 1.53733 0.55494 0.23915-0.56227
   1  10  -4   23.95  104.88   1-0.95608-0.13309 0.53742-0.44466-0.38907-1.18952
   1  10  -5   77.28  140.42   1-0.29784 0.58636 1.57191 0.74093 0.29784-0.42570
   1  10  -5   69.71  135.46   1-0.94840-0.06474 0.49528-0.33546-0.42501-1.14765
   1  10  -619305.06 1899.13   1-0.36596 0.57906 1.60524 0.92569 0.36596-0.27969
   1  10  -619395.15 1502.28   1-0.94294 0.00138 0.46720-0.21219-0.44862-1.09345
   1  10  -7   35.56  111.83   1-0.44214 0.56370 1.63317 1.10502 0.44214-0.12563
   1  10  -8  230.45  210.23   1-0.52433 0.54233 1.65090 1.27419 0.52433 0.03444
  -1  -9   1  155.11  188.57   1 0.08686-0.49456-1.42419-0.14176-0.08686 0.84848
   1   9  -1   94.57  155.42   1-0.97425-0.39436 0.65556-0.62719-0.28499-1.21995
   1   9  -1   92.89  134.62   1-0.98083-0.40151 0.64748-0.63428-0.28639-1.22074
  -1  -9   2 1408.41  515.25   1 0.12261-0.51947-1.45368-0.32275-0.12261 0.73473
   1   9  -2 1444.99  432.82   1-0.96380-0.32324 0.58371-0.54772-0.34888-1.20605
   1   9  -2 1595.25  468.06   1-0.98856-0.34858 0.54837-0.58212-0.35720-1.21378
  -1  -9   317075.53 1578.69   1 0.17021-0.53252-1.49018-0.51077-0.17021 0.60912
   1   9  -319151.42 1487.77   1-0.95281-0.25157 0.51907-0.46101-0.40479-1.18414
   1   9  -319913.15 1416.87   1-0.99319-0.29255 0.44919-0.52999-0.42580-1.20458
   1   9  -424158.39 1643.96   1-0.22952 0.53281 1.53115 0.70216 0.22952-0.47289
   1   9  -426312.41 1608.75   1-0.94228-0.18037 0.46387-0.36488-0.45140-1.15296
   1   9  -425829.74 1615.26   1-0.99486-0.23356 0.35090-0.47701-0.49167-1.19268
   1   9  -5   62.30  137.50   1-0.30009 0.52306 1.57312 0.89555 0.30009-0.32443
   1   9  -5   48.43  110.23   1-0.93340-0.11081 0.42100-0.25643-0.48691-1.11067
  -1  -9   5   32.77  107.29   1-0.37726-1.19922-1.58427-0.90765-1.31610-0.69287
   1   9  -6 1148.54  419.70   1-0.38049 0.50347 1.61134 1.08519 0.38049-0.16614
   1   9  -6 1247.75  401.75   1-0.92757-0.04431 0.39434-0.13174-0.50869-1.05464
   1   9  -716656.73 1616.12   1-0.46854 0.47624 1.64036 1.26562 0.46854-0.00021
   1   9  -715681.06 1548.10   1-0.92649 0.01743 0.38951 0.01476-0.51261-0.98077
   1   9  -8  235.07  182.06   1-0.56117 0.44443 1.65414 1.43081 0.56117 0.17030
   1   9  -9 4919.26  737.33   1-0.65459 0.41182 1.64682 1.57489 0.65459 0.34161
   1   9 -10 1133.72  367.14   1-0.74455 0.38268 1.61312 1.69264 0.74455 0.50945
  -1  -8  -1 1655.64  482.54   1-0.00001-0.39890-1.34522 0.08695 0.00001 0.99243
   1   8   1 1729.28  436.90   1-0.98599-0.58852 0.76107-0.67105-0.18761-1.17929
   1   8   1 1613.96  443.60   1-0.96554-0.56843 0.77857-0.65201-0.18905-1.18025
  -1  -8   0 2726.49  657.19   1 0.02005-0.43948-1.36435-0.08374-0.02005 0.89434
   1   8   0 2848.06  602.98   1-0.97683-0.51869 0.67572-0.60507-0.26672-1.18061
   1   8   0 2867.33  620.05   1-0.97820-0.52056 0.67413-0.60574-0.26695-1.18028
  -1  -8   153942.57 2763.40   1 0.05281-0.46738-1.39446-0.26535-0.05281 0.78358
   1   8  -155694.25 2783.71   1-0.96547-0.44666 0.59437-0.53509-0.33952-1.17561
   1   8  -155225.23 2850.77   1-0.98731-0.46901 0.56747-0.56111-0.34373-1.17928
  -1  -8   217009.69 1790.82   1 0.09885-0.48200-1.43427-0.45665-0.09885 0.65955
   1   8  -219470.43 1555.84   1-0.95273-0.37325 0.51865-0.45947-0.40514-1.16343
   1   8  -217704.44 1620.34   1-0.99290-0.41394 0.45808-0.51920-0.41974-1.17750
  -1  -8   3 2324.04  450.61   1 0.15845-0.48305-1.48146-0.65536-0.15845 0.52194
   1   8  -3 2238.63  469.47   1-0.93961-0.29944 0.45066-0.37613-0.46241-1.14289
   1   8  -3 1984.84  494.72   1-0.99487-0.35525 0.34595-0.48004-0.49493-1.17490
  -1  -8   3 2358.01  550.92   1-0.63094-1.27056-1.21522-0.38923-1.25756-0.57759
   1   8  -412805.76 1143.94   1-0.23126 0.47001 1.53229 0.85669 0.23126-0.37213
   1   8  -413338.96 1152.20   1-0.92729-0.22645 0.39307-0.28238-0.50972-1.11240
   1   8  -413774.67 1230.80   1-0.99310-0.29282 0.23109-0.44361-0.56920-1.17139
  -1  -8   412988.43 1408.57   1-0.52120-1.22149-1.39856-0.72386-1.29848-0.69629
   1   8  -5  404.10  286.11   1-0.31621 0.44588 1.58163 1.05744 0.31621-0.20930
   1   8  -5  249.28  186.26   1-0.91727-0.15576 0.34957-0.17455-0.54476-1.06965
  -1  -8   5  188.86  218.54   1-0.34154-1.10306-0.95292-0.42880-1.32146-0.79657
   1   8  -5  191.98  149.96   1-0.98744-0.22650 0.11364-0.40977-0.64235-1.16675
  -1  -8   5  174.68  215.60   1-0.35294-1.11389-1.61050-1.08708-1.31569-0.79128
   1   8  -6 2900.68  599.83   1-0.41088 0.41202 1.62296 1.25020 0.41088-0.03673
   1   8  -6 2955.61  536.25   1-0.91143-0.08925 0.32533-0.04746-0.56403-1.01111
  -1  -8   6 2513.13  677.04   1-0.22707-1.04928-1.10920-0.73649-1.36983-0.92281
   1   8  -7  250.07  178.43   1-0.51176 0.37196 1.64910 1.42775 0.51176 0.14202
   1   8  -7  274.56  224.86   1-0.91215-0.02929 0.32828 0.10682-0.56169-0.93098
   1   8  -813511.41 1341.06   1-0.61431 0.33022 1.65292 1.58300 0.61431 0.32246
   1   8  -923696.06 1783.52   1-0.71341 0.29194 1.62833 1.70982 0.71341 0.49945
   1   8 -10  817.05  339.82   1-0.80389 0.26227 1.57085 1.80376 0.80389 0.66781
  -1  -8  10  836.85  411.06   1 0.12344-0.94117 1.45435 1.21823 0.12344 0.25718
  -1  -7  -211713.68 1250.68   1-0.06234-0.33935-1.28221 0.14814 0.06234 1.03382
   1   7   210434.48 1331.46   1-0.98964-0.71393 0.80670-0.62345-0.14409-1.11470
   1   7   211592.90 1219.35   1-0.95806-0.68263 0.82874-0.60011-0.15063-1.12079
  -1  -7  -1 1126.43  379.20   1-0.04742-0.38508-1.29779-0.01894 0.04742 0.94089
   1   7   1 1287.63  359.93   1-0.98135-0.64496 0.71447-0.56434-0.23116-1.12397
   1   7   1 1166.66  425.42   1-0.97294-0.63698 0.72140-0.55655-0.23204-1.12434
  -1  -7   021071.54 1810.96   1-0.01873-0.41705-1.32685-0.19951 0.01873 0.83420
   1   7   019991.00 1878.15   1-0.96999-0.57292 0.62466-0.50283-0.31270-1.12772
  -1  -7   014120.59 2032.01   1-0.98756-1.38451-1.11901 0.00633-0.98756-0.17259
   1   7   019078.04 1733.74   1-0.98412-0.58749 0.61009-0.51656-0.31337-1.12788
  -1  -7   1 8608.50  989.43   1 0.02475-0.43421-1.36877-0.39297-0.02475 0.71270
   1   7  -1 8847.74  877.07   1-0.95630-0.49857 0.53871-0.43743-0.38795-1.12516
   1   7  -1 8533.62  913.96   1-0.99148-0.53420 0.49385-0.48151-0.39518-1.13190
  -1  -7   2 5114.65  823.46   1 0.08386-0.43576-1.42163-0.59733-0.08386 0.57559
   1   7  -2 5173.68  786.06   1-0.94120-0.42279 0.45851-0.36630-0.45587-1.11528
   1   7  -2 5562.73  800.85   1-0.99475-0.47680 0.37172-0.45235-0.47789-1.13682
  -1  -7   2 5619.09  926.39   1-0.73557-1.25352-0.99425-0.17016-1.18820-0.52925
  -1  -7   316072.09 1327.49   1 0.15879-0.42149-1.48171-0.80893-0.15879 0.42266
   1   7  -317374.52 1484.02   1-0.92583-0.34674 0.38657-0.28691-0.51500-1.09660
  -1  -7   317450.49 1415.49   1-0.51415-1.09325-0.67464-0.00116-1.20450-0.62290
   1   7  -317665.96 1502.94   1-0.99344-0.41484 0.24232-0.43047-0.56206-1.14321
  -1  -7   316174.96 1353.53   1-0.65231-1.23091-1.17430-0.50149-1.24616-0.66500
   1   7  -417788.10 1481.75   1-0.24857 0.39164 1.54322 1.02103 0.24857-0.25580
   1   7  -419678.63 1315.27   1-0.91166-0.27190 0.32626-0.19589-0.56329-1.06710
  -1  -7   418709.43 1528.93   1-0.44606-1.08581-0.79116-0.26903-1.25761-0.75381
   1   7  -415624.32 1488.08   1-0.98677-0.34751 0.10349-0.41801-0.64854-1.15191
  -1  -7   419098.72 1575.54   1-0.51385-1.15311-1.40943-0.88794-1.30028-0.79692
   1   7  -5 1549.62  484.52   1-0.35092 0.35010 1.59852 1.22775 0.35092-0.07556
   1   7  -5 1638.67  426.28   1-0.90065-0.20021 0.28245-0.08836-0.59767-1.02367
  -1  -7   5 1493.81  438.15   1-0.34337-1.04381-0.95025-0.57943-1.32051-0.89450
   1   7  -5 1467.03  411.25   1-0.97339-0.27347-0.04808-0.41828-0.73852-1.16410
  -1  -7   5 1340.35  407.30   1-0.28974-0.98966-1.67242-1.30221-1.31052-0.88494
   1   7  -6 2059.44  524.51   1-0.46163 0.30021 1.63860 1.41922 0.46163 0.11302
   1   7  -6 1707.36  476.56   1-0.89544-0.13433 0.26251 0.04302-0.61312-0.96133
  -1  -7   6 1916.93  537.41   1-0.19236-0.95350-1.15263-0.93321-1.38041-1.03226
   1   7  -6 1543.20  513.23   1-0.95092-0.19034-0.21748-0.43639-0.83363-1.18142
   1   7  -7 8427.04  985.01   1-0.57509 0.24757 1.65451 1.58657 0.57509 0.30437
   1   7  -7 7532.20 1086.95   1-0.89970-0.07792 0.27879 0.21063-0.60051-0.87092
   1   7  -8  189.99  175.40   1-0.68488 0.19860 1.63884 1.72229 0.68488 0.49204
  -1  -7   8  102.15  132.38   1 0.07195-0.81031 1.41137 1.32510 0.07195 0.26282
   1   7  -921859.68 1854.99   1-0.78467 0.15962 1.58672 1.82161 0.78467 0.66972
  -1  -7   920261.59 2361.14   1 0.00741-0.93547 1.35236 1.11465 0.00741 0.12027
   1   7 -10 2798.40  585.67   1-0.86905 0.13606 1.49624 1.88255 0.86905 0.83199
  -1  -7  10 2483.80  666.92   1-0.02087-1.02438 1.32472 0.93556-0.02087 0.01397
  -1  -7  11 3837.82  843.26   1-0.02755-1.09169 1.31804 0.77744-0.02755-0.07071
  -1  -6  -4 1572.33  473.64   1-0.11884-0.21330-1.22054 0.35953 0.11884 1.14737
   1   6   4 1707.59  459.90   1-0.99480-0.90150 0.96795-0.61156 0.01736-1.00997
   1   6   4 1562.67  622.51   1-0.92530-0.83219 0.99876-0.57974-0.01500-1.04192
  -1  -6  -3   24.86  115.36   1-0.12390-0.27902-1.21480 0.21376 0.12390 1.07442
   1   6   3   15.76  123.65   1-0.99321-0.83924 0.87089-0.55729-0.08132-1.03085
   1   6   3   25.82  140.38   1-0.94648-0.79274 0.89621-0.53091-0.09783-1.04697
  -1  -6  -2   77.65  115.56   1-0.11544-0.33122-1.22435 0.05268 0.11544 0.98797
  -1  -6  -2   64.31  133.67   1-0.97226-1.18687-0.65619 0.61888-0.97226-0.10032
   1   6   2   79.37  134.61   1-0.96405-0.74968 0.78905-0.48668-0.18108-1.05242
  -1  -6  -135522.13 2571.79   1-0.09218-0.36861-1.25019-0.12464 0.09218 0.88671
   1   6   136676.92 2337.27   1-0.97698-0.70167 0.67694-0.44858-0.26561-1.05955
   1   6   135535.43 2542.52   1-0.17689 0.09860 1.15251 0.02886-0.17689-0.97096
  -1  -6  -137416.99 2569.20   1-0.98100-1.25625-0.72596 0.39771-0.98100-0.18700
   1   6   138978.88 2101.93   1-0.97800-0.70305 0.67610-0.44867-0.26551-1.05900
  -1  -6   010547.93 1007.49   1-0.05255-0.38964-1.29245-0.31844 0.05255 0.76907
   1   6   010304.93  907.58   1-0.96357-0.62758 0.58227-0.39192-0.35014-1.06628
   1   6   0 6249.59  939.45   1-0.13485 0.20128 1.20224 0.23003-0.13485-0.85091
  -1  -6   0 7818.82 1174.92   1-0.99340-1.32928-0.88865 0.08364-0.99340-0.27733
   1   6   010406.05 1029.13   1-0.98802-0.65241 0.55690-0.41656-0.35119-1.06689
  -1  -6   1 7008.57  922.21   1 0.00499-0.39275-1.35004-0.52754-0.00499 0.63352
   1   6  -1 5893.74  942.51   1-0.53891-0.14117-0.60897-1.43146 0.53891-0.09959
   1   6  -1 7089.83  813.34   1-0.94761-0.55095 0.49116-0.33169-0.42848-1.06682
   1   6  -1 3851.36 1191.59   1 0.02557 0.42234 1.36953 0.54877 0.02557-0.61247
  -1  -6   1 3576.59 1040.69   1-0.96612-1.36262-1.25652-0.43560-0.96612-0.32798
   1   6  -1 6081.14  998.48   1-0.99376-0.59749 0.42947-0.39271-0.43919-1.07710
  -1  -6   1 7654.72 1024.92   1-0.82319-1.21946-0.75713 0.06504-1.09584-0.45794
  -1  -6   256640.65 2765.88   1 0.08145-0.37694-1.41958-0.74858-0.08145 0.47905
   1   6  -244774.86 2477.31   1-0.43294 0.02545-0.79198-1.46296 0.43294-0.12756
   1   6  -259504.29 2602.70   1-0.93010-0.47276 0.40579-0.26573-0.49936-1.05990
  -1  -6   259266.19 2777.87   1-0.60260-1.05994-0.50777 0.16375-1.11950-0.55897
   1   6  -260582.67 2615.37   1-0.99449-0.53757 0.29102-0.37985-0.53079-1.09091
  -1  -6   262276.29 3279.85   1-0.76672-1.22364-0.91670-0.24582-1.15980-0.59968
   1   6  -350331.80 2652.65   1-0.32485 0.19419-0.95695-1.47642 0.32485-0.15764
   1   6  -355524.44 2522.83   1-0.91238-0.39437 0.32922-0.19096-0.56095-1.04368
  -1  -6   355341.46 2978.47   1-0.54852-1.06652-0.61204-0.09187-1.17379-0.69107
   1   6  -349617.75 2446.69   1-0.98888-0.47130 0.13707-0.38252-0.62798-1.11032
  -1  -6   354926.82 2481.67   1-0.66346-1.18104-1.15214-0.63256-1.23968-0.75735
   1   6  -4 1870.76  421.35   1-0.21963 0.36007-1.09938-1.46734 0.21963-0.18487
   1   6  -4 1789.35  383.07   1-0.28796 0.29119 1.56645 1.19765 0.28796-0.11739
   1   6  -4 1627.04  423.99   1-0.89633-0.31765 0.26589-0.10294-0.61050-1.01543
  -1  -6   4 1977.04  518.93   1-0.46049-1.03919-0.76725-0.39841-1.24716-0.84224
   1   6  -4 1654.94  424.00   1-0.97426-0.39602-0.04005-0.40834-0.73387-1.13841
  -1  -6   4 1812.97  539.42   1-0.47526-1.05350-1.46387-1.09558-1.30807-0.90352
   1   6  -513959.15 1291.62   1-0.12227 0.51809-1.21663-1.43310 0.12227-0.20423
   1   6  -514212.58 1224.21   1-0.41079 0.22918 1.62293 1.40553 0.41079 0.08331
   1   6  -513707.79 1338.63   1-0.88468-0.24532 0.22272 0.00521-0.64359-0.97072
  -1  -6   513886.13 1320.96   1-0.32163-0.96099-0.98159-0.76407-1.33141-1.00427
   1   6  -5 9958.95 1354.74   1-0.96132-0.32204-0.58437-0.79940-0.96132-1.28734
   1   6  -511872.06 1634.74   1-0.40943 0.22958-1.62245-1.83782-0.40943-0.73582
   1   6  -512988.04 1541.42   1 0.14996 0.78876 1.77962 1.56361 1.27953 0.95278
   1   6  -511448.82 1314.36   1-0.94514-0.30624-0.25327-0.47028-0.85298-1.17974
   1   6  -6   50.99  100.90   1-0.03703 0.66398-1.30844-1.37338 0.03703-0.21146
   1   6  -6   61.69   91.08   1-0.53776 0.16303 1.65244 1.58647 0.53776 0.28817
   1   6  -6   57.22   93.91   1 0.10653 0.80642 1.25258 1.18782 1.39888 1.15032
   1   6  -6   46.62   88.11   1-0.88150-0.18147 0.21128 0.14511-0.65226-0.90159
  -1  -6   6   86.03  114.65   1 0.07451-0.62538 1.41359 1.47716 0.07451 0.32251
   1   6  -6   77.18  115.00   1-0.89673-0.19683-0.28565-0.34923-0.89673-1.14473
   1   6  -6   48.91  107.84   1-0.30725 0.39218 1.86748 1.80284 1.00528 0.75633
   1   6  -6   42.85   94.75   1-0.88995-0.19039-0.52192-0.58764-0.98961-1.23860
   1   6  -771582.67 2835.38   1 0.03309 0.79476-1.37652-1.28996-0.03309-0.20358
   1   6  -773411.42 2972.04   1-0.66044 0.10116 1.64551 1.73093 0.66044 0.48873
   1   6  -761574.60 2991.36   1-0.89329-0.13258 0.25442 0.33958-0.61935-0.79088
  -1  -6   763276.75 3341.17   1-0.05489-0.81542 1.29003 1.20215-0.05489 0.11509
   1   6  -770363.50 3170.79   1-0.87388-0.11335-0.20316-0.11529-0.87388-1.04386
   1   6  -8 9802.62 1166.51   1 0.08655 0.90888-1.42392-1.18584-0.08655-0.17904
   1   6  -810348.35 1165.56   1-0.77077 0.05165 1.59683 1.83367 0.77077 0.67695
  -1  -6   8 9844.51 1260.30   1-0.10957-0.93073 1.23095 0.99164-0.10957-0.01760
   1   6  -8 9137.38 1205.44   1-0.87021-0.04905-0.19057 0.04873-0.87021-0.96219
   1   6  -912097.66 1260.85   1-0.86243 0.02080 1.50566 1.89393 0.86243 0.84650
  -1  -6   911154.23 1428.01   1-0.12864-1.01042 1.20937 0.81863-0.12864-0.11468
   1   6 -10 1404.29  417.11   1-0.93137 0.01268 1.37468 1.91439 0.93137 0.99333
  -1  -6  10 1403.62  496.70   1-0.12769-1.07010 1.21046 0.66827-0.12769-0.19174
  -1  -6  11  195.59  186.24   1-0.11408-1.11713 1.22590 0.53227-0.11408-0.25613
   1   5   514066.78 1514.33   1-0.99197-1.02042 1.05243-0.52511 0.10740-0.89885
   1   5   515269.24 1322.53   1-0.90536-0.93394 1.07925-0.49752 0.05242-0.95347
  -1  -5  -4 6734.20  914.34   1-0.18416-0.21739-1.14367 0.28308 0.18416 1.11374
   1   5   4 6021.44  822.05   1-0.99487-0.96265 0.95424-0.47197 0.00313-0.92532
   1   5   4 6277.07  942.47   1-0.19495-0.16244 1.13039-0.29457-0.19495-1.12416
   1   5   4 6851.32  788.03   1-0.92958-0.89752 0.97968-0.44571-0.03066-0.95876
  -1  -5  -3  920.91  378.12   1-0.18373-0.27762-1.14419 0.13107 0.18373 1.03533
   1   5   3  810.39  394.45   1-0.99247-0.89958 0.85433-0.42055-0.09769-0.94835
   1   5   3  878.01  449.25   1-0.22116-0.12802 1.09743-0.17608-0.22116-1.07236
  -1  -5  -3  858.24  307.94   1-0.93274-1.02588-0.43516 0.83836-0.93274-0.08154
   1   5   3  976.33  347.00   1-0.95028-0.85758 0.87518-0.39880-0.11442-0.96472
  -1  -5  -2 7691.97 1038.81   1-0.16763-0.32217-1.16369-0.03996 0.16763 0.94121
   1   5   2 6144.84  831.19   1-0.78386-0.62932-0.06943-1.19317 0.78386 0.01028
   1   5   2 7068.38 1105.07   1-0.23688-0.08310 1.07719-0.04488-0.23688-1.01006
  -1  -5  -2 6489.27 1009.12   1-0.93294-1.08670-0.43608 0.68599-0.93294-0.15975
   1   5   2 6693.97  956.86   1-0.96741-0.81408 0.76493-0.35767-0.19939-0.97189
  -1  -5  -144685.77 2574.69   1-0.13366-0.34886-1.20361-0.23140 0.13366 0.82924
   1   5   136515.58 2256.79   1-0.69160-0.47640-0.29738-1.26960 0.69160-0.00397
   1   5   143028.26 2320.88   1-0.97385-0.75961 0.65258-0.31963-0.28768-0.98273
   1   5   142723.41 2545.81   1-0.23402-0.01962 1.08090 0.11026-0.23402-0.92920
  -1  -5  -141613.94 2748.26   1-0.94255-1.15696-0.48210 0.48854-0.94255-0.24737
   1   5   141883.94 2697.30   1-0.98087-0.76694 0.64702-0.32452-0.28672-0.98138
  -1  -5  -143285.03 2485.82   1-0.90721-1.12115-0.44828 0.52328-0.95371-0.25904
  -1  -5   035732.79 1823.50   1-0.07931-0.35517-1.26415-0.44344 0.07931 0.69689
   1   5   029575.15 2233.37   1-0.58355-0.30770-0.52450-1.34519 0.58355-0.03401
   1   5   029369.88 1740.02   1-0.95876-0.68384 0.55296-0.26792-0.37566-0.99291
  -1  -5   034541.40 1791.94   1-0.70413-0.97904-0.28914 0.53173-0.99395-0.37670
   1   5   033093.56 1949.83   1-0.18998 0.08504 1.13653 0.31733-0.18998-0.80715
  -1  -5   030553.13 1947.17   1-0.96755-1.24258-0.62373 0.19547-0.96755-0.35038
   1   5   033297.42 2007.55   1-0.99019-0.71561 0.51995-0.30031-0.37708-0.99396
  -1  -5   036424.71 1919.36   1-0.89219-1.16677-0.51275 0.30751-0.98521-0.36833
  -1  -5   158274.09 2815.79   1-0.00229-0.33880-1.34301-0.67381 0.00229 0.54186
   1   5  -155597.65 2834.71   1-0.94076-0.60517 0.45633-0.21320-0.45769-0.99714
   1   5  -143857.83 3329.78   1-0.00559 0.33006 1.33980 0.67204-0.00559-0.54475
   1   5  -150739.14 2677.96   1-0.99467-0.65942 0.37967-0.28930-0.47260-1.01170
  -1  -5   161011.53 3270.26   1-0.86018-1.19543-0.63487 0.03410-1.04229-0.50320
  -1  -5   2  131.56  127.75   1 0.09838-0.29878-1.43388-0.91621-0.09838 0.36318
   1   5  -2  181.43  159.77   1-0.33336 0.06380-0.94468-1.46236 0.33336-0.12820
   1   5  -2  103.02  109.48   1-0.92095-0.52469 0.36525-0.15297-0.53220-0.99386
  -1  -5   2  334.78  194.20   1-0.64796-1.04422-0.41418 0.10402-1.06763-0.60598
   1   5  -2  157.57  143.03   1-0.99272-0.59681 0.21962-0.29806-0.57647-1.03778
  -1  -5   2  119.53  127.01   1-0.79432-1.19023-0.84215-0.32447-1.13081-0.66950
   1   5  -332675.38 1721.36   1-0.20309 0.25472-1.12025-1.48641 0.20309-0.18046
   1   5  -333855.42 1723.74   1-0.22081 0.23647 1.52547 1.15863 0.22081-0.16341
   1   5  -336237.23 1855.77   1-0.90094-0.44400 0.28357-0.08332-0.59680-0.98066
  -1  -5   335692.50 2500.44   1-0.57832-1.03526-0.55550-0.18863-1.14482-0.76097
   1   5  -334502.53 1780.95   1-0.98085-0.52429 0.02747-0.33891-0.69425-1.07776
  -1  -5   330653.48 2033.70   1-0.65605-1.11262-1.16693-0.80054-1.24403-0.86051
   1   5  -469935.73 2888.07   1-0.07961 0.43885-1.26383-1.47848 0.07961-0.22594
   1   5  -472709.21 2790.54   1-0.35921 0.15888 1.60228 1.38686 0.35921 0.05287
   1   5  -475194.31 2924.22   1-0.88324-0.36563 0.21752 0.00198-0.64754-0.95359
  -1  -5   471863.28 2994.46   1-0.45728-0.97490-0.77260-0.55707-1.24952-0.94348
   1   5  -460266.53 3540.14   1-0.33208 0.18523-1.58959-1.80330-0.33208-0.63751
   1   5  -460858.26 2944.60   1-0.95039-0.43316-0.22086-0.43596-0.83547-1.14120
  -1  -5   467353.60 3189.55   1-0.36703-0.88426-1.59547-1.38036-1.31604-1.01030
   1   5  -524125.52 1804.85   1 0.02985 0.60898-1.37353-1.43668-0.02985-0.25741
   1   5  -524615.96 1556.51   1-0.50368 0.07522 1.64776 1.58375 0.50368 0.27522
   1   5  -520826.99 1680.61   1-0.87204-0.29375 0.17806 0.11386-0.67723-0.90548
  -1  -5   521313.79 1943.02   1-0.25112-0.82941-1.07805-1.01385-1.36141-1.13316
  -1  -5   516227.19 1829.69   1-0.07179-0.64996 1.27221 1.33418-0.07179 0.15532
   1   5  -519163.06 1745.63   1-0.88752-0.30935-0.25150-0.31350-0.88752-1.11465
   1   5  -520424.40 2075.71   1-0.14523 0.43251 1.88246 1.81958 1.13279 0.90488
   1   5  -517332.31 1785.97   1-0.87833-0.30044-0.56788-0.63169-1.01141-1.23935
   1   5  -638457.36 2239.48   1 0.12035 0.76014-1.45187-1.36352-0.12035-0.26991
   1   5  -638729.04 2231.84   1-0.64244-0.00271 1.64916 1.73658 0.64244 0.49187
   1   5  -625575.66 2548.91   1-0.08923 0.54955 1.44208 1.53054 1.40129 1.25155
   1   5  -634731.75 2279.09   1-0.87473-0.23577 0.18739 0.27452-0.67025-0.82070
  -1  -5   638526.67 2504.36   1-0.18938-0.82818 1.13726 1.04782-0.18938-0.04027
   1   5  -638450.32 2206.93   1-0.85713-0.21833-0.14697-0.05751-0.85713-1.00624
   1   5  -626185.50 2198.45   1-0.71726-0.07872-1.03696-0.94950-1.20299-1.35317
   1   5  -772095.17 3196.76   1-0.76476-0.06421 1.60086 1.83970 0.76476 0.69208
  -1  -5   766302.47 2876.05   1-0.18927-0.88973 1.50391 1.26529 0.18927 0.26210
   1   5  -751166.17 3344.58   1-0.57837 0.12106 1.66140 1.90130 1.14479 1.07290
   1   5  -759312.37 2860.07   1-0.90686-0.20722 0.30687 0.54535-0.57858-0.65122
  -1  -5   767110.09 3443.71   1-0.22908-0.92851 1.08728 0.84638-0.22908-0.15798
   1   5  -771470.44 3303.10   1-0.85171-0.15228-0.12942 0.11149-0.85171-0.92280
   1   5  -744051.14 3278.56   1-0.45881 0.24038-1.48582-1.24706-1.31057-1.38294
   1   5  -8 1944.27  471.87   1-0.86327-0.10190 1.50449 1.89474 0.86327 0.86847
  -1  -5   8 1743.24  496.95   1-0.23735-0.99871 1.53619 1.14594 0.23735 0.23215
  -1  -5   8 1845.48  496.69   1-0.23608-0.99614 1.07822 0.68587-0.23608-0.24300
   1   5  -8 1702.28  520.40   1-0.85766-0.09760-0.14869 0.24365-0.85766-0.85074
   1   5  -9 4548.12  715.30   1-0.93448-0.11229 1.36635 1.90802 0.93448 1.01757
  -1  -5   9 3950.22  630.25   1-0.26557-1.08775 1.55353 1.01187 0.26557 0.18248
  -1  -5   9 4478.76  817.72   1-0.22589-1.04657 1.09137 0.54760-0.22589-0.31081
  -1  -5   9 3052.23  760.88   1 0.03499-0.78529 1.83917 1.29652 1.23520 1.15193
  -1  -5  10 4503.95  901.15   1-0.20519-1.08650 1.11763 0.42241-0.20519-0.36812
  -1  -5  10 2660.12  763.85   1-0.06645-0.94738 1.87108 1.17703 1.18252 1.02144
  -1  -5  11 8454.85 1150.59   1-0.17729-1.11924 1.15203 0.30537-0.17729-0.41824
   1   4   6 5887.68 1072.93   1-0.98265-1.13285 1.15242-0.42316 0.21988-0.76530
   1   4   6 6071.37  942.25   1-0.16824-0.31808 1.16296-0.41185-0.16824-1.15458
  -1  -4  -5 1054.84  451.89   1-0.24239-0.15374-1.07000 0.35495 0.24239 1.15103
   1   4   5  965.11  396.35   1-0.99173-1.08126 1.05632-0.36792 0.11166-0.79572
   1   4   5  937.02  430.21   1-0.20532-0.29454 1.11747-0.30589-0.20532-1.11365
  -1  -4  -4 3610.44  707.73   1-0.25186-0.22386-1.05755 0.21589 0.25186 1.08250
   1   4   4 3075.13  694.66   1-0.91599-0.94398 0.36192-0.91153 0.91599 0.08534
   1   4   4 3192.26  652.19   1-0.99486-1.02372 0.95723-0.31567 0.00622-0.82335
   1   4   4 3248.98  602.41   1-0.23735-0.26594 1.07657-0.19535-0.23735-1.06766
   1   4   4 3706.14  601.90   1-0.92989-0.95888 0.97830-0.29396-0.03179-0.86106
  -1  -4  -3 2774.51  481.34   1-0.24507-0.27772-1.06649 0.05544 0.24507 0.99771
   1   4   3 2326.46  556.24   1-0.85086-0.81820 0.12670-0.99524 0.85086 0.09822
   1   4   3 2448.72  536.69   1-0.99254-0.96072 0.85574-0.26583-0.09630-0.84808
   1   4   3 2693.94  658.24   1-0.26234-0.23030 1.04360-0.07686-0.26234-1.01464
  -1  -4  -3 2569.22  586.25   1-0.88157-0.91361-0.23010 0.89039-0.88157-0.12926
   1   4   3 2910.55  639.24   1-0.95048-0.91884 0.87402-0.24686-0.11534-0.86681
  -1  -4  -263008.26 2844.12   1-0.21923-0.31255-1.09989-0.12947 0.21923 0.89387
   1   4   256556.16 2758.80   1-0.76343-0.67011-0.12340-1.09383 0.76343 0.08879
  -1  -4  -258390.49 2516.75   1-0.76162-0.85411-0.14825 0.82199-0.90521-0.23123
   1   4   262213.10 2652.95   1-0.27621-0.18354 1.02491 0.05587-0.27621-0.95051
  -1  -4  -255767.10 2425.95   1-0.87415-0.96682-0.20410 0.76492-0.87415-0.19986
   1   4   260354.47 2492.33   1-0.96767-0.87540 0.76296-0.20652-0.20087-0.87454
  -1  -4  -113070.48 1325.48   1-0.17060-0.32457-1.16011-0.34121 0.17060 0.76723
   1   4   112047.22 1345.70   1-0.65237-0.49840-0.38399-1.20290 0.65237 0.05574
   1   4   112130.89 1237.93   1-0.97331-0.82014 0.64850-0.17042-0.29136-0.88754
  -1  -4  -112392.18 1037.18   1-0.76804-0.92121-0.13154 0.68738-0.89429-0.29811
   1   4   112593.06 1179.92   1-0.26920-0.11591 1.03440 0.21679-0.26920-0.86549
  -1  -4  -111840.31 1159.41   1-0.87657-1.02987-0.21249 0.60512-0.87657-0.28028
   1   4   112960.67 1233.52   1-0.98129-0.82839 0.64249-0.17587-0.29001-0.88586
  -1  -4  -112417.26 1126.46   1-0.94207-1.09498-0.27149 0.54687-0.86273-0.26688
  -1  -4   011654.38 1063.62   1-0.09491-0.30954-1.24720-0.57979 0.09491 0.61355
   1   4   010394.97 1515.38   1-0.51826-0.30364-0.64648-1.31387 0.51826-0.00036
   1   4   010928.66 1078.77   1-0.95737-0.74352 0.54484-0.12274-0.38268-0.90106
  -1  -4   012012.45  973.12   1-0.76335-0.97719-0.14378 0.52380-0.90230-0.38392
   1   4   0 9213.00 1226.59   1-0.21145 0.00247 1.10975 0.44359-0.21145-0.72973
  -1  -4   011169.59 1152.29   1-0.90135-1.11528-0.30329 0.36286-0.90135-0.38307
   1   4   011613.16 1053.85   1-0.99074-0.77718 0.50931-0.15775-0.38448-0.90254
  -1  -4   011853.02 1278.10   1-0.92922-1.14279-0.34216 0.32490-0.89989-0.38183
  -1  -4   168672.80 2474.74   1 0.01115-0.26413-1.35594-0.84005-0.01115 0.42947
   1   4  -167708.68 2517.85   1-0.93812-0.66360 0.44344-0.07281-0.46840-0.90898
   1   4  -166107.28 2428.72   1-0.99484-0.72062 0.35583-0.15994-0.48841-0.92869
  -1  -4   169225.71 3066.78   1-0.89727-1.17150-0.49155 0.02423-0.97495-0.53468
  -1  -4   211652.96 1111.17   1 0.14738-0.18855-1.47309-1.10871-0.14738 0.21524
   1   4  -211703.99 1227.63   1-0.20240 0.13352-1.12111-1.48549 0.20240-0.16021
   1   4  -211603.53 1070.10   1-0.91673-0.58154 0.34729-0.01762-0.54658-0.90936
  -1  -4   212085.89 1034.00   1-0.69530-1.03049-0.30956 0.05535-1.00632-0.64354
   1   4  -2 9999.74  951.77   1-0.99047-0.65559 0.16662-0.19786-0.60970-0.97219
  -1  -4   212050.01 1176.82   1-0.81738-1.15226-0.77491-0.41042-1.10332-0.74082
   1   4  -327314.62 1838.34   1-0.04271 0.35387-1.30263-1.51549 0.04271-0.24190
   1   4  -327301.29 1528.12   1-0.30683 0.08938 1.57672 1.36327 0.30683 0.02162
   1   4  -324366.26 1612.94   1-0.89521-0.49935 0.26164 0.04806-0.61379-0.89877
  -1  -4   326750.52 2180.49   1-0.60055-0.99641-0.51186-0.29830-1.12170-0.83673
   1   4  -321700.45 1594.66   1-0.98777-0.59215-1.11681-1.32886-0.98777-1.27225
   1   4  -323472.65 1549.84   1-0.28235 0.11324-1.56329-1.77526-0.28235-0.56680
   1   4  -317496.46 1453.70   1-0.96803-0.57248-0.09450-0.30769-0.76516-1.04987
  -1  -4   322013.80 1849.59   1-0.60279-0.99834-1.26632-1.05312-1.27074-0.98603
   1   4  -4  517.34  208.98   1 0.10040 0.55765-1.43557-1.49691-0.10040-0.30702
   1   4  -4  594.45  280.38   1-0.47530-0.01825 1.64197 1.57994 0.47530 0.26797
   1   4  -4  497.24  221.48   1-0.87734-0.42080 0.19653 0.13429-0.66339-0.87057
  -1  -4   4  546.03  263.36   1-0.41357-0.87011-0.84355-0.78132-1.27963-1.07246
  -1  -4   4  459.47  275.30   1-0.24933-0.70577 1.06088 1.12127-0.24933-0.04310
   1   4  -4  592.14  244.28   1-0.89740-0.44096-0.28817-0.34856-0.89740-1.10363
   1   4  -4  509.29  284.96   1 0.05931 0.51538 1.82867 1.76752 1.24596 1.03908
   1   4  -4  476.25  269.70   1-0.89143-0.43522-0.51589-0.57779-0.98672-1.19363
   1   4  -5 6916.64  850.05   1-0.63486-0.11701 1.65041 1.73979 0.63486 0.50542
  -1  -4   5 6740.48 1049.04   1-0.21723-0.73502 1.52310 1.43385 0.21723 0.34679
   1   4  -5 5132.89 1175.31   1 0.04709 0.56414 1.31571 1.40590 1.40539 1.27661
   1   4  -5 6312.70  825.05   1-0.87101-0.35379 0.17451 0.26359-0.67988-0.80926
  -1  -4   5 7110.55 1052.53   1-0.33637-0.85344 0.94032 0.84927-0.33637-0.20815
   1   4  -5 6754.67  977.58   1-0.85139-0.33433-0.12841-0.03736-0.85139-0.97962
   1   4  -5 4964.84 1247.54   1-0.65294-0.13624 1.62215 1.71236 0.59285 0.46376
   1   4  -5 4839.47  864.43   1-0.64605-0.12918-1.18647-1.09708-1.24962-1.37875
   1   4  -612282.27 1166.21   1-0.77053-0.19185 1.59700 1.83781 0.77053 0.71897
  -1  -4   611702.01 1224.30   1-0.30500-0.88367 1.57576 1.33495 0.30500 0.35655
   1   4  -6 6966.27 1255.10   1-0.56967 0.00801 1.66149 1.90316 1.15347 1.10256
   1   4  -6 9761.54 1181.36   1-0.89666-0.31877 0.26715 0.50757-0.60953-0.66111
  -1  -4   611846.06 1325.31   1-0.35275-0.93044 0.91628 0.67380-0.35275-0.30253
   1   4  -612193.33 1275.30   1-0.84077-0.26307-0.09489 0.14760-0.84077-0.89098
   1   4  -6 5735.92 1602.18   1-0.93085-0.35351 0.97390 1.21550-0.03538-0.08667
   1   4  -6 8364.99 1391.88   1-0.23305 0.34447-1.72067-1.47999-1.30110-1.35244
   1   4  -7  410.15  178.12   1-0.87418-0.23469 1.48861 1.88084 0.87418 0.90051
  -1  -4   7  376.56  223.07   1-0.36481-1.00430 1.60473 1.21252 0.36481 0.33848
  -1  -4   7  435.70  252.21   1-0.34381-0.98213 0.92945 0.53553-0.34381-0.37160
   1   4  -7  439.17  248.03   1-0.84499-0.20667-0.10809 0.28585-0.84499-0.81719
  -1  -4   7  358.16  288.10   1-0.07549-0.71346 1.87297 1.47998 1.17720 1.15069
   1   4  -7  314.34  233.43   1-0.98696-0.34877 0.57258 0.96456-0.34011-0.31367
   1   4  -8 1612.72  437.18   1-0.94432-0.24401 1.33768 1.88132 0.94432 1.04854
  -1  -4   8 1690.42  554.74   1-0.40026-1.10056 1.61908 1.07544 0.40026 0.29604
  -1  -4   8 1699.53  488.87   1-0.32239-1.02135 0.96049 0.41511-0.32239-0.42820
   1   4  -8 1719.75  525.27   1-0.85623-0.15728-0.14403 0.40135-0.85623-0.75042
  -1  -4   8 1370.59  492.14   1-0.23817-0.93678 1.88040 1.33601 1.06394 0.95964
   1   4  -949695.81 3322.95   1-0.98333-0.22221 1.15642 1.85147 0.98333 1.16543
  -1  -4   944902.42 3259.74   1-0.41506-1.17619 1.62442 0.92937 0.41506 0.23295
  -1  -4   949739.46 3566.16   1-0.29351-1.05308 1.00115 0.30435-0.29351-0.47733
  -1  -4   940961.21 3503.76   1-0.31670-1.07594 1.86491 1.16914 0.99672 0.81462
  -1  -4  10 1516.05  482.05   1-0.25949-1.07969 1.04742 0.19916-0.25949-0.52132
  -1  -4  10 1138.35  501.91   1-0.34872-1.16858 1.85477 1.00761 0.96680 0.70690
  -1  -4  11   76.22  136.42   1-0.22154-1.10238 1.09694 0.09725-0.22154-0.56138
   1   3   7 6922.28 1298.50   1-0.84352-1.11546 1.27224-0.30106 0.22428-0.73954
   1   3   620509.91 1907.94   1-0.97953-1.19080 1.17486-0.24740 0.24614-0.64016
   1   3   621789.71 1761.40   1-0.20164-0.41259 1.12207-0.29969-0.20164-1.08908
   1   3   622420.09 2261.50   1-0.87393-1.08524 1.18571-0.23618 0.14528-0.74074
  -1  -3  -526736.00 2205.26   1-0.31914-0.16926-0.96513 0.30651 0.31914 1.12884
   1   3   523625.54 2468.90   1-0.96693-1.11680 0.61962-0.65203 0.96693 0.15722
   1   3   525865.07 2274.12   1-0.99002-1.14063 1.08090-0.19004 0.13873-0.66977
   1   3   524512.96 1997.05   1-0.23663-0.38695 1.07751-0.19282-0.23663-1.04606
  -1  -3  -410680.43  992.84   1-0.32428-0.23506-0.95777 0.16235 0.32428 1.05598
   1   3   4 9629.66 1161.38   1-0.92181-1.01103 0.38652-0.73361 0.92181 0.19011
   1   3   4 9275.81 1114.43   1-0.99459-1.08451 0.98359-0.13600 0.03372-0.69697
   1   3   4 9493.20 1031.60   1-0.26617-0.35586 1.03847-0.08041-0.26617-0.99760
  -1  -3  -4 9378.25 1014.60   1-0.83879-0.74910-0.08878 1.03012-0.83879-0.10736
   1   3   4 9457.45 1059.02   1-0.92487-1.01492 1.00060-0.11853-0.01347-0.74391
  -1  -3  -3  640.88  262.02   1-0.30987-0.28130-0.97828-0.00966 0.30987 0.96357
   1   3   3  562.25  279.19   1-0.85072-0.87929 0.12626-0.84236 0.85072 0.19702
   1   3   3  559.89  306.92   1-0.99368-1.02294 0.88351-0.08477-0.06875-0.72166
  -1  -3  -3  575.88  268.70   1-0.80811-0.77885-0.02192 0.94635-0.82064-0.16774
   1   3   3  557.62  283.35   1-0.28776-0.31683 1.00911 0.04166-0.28776-0.94118
  -1  -3  -3  557.66  236.38   1-0.81609-0.78703-0.02078 0.94667-0.81609-0.16267
   1   3   3  564.96  217.12   1-0.94564-0.97505 0.90070-0.06706-0.09428-0.74692
  -1  -3  -3  525.75  290.27   1-0.97141-0.94198-0.06587 0.90187-0.74878-0.09618
  -1  -3  -297689.64 4556.40   1-0.27085-0.30293-1.03216-0.21507 0.27085 0.84654
   1   3   295222.07 4733.36   1-0.74845-0.71636-0.16158-0.97868 0.74845 0.17275
  -1  -3  -297484.25 4201.49   1-0.82433-0.85574 0.02546 0.84240-0.78773-0.21262
   1   3   2101798.7 4516.06   1-0.29603-0.26447 0.99767 0.18166-0.29603-0.87144
  -1  -3  -297968.33 4616.77   1-0.79440-0.82597 0.04065 0.85666-0.79440-0.21900
   1   3   294151.33 4162.34   1-0.96332-0.93210 0.79408-0.02228-0.17725-0.75209
  -1  -3  -2102110.3 4273.38   1-0.97383-1.00506-0.04405 0.77240-0.73619-0.16137
  -1  -3  -1 1425.38  334.18   1-0.20021-0.29295-1.12385-0.45826 0.20021 0.69790
   1   3   1 1290.20  458.25   1-0.61002-0.51728-0.47202-1.13762 0.61002 0.11233
   1   3   1 1319.39  348.04   1-0.97709-0.88500 0.67782 0.01222-0.26481-0.76211
  -1  -3  -1 1478.56  352.68   1-0.83227-0.92437 0.04941 0.71501-0.77083-0.27353
   1   3   1 1443.19  431.68   1-0.27720-0.18501 1.02356 0.35899-0.27720-0.77460
  -1  -3  -1 1272.14  332.71   1-0.77642-0.86861 0.08935 0.75391-0.77642-0.27902
   1   3   1 1336.06  346.56   1-0.97784-0.88595 0.67755 0.01240-0.26444-0.76147
  -1  -3   069368.25 2538.24   1-0.09021-0.24361-1.25234-0.73825 0.09021 0.50990
   1   3   062818.64 2635.61   1-0.43418-0.28079-0.78997-1.30405 0.43418 0.01449
   1   3   068812.03 2507.99   1-0.96232-0.80955 0.57444 0.06017-0.35699-0.77649
  -1  -3   070494.46 2705.76   1-0.82891-0.98167 0.03921 0.55348-0.77805-0.35855
   1   3   062768.67 2592.80   1-0.18363-0.03081 1.14430 0.63119-0.18363-0.60302
  -1  -3   068832.60 2910.06   1-0.77086-0.92368 0.10404 0.61717-0.77086-0.35147
   1   3   069362.42 2446.47   1-0.98870-0.83615 0.54606 0.03220-0.35882-0.77806
  -1  -3   069229.35 2538.50   1-0.96433-1.11688-0.12384 0.39004-0.78177-0.36252
  -1  -3   115004.82 1174.03   1 0.06335-0.15069-1.40382-1.04127-0.06335 0.27832
   1   3  -114429.84 1320.80   1-0.94419-0.73074 0.47348 0.11054-0.44336-0.78506
  -1  -3   113433.63 1342.06   1-0.29460-0.50789-1.57014-1.20839-0.29460 0.04683
   1   3  -114607.31 1382.37   1-0.99459-0.78138 0.38646 0.02388-0.46808-0.80954
  -1  -3   115239.11 1202.64   1-0.93640-1.14962-0.30364 0.05894-0.87976-0.53830
   1   3  -2 6471.42  803.44   1-0.01574 0.25896-1.32982-1.54088 0.01574-0.24793
   1   3  -2 5498.91  701.40   1-0.25350 0.02084 1.54627 1.33481 0.25350-0.01057
   1   3  -2 6160.56  740.90   1-0.92420-0.65008 0.37937 0.16777-0.52082-0.78472
  -1  -3   2 6468.77  770.33   1-0.74904-1.02315-0.18038 0.03122-0.92597-0.66207
   1   3  -2 5636.20  735.11   1-0.99024-0.71637 0.16200-0.04929-0.61257-0.87625
  -1  -3   2 5651.64  836.93   1-0.83213-1.10599-0.72908-0.51781-1.08389-0.82023
   1   3  -3 1779.64  405.91   1-0.45747-0.12231 1.63751 1.57745 0.45747 0.27128
   1   3  -3 1456.42  540.64   1-0.90563-0.57084 0.30198 0.24172-0.58241-0.76850
  -1  -3   3 1696.46  433.41   1-0.60492-0.93971-0.50314-0.44287-1.11701-0.93090
  -1  -3   3 1758.96  409.80   1-0.49078-0.82549 0.69496 0.75376-0.49078-0.30543
   1   3  -3 1599.32  417.94   1-0.93837-0.60366-0.46165-0.52044-0.93837-1.12372
   1   3  -3 1572.45  478.44   1-0.94268-0.60815-0.26792-0.32791-0.86082-1.04671
  -1  -3   3 1537.03  483.74   1-0.35943-0.69396-1.60362-1.54364-1.31588-1.13000
   1   3  -438958.89 1977.12   1-0.64488-0.24890 1.64873 1.74008 0.64488 0.53657
  -1  -3   439943.36 2490.27   1-0.33110-0.72709 1.58912 1.49775 0.33110 0.43941
   1   3  -430966.37 1751.86   1-0.89708-0.50161 0.26872 0.35980-0.60832-0.71661
  -1  -3   435400.28 2162.15   1-0.22696-0.62244-1.10933-1.20044-1.36986-1.26160
  -1  -3   437168.76 2099.52   1-0.50228-0.89762 0.67487 0.58223-0.50228-0.39494
   1   3  -437079.24 1866.36   1-0.86353-0.46820-0.16806-0.07543-0.86353-0.97088
   1   3  -427728.28 2591.53   1-0.70092-0.30590 1.55561 1.64758 0.51424 0.40619
   1   3  -433436.37 2414.66   1-0.57929-0.18411-1.30671-1.21543-1.28024-1.38835
   1   3  -5 1640.49  348.88   1-0.79386-0.33706 1.57942 1.82221 0.79386 0.76344
  -1  -3   5 1609.54  475.63   1-0.43940-0.89620 1.63235 1.38955 0.43940 0.46982
   1   3  -5  734.55  406.02   1-0.66422-0.20827 1.64924 1.89267 1.04745 1.01751
   1   3  -5 1065.47  400.06   1-0.93167-0.47552 0.41297 0.65536-0.49350-0.52400
  -1  -3   5 1657.66  466.96   1-0.48222-0.93818 0.70974 0.46565-0.48222-0.45289
   1   3  -5 1645.93  441.38   1-0.84138-0.38542-0.09680 0.14727-0.84138-0.87072
  -1  -3   5 1237.44  566.08   1-0.09343-0.54909 1.87631 1.63295 1.16637 1.19661
   1   3  -5  753.44  618.44   1-0.96255-0.50689 0.79938 1.04274-0.17319-0.20345
   1   3  -6156735.4 6286.83   1-0.89787-0.38025 1.44872 1.84292 0.89787 0.94533
  -1  -3   6150494.9 6602.84   1-0.50846-1.02608 1.64857 1.25436 0.50846 0.46099
  -1  -3   6146376.2 6296.77   1-0.45224-0.96883 0.76034 0.36480-0.45224-0.50092
   1   3  -6152728.2 6415.96   1-0.84064-0.32405-0.09450 0.30103-0.84064-0.79196
   1   3  -6137403.3 6240.14   1-0.99228-0.47577 0.47494 0.86883-0.40820-0.36073
   1   3  -7 2949.97  717.57   1-0.96089-0.38246 1.27893 1.82455 0.96089 1.08624
  -1  -3   7 2788.12  548.31   1-0.54705-1.12548 1.65326 1.10764 0.54705 0.42170
  -1  -3   7 2728.16  563.70   1-0.41727-0.99449 0.81717 0.27020-0.41727-0.54396
   1   3  -7 2621.20  649.58   1-0.84955-0.27233-0.12252 0.42445-0.84955-0.72286
  -1  -3   7 2004.30  641.93   1-0.50349-1.08042 1.77079 1.22466 0.79916 0.67382
   1   3  -7 2423.79  737.34   1-0.99410-0.41693 0.26870 0.81388-0.54518-0.41992
   1   3  -8 4204.56  664.95   1-0.99037-0.35112 1.08674 1.78378 0.99037 1.19360
  -1  -3   8 3726.37  627.99   1-0.56259-1.20184 1.65420 0.95715 0.56259 0.35935
  -1  -3   8 3696.03  719.46   1-0.37902-1.01687 0.87680 0.17839-0.37902-0.58372
  -1  -3   8 3173.12  699.24   1-0.54312-1.18068 1.73876 1.04125 0.74931 0.54617
   1   3  -9 1430.02  368.57   1-0.99313-0.29307 0.88206 1.73051 0.99313 1.27426
  -1  -3   9 1127.56  376.46   1-0.56010-1.26016 1.65408 0.80563 0.56010 0.27898
  -1  -3   9 1279.86  425.94   1-0.33821-1.03670 0.93763 0.08779-0.33821-0.62092
  -1  -3   9 1161.53  453.55   1-0.54982-1.24801 1.73287 0.88396 0.74057 0.45963
  -1  -3  10 2438.80  546.68   1-0.29519-1.05429 0.99884-0.00246-0.29519-0.65591
  -1  -3  10 1849.12  583.23   1-0.53779-1.29661 1.74336 0.74306 0.75621 0.39747
  -1  -3  11 4289.04  790.74   1-0.25010-1.06983 1.05987-0.09286-0.25010-0.68883
   1   2   7  806.46  384.32   1-0.95238-1.28516 1.30445-0.11645 0.40679-0.45872
   1   2   7  839.74  334.30   1-0.18710-0.51978 1.14007-0.28012-0.18710-1.05367
   1   2   7  858.10  378.65   1-0.83196-1.16495 1.30184-0.11832 0.25215-0.61284
   1   2   6 3678.82  733.48   1-0.99436-1.26760 0.91965-0.34977 0.99436 0.20621
   1   2   6 3667.02  706.49   1-0.97179-1.24415 1.22088-0.04808 0.30131-0.48611
   1   2   6 3675.58  724.23   1-0.22341-0.49546 1.09455-0.17418-0.22341-1.01197
   1   2   6 3618.73  791.47   1-0.86168-1.13402 1.22221-0.04657 0.17819-0.60900
  -1  -2  -5  594.46  252.83   1-0.40465-0.19354-0.83713 0.28120 0.40465 1.11541
   1   2   5  397.16  251.14   1-0.97933-1.19175 0.71138-0.40662 0.97933 0.26907
   1   2   5  434.09  247.10   1-0.98497-1.19665 1.13348 0.01585 0.19803-0.51159
  -1  -2  -5  432.48  190.37   1-0.81651-0.60483 0.00237 1.12000-0.80385-0.09422
   1   2   5  523.56  315.28   1-0.25496-0.46638 1.05343-0.06386-0.25496-0.96551
  -1  -2  -433296.75 1745.94   1-0.40582-0.25536-0.83529 0.13152 0.40582 1.03857
   1   2   429353.51 2046.42   1-0.93871-1.08916 0.46331-0.50352 0.93871 0.30595
   1   2   426832.97 1765.81   1-0.99248-1.14348 1.04331 0.07702 0.09748-0.53434
  -1  -2  -429543.91 2122.61   1-0.84723-0.69622 0.09595 1.06226-0.73754-0.10571
   1   2   428491.92 1966.40   1-0.27997-0.43076 1.01979 0.05394-0.27997-0.91250
  -1  -2  -430621.04 1680.10   1-0.77412-0.62333 0.09544 1.06128-0.77412-0.14159
  -1  -2  -428627.24 1947.12   1-0.98622-0.83511 0.09542 1.06123-0.65345-0.02188
  -1  -2  -347061.53 2406.95   1-0.38220-0.29240-0.87194-0.05662 0.38220 0.93696
   1   2   344614.11 2765.58   1-0.86523-0.95503 0.17373-0.64157 0.86523 0.31048
   1   2   340431.50 2659.82   1-0.99487-1.08520 0.95124 0.13628 0.00003-0.55399
  -1  -2  -346744.99 2423.03   1-0.87200-0.78167 0.17793 0.99289-0.67733-0.12330
   1   2   345095.48 2570.69   1-0.29483-0.38500 0.99933 0.18491-0.29483-0.84936
  -1  -2  -345711.14 2514.50   1-0.73618-0.64601 0.19205 1.00647-0.73618-0.18165
   1   2   347480.43 2672.04   1-0.93223-1.02269 0.96753 0.15290-0.04057-0.59438
  -1  -2  -348005.80 2474.16   1-0.99014-0.89969 0.15999 0.97452-0.61381-0.06003
  -1  -2  -2 3275.55  569.84   1-0.32375-0.29460-0.95854-0.29473 0.32375 0.80050
   1   2   2 2852.66  637.09   1-0.74520-0.77435-0.16971-0.83351 0.74520 0.26845
  -1  -2  -2 2706.69  498.31   1-0.89067-0.86101 0.24463 0.90826-0.62687-0.15065
   1   2   2 2831.95  550.04   1-0.29137-0.32091 1.00413 0.34117-0.29137-0.76788
  -1  -2  -2 3060.55  552.74   1-0.69092-0.66138 0.29894 0.96192-0.69092-0.21440
   1   2   2 3113.11  510.75   1-0.94999-0.97982 0.87679 0.21354-0.11317-0.58918
  -1  -2  -2 3115.95  564.60   1-0.99231-0.96252 0.20837 0.87162-0.58357-0.10757
  -1  -2  -111458.76 1066.97   1-0.21525-0.24676-1.10494-0.59265 0.21525 0.61400
   1   2   111041.68 1403.55   1-0.56228-0.53077-0.56535-1.07764 0.56228 0.16353
   1   2   110354.78 1087.19   1-0.98651-0.95549 0.76692 0.25461-0.18208-0.58051
  -1  -2  -112045.58 1212.38   1-0.90239-0.93341 0.28922 0.80153-0.59239-0.19396
   1   2   110500.98 1057.60   1-0.24672-0.21563 1.06432 0.55279-0.24672-0.64522
  -1  -2  -110688.04  975.89   1-0.63038-0.66147 0.43036 0.94189-0.63038-0.23187
   1   2   111168.16 1064.92   1-0.96504-0.93423 0.78207 0.27021-0.18639-0.58461
  -1  -2  -110994.29 1090.23   1-0.99304-1.02391 0.22899 0.74094-0.57053-0.17232
  -1  -2   0157225.9 3812.43   1-0.04064-0.13280-1.30474-0.94399 0.04064 0.36138
   1   2   0159711.7 4397.28   1-0.97736-0.88567 0.68000 0.31903-0.26282-0.58345
  -1  -2   0181408.3 4247.57   1-0.90461-0.99630 0.29794 0.65890-0.58558-0.26496
   1   2   0153120.1 4383.56   1-0.07057 0.02114 1.27351 0.91341-0.07057-0.39106
  -1  -2   0175903.2 4584.75   1-0.52146-0.61318 0.64074 1.00082-0.52146-0.20097
   1   2   0166399.0 4464.05   1-0.97756-0.88603 0.68028 0.31961-0.26244-0.58287
   1   2  -149434.98 2148.07   1-0.00908 0.14373-1.33637-1.54563 0.00908-0.23365
   1   2  -144011.87 2342.69   1-0.19874-0.04631 1.51054 1.30099 0.19874-0.04424
   1   2  -143001.14 2182.04   1-0.96711-0.81475 0.60512 0.39549-0.33004-0.57286
  -1  -2   146910.04 2248.78   1-0.74167-0.89388-1.61471-1.40600-0.74167-0.49913
   1   2  -150571.20 2741.74   1-0.98745-0.83526 0.56543 0.35606-0.34517-0.58781
  -1  -2   148238.08 2278.54   1-0.97921-1.13139 0.00933 0.21871-0.70498-0.46234
   1   2  -2150909.6 3852.98   1-0.46161-0.24832 1.63860 1.58051 0.46161 0.29655
  -1  -2   2165744.4 4103.80   1-0.26978-0.48307 1.55602 1.61411 0.26978 0.43485
   1   2  -2154775.8 4475.88   1-0.96026-0.74722 0.56192 0.50363-0.36789-0.53291
  -1  -2   2168851.8 4882.14   1-0.82417-1.03722 0.02499 0.08329-0.78805-0.62303
  -1  -2   2166969.7 5194.26   1-0.83228-1.04525-0.06884-0.01164-0.83228-0.66781
   1   2  -2155314.7 4225.28   1-0.99406-0.78122-0.90820-0.96552-0.99406-1.15866
   1   2  -2143906.7 4433.61   1-0.99446-0.78161 0.39541 0.33733-0.46210-0.62695
  -1  -2   2137286.4 4615.08   1-0.81103-1.02389-0.79389-0.73581-1.11120-0.94635
   1   2  -347019.60 2021.24   1-0.68640-0.41229 1.63836 1.73170 0.68640 0.59922
   1   2  -345197.48 2362.92   1-0.97051-0.69680 0.62830 0.72134-0.30945-0.39667
  -1  -2   342027.40 2413.54   1-0.52198-0.79570-0.66062-0.75366-1.19775-1.11054
  -1  -2   346393.97 2309.79   1-0.69234-0.96594 0.29571 0.20147-0.69234-0.60588
   1   2  -347251.21 2337.45   1-0.90222-0.62861-0.30665-0.21241-0.90222-0.98868
   1   2  -351387.06 2545.71   1-0.95425-0.68091 0.85209 0.94578-0.13250-0.21953
   1   2  -351515.85 2446.64   1-0.54892-0.27541-1.35611-1.26291-1.29068-1.37775
   1   2  -459222.34 2331.58   1-0.84244-0.50752 1.53125 1.77601 0.84244 0.83315
  -1  -2   457836.89 2836.40   1-0.59997-0.93489 1.65398 1.40923 0.59997 0.60926
  -1  -2   462004.74 2622.18   1-0.61845-0.95268 0.45493 0.20925-0.61845-0.60999
   1   2  -460585.00 2590.87   1-0.85874-0.52451-0.15223 0.09345-0.85874-0.86719
   1   2  -443750.73 3017.01   1-0.99376-0.65959 0.42931 0.67382-0.43929-0.44857
   1   2  -5 3475.56  572.79   1-0.93503-0.53929 1.36482 1.76101 0.93503 1.00363
  -1  -2   5 3312.94  632.39   1-0.66921-1.06496 1.64334 1.24717 0.66921 0.60062
  -1  -2   5 3036.05  555.49   1-0.56146-0.95631 0.56690 0.16980-0.56146-0.63101
   1   2  -5 3360.83  618.49   1-0.84784-0.45298-0.11707 0.28005-0.84784-0.77828
  -1  -2   5 2136.15  657.48   1-0.70264-1.09724 1.55303 1.15656 0.51130 0.44273
   1   2  -5 2686.32  580.64   1-0.99443-0.59960 0.28670 0.68251-0.53358-0.46507
   1   2  -614639.09 1189.17   1-0.98105-0.52449 1.17335 1.72094 0.98105 1.12753
  -1  -2   612614.90 1309.15   1-0.70247-1.15902 1.63273 1.08514 0.70247 0.55599
   1   2  -612790.50 1469.12   1-0.32923 0.12656-0.97073-0.42362-1.32770-1.18149
  -1  -2   611963.92 1264.66   1-0.51038-0.96587 0.66055 0.11199-0.51038-0.65795
   1   2  -613105.75 1226.00   1-0.85141-0.39593-0.12848 0.42009-0.85141-0.70385
  -1  -2   612523.35 1325.10   1-0.73357-1.18882 1.50355 0.95570 0.45629 0.30992
   1   2  -611863.67 1167.30   1-0.99053-0.53504 0.16779 0.71488-0.60897-0.46268
   1   2  -768411.12 3088.14   1-0.99484-0.47747 0.97373 1.67276 0.99484 1.21922
  -1  -2   760451.15 2534.78   1-0.71257-1.22994 1.62869 0.92967 0.71257 0.48820
   1   2  -751651.33 3484.95   1-0.46049 0.05592-0.76726-0.06888-1.24717-1.02319
  -1  -2   760850.20 2817.01   1-0.46153-0.97765 0.74485 0.04484-0.46153-0.68711
   1   2  -767347.95 2561.79   1-0.86198-0.34587-0.16292 0.53709-0.86198-0.63640
  -1  -2   762556.43 3707.50   1-0.73192-1.24779 1.50634 0.80709 0.45931 0.23514
   1   2  -761372.68 2777.08   1-0.98311-0.46696 0.05405 0.75243-0.67840-0.45432
   1   2  -844755.67 2360.97   1-0.98573-0.40755 0.77249 1.62291 0.98573 1.28798
  -1  -2   838285.20 2332.84   1-0.70645-1.28463 1.63118 0.78075 0.70645 0.40420
  -1  -2   838417.20 2357.05   1-0.41330-0.99004 0.82347-0.02797-0.41330-0.71689
  -1  -2   840798.12 2952.14   1-0.71559-1.29209 1.53298 0.68234 0.48870 0.18673
   1   2  -841237.66 2151.45   1-0.97219-0.39538-0.05896 0.79071-0.74480-0.44294
   1   2  -932542.69 2398.66   1-0.95853-0.32046 0.56779 1.57060 0.95853 1.33982
  -1  -2   926256.64 2114.91   1-0.68753-1.32653 1.63798 0.63614 0.68753 0.30739
  -1  -2   916057.12 2483.39   1-0.42227-1.05967 1.63719 0.63473 1.27393 0.89360
  -1  -2   926982.80 2307.90   1-0.36485-1.00223 0.89824-0.10464-0.36485-0.74645
  -1  -2   927029.85 2613.68   1-0.69019-1.32732 1.57148 0.56945 0.53247 0.15270
  -1  -2  10 9414.64 1309.02   1-0.31568-1.01368 0.97005-0.18427-0.31568-0.77529
  -1  -2  10 8808.67 1397.52   1-0.65782-1.35558 1.61588 0.46247 0.58518 0.12762
   1   1   8  313.23  276.06   1-0.90239-1.35693 1.43635 0.01718 0.59238-0.25218
   1   1   8  196.04  196.20   1-0.16379-0.61821 1.16829-0.25031-0.16379-1.00948
   1   1   8  213.33  205.34   1-0.77851-1.23318 1.42107 0.00263 0.36939-0.47457
   1   1   710094.98 1318.90   1-0.93199-1.32588 1.36774 0.10002 0.49229-0.27440
   1   1   710644.09 1248.36   1-0.20042-0.59420 1.12358-0.14354-0.20042-0.96809
   1   1   710153.37 1427.11   1-0.81013-1.20416 1.35380 0.08674 0.30218-0.46399
  -1  -1  -6 1238.36  366.80   1-0.48486-0.15187-0.70518 0.41136 0.48486 1.17469
   1   1   6 1130.52  429.20   1-0.99184-1.32614 1.06534-0.05070 0.99184 0.30270
   1   1   6 1028.49  469.33   1-0.95467-1.28793 1.29610 0.17985 0.39590-0.29293
  -1  -1  -6 1084.98  376.16   1-0.84108-0.50765 0.07657 1.19223-0.75148-0.06293
   1   1   6 1091.36  379.61   1-0.23254-0.56569 1.08282-0.03289-0.23254-0.92220
   1   1   6 1051.32  471.35   1-0.83822-1.17162 1.28602 0.17036 0.23720-0.45117
  -1  -1  -559950.47 2587.40   1-0.50625-0.23391-0.66787 0.29716 0.50625 1.11807
   1   1   549055.67 2694.67   1-0.99283-1.26631 0.87515-0.08947 0.99283 0.38158
   1   1   547382.77 2610.05   1-0.97134-1.24408 1.22327 0.25894 0.30422-0.30652
  -1  -1  -546263.71 2357.04   1-0.87873-0.60597 0.20142 1.16575-0.65971-0.04896
   1   1   553948.73 2587.31   1-0.25869-0.53122 1.04847 0.08421-0.25869-0.87035
  -1  -1  -555889.97 2411.83   1-0.74766-0.47513 0.16355 1.12780-0.74766-0.13601
   1   1   553114.60 3199.35   1-0.86289-1.13566 1.21871 0.25445 0.17501-0.43555
  -1  -1  -556866.14 2401.44   1-0.99309-0.72031 0.23084 1.19476-0.56936 0.04117
  -1  -1  -410628.65 1018.40   1-0.50574-0.29405-0.66876 0.14473 0.50574 1.03955
   1   1   410626.45 1302.23   1-0.96890-1.18059 0.63276-0.18074 0.96890 0.43509
   1   1   4 9218.97 1070.72   1-0.98292-1.19500 1.15033 0.33733 0.21745-0.31549
  -1  -1  -410309.10 1083.03   1-0.91035-0.69827 0.32093 1.13394-0.56750-0.03455
   1   1   4 9783.55 1087.97   1-0.27610-0.48800 1.02505 0.21224-0.27610-0.80974
  -1  -1  -410221.84  965.66   1-0.70048-0.48858 0.27702 1.08985-0.70048-0.16684
  -1  -1  -410535.24 1079.12   1-0.99486-0.78274 0.33360 1.14622-0.50305 0.02970
  -1  -1  -373451.14 2484.84   1-0.47216-0.32113-0.72692-0.06491 0.47216 0.92797
   1   1   382209.81 2941.55   1-0.90595-1.05698 0.32125-0.34075 0.90595 0.45014
   1   1   382084.23 2831.57   1-0.99007-1.14147 1.08027 0.41861 0.13803-0.31711
  -1  -1  -382830.44 2628.58   1-0.93635-0.78495 0.43494 1.09660-0.47543-0.02028
   1   1   379630.25 2912.80   1-0.27895-0.43022 1.02118 0.35980-0.27895-0.73458
  -1  -1  -380569.90 2892.47   1-0.64165-0.49038 0.40678 1.06815-0.64165-0.18602
   1   1   374537.25 3125.16   1-0.90170-1.05321 1.09278 0.43127 0.06398-0.39099
  -1  -1  -383490.67 2825.30   1-0.99361-0.84214 0.43514 1.09646-0.43535 0.01961
  -1  -1  -2 2088.78  435.93   1-0.38170-0.29133-0.87269-0.36220 0.38170 0.75951
   1   1   2 1945.22  448.55   1-0.77073-0.86110-0.10438-0.61487 0.77073 0.39292
  -1  -1  -2 2436.80  471.57   1-0.95700-0.86627 0.54274 1.05308-0.38448-0.00713
   1   1   2 2087.91  513.48   1-0.25320-0.34385 1.05578 0.54582-0.25320-0.63083
  -1  -1  -2 2081.69  428.99   1-0.56015-0.46950 0.56939 1.07932-0.56015-0.18252
   1   1   2 2238.95  504.85   1-0.91496-1.00583 1.04204 0.53194 0.02098-0.35619
  -1  -1  -2 2339.68  498.41   1-0.98929-0.89849 0.53615 1.04618-0.36577 0.01140
  -1  -1  -1 1897.98  413.92   1-0.18984-0.16012-1.13670-0.77772 0.18984 0.48964
   1   1   1 1703.47  451.35   1-0.50098-0.53070-0.67716-1.03615 0.50098 0.20117
   1   1   1 1625.12  416.46   1-0.99477-1.02482 0.97070 0.61172 0.02023-0.27931
  -1  -1  -1 2006.89  407.14   1-0.97252-0.94246 0.64270 1.00168-0.29657 0.00297
   1   1   1 1536.90  500.80   1-0.15627-0.18629 1.17722 0.81872-0.15627-0.45589
  -1  -1  -1 1739.37  383.83   1-0.42184-0.39183 0.80986 1.16837-0.42184-0.12223
   1   1   1 1706.04  460.07   1-0.92185-0.95208 1.01362 0.65490-0.00271-0.30209
  -1  -1  -1 1973.93  411.43   1-0.98168-0.95153 0.63830 0.99704-0.29304 0.00634
  -1  -1   043185.76 2059.04   1 0.14132 0.11039-1.46840-1.26096-0.14132 0.08047
   1   1   035949.03 1928.53   1-0.99485-0.96424 0.95968 0.75204 0.00877-0.21297
  -1  -1   043335.06 2064.20   1-0.98306-1.01367 0.73059 0.93823-0.21620 0.00553
   1   1   045116.79 2085.49   1-0.91408-0.88368 1.04557 0.83824 0.02395-0.19763
   1   1  -1180899.4 4193.49   1-0.52127-0.42985 1.65049 1.59440 0.52127 0.37734
   1   1  -1192922.6 5697.55   1-0.99253-0.90124 1.04244 0.98613 0.09653-0.04740
   1   1  -1179721.2 4936.23   1-0.85346-0.76232-1.51762-1.57329-0.85346-0.99710
   1   1  -1183110.9 4787.73   1-0.82044-0.72941 1.32989 1.27392 0.27896 0.13517
   1   1  -217291.45 1271.08   1-0.78552-0.63329 1.58607 1.68138 0.78552 0.71947
  -1  -1   218428.28 1257.84   1-0.66852-0.82075 1.64352 1.54821 0.66852 0.73457
   1   1  -222268.28 2172.98   1-0.89377-0.74194 1.45287 1.54832 0.61796 0.55205
   1   1  -220257.44 1440.30   1-0.96627-0.81440-0.61534-0.51951-0.96627-1.03185
  -1  -1   210659.58 1642.49   1-0.99259-1.14443 0.46670 0.37158-0.41385-0.34781
   1   1  -219029.85 1448.02   1-0.29301-0.14118-1.66943-1.57431-1.31093-1.37697
   1   1  -3113729.5 3480.80   1-0.91971-0.70666 1.40342 1.65016 0.91971 0.93155
   1   1  -3119085.6 3940.16   1-0.89793-0.68543-0.29018-0.04290-0.89793-0.88550
  -1  -1   398529.79 3712.47   1-0.94674-1.15903 0.89477 0.64795-0.09897-0.11078
   1   1  -4 9354.35  912.84   1-0.97741-0.70354 1.19732 1.59546 0.97741 1.06713
  -1  -1   4 8164.94  933.81   1-0.83584-1.10970 1.53888 1.14071 0.83584 0.74611
  -1  -1   4 4558.94 1317.90   1-0.92793-1.20104 1.37848 0.98012 0.50739 0.41757
   1   1  -4 7370.62 1050.24   1-0.40146-0.12814-0.86258-0.46490-1.28733-1.19787
   1   1  -4 9107.73  972.46   1-0.87010-0.59698-0.19020 0.20850-0.87010-0.77967
  -1  -1   4 7398.43 1325.55   1-0.92193-1.19485 1.01327 0.61507-0.00300-0.09261
   1   1  -4 8987.98  914.62   1-0.97973-0.70658 0.01496 0.41267-0.70166-0.61212
   1   1  -517353.57 1215.77   1-0.99457-0.65989 0.99617 1.54574 0.99457 1.16218
  -1  -1   520528.23 1534.89   1-0.85184-1.18652 1.51969 0.97012 0.85184 0.68423
  -1  -1   514583.29 1884.97   1-0.92713-1.26087 1.38052 0.83071 0.51029 0.34261
   1   1  -515420.45 1329.05   1-0.57331-0.23932-0.56517-0.01615-1.14986-0.98260
   1   1  -518752.33 1372.50   1-0.86419-0.53044-0.17027 0.37988-0.86419-0.69574
  -1  -1   519635.93 1548.37   1-0.89730-1.23085 1.10860 0.55903 0.07759-0.08980
   1   1  -517498.69 1337.00   1-0.97932-0.64551 0.01054 0.55954-0.70427-0.53694
   1   1  -633983.12 2010.10   1-0.98843-0.59293 0.80415 1.50512 0.98843 1.23392
  -1  -1   631337.67 2062.95   1-0.85081-1.24631 1.52101 0.82003 0.85081 0.60531
   1   1  -624079.25 2379.88   1-0.58861-0.19394-0.53547 0.16486-1.13429-0.88924
   1   1  -631590.61 1995.61   1-0.86909-0.47470-0.18675 0.51485-0.86909-0.62263
  -1  -1   626559.72 2179.20   1-0.87061-1.26479 1.19587 0.49490 0.15438-0.09082
   1   1  -630467.71 2082.88   1-0.97411-0.57964-0.04143 0.65885-0.73467-0.48956
   1   1  -7 7160.45  968.56   1-0.96641-0.51088 0.61623 1.46933 0.96641 1.29064
  -1  -1   7 7413.24 1086.37   1-0.83863-1.29493 1.53571 0.68329 0.83863 0.51524
  -1  -1   7 6114.26  949.21   1-0.87109-1.32611 1.49093 0.63819 0.67966 0.35624
   1   1  -7 6095.91 1048.69   1-0.55993-0.10459-0.59065 0.26102-1.16296-0.84011
  -1  -1   7 6533.46  891.46   1-0.48445-0.93946 0.70590-0.14713-0.48445-0.80892
  -1  -1   7 7672.63 1093.74   1-0.84117-1.29600 1.27838 0.42602 0.23002-0.09297
   1   1  -7 5829.51  800.14   1-0.96549-0.51036-0.11484 0.73674-0.77669-0.45380
   1   1  -8 4396.39  638.34   1-0.93278-0.41660 0.43532 1.43994 0.93278 1.33501
  -1  -1   8 4130.61  791.87   1-0.81750-1.33464 1.55816 0.55433 0.81750 0.41623
  -1  -1   8 3050.46  742.57   1-0.82582-1.34147 1.54925 0.54504 0.78460 0.38331
  -1  -1   8 4103.86  673.37   1-0.43026-0.94590 0.79631-0.20815-0.43026-0.83274
  -1  -1   8 3668.09  834.03   1-0.80861-1.32407 1.35722 0.35347 0.30553-0.09526
   1   1  -8 3640.62  694.77   1-0.95353-0.43774-0.20050 0.80236-0.82436-0.42368
  -1  -1   9 5718.53  972.54   1-0.78797-1.36591 1.58416 0.42891 0.78797 0.30881
  -1  -1   9 3369.89  828.49   1-0.76656-1.34284 1.60126 0.44560 0.89684 0.41769
  -1  -1   9 5623.25  764.47   1-0.37685-0.95311 0.88010-0.27581-0.37685-0.85734
  -1  -1   9 5556.93  932.30   1-0.77259-1.34868 1.43274 0.27762 0.38137-0.09721
  -1  -1  10 8590.53 1170.23   1-0.32341-0.96030 0.95902-0.34833-0.32341-0.88191
  -1  -1  10 7955.82 1323.65   1-0.73272-1.36943 1.50499 0.19849 0.45786-0.09852
   1   0   9 5882.28 1177.31   1-0.81995-1.39621 1.55546 0.13804 0.79681-0.02679
   1   0   9 6465.16  980.31   1-0.13313-0.70928 1.20422-0.21278-0.13313-0.95794
   1   0   9 7074.49 1082.76   1-0.71225-1.28859 1.53823 0.12152 0.49458-0.32835
   1   0   8 4388.06  820.46   1-0.86027-1.37591 1.50674 0.24078 0.70668-0.03906
   1   0   8 4722.77  855.27   1-0.16947-0.68499 1.16149-0.10407-0.16947-0.91626
   1   0   8 4724.71  901.83   1-0.74488-1.26059 1.48407 0.21875 0.43525-0.30988
   1   0   724114.57 1917.85   1-0.92662-1.38279 1.38685 0.27279 0.92662 0.25861
   1   0   724865.53 2082.91   1-0.89227-1.34727 1.45564 0.34114 0.62230-0.04557
   1   0   726221.76 1884.63   1-0.20131-0.65620 1.12247 0.00837-0.20131-0.87010
   1   0   724826.11 2266.12   1-0.77326-1.22835 1.43142 0.31749 0.38001-0.28732
  -1   0  -6 4824.37  742.03   1-0.60808-0.21386-0.47593 0.48730 0.60808 1.19896
   1   0   6 4394.10  818.59   1-0.91716-1.31151 1.40472 0.44168 0.54513-0.04487
  -1   0  -6 4927.19  802.52   1-0.90261-0.50811 0.29010 1.25247-0.59170-0.00203
   1   0   6 5115.20  865.52   1-0.22736-0.62162 1.08949 0.12682-0.22736-0.81813
   1   0   6 4956.92  806.92   1-0.79725-1.19171 1.38223 0.41967 0.33023-0.25931
  -1   0  -6 5079.78  743.88   1-0.99487-0.60041 0.33821 1.30020-0.50002 0.08947
  -1   0  -560025.38 3020.70   1-0.63792-0.30435-0.41463 0.39708 0.63792 1.15079
   1   0   546706.43 3060.84   1-0.98458-1.31912 1.14630 0.33509 0.98458 0.47235
   1   0   548466.96 2897.34   1-0.93578-1.26951 1.35721 0.54562 0.47767-0.03447
  -1   0  -555190.49 2948.13   1-0.93924-0.60541 0.44887 1.25990-0.46389 0.04798
   1   0   549993.58 2889.64   1-0.24524-0.57888 1.06626 0.25504-0.24524-0.75801
   1   0   555038.06 3161.28   1-0.81636-1.15017 1.33946 0.52831 0.28823-0.22351
  -1   0  -557788.50 3013.32   1-0.99236-0.65855 0.47292 1.28364-0.40959 0.10213
  -1   0  -423767.82 1527.72   1-0.64586-0.37294-0.39788 0.26232 0.64586 1.08072
   1   0   422744.86 1905.29   1-0.99483-1.26856 0.97586 0.31606 0.99483 0.56048
   1   0   421713.64 1777.38   1-0.94854-1.22163 1.31777 0.65766 0.42434-0.00993
  -1   0  -422695.45 1413.01   1-0.96806-0.69490 0.61142 1.27110-0.32447 0.10960
   1   0   420132.35 1773.30   1-0.25035-0.52335 1.05954 0.39976-0.25035-0.68510
  -1   0  -424197.99 1416.38   1-0.98353-0.71039 0.61714 1.27654-0.30831 0.12561
  -1   0  -322813.19 1548.58   1-0.61210-0.39984-0.46783 0.04086 0.61210 0.96896
   1   0   325279.41 1737.04   1-0.98095-1.19386 0.72555 0.21717 0.98095 0.62449
   1   0   321687.28 1590.15   1-0.95518-1.16763 1.29420 0.78554 0.39344 0.03702
  -1   0  -323954.98 1484.17   1-0.98782-0.77534 0.78256 1.29092-0.16723 0.18903
   1   0   323534.05 1702.78   1-0.23266-0.44503 1.08264 0.57432-0.23266-0.58940
  -1   0  -323562.99 1499.15   1-0.96559-0.75304 0.77821 1.28659-0.18933 0.16681
  -1   0  -2309824.6 6112.52   1-0.46348-0.31187-0.74157-0.38441 0.46348 0.74234
   1   0   2259767.8 7546.95   1-0.88634-1.03795 0.24721-0.10996 0.88634 0.60748
  -1   0  -2306853.2 6468.00   1-0.99477-0.84297 0.97058 1.32760 0.02010 0.29857
   1   0   2259000.1 6537.88   1-0.16667-0.31842 1.16483 0.80792-0.16667-0.44541
  -1   0  -2271887.1 6407.08   1-0.39911-0.24736 0.84580 1.20271-0.39911-0.12037
   1   0   2283215.4 6908.69   1-0.82041-0.97232 1.32996 0.97295 0.27904 0.00068
  -1   0  -128536.15 1904.73   1 0.07236 0.16331-1.41171-1.20608-0.07236 0.12848
   1   0   122225.60 1714.54   1-0.36137-0.45232-0.90346-1.10911 0.36137 0.16051
   1   0   126600.93 1774.35   1-0.93270-1.02388 1.36578 1.16004 0.48957 0.28888
  -1   0  -127016.91 1603.78   1-0.97716-0.88603 1.19020 1.39589 0.26432 0.46499
   1   0   127671.05 2417.19   1 0.02744-0.06367 1.37128 1.16583 0.02744-0.17327
  -1   0  -128937.55 1856.77   1-0.13899-0.04787 1.19746 1.40292-0.13899 0.06173
   1   0   131762.94 2320.67   1-0.76218-0.85347 1.45265 1.24704 0.40202 0.20147
  -1   0  -131250.34 1994.51   1-0.85279-0.76150 1.24725 1.45288 0.20112 0.40168
  -1   0   019837.62 1429.33   1-0.66044-0.62998 1.64551 1.69963 0.66044 0.78324
   1   0   020930.60 1534.80   1-0.83962-0.87017 1.53351 1.47923 0.75472 0.63190
  -1   0   024075.72 1676.63   1-0.89039-0.85984 1.45903 1.51332 0.62766 0.75048
  -1   0   023153.87 1494.94   1-0.57489-0.54433-1.65451-1.60053-0.57489-0.45222
   1   0   022352.21 1785.88   1-0.47837-0.50893-1.64267-1.69666-0.47837-0.60105
   1   0   020615.62 1607.23   1-0.51244-0.54309 1.76396 1.70974 0.78818 0.66542
  -1   0   021876.22 1597.63   1-0.60580-0.57515 1.67768 1.73191 0.66362 0.78638
   1   0  -143594.35 2027.67   1-0.95306-0.92270 1.30867 1.40596 0.95306 0.90815
  -1   0   145830.08 2202.81   1-0.91526-0.94562 1.41346 1.31617 0.91526 0.96018
   1   0  -146317.16 2511.13   1-0.39166-0.36156 1.62672 1.72390 1.29334 1.24839
  -1   0   145232.21 2183.55   1-0.99481-1.02488-0.97822-1.07560-0.99481-0.95007
   1   0  -152106.80 2942.20   1-0.98653-0.95646-1.12900-1.03161-0.98653-1.03128
   1   0  -147056.24 2078.36   1-0.28635-0.25619-1.67549-1.57847-1.31008-1.35509
   1   0  -2 6970.20  797.84   1-0.99123-0.90006 1.07478 1.32350 0.99123 1.02420
  -1   0   2 6658.33  729.84   1-0.95791-1.04908 1.29077 1.04205 0.95791 0.92493
  -1   0   2 6726.21  828.12   1 0.11499 0.02426 1.24318 0.99455 1.39753 1.36462
  -1   0   2 6502.50  834.58   1-0.51416-0.60505-0.67462-0.92293-1.20449-1.23722
  -1   0   2 4633.73  898.12   1-0.89219-0.98295-0.26863-0.51749-0.89219-0.92550
   1   0  -2 7113.54 1140.79   1-0.95596-0.86519-0.55304-0.30418-0.95596-0.92265
   1   0  -2 7408.09  914.02   1-0.84426-0.75345-0.68958-0.44125-1.06672-1.03393
   1   0  -320444.49 1492.97   1-0.99336-0.84138 0.88772 1.28785 0.99336 1.10423
  -1   0   319538.70 1327.59   1-0.96529-1.11728 1.26021 0.86009 0.96529 0.85443
  -1   0   319884.21 1685.04   1-0.88226-1.03383 0.21399-0.18565-0.65021-0.76075
   1   0  -321598.35 1591.62   1-0.47012-0.31855-0.75107-0.35143-1.23996-1.12943
  -1   0   321152.36 1593.65   1-0.77730-0.92869 0.08701-0.31329-0.77730-0.88862
   1   0  -320963.88 1656.56   1-0.90948-0.75809-0.33532 0.06498-0.90948-0.79816
  -1   0   320124.69 1545.15   1-0.99470-1.14618 0.37634-0.02327-0.47482-0.58538
   1   0  -321437.14 1700.46   1-0.93571-0.78424-0.30746 0.09216-0.88177-0.77120
   1   0  -4 6354.74  809.77   1-0.98071-0.76790 0.72336 1.27491 0.98071 1.16946
  -1   0   4 6833.97  945.72   1-0.96217-1.17498 1.27365 0.72212 0.96217 0.77343
  -1   0   4 5410.11  810.34   1-0.97384-1.18608 0.65250 0.10151-0.28775-0.47609
   1   0  -4 6318.67  896.02   1-0.58052-0.36828-0.55125-0.00027-1.14260-0.95427
  -1   0   4 5281.95  741.36   1-0.68891-0.90094 0.30349-0.24825-0.68891-0.87824
   1   0  -4 6809.23  769.44   1-0.88981-0.67779-0.25987 0.29187-0.88981-0.70048
  -1   0   4 6640.79  921.48   1-0.97953-1.19166 0.66093 0.11003-0.27660-0.46495
   1   0  -4 5768.01  729.55   1-0.95473-0.74260-0.19252 0.35838-0.81998-0.63163
   1   0  -531100.50 1791.26   1-0.95841-0.68543 0.56712 1.27050 0.95841 1.22557
  -1   0   529412.99 1711.09   1-0.95302-1.22663 1.30881 0.60586 0.95302 0.68639
  -1   0   520497.24 1726.64   1-0.99450-1.26742 0.91345 0.21113-0.03864-0.30478
   1   0  -527912.85 1794.92   1-0.60547-0.33255-0.50204 0.20028-1.11641-0.85027
  -1   0   527004.87 1773.36   1-0.61592-0.88857 0.46007-0.24311-0.61592-0.88326
   1   0  -525711.95 1931.67   1-0.88593-0.61328-0.24571 0.45748-0.88593-0.61859
  -1   0   527419.83 2262.06   1-0.95470-1.22721 0.84942 0.14670-0.13458-0.40082
   1   0  -526951.70 1613.20   1-0.95718-0.68439-0.17589 0.52631-0.81082-0.54468
   1   0  -628013.56 1729.46   1-0.92897-0.59534 0.41801 1.27292 0.92897 1.27415
  -1   0   628214.11 1756.56   1-0.93857-1.27301 1.35487 0.50049 0.93857 0.59405
  -1   0   625463.26 2144.61   1-0.98854-1.32212 1.09862 0.24498 0.15850-0.18543
   1   0  -624959.40 2255.96   1-0.59371-0.26013-0.52543 0.32823-1.12896-0.78502
  -1   0   626022.28 1946.73   1-0.55124-0.88453 0.58611-0.26852-0.55124-0.89660
   1   0  -625318.90 2103.59   1-0.89061-0.55733-0.26279 0.59184-0.89061-0.54526
  -1   0   624357.97 1873.45   1-0.92575-1.25890 0.99679 0.14269-0.01662-0.36065
   1   0  -627137.72 1702.55   1-0.95289-0.61944-0.20474 0.64873-0.82668-0.48276
   1   0  -731060.73 1918.85   1-0.89259-0.49830 0.27013 1.27655 0.89259 1.31577
  -1   0   734539.32 2107.05   1-0.91862-1.31387 1.40593 0.40013 0.91862 0.49621
  -1   0   725188.62 2207.21   1-0.96740-1.36131 1.24286 0.23693 0.32834-0.09389
  -1   0   732602.16 1827.00   1-0.49109-0.88500 0.69443-0.31164-0.49109-0.91445
  -1   0   734260.46 2389.70   1-0.89383-1.28761 1.12076 0.11528 0.08810-0.33372
   1   0  -731393.80 1861.67   1-0.94424-0.55013-0.25870 0.74608-0.85589-0.43418
   1   0  -8   52.08   99.04   1-0.84912-0.39417 0.12115 1.27908 0.84912 1.35029
  -1   0   8   60.27  117.08   1-0.89259-1.34865 1.45834 0.30113 0.89259 0.39230
  -1   0   8   41.72  103.76   1-0.93352-1.38806 1.36354 0.20614 0.48644-0.01366
  -1   0   8   39.21  116.90   1-0.43331-0.88785 0.79139-0.36612-0.43331-0.93468
  -1   0   8   17.58  112.85   1-0.85894-1.31335 1.23004 0.07318 0.18533-0.31429
  -1   0   9 5975.38  756.63   1-0.37661-0.89178 0.88047-0.42848-0.37661-0.95599
  -1   0   9 6970.90 1074.77   1-0.82080-1.33585 1.32901 0.02077 0.27813-0.29929
   1  -1   9 6995.60 1387.41   1-0.74538-1.38275 1.61492 0.35069 0.93186 0.20707
   1  -1   9 7493.86 1056.90   1-0.13181-0.76907 1.20573-0.05822-0.13181-0.85773
   1  -1   9 7932.29 1247.74   1-0.66493-1.30233 1.60654 0.34296 0.57388-0.15022
   1  -1   8 2900.37  738.20   1-0.78565-1.36239 1.58690 0.47414 0.86315 0.21623
   1  -1   8 3774.75  798.24   1-0.16288-0.73950 1.16936 0.05684-0.16288-0.81079
   1  -1   8 3432.56  835.77   1-0.69230-1.26907 1.56838 0.45619 0.52891-0.11740
   1  -1   7 5808.14  919.92   1-0.81563-1.33287 1.55998 0.59933 0.81563 0.24665
   1  -1   7 5396.48  938.61   1-0.81592-1.33203 1.55957 0.59827 0.80503 0.23598
  -1   1  -7 5372.84  860.05   1-0.91906-0.40281 0.35715 1.31754-0.53870 0.02989
   1  -1   7 6127.06  900.09   1-0.18812-0.70411 1.13882 0.17774-0.18812-0.75801
   1  -1   7 7491.56 1073.24   1-0.71377-1.22990 1.53584 0.57504 0.49191-0.07659
  -1   1  -6  453.21  249.25   1-0.76557-0.31011-0.11786 0.69205 0.76557 1.25750
   1  -1   6  588.07  303.22   1-0.84873-1.30516 1.52361 0.71436 0.84873 0.35763
   1  -1   6  644.24  329.90   1-0.83657-1.29203 1.53712 0.72728 0.76146 0.27027
  -1   1  -6  882.81  323.13   1-0.95925-0.50368 0.55591 1.36496-0.37310 0.11769
   1  -1   6  786.17  289.79   1-0.20540-0.66077 1.11737 0.30772-0.20540-0.69729
  -1   1  -6  779.99  274.21   1-0.67958-0.22421 0.32449 1.13412-0.67958-0.18770
   1  -1   6  642.94  306.01   1-0.72810-1.18359 1.51271 0.70330 0.46629-0.02441
  -1   1  -6  805.33  383.58   1-0.98665-0.53117 0.57699 1.38579-0.33698 0.15370
  -1   1  -583862.10 4448.22   1-0.81840-0.42360 0.02751 0.68591 0.81840 1.23232
   1  -1   586913.78 4902.67   1-0.86900-1.26461 1.49631 0.83849 0.86900 0.45579
   1  -1   5110873.5 4898.99   1-0.84657-1.24140 1.52497 0.86658 0.73903 0.32570
  -1   1  -597189.08 4808.73   1-0.98630-0.59140 0.76456 1.42228-0.18432 0.22867
   1  -1   5106976.9 5108.78   1-0.21081-0.60554 1.11057 0.45238-0.21081-0.62468
  -1   1  -5112667.9 4848.26   1-0.61530-0.22056 0.46134 1.11954-0.61530-0.20142
   1  -1   5109705.2 5610.85   1-0.73269-1.12756 1.50504 0.84700 0.45791 0.04499
  -1   1  -5100077.9 4700.45   1-0.96921-0.57435 0.75133 1.40937-0.20964 0.20327
  -1   1  -4  436.64  260.50   1-0.86544-0.53129 0.17444 0.68133 0.86544 1.20137
   1  -1   4  408.89  264.03   1-0.86971-1.20449 1.49528 0.98887 0.86971 0.53439
   1  -1   4  445.30  223.87   1-0.84216-1.17636 1.53044 1.02352 0.74904 0.41358
  -1   1  -4  459.25  268.22   1-0.99449-0.66026 0.98875 1.49515 0.03914 0.37434
   1  -1   4  566.76  246.12   1-0.19652-0.53063 1.12845 0.62169-0.19652-0.53238
  -1   1  -4  527.08  238.38   1-0.53151-0.19740 0.62254 1.12929-0.53151-0.19564
   1  -1   4  505.10  254.58   1-0.72182-1.05605 1.52300 1.01634 0.47761 0.14249
  -1   1  -4  501.67  223.77   1-0.93532-0.60109 0.95291 1.45957-0.05243 0.28268
  -1   1  -310350.98 1668.49   1-0.91070-0.63721 0.34024 0.69562 0.91070 1.16863
   1  -1   3 9827.90 1348.89   1-0.81070-1.08466 1.56468 1.20969 0.81070 0.55325
   1  -1   313854.68 1151.33   1-0.81289-1.08644 1.56258 1.20713 0.81114 0.55355
  -1   1  -312617.15 1462.68   1-0.96973-0.69618 1.23149 1.58696 0.31430 0.57190
   1  -1   314256.36 1418.92   1-0.14504-0.41852 1.19043 0.83512-0.14504-0.40289
  -1   1  -317145.08 1334.28   1-0.41091-0.13744 0.82727 1.18257-0.41091-0.15306
  -1   1  -314175.54 1198.02   1-0.87031-0.59671 1.19678 1.55203 0.15519 0.41251
  -1   1  -2 3384.13  784.39   1-0.98471-0.77155 0.76161 0.96519 0.98471 1.16427
  -1   1  -2 3435.94  632.03   1-0.87620-0.66328 1.48297 1.68698 0.66639 0.84612
   1  -1   2 3683.15  927.50   1-0.01134-0.22419 1.33416 1.13028-0.01134-0.19118
  -1   1  -2 3727.57  624.00   1-0.20906 0.00378 1.11277 1.31663-0.20906-0.02922
  -1   1  -2 3963.05  692.89   1-0.73337-0.52040 1.50390 1.70778 0.45666 0.63619
  -1   1  -1284349.5 8469.16   1-0.90879-0.75661 0.33256 0.38491 0.90879 1.01071
   1  -1   1259044.1 6878.66   1-0.51995-0.67224 1.65853 1.60599 1.19951 1.09765
  -1   1  -1254448.3 6718.80   1-0.63801-0.48573 1.65526 1.70779 1.07955 1.18140
  -1   1  -1253616.4 6434.17   1-0.32349-0.17123-1.58533-1.53302-0.32349-0.22178
   1  -1   1275598.1 7141.70   1-0.19154-0.34382-1.50552-1.55788-0.19154-0.29326
   1  -1   1245321.2 7206.26   1-0.27987-0.43221 1.87380 1.82131 1.02932 0.92759
  -1   1  -1240462.0 6125.92   1-0.40873-0.25639 1.82938 1.88188 0.90652 1.00825
   1  -1   031759.11 2145.21   1-0.90694-0.99847 0.32519 0.42435 0.90694 0.88303
  -1   1   031712.79 2023.49   1-0.95283-0.86130 0.53562 0.43647 0.95283 0.97674
   1  -1   036304.12 2064.53   1-0.09552-0.18716 1.44730 1.54621 1.40047 1.37646
  -1   1   037226.92 2140.20   1-0.20812-0.11648 1.53110 1.43218 1.37583 1.39982
  -1   1   030821.19 2277.49   1-0.86856-0.77692-1.49697-1.59603-0.86856-0.84478
   1  -1   036833.90 2386.85   1-0.80507-0.89670-1.56982-1.47075-0.80507-0.82884
  -1   1   035872.58 2229.81   1-0.32658-0.23505-1.63739-1.73633-1.31423-1.29026
   1  -1   040406.55 2405.62   1-0.21768-0.30920-1.73261-1.63362-1.29779-1.32172
   1  -1  -1 6732.32  922.20   1-0.93137-0.96224 0.42888 0.67956 0.93137 0.98547
  -1   1   1 6299.13  912.07   1-0.97420-0.94350 0.67045 0.41976 0.97420 0.92009
   1  -1  -1 6850.77  856.45   1-0.21232-0.24318-1.12786-0.87758-1.37454-1.32073
  -1   1   1 6712.89  919.37   1-0.98232-0.95132-0.73809-0.98854-0.98232-1.03648
   1  -1  -1 7050.09  972.58   1-0.99487-1.02587-0.96488-0.71445-0.99487-0.94071
  -1   1   1 7323.91 1024.94   1-0.80485-0.77399-0.81204-1.06226-1.11865-1.17246
   1  -1  -1 6599.62  802.27   1-0.69590-0.72677-1.08444-0.83421-1.21871-1.16490
   1  -1  -2 7425.55  871.19   1-0.92819-0.89840 0.41449 0.81667 0.92819 1.06028
  -1   1   2 6806.72 1041.33   1-0.70437-0.73419-0.28858-0.69018-0.99361-1.12521
   1  -1  -2 7721.63  836.16   1-0.44798-0.41816-0.78802-0.38641-1.25626-1.12465
  -1   1   2 7071.71  933.50   1-0.87496-0.90462-0.20689-0.60877-0.87496-1.00715
   1  -1  -2 7663.37  817.73   1-0.96036-0.93070-0.57861-0.17671-0.96036-0.82816
   1  -1  -2 7554.80  986.58   1-0.86065-0.83085-0.63323-0.23169-1.04155-0.90994
   1  -1  -3 1150.78  344.15   1-0.91470-0.82426 0.35657 0.91025 0.91470 1.12479
  -1   1   3 1151.98  343.44   1-0.99371-1.08464 0.89711 0.34358 0.99371 0.78383
  -1   1   3  949.17  303.31   1-0.86513-0.95562 0.15451-0.39844-0.69473-0.90414
   1  -1  -3 1176.29  352.83   1-0.55157-0.46108-0.60637-0.05341-1.17094-0.96152
  -1   1   3 1108.11  334.99   1-0.77157-0.86186 0.10217-0.45117-0.77157-0.98178
   1  -1  -3  917.65  318.13   1-0.92786-0.83757-0.41301 0.14032-0.92786-0.71765
  -1   1   3 1159.66  338.89   1-0.99338-1.08384 0.24012-0.31269-0.56346-0.77284
   1  -1  -3  985.58  315.09   1-0.91246-0.82201-0.42436 0.12844-0.94179-0.73241
   1  -1  -4 1841.25  400.84   1-0.89430-0.74320 0.27650 0.98171 0.89430 1.18241
  -1   1   4 1938.49  536.75   1-0.99450-1.14625 0.99946 0.29453 0.99450 0.70674
  -1   1   4 1618.24  405.91   1-0.94498-1.09615 0.47752-0.22676-0.43997-0.72718
   1  -1  -4 1551.69  427.74   1-0.58922-0.43805-0.53428 0.17001-1.13366-0.84645
  -1   1   4 1627.32  437.82   1-0.68639-0.83731 0.30920-0.39559-0.68639-0.97461
  -1   1   4 1760.09  489.80   1-0.99058-1.14169 0.51263-0.19148-0.38217-0.66935
   1  -1  -4 1670.72  392.45   1-0.92939-0.77827-0.34133 0.36278-0.89946-0.61229
   1  -1  -523340.03 1581.78   1-0.86784-0.65609 0.18253 1.03926 0.86784 1.23396
  -1   1   523584.69 1874.60   1-0.98961-1.20217 1.09639 0.24004 0.98961 0.62396
  -1   1   519487.71 1893.54   1-0.98245-1.19429 0.72471-0.13091-0.22167-0.58668
   1  -1  -522974.00 1540.94   1-0.59229-0.38045-0.52824 0.32737-1.13046-0.76545
  -1   1   522663.19 1664.84   1-0.61312-0.82467 0.46575-0.39046-0.61312-0.97935
  -1   1   522505.99 2162.49   1-0.97346-1.18523 0.71706-0.13833-0.23527-0.60022
   1  -1  -520520.89 1748.37   1-0.93270-0.72092-0.32381 0.53157-0.89034-0.52539
   1  -1  -642174.12 2289.73   1-0.83542-0.56301 0.07841 1.08663 0.83542 1.27953
  -1   1   642652.79 2634.11   1-0.97885-1.25223 1.18817 0.18041 0.97885 0.53532
  -1   1   634819.14 2615.05   1-0.99467-1.26718 0.92384-0.08310-0.02807-0.47088
   1  -1  -638841.47 2284.32   1-0.57417-0.30166-0.56352 0.44344-1.14900-0.70618
  -1   1   635862.20 2595.81   1-0.54688-0.81906 0.59425-0.41341-0.54688-0.99112
  -1   1   637263.12 2642.06   1-0.94916-1.22125 0.88149-0.12572-0.10946-0.55232
   1  -1  -634600.13 2517.24   1-0.92890-0.65646-0.34387 0.66281-0.90078-0.45804
   1  -1  -763936.64 3195.93   1-0.79677-0.46371-0.03410 1.12563 0.79677 1.31888
  -1   1   758890.19 2893.36   1-0.96189-1.29609 1.27482 0.11564 0.96189 0.44047
  -1   1   752888.92 3224.77   1-0.98924-1.32243 1.09060-0.06768 0.14952-0.37109
  -1   1   759627.39 2756.29   1-0.48469-0.81749 0.70549-0.45362-0.48469-1.00695
  -1   1   758863.06 3609.53   1-0.91975-1.25248 1.02243-0.13617 0.00460-0.51605
   1  -1  -8 3496.34  638.29   1-0.75137-0.35765-0.15423 1.15702 0.75137 1.35149
  -1   1   8 2683.75  681.49   1-0.96944-1.36289 1.23294-0.07767 0.31608-0.28284
  -1   1   8 3107.52  642.82   1-0.42472-0.81815 0.80525-0.50529-0.42472-1.02498
  -1   1   8 3320.07  741.89   1-0.88618-1.27954 1.14664-0.16334 0.11068-0.48776
  -1   1   9  401.62  280.81   1-0.36578-0.81985 0.89684-0.56514-0.36578-1.04405
  -1   1   9  416.17  340.72   1-0.84864-1.30262 1.25859-0.20279 0.21159-0.46466
   1  -2  10 5007.89  870.06   1-0.08834-0.84733 1.25437-0.00800-0.08834-0.79338
   1  -2  10 4920.42  963.59   1-0.56972-1.32879 1.71448 0.45262 0.71403 0.01095
   1  -2   9 3091.04  918.06   1-0.62438-1.32286 1.65755 0.54652 1.09537 0.46941
   1  -2   9 3773.55  781.24   1-0.11835-0.81671 1.22109 0.11015-0.11835-0.74538
   1  -2   9 3982.10  837.73   1-0.59508-1.29352 1.68911 0.57864 0.67892 0.05364
   1  -2   8 1724.04  527.65   1-0.58811-1.22722 1.65443 0.69575 0.58811 0.04025
   1  -2   8 1374.07  639.74   1-0.65757-1.29542 1.65097 0.69142 1.05580 0.50771
   1  -2   8 1757.81  493.54   1-0.14241-0.78013 1.19349 0.23400-0.14241-0.69142
   1  -2   8 1970.22  584.06   1-0.61262-1.25042 1.67020 0.71111 0.65374 0.10626
  -1   2  -7 2714.64  717.49   1-0.86813-0.29079 0.18351 0.99164 0.86813 1.33913
   1  -2   7 4021.77  749.12   1-0.60584-1.18413 1.65362 0.84635 0.60584 0.13587
   1  -2   7 4257.68  910.40   1-0.67533-1.25253 1.64602 0.83791 1.03315 0.56292
  -1   2  -7 4718.16  691.53   1-0.97166-0.39434 0.63650 1.44360-0.30212 0.16760
   1  -2   7 4480.33  788.74   1-0.15853-0.73562 1.17454 0.36651-0.15853-0.62953
   1  -2   7 4385.97  753.92   1-0.62035-1.19754 1.66149 0.85379 0.64240 0.17271
  -1   2  -7 5131.81  849.23   1-0.98089-0.40373 0.64685 1.45373-0.28685 0.18280
  -1   2  -6 7585.50 1132.08   1-0.93706-0.42037 0.45540 1.11199 0.93706 1.33004
   1  -2   6 6478.55 1015.45   1-0.59190-1.10938 1.65433 0.99848 0.59190 0.19982
   1  -2   6 6824.16 1104.04   1-0.67494-1.19150 1.64614 0.98950 1.03366 0.64130
  -1   2  -6 7711.76  990.83   1-0.99379-0.47714 0.88657 1.54231-0.06570 0.32621
   1  -2   6 7049.47 1193.47   1-0.16327-0.67974 1.16889 0.51231-0.16327-0.55626
  -1   2  -6 8285.30 1087.59   1-0.62498-0.10851 0.44153 1.09814-0.62498-0.23198
   1  -2   6 8038.25 1066.25   1-0.61439-1.13093 1.66821 1.01191 0.65115 0.25927
  -1   2  -6 8684.91 1012.23   1-0.95575-0.43921 0.84303 1.49934-0.13955 0.25233
  -1   2  -518441.33 2042.72   1-0.98790-0.53124 0.79757 1.30198 0.98790 1.30209
   1  -2   517341.80 1532.90   1-0.52474-0.98140 1.65095 1.14652 0.52474 0.21055
   1  -2   519268.75 1878.40   1-0.64943-1.10537 1.65290 1.14772 1.06584 0.75133
  -1   2  -520545.69 1626.61   1-0.98332-0.52734 1.14716 1.65158 0.21378 0.52790
  -1   2  -525410.28 1577.23   1-0.54683-0.09099 0.59433 1.09950-0.54683-0.23185
   1  -2   523254.75 1641.42   1-0.58692-1.04284 1.69752 1.19259 0.69037 0.37628
  -1   2  -526130.70 1910.18   1-0.90842-0.45251 1.06766 1.57258 0.04258 0.35667
   1  -2   492296.64 3168.79   1-0.35241-0.74826 1.59920 1.24620 0.35241 0.11610
   1  -2   4109869.9 3525.41   1-0.58435-0.97965 1.66121 1.30749 1.13868 0.90205
  -1   2  -492731.03 3228.19   1-0.91772-0.52243 1.40343 1.75716 0.54324 0.77988
  -1   2  -4106984.1 3082.86   1-0.44066-0.04545 0.77941 1.13311-0.44066-0.20369
   1  -2   492468.53 3119.34   1-0.52147-0.91675 1.75685 1.40332 0.77694 0.54065
  -1   2  -4106671.7 3376.10   1-0.82126-0.42598 1.32791 1.68146 0.27707 0.51336
  -1   2  -3 8648.08  956.39   1 0.00521 0.33993-1.35025-1.14820-0.00521 0.15375
  -1   2  -3 9550.48 1129.19   1-0.68667-0.35164 1.63827 1.83986 0.68667 0.84509
   1  -2   3 9402.09 1244.65   1-0.45397-0.78863 1.64622 1.44395 1.25195 1.09317
  -1   2  -3 8644.19  954.22   1-0.75687-0.42221 1.60779 1.81006 0.91315 1.07193
  -1   2  -311746.76 1132.11   1-0.27998 0.05459 1.01977 1.22204-0.27998-0.12102
   1  -2   3 9937.11 1056.63   1-0.38260-0.71725 1.84148 1.63933 0.93345 0.77496
  -1   2  -311677.56 1072.23   1-0.65493-0.32028 1.61960 1.82175 0.58973 0.74822
   1  -2   2250622.6 5765.87   1 0.00146-0.27260-1.34664-1.39719-0.00146-0.08243
  -1   2  -2273895.7 6466.30   1-0.40728-0.13321-0.83299-0.78245 0.40728 0.48825
  -1   2  -2246622.8 5385.00   1-0.46789-0.19387 1.64956 1.70035 1.24166 1.32255
  -1   2  -2260180.9 6002.74   1-0.00193 0.27201 1.34336 1.39418-0.00193 0.07901
  -1   2  -2232142.0 6215.88   1-0.22703 0.04693-1.52954-1.47881-0.22703-0.14627
  -1   2  -120461.13 1623.06   1-0.67178-0.45837-0.34180-0.44275 0.67178 0.67475
   1  -2   119596.00 1470.85   1 0.07576-0.13762 1.28586 1.38652 1.40287 1.39984
  -1   2  -125887.74 1762.91   1-0.10224 0.11114 1.45280 1.35215 1.39952 1.40256
  -1   2  -120661.62 1917.33   1-0.65961-0.44628-1.64569-1.74642-0.65961-0.65680
  -1   2  -122408.47 2216.05   1 0.14011 0.35349 1.78570 1.68508 1.27637 1.27927
  -1   2  -120825.10 1759.15   1-0.31612-0.10292-1.64764-1.74848-1.31338-1.31043
   1  -2   024918.94 1522.59   1-0.69265-0.84540-0.29500-0.04254 0.69265 0.76768
  -1   2   028916.82 1742.36   1-0.81215-0.65939 0.00937-0.24309 0.81215 0.73712
  -1   2   025930.85 1850.54   1-0.38016-0.22755-0.89540-1.14764-1.30019-1.37507
   1  -2   034034.20 2259.96   1-0.20816-0.36078-1.13309-0.88085-1.37583-1.30095
  -1   2   027860.23 2025.26   1-0.98094-0.82823-1.17412-1.42623-0.98094-1.05606
  -1   2   027839.11 1852.11   1-0.69262-0.54008-1.09153-1.34366-1.22099-1.29584
   1  -2   031700.97 2095.10   1-0.55288-0.70543-1.34984-1.09770-1.28943-1.21458
   1  -2  -123459.08 1768.65   1-0.76697-0.85907-0.11421 0.28978 0.76697 0.92001
  -1   2   122762.64 1487.46   1-0.89178-0.79968 0.26711-0.13686 0.89178 0.73874
   1  -2  -125116.89 1807.67   1-0.40279-0.49472-0.86050-0.45692-1.28649-1.13381
  -1   2   122957.35 1979.04   1-0.95154-0.85947-0.52863-0.93211-0.95154-1.10462
  -1   2   120903.50 1667.11   1-0.88884-0.79695-0.52645-0.92988-0.99178-1.14442
   1  -2  -125427.32 1867.87   1-0.76282-0.85471-0.92676-0.52334-1.16359-1.01097
   1  -2  -2 3898.70  601.72   1-0.79221-0.82366-0.04669 0.50881 0.79221 1.02326
  -1   2   2 3224.77  735.08   1-0.77174-0.74048-0.12182-0.67674-0.88791-1.11839
   1  -2  -2 4327.35  663.38   1-0.50700-0.53826-0.68733-0.13242-1.21055-0.98007
  -1   2   2 4109.32  702.52   1-0.84635-0.81491-0.11237-0.66731-0.84635-1.07745
   1  -2  -2 3663.35  639.48   1-0.97081-1.00225-0.64591-0.09103-0.97081-0.73982
   1  -2  -2 4319.89  676.23   1-0.85144-0.88267-0.66532-0.11060-1.05597-0.82556
   1  -2  -335788.40 2200.74   1-0.79422-0.76501-0.04116 0.66584 0.79422 1.10327
  -1   2   336792.56 1960.14   1-0.97035-0.99956 0.64268-0.06431 0.97035 0.66131
  -1   2   332501.83 1795.89   1-0.87323-0.90265 0.18219-0.52406-0.67414-0.98243
   1  -2  -333841.10 2061.98   1-0.55605-0.52663-0.59798 0.10828-1.16670-0.85840
  -1   2   332141.54 2093.62   1-0.75100-0.78019 0.15515-0.55122-0.75100-1.06010
   1  -2  -332895.17 1801.58   1-0.94793-0.91874-0.50948 0.19689-0.94793-0.63883
   1  -2  -335839.87 1700.19   1-0.88858-0.85914-0.52749 0.17852-0.99228-0.68408
   1  -2  -489354.76 4341.18   1-0.78261-0.69274-0.07281 0.78569 0.78261 1.16965
  -1   2   4106956.6 5621.35   1-0.98768-1.07836 0.79478-0.06357 0.98768 0.60089
  -1   2   491828.40 4463.73   1-0.93673-1.02682 0.43676-0.42082-0.47392-0.86001
   1  -2  -498952.57 4289.16   1-0.57197-0.48188-0.56775 0.28984-1.15120-0.76510
  -1   2   494434.14 4330.68   1-0.66938-0.75920 0.34707-0.51074-0.66938-1.05649
   1  -2  -494285.64 4072.56   1-0.93641-0.84660-0.45233 0.40548-0.93641-0.54930
  -1   2   496534.79 4314.55   1-0.99285-1.08295 0.45948-0.39782-0.41879-0.80477
   1  -2  -496311.82 4068.30   1-0.90320-0.81310-0.46606 0.39124-0.96249-0.57650
   1  -2  -540170.40 1896.83   1-0.76128-0.61076-0.12894 0.88109 0.76128 1.22634
  -1   2   540859.53 2640.85   1-0.99456-1.14607 0.92933-0.08043 0.99456 0.52989
  -1   2   534140.78 2175.12   1-0.97398-1.12475 0.65355-0.35537-0.28680-0.75069
   1  -2  -537495.21 1986.15   1-0.56642-0.41565-0.57834 0.43057-1.15666-0.69278
  -1   2   535130.33 2073.92   1-0.59706-0.74751 0.49794-0.51131-0.59706-1.06219
   1  -2  -535215.76 1865.48   1-0.93354-0.78309-0.43885 0.57042-0.93354-0.46841
  -1   2   537706.84 2716.61   1-0.97997-1.13072 0.65648-0.35212-0.27985-0.74362
   1  -2  -537462.19 2079.67   1-0.90638-0.75563-0.45200 0.55662-0.95555-0.49177
   1  -2  -631960.37 1701.83   1-0.73186-0.52068-0.20262 0.95890 0.73186 1.27491
  -1   2   633339.76 2160.45   1-0.99261-1.20492 1.05173-0.10943 0.99261 0.45006
  -1   2   631967.98 2202.34   1-0.99182-1.20325 0.84167-0.31859-0.11013-0.65182
   1  -2  -632421.06 2420.74   1-0.54530-0.33386-0.61803 0.54223-1.17679-0.63510
  -1   2   631674.85 2228.12   1-0.53048-0.74155 0.62440-0.53628-0.53048-1.07361
  -1   2   632945.47 2188.95   1-0.95905-1.17009 0.82240-0.33793-0.15551-0.69720
   1  -2  -711365.01 1288.13   1-0.69487-0.42304-0.28992 1.02312 0.69487 1.31593
  -1   2   7 9701.14 1290.57   1-0.99400-1.26611 1.00743-0.30415 0.05892-0.56056
  -1   2   710353.65 1166.84   1-0.46728-0.73899 0.73517-0.57697-0.46728-1.08843
  -1   2   711192.83 1455.56   1-0.93213-1.20380 0.96797-0.34375-0.04021-0.65969
  -1   2   813786.28 1513.27   1-0.98230-1.31509 1.15505-0.30786 0.22294-0.47434
  -1   2   815617.68 1403.29   1-0.40595-0.73828 0.83509-0.62850-0.40595-1.10511
  -1   2   817283.94 1565.62   1-0.90025-1.23256 1.09805-0.36505 0.06851-0.62877
   1  -3  1014252.43 1627.48   1-0.48200-1.30212 1.78621 0.67746 0.82491 0.22066
   1  -3   9 3400.92  967.04   1-0.43995-1.19954 1.64246 0.68464 1.26191 0.73477
   1  -3   9 4033.52  873.41   1-0.49499-1.25449 1.77705 0.81969 0.80945 0.28300
   1  -3   8 6729.73  950.11   1-0.35364-1.05381 1.59977 0.79448 0.35364-0.09519
   1  -3   8 6702.79 1295.68   1-0.45536-1.15429 1.64656 0.84020 1.25093 0.80166
   1  -3   8 8258.12 1048.31   1-0.49557-1.19442 1.77662 0.97066 0.80875 0.36010
  -1   3  -8 8688.72 1300.46   1-0.97712-0.27828 0.68439 1.48936-0.25942 0.18920
  -1   3  -736857.29 2696.01   1-0.98658-0.34722 0.78186 1.43573 0.98658 1.35753
   1  -3   732805.62 2349.96   1-0.32966-0.96901 1.58840 0.93455 0.32966-0.04128
   1  -3   729659.19 2342.41   1-0.44564-1.08395 1.64403 0.98913 1.25792 0.88650
  -1   3  -732006.10 2519.41   1-0.99475-0.35635 0.97292 1.62670 0.02254 0.39338
   1  -3   731450.21 2244.04   1-0.10953-0.74773 1.23099 0.57599-0.10953-0.48164
   1  -3   739614.58 2282.88   1-0.47911-1.11733 1.78819 1.13360 0.82831 0.45746
  -1   3  -734771.95 2690.04   1-0.94654-0.30831 0.89586 1.55042-0.09810 0.27274
  -1   3  -610407.40 1269.94   1-0.98519-0.40665 1.14110 1.64355 0.98519 1.27825
   1  -3   610403.28 1302.32   1-0.25990-0.83844 1.55014 1.04770 0.25990-0.03315
   1  -3   611582.50 1370.37   1-0.40485-0.98252 1.63145 1.12801 1.28520 0.99165
  -1   3  -611166.67 1184.13   1-0.96524-0.38757 1.25290 1.75634 0.34085 0.63440
   1  -3   610979.04 1578.19   1-0.09663-0.67421 1.24531 0.74174-0.09663-0.39073
  -1   3  -612274.91 1099.57   1-0.57298 0.00458 0.54494 1.04851-0.57298-0.27888
   1  -3   6 9948.39 1314.40   1-0.43722-1.01481 1.81426 1.31107 0.87589 0.58283
  -1   3  -610233.83 1309.25   1-0.89016-0.31257 1.13335 1.63652 0.09905 0.39210
  -1   3  -5 3961.26  642.81   1 0.13197 0.64923-1.46111-1.10935-0.13197 0.08406
  -1   3  -5 2456.30  569.53   1-0.88002-0.36230 1.47951 1.83054 0.88002 1.09520
   1  -3   5 3557.27  700.33   1-0.32352-0.84055 1.59755 1.24557 1.33050 1.11482
  -1   3  -5 3889.03  734.97   1-0.86534-0.34831 1.49950 1.85148 0.69419 0.90987
   1  -3   5 4089.43  770.24   1-0.05703-0.57397 1.28779 0.93568-0.05703-0.27312
  -1   3  -5 4136.98  623.03   1-0.48054 0.03639 0.71262 1.06473-0.48054-0.26446
   1  -3   5 3768.72  818.13   1-0.35485-0.87182 1.85255 1.50075 0.96089 0.74563
  -1   3  -5 3859.81  675.82   1-0.79077-0.27381 1.39597 1.74778 0.34398 0.55924
  -1   3  -420298.95 1313.84   1-0.05755 0.39905-1.28725-1.08698 0.05755 0.19558
  -1   3  -419581.89 1454.99   1-0.60696-0.15005 1.65353 1.85316 0.60696 0.74425
   1  -3   414480.22 1548.06   1-0.19197-0.64837 1.52021 1.31968 1.38053 1.24270
  -1   3  -419599.34 1991.25   1-0.67118-0.21478 1.64728 1.84780 1.03855 1.17637
   1  -3   419910.85 1580.00   1 0.02954-0.42677 1.37324 1.17255 0.02954-0.10853
  -1   3  -419656.03 1263.90   1-0.35053 0.10577 0.91957 1.12023-0.35053-0.21246
   1  -3   415186.86 1473.38   1-0.20732-0.66365 1.88300 1.68257 1.08806 0.95059
  -1   3  -422064.85 1273.36   1-0.61693-0.16060 1.66536 1.86579 0.64744 0.78490
  -1   3  -343497.14 1977.54   1-0.27827 0.11768-1.02210-0.97335 0.27827 0.33830
  -1   3  -334554.07 2638.11   1-0.19827 0.19778 1.51020 1.55831 0.19827 0.25760
   1  -3   340111.72 2624.78   1-0.01033-0.40609 1.37206 1.32301 1.40689 1.34694
  -1   3  -338118.66 1984.22   1-0.38940 0.00635 1.62589 1.67495 1.29472 1.35467
  -1   3  -340821.66 2220.10   1-0.14734 0.24834 1.18773 1.23698-0.14734-0.08727
  -1   3  -344774.62 2358.02   1-0.20370 0.19196-1.51394-1.46484-0.20370-0.14389
   1  -3   339166.23 2340.65   1 0.03201-0.36368 1.84040 1.79137 1.23385 1.17419
  -1   3  -347604.63 2033.28   1-0.32910 0.06659 1.86125 1.91029 0.98532 1.04498
   1  -3   210693.05 1223.68   1-0.17890-0.51419-1.15007-1.04732 0.17890 0.19687
  -1   3  -210188.85 1028.59   1-0.48191-0.14661-0.71028-0.81303 0.48191 0.46394
  -1   3  -211310.41 1022.20   1-0.08288 0.25223 1.43677 1.33438 1.40208 1.38416
  -1   3  -2 8901.55 1036.61   1-0.20097 0.13405-1.14202-1.24488-1.37795-1.39610
  -1   3  -2 7657.59 1058.08   1-0.52469-0.18966-1.65094-1.75335-0.52469-0.54285
   1  -3   2 9823.31 1113.55   1-0.19574-0.53080-1.50845-1.40617-0.19574-0.17762
  -1   3  -2 9669.38 1148.97   1 0.05984 0.39491 1.82842 1.72606 1.24618 1.22804
  -1   3  -2 9988.53 1074.93   1-0.34651-0.01163-1.61720-1.71996-1.31543-1.33352
  -1   3  -169495.10 2464.05   1-0.64199-0.36735-0.40607-0.66034 0.64199 0.54601
  -1   3  -165937.17 2704.92   1 0.17216 0.44665 1.17710 0.92324 1.38574 1.28996
  -1   3  -167538.71 3200.71   1-0.40569-0.13134-0.85596-1.11018-1.28467-1.38063
  -1   3  -167971.01 2720.30   1-0.89515-0.62074-1.45374-1.70751-0.89515-0.99123
   1  -3   171211.45 3322.86   1-0.66743-0.94183-1.64381-1.39003-0.66743-0.57134
  -1   3  -169617.17 3052.55   1-0.63717-0.36295-1.20348-1.45750-1.25436-1.35023
   1  -3   010795.92 1141.97   1-0.56408-0.77806-0.56194-0.15618 0.56408 0.73805
  -1   3   010050.68 1009.02   1-0.75919-0.54521-0.13431-0.54010 0.75919 0.58521
  -1   3   010065.71 1101.58   1-0.57916-0.36548-0.55389-0.95942-1.14398-1.31773
   1  -3   011524.78 1077.05   1-0.34722-0.56090-0.94462-0.53907-1.31850-1.14473
  -1   3   0 7995.53 1196.95   1-0.99137-0.77759-0.84702-1.25217-0.99137-1.16539
   1  -3   010220.57 1252.53   1-0.94741-1.16119-1.32786-0.92270-0.94741-0.77338
  -1   3   010869.50 1148.65   1-0.82788-0.61431-0.74255-1.14787-1.08966-1.26331
   1  -3   011347.12 1058.45   1-0.65241-0.86597-1.17408-0.76876-1.24609-1.07244
   1  -3  -1218679.1 4511.08   1-0.63545-0.78878-0.41980 0.13749 0.63545 0.88743
  -1   3   1219604.7 4533.29   1-0.84331-0.68998 0.10281-0.45446 0.84331 0.59133
   1  -3  -1223238.3 5104.11   1-0.45348-0.60649-0.77893-0.22204-1.25230-1.00074
  -1   3   1211992.8 4780.47   1-0.90918-0.75601-0.33413-0.89065-0.90918-1.16115
   1  -3  -1218273.5 5056.35   1-0.99487-1.14802-0.95920-0.40265-0.99487-0.74291
  -1   3   1220665.0 5388.53   1-0.92915-0.77625-0.34257-0.89919-0.90010-1.15155
   1  -3  -1246949.4 5622.72   1-0.77372-0.92662-0.89837-0.34174-1.15283-0.90138
   1  -3  -2 3348.88  571.01   1-0.66859-0.76126-0.34881 0.35999 0.66859 0.99858
  -1   3   2 2816.62  578.08   1-0.81505-0.72272-0.00188-0.71011-0.80680-1.13617
   1  -3  -2 3289.62  622.50   1-0.51221-0.60454-0.67810 0.03011-1.20616-0.87680
  -1   3   2 2891.23  603.43   1-0.80838-0.71584 0.00143-0.70654-0.80838-1.13837
   1  -3  -2 3335.48  581.12   1-0.98195-1.07448-0.73467-0.02674-0.98195-0.65206
  -1   3   2 3121.25  586.52   1-0.97631-0.88406-0.02041-0.72833-0.72244-1.05167
   1  -3  -2 3323.69  562.26   1-0.83395-0.92619-0.72327-0.01535-1.08139-0.75216
   1  -3  -3 2251.90  443.67   1-0.67855-0.71057-0.32678 0.53352 0.67855 1.08653
  -1   3   3 2257.98  555.48   1-0.94516-0.91314 0.49521-0.36510 0.94516 0.53717
  -1   3   3 1918.37  480.26   1-0.88790-0.85624 0.23443-0.62511-0.63467-1.04183
   1  -3  -3 2162.70  536.45   1-0.53933-0.57099-0.62904 0.23050-1.18227-0.77512
  -1   3   3 1994.76  592.01   1-0.71919-0.68728 0.23314-0.62625-0.71919-1.12718
   1  -3  -3 2203.45  490.60   1-0.96657-0.99849-0.61730 0.24210-0.96657-0.55858
   1  -3  -3 2249.01  479.67   1-0.86308-0.89467-0.62452 0.23470-1.03759-0.63056
   1  -3  -4 8197.07  840.30   1-0.67304-0.64441-0.33900 0.67282 0.67304 1.15903
  -1   3   4 8074.25 1219.61   1-0.97324-1.00286 0.66331-0.34842 0.97324 0.48744
  -1   3   4 7223.91  897.09   1-0.93874-0.96775 0.44642-0.56446-0.46593-0.95089
   1  -3  -4 7477.18  841.03   1-0.54478-0.51577-0.61899 0.39192-1.17727-0.69230
  -1   3   4 7492.31  966.61   1-0.64093-0.66965 0.40828-0.60256-0.64093-1.12694
   1  -3  -4 7310.42  838.12   1-0.95785-0.92914-0.56388 0.44696-0.95785-0.47185
  -1   3   4 7137.37 1076.23   1-0.99298-1.02206 0.45573-0.55477-0.42135-0.90615
   1  -3  -4 7686.42  898.38   1-0.87558-0.84650-0.57840 0.43210-1.01633-0.53152
   1  -3  -541789.05 2371.07   1-0.65604-0.56675-0.37610 0.78722 0.65604 1.22003
  -1   3   539247.49 2508.23   1-0.98922-1.07966 0.81459-0.34856 0.98922 0.42553
  -1   3   537582.60 2148.01   1-0.97181-1.06150 0.63756-0.52466-0.30117-0.86394
   1  -3  -535840.61 2032.97   1-0.53433-0.44464-0.63823 0.52400-1.18682-0.62405
  -1   3   538498.00 2504.07   1-0.57003-0.65937 0.55060-0.61170-0.57003-1.13405
  -1   3   536465.51 2499.85   1-0.98151-1.07124 0.64011-0.52169-0.29174-0.85433
   1  -3  -610809.75 1267.79   1-0.62952-0.47957-0.43215 0.88270 0.62952 1.27152
  -1   3   6 9333.26 1255.39   1-0.98994-1.14031 0.81104-0.50252-0.13990-0.78047
  -1   3   6 9253.17 1322.43   1-0.50370-0.65368 0.67237-0.64138-0.50370-1.14574
  -1   3   6 9661.46 1159.30   1-0.96230-1.11230 0.80103-0.51242-0.17193-0.81245
   1  -3  -7 5032.07  904.41   1-0.59433-0.38372-0.50335 0.96301 0.59433 1.31434
  -1   3   7 4244.63  805.32   1-0.99478-1.20582 0.96933-0.49555 0.01880-0.69956
  -1   3   7 4361.00  771.59   1-0.44008-0.65068 0.78035-0.68482-0.44008-1.16012
  -1   3   7 4815.69  916.31   1-0.93689-1.14751 0.94535-0.51950-0.05855-0.77686
   1  -4  10 9182.84 1213.98   1-0.03517-0.91636 1.31033 0.35403-0.03517-0.54242
   1  -4  10 8942.99 1358.01   1-0.36266-1.24383 1.84963 0.89401 0.95330 0.44788
   1  -4   9 6814.39 1452.30   1-0.19273-1.01341 1.52072 0.71611 1.38031 0.95199
   1  -4   9 8643.59 1106.17   1-0.04838-0.86894 1.29679 0.49193-0.04838-0.47762
   1  -4   9 8373.70 1289.66   1-0.35687-1.17742 1.85181 1.04758 0.95893 0.53131
   1  -4   8  184.62  203.58   1-0.18591-0.94595 1.51601 0.86286 1.38218 1.03173
   1  -4   8  273.79  217.04   1-0.05072-0.81066 1.29437 0.64094-0.05072-0.40195
   1  -4   8  293.54  237.56   1-0.33189-1.09180 1.86038 1.20754 0.98271 0.63289
  -1   4  -8  247.40  226.75   1-0.94306-0.18316 0.91429 1.56714-0.08346 0.26636
  -1   4  -7 2160.46  484.60   1 0.08151 0.78132-1.41963-0.91813-0.08151 0.19158
  -1   4  -7 1958.10  589.83   1-0.95601-0.25560 1.29795 1.79842 0.95601 1.22794
   1  -4   7 2058.11  586.13   1-0.14778-0.84719 1.48845 0.98675 1.39136 1.11877
  -1   4  -7 1376.66  462.91   1-0.94902-0.24961 1.31617 1.81787 0.42221 0.69480
   1  -4   7 2373.26  642.23   1-0.03750-0.73681 1.30795 0.80598-0.03750-0.31072
  -1   4  -7 2287.07  528.45   1-0.60633 0.09296 0.47946 0.98143-0.60633-0.33311
   1  -4   7 2376.51  597.84   1-0.28019-0.97947 1.87373 1.37228 1.02904 0.75702
  -1   4  -7 1749.65  483.05   1-0.88222-0.18294 1.15960 1.66104 0.12209 0.39411
  -1   4  -6 9263.43  959.99   1-0.00100 0.63814-1.34426-0.99428 0.00100 0.19610
  -1   4  -6 9881.64 1155.43   1-0.82818-0.18859 1.54724 1.89631 0.82818 1.02223
   1  -4   6 9979.74 1325.54   1-0.07640-0.71518 1.43127 1.08105 1.40280 1.20808
  -1   4  -610125.24 1363.70   1-0.82832-0.18955 1.54651 1.89675 0.77930 0.97403
   1  -4   610655.37 1310.98   1-0.00049-0.63917 1.34475 0.99421-0.00049-0.19570
  -1   4  -611626.06 1062.15   1-0.52641 0.11226 0.63179 0.98233-0.52641-0.33120
   1  -4   6 8991.07 1275.18   1-0.19038-0.82902 1.88359 1.53353 1.10075 0.90653
  -1   4  -6 9072.12 1261.67   1-0.77867-0.14003 1.42073 1.77079 0.36905 0.56328
  -1   4  -579456.54 2759.89   1-0.11657 0.46191-1.22309-1.02461 0.11657 0.23367
  -1   4  -563391.39 2699.02   1-0.60109-0.02231 1.65391 1.85155 0.60109 0.71725
   1  -4   573399.53 3489.55   1 0.02785-0.55028 1.33509 1.13632 1.40641 1.28955
  -1   4  -575807.17 3429.59   1-0.62583-0.04769 1.65732 1.85610 1.09371 1.21057
   1  -4   578373.29 3569.72   1 0.07525-0.50279 1.41423 1.21515 0.07525-0.04194
  -1   4  -573451.07 2695.79   1-0.42020 0.15784 0.81250 1.01159-0.42020-0.30300
   1  -4   577749.60 3063.23   1-0.04834-0.62636 1.86681 1.66811 1.19286 1.07642
  -1   4  -577057.75 2926.65   1-0.60901-0.03099 1.67419 1.87286 0.65899 0.77542
  -1   4  -420194.10 1307.85   1-0.25469 0.26314-1.05380-1.00684 0.25469 0.29378
  -1   4  -418747.39 1251.01   1-0.30800 0.20996 1.57735 1.62356 0.30800 0.34627
   1  -4   419330.62 1410.17   1 0.15873-0.35877 1.19304 1.14572 1.38894 1.34994
  -1   4  -415627.12 1660.76   1-0.36596 0.15153 1.61665 1.66395 1.30832 1.34730
  -1   4  -418718.09 1427.99   1-0.26669 0.25072 1.03777 1.08543-0.26669-0.22750
  -1   4  -421717.15 1751.23   1-0.21661 0.30075-1.52267-1.47521-0.21661-0.17776
   1  -4   417853.34 1606.94   1 0.15337-0.36400 1.77747 1.73018 1.28059 1.24196
  -1   4  -418446.15 1514.60   1-0.35147 0.16590 1.85379 1.90108 0.96416 1.00278
   1  -4   326617.03 2020.95   1 0.01876-0.43841-1.36315-1.25861-0.01876 0.02014
  -1   4  -328370.35 1991.41   1-0.39886 0.05831-0.84619-0.95076 0.39886 0.35994
  -1   4  -333084.19 1720.06   1-0.10091 0.35594 1.45172 1.34756 1.39971 1.36083
  -1   4  -328065.55 1640.74   1-0.30396 0.15281-1.00649-1.11135-1.33968-1.37892
  -1   4  -329533.43 1621.93   1-0.02413 0.43265 1.32146 1.21766-0.02413-0.06296
  -1   4  -330869.34 1662.07   1-0.46366-0.00693-1.63912-1.74318-0.46366-0.50278
  -1   4  -331331.74 1892.59   1-0.02229 0.43444 1.85957 1.75548 1.20702 1.16785
  -1   4  -328679.80 1654.73   1-0.39457 0.06198-1.56475-1.66941-1.31582-1.35494
  -1   4  -266074.64 2516.28   1-0.53372-0.13719-0.61849-0.87456 0.53372 0.41680
  -1   4  -269387.16 2872.82   1 0.12207 0.51830 1.23526 0.97964 1.39634 1.27960
  -1   4  -264397.59 2790.68   1-0.44655-0.05045-0.79036-1.04655-1.25726-1.37431
  -1   4  -264461.36 2394.71   1-0.79540-0.39929-1.57816-1.83360-0.79540-0.91245
   1  -4   265410.75 2690.35   1-0.35485-0.75095-1.60032-1.34488-0.35485-0.23780
  -1   4  -260137.18 2941.14   1-0.62077-0.22487-1.23404-1.48999-1.26256-1.37946
   1  -4   259815.12 2753.78   1-0.29925-0.69515-1.66365-1.40769-1.31166-1.19475
   1  -4   181205.34 2953.04   1-0.37145-0.70732-0.88830-0.48071 0.37145 0.56637
  -1   4  -181939.57 3060.48   1-0.65048-0.31461-0.38803-0.79560 0.65048 0.45557
  -1   4  -188007.15 3087.10   1-0.57585-0.24042-0.56028-0.96780-1.14732-1.34215
   1  -4   189005.63 3030.45   1-0.28556-0.62099-1.03190-0.62439-1.34775-1.15293
   1  -4   189717.93 3375.86   1-0.75806-1.09354-1.60515-1.19833-0.75806-0.56308
  -1   4  -190600.17 3555.54   1-0.78882-0.45358-0.85748-1.26473-1.13690-1.33159
   1  -4   0 1466.33  387.15   1-0.47270-0.74791-0.72600-0.16692 0.47270 0.74562
  -1   4   0 1452.90  357.57   1-0.74677-0.47155-0.16579-0.72489 0.74677 0.47385
  -1   4   0 1485.88  404.54   1-0.68624-0.41149-0.33017-0.88902-1.01866-1.29130
   1  -4   0 1627.02  391.20   1-0.39399-0.66874-0.87418-0.31533-1.29193-1.01929
  -1   4   0 1295.50  371.25   1-0.95561-0.68071-0.55108-1.10919-0.95561-1.22846
   1  -4   0 1536.04  448.42   1-0.95304-1.22790-1.30872-0.75052-0.95304-0.68012
  -1   4   0 1575.85  431.75   1-0.89453-0.61994-0.50309-1.06162-0.98055-1.25302
   1  -4  -1 4197.98  676.32   1-0.53251-0.74707-0.62070 0.08990 0.53251 0.88344
   1  -4  -1 4617.28  711.32   1-0.46083-0.67491-0.76670-0.05650-1.24693-0.89648
  -1   4   1 4075.71  670.15   1-0.85703-0.64276-0.14664-0.85620-0.85703-1.20790
   1  -4  -1 4701.54  796.13   1-0.99394-1.20817-1.02047-0.31090-0.99394-0.64309
  -1   4   1 4409.58  678.75   1-0.95418-0.74026-0.19619-0.90601-0.82199-1.17226
   1  -4  -1 4944.08  684.95   1-0.76607-0.97999-0.91839-0.20857-1.16044-0.81018
   1  -4  -2 2230.91  430.24   1-0.56389-0.71780-0.56229 0.29981 0.56389 0.99282
  -1   4   2 2265.29  544.27   1-0.88370-0.72979 0.23769-0.62442 0.88370 0.45477
  -1   4   2 2066.13  464.52   1-0.84882-0.69542 0.10104-0.76047-0.73385-1.16208
   1  -4  -2 2174.00  522.74   1-0.49773-0.65114-0.70363 0.15791-1.21823-0.78998
  -1   4   2 2118.29  556.81   1-0.76157-0.60793 0.12819-0.73281-0.76157-1.19045
   1  -4  -2 2120.30  518.09   1-0.99067-1.14426-0.83574 0.02524-0.99067-0.56188
  -1   4   2 2002.62  454.72   1-0.98392-0.83066 0.06428-0.79683-0.67226-1.10030
   1  -4  -2 2180.04  475.77   1-0.81173-0.96499-0.79184 0.06929-1.11036-0.68230
   1  -4  -331117.48 1734.64   1-0.57533-0.66857-0.54043 0.47321 0.57533 1.08227
  -1   4   331998.72 1936.68   1-0.92901-0.83577 0.41819-0.59543 0.92901 0.42208
  -1   4   329856.14 1941.20   1-0.90443-0.81169 0.29723-0.71565-0.58614-1.09219
   1  -4  -325680.39 2220.53   1-0.51301-0.60574-0.67667 0.33618-1.20547-0.69944
  -1   4   330360.38 1896.15   1-0.67759-0.58458 0.32891-0.68353-0.67759-1.18448
   1  -4  -330289.03 1689.36   1-0.98168-1.07465-0.73218 0.28018-0.98168-0.47496
  -1   4   329407.47 1747.97   1-0.99443-0.90183 0.28700-0.72540-0.53339-1.03922
   1  -4  -330527.55 2076.11   1-0.83559-0.92819-0.71801 0.29441-1.07912-0.57328
   1  -4  -4  699.58  279.91   1-0.57200-0.60459-0.54683 0.61830 0.57200 1.15693
  -1   4   4  630.57  287.68   1-0.96157-0.92897 0.58586-0.57928 0.96157 0.37663
  -1   4   4  621.30  284.10   1-0.94554-0.91348 0.48041-0.68378-0.43754-1.02138
   1  -4  -4  633.46  315.98   1-0.51205-0.54411-0.67839 0.48580-1.20630-0.62246
  -1   4   4  588.32  302.32   1-0.60248-0.57009 0.48715-0.67673-0.60248-1.18738
   1  -4  -4  599.15  242.05   1-0.97565-1.00797-0.68146 0.48229-0.97565-0.39098
   1  -4  -5  252.33  171.67   1-0.55695-0.52889-0.57542 0.74124 0.55695 1.21990
  -1   4   5  334.02  235.88   1-0.97370-1.00232 0.65143-0.66410-0.28871-0.95036
  -1   4   5  244.53  170.60   1-0.53318-0.56142 0.61949-0.69583-0.53318-1.19608
  -1   4   5  233.19  178.50   1-0.98039-1.00910 0.65205-0.66294-0.28307-0.94448
   1  -4  -623619.93 1717.77   1-0.53188-0.44317-0.62185 0.84632 0.53188 1.27283
  -1   4   619528.18 1556.23   1-0.98996-1.07924 0.81125-0.65562-0.13971-0.87916
  -1   4   621692.55 1736.58   1-0.46743-0.55630 0.73491-0.73184-0.46743-1.20835
  -1   4   620828.41 1928.02   1-0.96161-1.05056 0.80573-0.66085-0.16834-0.90769
  -1   4   7 4643.32  824.63   1-0.99485-1.14481 0.96062-0.65757 0.00974-0.80750
  -1   4   7 4974.74  861.49   1-0.40369-0.55319 0.83864-0.77958-0.40369-1.22263
  -1   4   7 5366.49  919.08   1-0.93674-1.08632 0.94609-0.67188-0.05795-0.87510
   1  -5  10 1653.28  492.69   1 0.01345-0.92883 1.35812 0.55487 0.01345-0.39490
   1  -5  10 1630.03  574.54   1-0.20738-1.14960 1.88299 1.08049 1.08801 0.68142
   1  -5   9  156.13  241.85   1 0.07730-0.80447 1.28422 0.63282 1.40270 1.07322
   1  -5   9  248.22  201.11   1 0.01240-0.86925 1.35712 0.70530 0.01240-0.31794
   1  -5   9  208.43  212.02   1-0.17718-1.05876 1.88368 1.23258 1.11039 0.78161
  -1   5  -816450.82 1574.28   1-0.93468-0.11239 1.36579 1.86430 0.93468 1.18549
   1  -5   812721.81 2009.38   1 0.09456-0.72658 1.26568 0.76574 1.40059 1.14897
   1  -5   818433.30 1943.58   1 0.02615-0.79487 1.37007 0.86970 0.02615-0.22618
   1  -5   818769.31 1861.20   1-0.12115-0.94211 1.88025 1.38052 1.14883 0.89783
  -1   5  -817290.51 1942.57   1-0.88421-0.06325 1.15311 1.65285 0.11637 0.36737
  -1   5  -7  500.14  297.27   1-0.10145 0.65957-1.23997-0.89181 0.10145 0.27561
  -1   5  -7  428.64  236.26   1-0.80927-0.04779 1.56600 1.91308 0.80927 0.98218
   1  -5   7  337.51  325.95   1 0.13986-0.62064 1.21502 0.86652 1.39300 1.21923
  -1   5  -7  305.21  273.42   1-0.81076-0.05024 1.56468 1.91317 0.81541 0.98917
   1  -5   7  459.73  300.54   1 0.06147-0.69893 1.40216 1.05324 0.06147-0.11285
  -1   5  -7  443.11  197.94   1-0.57582 0.18458 0.53948 0.88842-0.57582-0.40149
   1  -5   7  427.73  250.39   1-0.03201-0.79233 1.86241 1.51408 1.20183 1.02864
  -1   5  -7  424.07  319.09   1-0.78215-0.02183 1.41374 1.76205 0.36192 0.53511
  -1   5  -6  580.25  232.23   1-0.17497 0.52539-1.15485-0.95818 0.17497 0.27113
  -1   5  -6  583.84  227.92   1-0.61952 0.08112 1.65241 1.84808 0.61952 0.71455
  -1   5  -6  573.28  279.64   1-0.61226 0.08760 1.65913 1.85615 1.10897 1.20486
  -1   5  -6  555.82  214.97   1-0.20996 0.48990-1.13083-0.93494-1.37528-1.27994
   1  -5   6  648.41  346.99   1 0.12981-0.56996 1.45941 1.26192 0.12981 0.03349
  -1   5  -6  602.16  257.87   1-0.48868 0.21109 0.69860 0.89610-0.48868-0.39236
   1  -5   6  599.94  300.41   1 0.09659-0.60310 1.81039 1.61343 1.26101 1.16560
  -1   5  -6  566.15  303.35   1-0.62217 0.07752 1.65940 1.85636 0.63971 0.73511
  -1   5  -518309.17 1464.04   1-0.26723 0.37248-1.03705-0.99189 0.26723 0.28538
  -1   5  -519693.19 1517.12   1-0.38975 0.25008 1.61507 1.65931 0.38975 0.40689
  -1   5  -517025.97 1773.47   1-0.37455 0.26469 1.62014 1.66572 1.30344 1.32149
  -1   5  -518807.97 1381.73   1-0.29716 0.34203-1.01596-0.97144-1.34274-1.32525
  -1   5  -518934.93 1484.66   1-0.37045 0.26869 0.88980 0.93587-0.37045-0.35214
  -1   5  -519837.78 1768.81   1-0.25025 0.38880-1.54426-1.49860-0.25025-0.23239
  -1   5  -518074.66 1531.56   1-0.39194 0.24711 1.83734 1.88289 0.92395 0.94155
  -1   5  -518754.74 1506.87   1-0.26392 0.37496-1.69522-1.65050-1.30677-1.28913
   1  -5   4 4657.47  908.59   1 0.15713-0.42193-1.48048-1.37412-0.15713-0.09728
  -1   5  -4 5062.50  736.00   1-0.37067 0.20838-0.88947-0.99582 0.37067 0.31082
  -1   5  -4 4483.01  714.25   1-0.13849 0.44011 1.48141 1.37551 1.39327 1.33343
  -1   5  -4 5076.68  632.46   1-0.39471 0.18381-0.87306-0.97989-1.29149-1.35180
  -1   5  -4 5034.26  716.51   1-0.19607 0.38245 1.12899 1.02361-0.19607-0.25577
  -1   5  -4 5434.53  752.68   1-0.44907 0.12935-1.63519-1.74092-0.44907-0.50915
  -1   5  -4 5285.60  803.87   1-0.10589 0.47253 1.87825 1.77243 1.15859 1.09840
  -1   5  -4 5059.87  828.65   1-0.45150 0.12673-1.49533-1.60192-1.31151-1.37167
   1  -5   322603.73 1524.86   1-0.04648-0.56489-1.29874-1.04087 0.04648 0.18434
  -1   5  -323350.02 1479.70   1-0.47691 0.04149-0.71883-0.97669 0.47691 0.33905
  -1   5  -324785.61 1488.67   1 0.06375 0.58172 1.29851 1.04114 1.40408 1.26637
  -1   5  -323159.90 1551.21   1-0.49486 0.02298-0.70863-0.96679-1.22056-1.35868
  -1   5  -320109.64 1422.60   1 0.07691 0.59481 1.41567 1.15884 0.07691-0.06079
  -1   5  -323302.55 1472.56   1-0.72675-0.20895-1.62232-1.87945-0.72675-0.86477
  -1   5  -324277.89 1535.48   1-0.62899-0.11141-1.21886-1.47672-1.25854-1.39647
   1  -5   320432.24 1579.45   1-0.18397-0.70164-1.75714-1.49906-1.28944-1.15140
  -1   5  -214550.47 1296.59   1-0.57876-0.12100-0.53379-0.94319 0.57876 0.36290
  -1   5  -214348.88 1212.05   1-0.59108-0.13390-0.53061-0.94011-1.13171-1.34764
   1  -5   214564.55 1143.70   1-0.21964-0.67683-1.11864-0.70918-1.37224-1.15636
  -1   5  -213839.57 1232.17   1-0.95614-0.49897-1.29745-1.70595-0.95614-1.17209
   1  -5   214741.29 1176.15   1-0.45911-0.91628-1.63795-1.22944-0.45911-0.24316
  -1   5  -214893.29 1290.22   1-0.77086-0.31394-0.90589-1.31506-1.15570-1.37143
   1  -5   214421.53 1239.74   1-0.41927-0.87619-1.53564-1.12647-1.31462-1.09889
   1  -5   1  272.70  190.69   1-0.32019-0.71729-0.96364-0.40273 0.32019 0.61406
  -1   5  -1  250.44  170.78   1-0.67139-0.27429-0.34266-0.90355 0.67139 0.37752
  -1   5  -1  193.58  173.46   1-0.67903-0.28252-0.34639-0.90721-1.02830-1.32201
   1  -5   1  229.23  163.27   1-0.33006-0.72656-0.96953-0.40871-1.32728-1.03357
  -1   5  -1  193.25  146.63   1-0.98302-0.58647-0.74477-1.30463-0.98302-1.27690
   1  -5   1  225.90  164.71   1-0.79296-1.18952-1.58016-1.02028-0.79296-0.49908
  -1   5  -1  242.29  177.22   1-0.87041-0.47415-0.59778-1.15822-1.02532-1.31883
   1  -5   1  219.33  167.10   1-0.58280-0.97906-1.30080-0.74037-1.27891-0.98540
   1  -5   044996.71 2071.51   1-0.39762-0.73406-0.84813-0.13573 0.39762 0.76949
  -1   5   036191.99 1968.41   1-0.75235-0.41590-0.15175-0.86414 0.75235 0.38048
  -1   5   039725.23 2181.83   1-0.75642-0.42060-0.16162-0.87377-0.91388-1.28540
   1  -5   040850.26 2091.23   1-0.40371-0.73954-0.85907-0.14691-1.28592-0.91440
  -1   5   039356.53 1971.39   1-0.89562-0.55962-0.28146-0.99260-0.89562-1.26736
   1  -5   036641.22 2050.05   1-0.94660-1.28252-1.33044-0.61918-0.94660-0.57478
  -1   5   040402.91 2154.29   1-0.93406-0.59846-0.31647-1.02820-0.88650-1.25779
   1  -5  -120013.94 1511.69   1-0.44620-0.72199-0.77030 0.09359 0.44620 0.89607
   1  -5  -117869.72 1507.80   1-0.44917-0.72432-0.78605 0.07743-1.25540-0.80609
  -1   5   118372.26 1439.38   1-0.79540-0.52002 0.03791-0.82468-0.79540-1.24515
   1  -5  -119321.30 1538.10   1-0.98933-1.26462-1.09964-0.23701-0.98933-0.53958
  -1   5   118402.48 1482.81   1-0.97126-0.69632-0.06715-0.93018-0.74952-1.19860
   1  -5  -2   45.66  100.60   1-0.47288-0.68801-0.72568 0.28973 0.47288 1.00075
  -1   5   2   31.20   89.63   1-0.87716-0.66203 0.21456-0.80085 0.87716 0.34929
  -1   5   2   32.32   90.91   1-0.87721-0.66273 0.19608-0.81875-0.66372-1.19085
   1  -5  -2   30.77   94.41   1-0.47329-0.68777-0.74572 0.26911-1.23756-0.71044
  -1   5   2   15.96   70.69   1-0.70583-0.49108 0.26462-0.74943-0.70583-1.23361
   1  -5  -2   52.95  101.04   1-0.99477-1.20943-0.94375 0.07027-0.99477-0.46708
  -1   5   2   22.71   84.02   1-0.98976-0.77548 0.15283-0.86150-0.61825-1.14513
   1  -5  -2   26.61  107.21   1-0.78592-1.00020-0.86548 0.14883-1.14005-0.61319
   1  -5  -344813.51 2025.12   1-0.48271-0.63718-0.70890 0.45804 0.48271 1.08859
  -1   5   338705.60 2114.71   1-0.92104-0.76723 0.36563-0.80053-0.53189-1.13681
  -1   5   338529.52 2002.23   1-0.62663-0.47251 0.43813-0.72734-0.62663-1.23240
   1  -5  -338430.83 1865.65   1-0.99159-1.14563-0.85089 0.31452-0.99159-0.38596
  -1   5   343559.35 1949.70   1-0.99487-0.84125 0.34826-0.81736-0.49341-1.09807
   1  -5  -4 1413.30  451.09   1-0.47908-0.57290-0.71513 0.60333 0.47908 1.16296
  -1   5   4 1330.57  366.88   1-0.95443-0.86129 0.52808-0.78942-0.39708-1.07981
  -1   5   4 1283.85  426.07   1-0.55455-0.46105 0.57993-0.73699-0.55455-1.23834
   1  -5  -5 5767.76  969.41   1-0.46416-0.49733-0.74042 0.72953 0.46416 1.22605
  -1   5   5 5078.03  879.99   1-0.97776-0.94530 0.68326-0.78558-0.25985-1.02037
  -1   5   5 5163.86  822.05   1-0.48694-0.45407 0.70161-0.76674-0.48694-1.24873
  -1   5   5 5149.90  723.45   1-0.97725-0.94495 0.68318-0.78501-0.26031-1.02054
   1  -5  -6  259.17  228.37   1-0.43921-0.41172-0.78178 0.83968 0.43921 1.27909
  -1   5   6  247.16  223.02   1-0.99123-1.01944 0.83120-0.78897-0.12036-0.95868
  -1   5   6  249.29  223.26   1-0.42194-0.44970 0.80971-0.81008-0.42194-1.26174
  -1   5   6  240.98  166.27   1-0.95800-0.98590 0.82908-0.79062-0.15036-0.98854
   1  -6  1016487.30 1763.12   1 0.07940-0.92399 1.41781 0.76759 0.07940-0.23006
   1  -6  1014499.98 1995.64   1-0.01819-1.02146 1.85830 1.20892 1.20916 0.90140
   1  -6   9  416.85  270.81   1 0.09371-0.84904 1.42997 0.93121 0.09371-0.13773
   1  -6   9  353.47  276.11   1 0.03679-0.90585 1.83843 1.34045 1.23602 1.00607
  -1   6  -832447.70 2210.84   1-0.80989 0.07345 1.56543 1.91053 0.80989 0.96167
   1  -6   838259.33 2836.74   1 0.12783-0.75430 1.45785 1.11052 0.12783-0.02560
   1  -6   829610.02 3042.15   1 0.11911-0.76288 1.79807 1.45147 1.26926 1.11710
  -1   6  -7 1962.02  485.64   1-0.23353 0.58873-1.08153-0.88667 0.23353 0.30874
  -1   6  -7 1739.44  486.08   1-0.64848 0.17405 1.64806 1.84174 0.64848 0.72237
  -1   6  -7 1737.93  565.92   1-0.62156 0.20005 1.65796 1.85323 1.09858 1.17351
  -1   6  -7 2041.09  485.38   1-0.36191 0.45970-0.92290-0.72901-1.31057-1.23635
  -1   6  -7 2047.79  511.26   1-0.55577 0.26573 0.57764 0.77352-0.55577-0.48034
  -1   6  -7 2570.83  644.22   1-0.19034 0.63101-1.50467-1.30907-0.19034-0.11548
  -1   6  -7 1992.29  601.01   1-0.65012 0.17125 1.62574 1.82096 0.59726 0.67163
  -1   6  -7 2152.52  432.74   1-0.23078 0.59044-1.72246-1.52837-1.30062-1.22624
  -1   6  -648913.32 2259.56   1-0.29629 0.46531-0.99730-0.95395 0.29629 0.29350
  -1   6  -648403.46 2337.84   1-0.45906 0.30265 1.63792 1.68020 0.45906 0.45507
  -1   6  -653429.56 2572.84   1-0.40296 0.35802 1.63078 1.67461 1.28638 1.28347
  -1   6  -654131.84 2376.00   1-0.41423 0.34671-0.84250-0.79996-1.27920-1.28279
  -1   6  -649096.85 2608.08   1-0.46393 0.29694 0.74080 0.78528-0.46393-0.46651
  -1   6  -649010.01 2460.44   1-0.29640 0.46435-1.57112-1.52713-0.29640-0.29951
  -1   6  -639345.27 2639.47   1-0.44378 0.31695 1.81048 1.85430 0.86863 0.86519
  -1   6  -650641.57 2212.29   1-0.36635 0.39422-1.59622-1.55339-1.31603-1.31941
  -1   6  -5104872.7 4019.55   1-0.37132 0.32962-0.88850-0.99665 0.37132 0.29052
  -1   6  -595118.74 3846.87   1-0.26456 0.43633 1.55295 1.44380 0.26456 0.18268
  -1   6  -5112753.9 3899.78   1-0.18787 0.51246 1.51736 1.40974 1.38164 1.30086
  -1   6  -595935.62 3529.50   1-0.47762 0.22265-0.73835-0.84713-1.23423-1.31561
  -1   6  -5104952.5 3937.54   1-0.33694 0.36330 0.93948 0.83251-0.33694-0.41753
  -1   6  -595043.46 4216.31   1-0.46279 0.23733-1.63890-1.74630-0.46279-0.54384
  -1   6  -596573.67 4023.29   1-0.19078 0.50932 1.88360 1.77603 1.10046 1.01923
  -1   6  -5106375.8 3575.87   1-0.51326 0.18665-1.41031-1.51879-1.30043-1.38161
   1  -6   4 8463.01 1202.72   1 0.08566-0.55463-1.42316-1.16350-0.08566 0.07313
  -1   6  -4 7831.68 1110.35   1-0.45357 0.18671-0.75812-1.01778 0.45357 0.29478
  -1   6  -4 7695.42  934.85   1-0.00008 0.63962 1.36234 1.10325 1.40697 1.24831
  -1   6  -4 8601.22 1168.39   1-0.54693 0.09266-0.61500-0.87513-1.17527-1.33447
  -1   6  -4 8811.11 1145.41   1-0.14661 0.49301 1.18859 0.93015-0.14661-0.30521
  -1   6  -4 7410.02 1155.94   1-0.69431-0.05481-1.63571-1.89448-0.69431-0.85329
  -1   6  -4 9072.17  897.64   1 0.07199 0.71147 1.82275 1.56379 1.25127 1.09223
  -1   6  -4 8970.32  952.50   1-0.65282-0.01356-1.17328-1.43305-1.24586-1.40483
   1  -6   374332.37 3813.88   1-0.06489-0.64453-1.27953-0.86835 0.06489 0.30169
  -1   6  -374750.19 3476.45   1-0.53804 0.04159-0.61058-1.02176 0.53804 0.30124
  -1   6  -377132.37 3575.57   1 0.14995 0.72903 1.20333 0.79276 1.39089 1.15437
  -1   6  -377203.37 3535.47   1-0.61767-0.03875-0.47733-0.88879-1.10294-1.33993
  -1   6  -364492.08 3542.92   1 0.14511 0.72410 1.47133 1.06147 0.14511-0.09149
  -1   6  -377796.75 3584.76   1-0.92013-0.34125-1.40246-1.81263-0.92013-1.15705
  -1   6  -377165.82 3713.41   1-0.76973-0.19114-0.90884-1.31991-1.15682-1.39358
   1  -6   374400.26 3967.31   1-0.30215-0.88075-1.66095-1.24988-1.31199-1.07524
  -1   6  -2   61.32  110.50   1-0.62038-0.10140-0.45098-1.01366 0.62038 0.30558
  -1   6  -2   79.31  117.21   1-0.68632-0.16806-0.32999-0.89280-1.01856-1.33336
   1  -6   2   99.43  126.55   1-0.26259-0.78084-1.06288-0.50009-1.35707-1.04227
  -1   6  -2  291.73  179.44   1-0.99377-0.47552-0.89894-1.46047-0.99377-1.30862
   1  -6   2   46.74  104.48   1-0.51163-1.02988-1.64908-1.08753-0.51163-0.19678
  -1   6  -2   62.70   99.34   1-0.85810-0.34016-0.64222-1.20457-1.04561-1.36015
   1  -6   2  587.92  280.16   1-0.47636-0.99430-1.46238-0.90004-1.30789-0.99335
   1  -6   1 3374.99  548.43   1-0.26991-0.72824-1.03344-0.31925 0.26991 0.66271
  -1   6  -1 2676.37  613.99   1-0.69736-0.23903-0.28422-0.99842 0.69736 0.30455
  -1   6  -1 3084.92  509.39   1-0.75035-0.29277-0.17707-0.89121-0.92385-1.31645
   1  -6   1 2706.42  535.86   1-0.34196-0.79954-0.95229-0.23818-1.32123-0.92865
  -1   6  -1 2497.08  543.32   1-0.92334-0.46560-0.39315-1.10590-0.92334-1.31597
   1  -6   1 2726.18  561.94   1-0.79550-1.25312-1.57807-0.86514-0.79550-0.40272
  -1   6  -1 2860.27  594.64   1-0.91978-0.46250-0.38968-1.10332-0.92429-1.31661
   1  -6   1 3009.85  640.69   1-0.59703-1.05430-1.27642-0.56277-1.27320-0.88086
   1  -6   019881.55 1398.69   1-0.33055-0.72822-0.94875-0.08304 0.33055 0.80136
  -1   6   018274.00 1767.28   1-0.76686-0.36919-0.11449-0.98021 0.76686 0.29605
  -1   6   020904.51 1529.84   1-0.80816-0.41126-0.02177-0.88724-0.82054-1.29094
   1  -6   022074.41 1393.30   1-0.39492-0.79182-0.87275-0.00728-1.29137-0.82097
  -1   6   020717.28 1392.95   1-0.81919-0.42208-0.02983-0.89401-0.81919-1.28983
   1  -6   019327.39 1483.29   1-0.93080-1.32780-1.37616-0.51186-0.93080-0.46009
  -1   6   021838.98 1646.50   1-0.95974-0.56313-0.15782-1.02275-0.80080-1.27091
   1  -6   021562.86 1519.68   1-0.67627-1.07289-1.12602-0.26108-1.23180-0.76169
   1  -6  -1 6127.47  918.74   1-0.36949-0.70651-0.89125 0.12596 0.36949 0.91830
  -1   6   1 5912.95  720.40   1-0.72383-0.38734 0.22205-0.79357-0.72383-1.27248
   1  -6  -1 5333.27  858.69   1-0.97879-1.31516-1.18858-0.17289-0.97879-0.43013
  -1   6   1 5806.51  818.03   1-0.98300-0.64704 0.05276-0.96346-0.67917-1.22706
   1  -6  -214959.99 1286.77   1-0.39084-0.66720-0.85864 0.31009 0.39084 1.01766
  -1   6   214604.26 1501.18   1-0.90181-0.62625 0.28696-0.88116-0.59415-1.22014
  -1   6   214304.99 1230.77   1-0.64061-0.36476 0.40898-0.75809-0.64061-1.26727
   1  -6  -214197.43 1361.59   1-0.99242-1.26815-1.05532 0.11175-0.99242-0.36583
  -1   6   214844.62 1192.58   1-0.99349-0.71819 0.24405-0.92348-0.56096-1.18665
   1  -6  -314848.52 1499.54   1-0.39775-0.61346-0.84793 0.47232 0.39775 1.10257
  -1   6   314221.31 1384.86   1-0.93689-0.72201 0.43751-0.88196-0.47331-1.17710
  -1   6   315233.83 1325.95   1-0.56608-0.35085 0.55813-0.76037-0.56608-1.27075
   1  -6  -314299.71 1376.98   1-0.99485-1.20997-0.97167 0.34677-0.99485-0.29033
  -1   6   314857.84 1566.42   1-0.99402-0.77938 0.41868-0.90013-0.44647-1.14994
   1  -6  -4 9807.16 1170.63   1-0.39247-0.54752-0.85613 0.61564 0.39247 1.17530
  -1   6   4 8953.78 1101.79   1-0.96389-0.80969 0.58429-0.88650-0.34837-1.12996
  -1   6   4 9100.07 1007.13   1-0.49702-0.34242 0.68409-0.78586-0.49702-1.27970
  -1   6   4 8764.98  929.37   1-0.98649-0.83251 0.57927-0.89082-0.33537-1.11662
   1  -6  -518341.43 1670.72   1-0.37649-0.47089-0.88065 0.74261 0.37649 1.23731
  -1   6   516884.55 1556.46   1-0.98266-0.88913 0.72678-0.89534-0.21974-1.07913
  -1   6   517376.35 1528.01   1-0.43118-0.33721 0.79483-0.82655-0.43118-1.29187
   1  -7  10 1429.89  615.98   1 0.16481-0.89968 1.48621 0.98903 0.16481-0.04576
  -1   7  -9 2211.40  526.43   1-0.19753 0.80613-1.50970-1.16432-0.19753-0.06568
  -1   7  -815054.99 1599.73   1-0.68266 0.26174 1.63954 1.83123 0.68266 0.73542
  -1   7  -816952.51 1676.81   1-0.25664 0.68644-1.54817-1.35448-0.25664-0.20278
  -1   7  -814889.98 1469.37   1-0.35554 0.58736-1.60776-1.41558-1.31578-1.26242
  -1   7  -7 3380.25  713.22   1-0.33443 0.54906-0.94314-0.90158 0.33443 0.31070
  -1   7  -7 3502.14  649.08   1-0.52155 0.36203 1.65054 1.69082 0.52155 0.49642
  -1   7  -7 3357.87  572.70   1-0.51735 0.36533-0.66893-0.62835-1.20176-1.22643
  -1   7  -7 3063.17  658.03   1-0.55001 0.33260 0.58842 0.63129-0.55001-0.57347
  -1   7  -7 2908.49  665.98   1-0.35143 0.53103-1.59876-1.55643-0.35143-0.37550
  -1   7  -7 3021.73  631.58   1-0.46339 0.41886-1.47978-1.43889-1.30991-1.33434
  -1   7  -6106991.7 4281.48   1-0.38860 0.43423-0.86210-0.97206 0.38860 0.28687
  -1   7  -6120942.1 4395.84   1-0.35450 0.46826 1.60017 1.48903 0.35450 0.25149
  -1   7  -6112012.0 3693.31   1-0.24527 0.57681 1.55472 1.44534 1.36354 1.26180
  -1   7  -6118963.6 3666.68   1-0.55489 0.26712-0.60014-0.71090-1.16779-1.27025
  -1   7  -6109646.2 4272.73   1-0.45736 0.36462 0.75182 0.64325-0.45736-0.55883
  -1   7  -6111868.6 3795.23   1-0.49471 0.32711-1.64611-1.75516-0.49471-0.59672
  -1   7  -6117005.7 4129.41   1-0.27695 0.54483 1.87438 1.76509 1.03182 0.92956
  -1   7  -6108463.1 4156.61   1-0.57764 0.24394-1.30947-1.41988-1.28086-1.38308
  -1   7  -512200.09 1268.79   1-0.45167 0.31050-0.76128-1.02274 0.45167 0.27193
  -1   7  -512404.55 1117.69   1-0.19581 0.56605 1.50849 1.24575 0.19581 0.01476
  -1   7  -512693.68 1329.38   1-0.06810 0.69334 1.42417 1.16336 1.40366 1.22406
  -1   7  -511484.73 1176.55   1-0.60079 0.16055-0.51139-0.77349-1.12145-1.30172
  -1   7  -510991.31 1296.37   1-0.32677 0.43458 0.95420 0.69419-0.32677-0.50625
  -1   7  -512455.95 1284.18   1-0.69043 0.07077-1.63704-1.89748-0.69043-0.87037
  -1   7  -512183.27 1287.93   1-0.03634 0.72481 1.86362 1.60295 1.19948 1.01943
  -1   7  -510364.39 1320.70   1-0.68672 0.07420-1.10414-1.36580-1.22500-1.40499
   1  -7   413740.08 1475.30   1 0.05607-0.64545-1.39737-0.98440-0.05607 0.20167
  -1   7  -412423.07 1336.68   1-0.52008 0.18143-0.64321-1.05618 0.52008 0.26234
  -1   7  -412507.84 1070.56   1 0.07792 0.77874 1.28358 0.87126 1.40265 1.14516
  -1   7  -412932.00 1173.44   1-0.65139 0.04928-0.40685-0.82028-1.06345-1.32151
  -1   7  -412680.96 1371.69   1-0.12723 0.57349 1.21099 0.79953-0.12723-0.38472
  -1   7  -4 8500.72  984.71   1-0.89608-0.19550-1.45203-1.86386-0.89608-1.15395
  -1   7  -414099.29 1414.02   1-0.78118-0.08091-0.87840-1.29136-1.14511-1.40288
   1  -7   412957.95 1370.71   1-0.18583-0.88625-1.75585-1.34261-1.28994-1.03206
   1  -7   3 4316.45  805.47   1-0.05999-0.70086-1.28470-0.72020 0.05999 0.39574
  -1   7  -3 3606.48  726.80   1-0.59043 0.05043-0.51105-1.07554 0.59043 0.25468
  -1   7  -3 3941.10  659.55   1-0.70366-0.06366-0.29024-0.85499-0.99462-1.33048
   1  -7   3 3853.93  699.07   1-0.19203-0.83206-1.15303-0.58833-1.38050-1.04468
  -1   7  -3 2221.39  813.31   1-0.99444-0.35449-1.00237-1.56559-0.99444-1.33026
  -1   7  -3 4287.91  654.90   1-0.85650-0.21688-0.64783-1.21212-1.04814-1.38373
   1  -7   3 4028.08  745.97   1-0.36571-1.00532-1.59689-1.03262-1.31602-0.98044
  -1   7  -265223.18 3403.29   1-0.65971-0.07949-0.36819-1.08418 0.65971 0.24596
  -1   7  -267776.89 3373.71   1-0.75517-0.17584-0.16482-0.88093-0.91596-1.32963
   1  -7   273788.07 3632.82   1-0.27632-0.85564-1.04446-0.32838-1.35160-0.93794
  -1   7  -263422.87 3254.56   1-0.94002-0.36054-0.46963-1.18397-0.94002-1.35353
   1  -7   265090.58 3698.41   1-0.52109-1.10040-1.65047-0.93588-0.52109-0.10734
  -1   7  -275991.80 3694.39   1-0.91258-0.33362-0.42383-1.13938-0.94152-1.35488
   1  -7   274466.00 4045.39   1-0.49968-1.07863-1.42993-0.71437-1.30348-0.89011
   1  -7   136317.43 2152.96   1-0.21958-0.73914-1.09944-0.23194 0.21958 0.71133
  -1   7  -131617.69 1847.74   1-0.80407-0.28542-0.03343-0.90086-0.82854-1.32001
  -1   7  -128595.97 1911.45   1-0.83055-0.31170-0.06360-0.92938-0.83055-1.32207
   1  -7   130425.77 2099.30   1-0.77539-1.29409-1.59359-0.72762-0.77539-0.28371
  -1   7  -134041.00 1866.44   1-0.95172-0.43342-0.21232-1.07916-0.83082-1.32196
   1  -7   134246.28 2149.94   1-0.59386-1.11215-1.28191-0.41507-1.27451-0.78336
   1  -7   0 1804.50  434.43   1-0.26764-0.72655-1.03650-0.01746 0.26764 0.83740
  -1   7   0 1843.38  510.96   1-0.84900-0.39102 0.10160-0.91717-0.73345-1.30272
  -1   7   0 1859.41  428.09   1-0.72835-0.27013 0.21115-0.80607-0.72835-1.29788
   1  -7   0 1754.35  511.50   1-0.90489-1.36295-1.43520-0.41784-0.90489-0.33527
  -1   7   0 2006.11  461.56   1-0.97683-0.51919-0.01526-1.03342-0.71943-1.28837
   1  -7  -1 7801.77 1081.17   1-0.29844-0.69669-0.99431 0.17622 0.29844 0.94620
  -1   7   1 7179.32  863.14   1-0.64123-0.24364 0.40767-0.76098-0.64123-1.28876
   1  -7  -1 6691.82 1062.65   1-0.96006-1.35749-1.28229-0.11356-0.96006-0.31251
  -1   7   1 7419.64 1024.69   1-0.99052-0.59354 0.16755-1.00187-0.60912-1.25583
   1  -7  -227964.27 1880.69   1-0.31455-0.65214-0.97165 0.35039 0.31455 1.04032
  -1   7   225136.27 1693.42   1-0.92331-0.58668 0.37549-0.94594-0.52395-1.24882
   1  -7  -223808.87 2016.27   1-0.98178-1.31859-1.16809 0.15203-0.98178-0.25629
  -1   7   227484.85 1738.34   1-0.99487-0.65855 0.33733-0.98338-0.50060-1.22510
   1  -7  -3  910.79  372.08   1-0.31804-0.59497-0.96670 0.50685 0.31804 1.12180
  -1   7   3 1031.74  427.26   1-0.95147-0.67552 0.51175-0.96101-0.41103-1.21370
  -1   7   3 1057.03  306.36   1-0.99140-0.71574 0.49558-0.97645-0.39399-1.19629
  -1   8  -8 1761.91  468.04   1-0.57972 0.42574 1.65452 1.69285 0.57972 0.53347
  -1   8  -7 2433.41  567.99   1-0.43349 0.51115 1.63052 1.51743 0.43349 0.30935
  -1   8  -7 2437.17  546.83   1-0.62768 0.31608-0.45677-0.56950-1.09159-1.21513
  -1   8  -7 2031.44  507.64   1-0.53916 0.40437-1.65258-1.76331-0.53916-0.66213
  -1   8  -7 2117.51  473.38   1-0.64334 0.29993-1.19170-1.30401-1.25109-1.37434
  -1   8  -6    4.65   93.87   1-0.29159 0.59223 1.56847 1.30395 0.29159 0.08956
  -1   8  -6   12.04   80.28   1-0.13960 0.74358 1.48225 1.21967 1.39304 1.19247
  -1   8  -6    0.31   89.61   1-0.65521 0.22788-0.39865-0.66270-1.05875-1.26008
  -1   8  -6   17.99   89.65   1-0.72714 0.15546-1.01416-1.27776-1.19517-1.39620
   1  -8   519655.15 1607.73   1 0.16231-0.66109-1.48436-1.06960-0.16231 0.11636
  -1   8  -520636.97 1587.37   1 0.00335 0.82591 1.35905 0.94501 1.40696 1.12853
  -1   8  -521074.72 1401.05   1-0.68956 0.13286-0.32265-0.73805-1.01418-1.29332
  -1   8  -518458.33 1531.58   1 0.06926 0.89147 1.82404 1.41024 1.25014 0.97125
  -1   8  -519525.34 1551.65   1-0.80172 0.02022-0.82108-1.23597-1.12232-1.40114
   1  -8   421478.79 1860.93   1 0.05048-0.71227-1.39236-0.82609-0.05048 0.30620
  -1   8  -420057.70 1723.89   1-0.72796 0.03378-0.23251-0.79925-0.95900-1.31595
  -1   8  -421083.52 1362.04   1-0.86371-0.10242-0.62226-1.18842-1.03656-1.39315
   1  -8   419547.14 1493.64   1-0.25219-1.01348-1.70512-1.13894-1.30476-0.94816
   1  -8   3 6274.82 1151.64   1-0.04167-0.74378-1.30370-0.58590 0.04167 0.47636
  -1   8  -3 6117.76  921.14   1-0.76815-0.06708-0.13126-0.84933-0.89411-1.32886
  -1   8  -3 6434.49  872.38   1-0.91225-0.21162-0.42534-1.14281-0.94228-1.37668
   1  -8   3 6465.30  882.43   1-0.39601-1.09665-1.56310-0.84563-1.31579-0.88139
   1  -8   211009.22 1109.90   1-0.11429-0.75573-1.22566-0.35634 0.11429 0.62698
  -1   8  -212381.05 1021.05   1-0.80825-0.16785-0.02152-0.89092-0.82037-1.33291
   1  -8   210708.22 1723.17   1-0.49238-1.13277-1.64565-0.77802-0.49238 0.02026
  -1   8  -212955.59 1203.25   1-0.94811-0.30814-0.23514-1.10389-0.84321-1.35538
   1  -8   1  348.29  221.31   1-0.16873-0.74952-1.16237-0.14155 0.16873 0.75942
  -1   8  -1  347.23  213.31   1-0.84676-0.26703 0.09447-0.92627-0.73860-1.32895
   1  -8   1  397.46  263.62   1-0.73446-1.31422-1.61852-0.59948-0.73446-0.14387
  -1   8  -1  436.55  212.48   1-0.97274-0.39343-0.05398-1.07403-0.74193-1.33190
   1  -8   0 2739.61  527.05   1-0.20689-0.72702-1.11549 0.05684 0.20689 0.87559
  -1   8   0 2601.42  668.02   1-0.88249-0.36344 0.21482-0.95723-0.64958-1.31772
  -1   8   0 2637.31  531.42   1-0.98769-0.46903 0.11746-1.05387-0.64001-1.30776
   1  -8  -1 5734.98  922.83   1-0.23071-0.69019-1.08517 0.23866 0.23071 0.97741
  -1   8   1 6090.34  801.77   1-0.99431-0.53631 0.27938-1.04325-0.53831-1.28384
   1  -8  -2 1748.03  496.64   1-0.24188-0.64071-1.07067 0.40468 0.24188 1.06658
  -1   8   2 1954.88  546.73   1-0.94204-0.54433 0.46267-1.01209-0.45241-1.27617
  -1   8   2 2096.69  494.77   1-0.99368-0.59634 0.43242-1.04150-0.43719-1.26051
  -1   9  -814431.20 1446.38   1-0.50509 0.56142 1.64799 1.53292 0.50509 0.35982
  -1   9  -712322.01 1240.36   1-0.37705 0.62865 1.60994 1.34344 0.37705 0.15389
  -1   9  -712516.70 1124.66   1-0.70937 0.29547-0.27689-0.54292-0.98648-1.20889
  -1   9  -6 3416.27  686.92   1-0.25743 0.68745 1.54866 1.13075 0.25743-0.04360
  -1   9  -6 3102.67  692.78   1-0.73038 0.21379-0.22664-0.64401-0.95532-1.25555
  -1   9  -6 3492.26  762.56   1-0.82863 0.11499-0.74016-1.15695-1.08863-1.38848
   1  -9   5 1554.34  519.46   1 0.15094-0.73369-1.47579-0.90773-0.15094 0.22667
  -1   9  -5 1930.62  439.11   1-0.75701 0.12648-0.16011-0.72882-0.91291-1.29094
  -1   9  -5 1780.81  415.60   1-0.87775 0.00521-0.57009-1.13817-1.01244-1.39007
   1  -9   4  715.61  367.31   1 0.05992-0.76406-1.40080-0.68121-0.05992 0.39570
  -1   9  -4  754.18  265.94   1-0.78713 0.03569-0.08054-0.80058-0.86047-1.31629
  -1   9  -4  729.22  260.89   1-0.91789-0.09557-0.39883-1.11819-0.92893-1.38434
  -1   9  -3 4877.05  683.83   1-0.81892-0.05677 0.00945-0.86193-0.79892-1.33255
  -1   9  -3 4881.42  787.15   1-0.94893-0.18728-0.23005-1.10072-0.84046-1.37366
   1  -9   210272.28  989.10   1-0.07334-0.77602-1.27055-0.24793 0.07334 0.68498
  -1   9  -2 9835.28 1011.70   1-0.85088-0.14941 0.10765-0.91505-0.72906-1.34048
  -1   9  -2 9962.59 1278.65   1-0.97139-0.27039-0.06602-1.08798-0.74887-1.35986
   1  -9   1 4870.95  750.72   1-0.11704-0.75906-1.22256-0.04843 0.11704 0.80668
  -1   9  -1 5076.39  707.79   1-0.88176-0.24096 0.21220-0.96184-0.65157-1.34080
  -1   9  -1 5024.43  704.71   1-0.98599-0.34566 0.09213-1.08112-0.65544-1.34423
   1  -9   0 9621.01 1128.40   1-0.14710-0.72847-1.18801 0.13764 0.14710 0.91475
  -1   9   010006.30 1121.09   1-0.91049-0.33036 0.32149-1.00388-0.56706-1.33408
  -1   9   010379.40 1276.75   1-0.99349-0.41381 0.24400-1.08054-0.56099-1.32755
  -1  10  -8  364.81  246.56   1-0.45508 0.67249 1.63686 1.36838 0.45508 0.21079
  -1  10  -7 4561.49  792.33   1-0.34431 0.72245 1.59545 1.17557 0.34431 0.02213
  -1  10  -7 4465.24  683.69   1-0.77255 0.29336-0.11968-0.53903-0.88650-1.20780
  -1  10  -611007.31 1232.02   1-0.24325 0.76269 1.53990 0.96861 0.24325-0.15680
  -1  10  -610542.66 1268.18   1-0.78916 0.21608-0.07498-0.64565-0.85673-1.25583
   1 -10   5 2044.96  586.34   1 0.15463-0.79124-1.47860-0.75719-0.15463 0.32194
  -1  10  -5 2382.75  513.03   1-0.81040 0.13417-0.01535-0.73736-0.81612-1.29302
  -1  10  -5 2182.48  491.48   1-0.92825 0.01573-0.34720-1.06849-0.90250-1.37896
   1 -10   4 9096.00 1386.80   1 0.07953-0.80567-1.41792-0.54503-0.07953 0.47503
  -1  10  -4 9789.45 1096.88   1-0.83455 0.04934 0.05637-0.81698-0.76589-1.32060
  -1  10  -4 8986.19 1079.81   1-0.95364-0.07030-0.19980-1.07238-0.82398-1.37821
  -1  10  -339119.51 2049.67   1-0.86016-0.03693 0.13791-0.88677-0.70697-1.33947
  -1  10  -340403.45 2211.29   1-0.97278-0.15011-0.05363-1.07749-0.74173-1.37375
   1 -10   2 7542.05 1224.24   1-0.02932-0.79323-1.31626-0.14031 0.02932 0.73991
  -1  10  -2 8309.27  962.93   1-0.88596-0.12341 0.22736-0.94866-0.64006-1.35037
  -1  10  -2 8535.12  937.87   1-0.98584-0.22382 0.08996-1.08520-0.65676-1.36657
  -1  11  -6  451.42  291.52   1-0.83659 0.22972 0.06264-0.66134-0.76143-1.25941
   2  10  -5 2708.86  635.23   1-0.37376 0.47999 1.60857 0.72346 0.37376-0.47258
   2  10  -5 2654.93  616.39   1-0.98301-0.12980 0.73011-0.15498-0.21665-1.06216
   2  10  -6  670.90  291.84   1-0.43212 0.48244 1.63010 0.89642 0.43212-0.33633
   2  10  -6  721.78  321.38   1-0.98172-0.06785 0.71789-0.01585-0.22799-0.99570
   2  10  -7 3076.50  600.25   1-0.49719 0.47819 1.64658 1.06432 0.49719-0.19338
   2   9  -2  504.40  257.73   1-0.22589 0.38435 1.52879 0.34284 0.22589-0.75509
   2   9  -2  615.99  319.35   1-0.98887-0.37876 0.79602-0.38977-0.15436-1.13440
   2   9  -2  538.97  306.93   1-0.95623-0.34683 0.84010-0.34367-0.14182-1.12121
   2   9  -3   49.12  117.02   1-0.98480-0.31402 0.74826-0.28620-0.19967-1.10191
   2   9  -3  107.82  168.23   1-0.96540-0.29537 0.77952-0.25287-0.18833-1.08993
   2   9  -419911.78 1613.20   1-0.31781 0.41406 1.58246 0.69932 0.31781-0.50740
   2   9  -420750.56 1506.40   1-0.98096-0.24951 0.71088-0.17224-0.23448-1.05892
   2   9  -513839.30 1246.86   1-0.37818 0.41451 1.61041 0.87871 0.37818-0.36914
   2   9  -514205.61 1482.74   1-0.97821-0.18608 0.68702-0.04475-0.25641-1.00303
   2   9  -6  747.30  303.13   1-0.44656 0.40694 1.63446 1.05417 0.44656-0.22287
   2   9  -6  797.95  322.59   1-0.97748-0.12468 0.68097 0.10053-0.26194-0.93077
   2   9  -717340.08 1634.66   1-0.52106 0.39326 1.65047 1.22160 0.52106-0.07049
   2   9  -8   65.19  119.67   1-0.59922 0.37591 1.65401 1.37656 0.59922 0.08555
   2   9  -9 6723.76  821.29   1-0.67814 0.35781 1.64088 1.51485 0.67814 0.24236
  -2  -8   0  101.91  138.29   1 0.14216-0.28708-1.46906-0.13426-0.14216 0.89510
   2   8   0   48.36  125.06   1-0.99337-0.56569 0.87492-0.46023-0.07731-1.11407
   2   8   0   78.44  142.06   1-0.94025-0.51316 0.92872-0.40470-0.07192-1.10808
  -2  -8   1  189.31  168.04   1 0.17011-0.31979-1.49012-0.30683-0.17011 0.78914
   2   8  -1  376.21  229.35   1-0.99001-0.50166 0.81213-0.37169-0.13885-1.09782
   2   8  -1  230.78  238.08   1-0.95367-0.46596 0.85553-0.32650-0.12982-1.08817
   2   8  -214146.33 1304.56   1-0.20979 0.33924 1.51809 0.48538 0.20979-0.67231
   2   8  -214712.74 1293.80   1-0.98554-0.43651 0.75615-0.27634-0.19225-1.07342
   2   8  -214721.00 1529.28   1-0.96442-0.41607 0.78648-0.24415-0.18304-1.06359
   2   8  -3 7834.90 1093.19   1-0.98078-0.37108 0.70927-0.17188-0.23597-1.03933
   2   8  -3 7389.90 1120.83   1-0.97282-0.36370 0.72243-0.15781-0.23127-1.03403
   2   8  -4  620.98  273.23   1-0.32357 0.34724 1.58536 0.85564 0.32357-0.40262
   2   8  -4  650.75  293.76   1-0.97668-0.30630 0.67451-0.05529-0.26782-0.99337
   2   8  -4  590.11  287.29   1-0.97857-0.30880 0.67050-0.05847-0.26961-0.99459
  -2  -8   4  541.15  294.36   1-0.63238-1.30216-1.21253-0.48356-1.25683-0.53185
   2   8  -521158.49 1716.12   1-0.39554 0.33608 1.61731 1.03900 0.39554-0.25276
   2   8  -521099.25 1744.35   1-0.97431-0.24326 0.65602 0.07752-0.28458-0.93234
  -2  -8   517024.91 1871.16   1-0.48978-1.22020-1.44390-0.86623-1.30548-0.65828
   2   8  -6 2901.13  632.70   1-0.47504 0.31740 1.64192 1.21503 0.47504-0.09538
   2   8  -6 2932.40  644.60   1-0.97479-0.18307 0.65972 0.23257-0.28123-0.85119
  -2  -8   6 2905.79  658.40   1-0.38548-1.17720-0.88728-0.46014-1.29706-0.72710
  -2  -8   6 2327.99  643.28   1-0.25126-1.04235-1.70590-1.27951-1.30460-0.73519
   2   8  -726162.16 1955.40   1-0.55925 0.29401 1.65405 1.37856 0.55925 0.06671
  -2  -8   723567.59 2534.52   1-0.25384-1.10625-1.07446-0.79866-1.36039-0.86824
   2   8  -8 2033.11  470.05   1-0.64477 0.26931 1.64875 1.52470 0.64477 0.23012
   2   8  -9 8419.85  971.02   1-0.72790 0.24699 1.62178 1.64914 0.72790 0.39113
   2   8 -1014759.20 1387.92   1-0.80495 0.23076 1.56992 1.74871 0.80495 0.54607
   2   7   218797.38 1581.17   1-0.91386-0.66909 1.04644-0.43661 0.02468-1.06823
  -2  -7  -1 4638.37  857.39   1 0.08980-0.21755-1.42668-0.09369-0.08980 0.92651
   2   7   1 4524.12  794.78   1-0.99451-0.68858 0.91411-0.41906-0.03796-1.05364
   2   7   1 4894.07  870.91   1-0.93204-0.62664 0.96841-0.36329-0.03986-1.05499
  -2  -7   0   47.85  112.35   1 0.11457-0.25345-1.44720-0.26573-0.11457 0.82374
   2   7   0   49.73  108.46   1-0.99203-0.62542 0.84555-0.33630-0.10633-1.04421
   2   7   0   64.76  125.09   1-0.94733-0.58129 0.89159-0.28870-0.10149-1.03881
  -2  -7   1   23.56  105.40   1 0.15261-0.27605-1.47706-0.44711-0.15261 0.70769
   2   7  -1   50.38  120.49   1-0.98782-0.56054 0.78254-0.24798-0.16725-1.02733
  -2  -7   1    7.49   82.75   1-0.56634-0.99336-1.65432-0.62637-0.56634 0.29338
   2   7  -1   27.52  111.29   1-0.95984-0.53317 0.81733-0.21157-0.15942-1.01894
   2   7  -210381.28 1017.35   1-0.20395 0.28404 1.51412 0.63480 0.20395-0.57912
   2   7  -210680.04 1308.83   1-0.98272-0.49476 0.72730-0.15187-0.21926-1.00154
   2   7  -210657.07 1077.01   1-0.96970-0.48240 0.74757-0.12995-0.21247-0.99419
  -2  -7   210908.49 1213.47   1-0.81308-1.30051-0.78780 0.09054-1.10869-0.32695
   2   7  -319202.35 1494.78   1-0.97770-0.42907 0.68276-0.04509-0.26031-0.96479
   2   7  -318983.66 1597.30   1-0.97721-0.42911 0.68360-0.04344-0.26000-0.96394
  -2  -7   319241.62 1671.88   1-0.75662-1.30472-0.94255-0.21549-1.16947-0.46553
   2   7  -422109.48 1717.11   1-0.34422 0.26553 1.59542 1.01908 0.34422-0.28295
   2   7  -422836.46 1849.80   1-0.97390-0.36459 0.65292 0.07642-0.28737-0.91405
  -2  -7   424307.50 2303.71   1-0.57905-1.18834-0.55410 0.02240-1.14409-0.51742
   2   7  -418846.04 2089.14   1-0.98203-0.37327 0.63443 0.05866-0.29585-0.92201
  -2  -7   423358.42 1845.15   1-0.65496-1.26372-1.16908-0.59331-1.24465-0.61849
   2   7  -5 7881.48  961.87   1-0.42945 0.24112 1.62925 1.20432 0.42945-0.11984
   2   7  -5 8025.42  863.72   1-0.97265-0.30267 0.64365 0.21848-0.29571-0.84459
  -2  -7   5 8103.38 1337.17   1-0.50687-1.17685-0.68756-0.26239-1.21066-0.66178
   2   7  -5 6663.82 1152.87   1-0.98409-0.31468 0.61036 0.18590-0.31318-0.86155
  -2  -7   5 6753.38  957.82   1-0.46808-1.13750-1.47355-1.04909-1.30922-0.76085
   2   7  -6 1877.65  490.63   1-0.52066 0.21072 1.65040 1.37691 0.52066 0.04926
   2   7  -6 1620.04  476.29   1-0.97535-0.24470 0.66401 0.39017-0.27735-0.74843
  -2  -7   6 1764.10  505.72   1-0.39373-1.12437-0.87458-0.60075-1.29209-0.82102
   2   7  -771190.60 3210.67   1-0.61377 0.17843 1.65298 1.53089 0.61377 0.22025
   2   7  -775688.17 3669.61   1-0.98295-0.19162 0.72957 0.60708-0.21714-0.61042
  -2  -7   770314.43 3901.29   1-0.21682-1.00818-1.12220-0.99978-1.37314-0.97994
   2   7  -8 3958.03  707.21   1-0.70431 0.14870 1.63202 1.66136 0.70431 0.38868
  -2  -7   8 2952.97  723.05   1-0.03765-0.88942 1.30780 1.27555-0.03765 0.27593
   2   7  -9 4635.62  822.96   1-0.78794 0.12590 1.58419 1.76495 0.78794 0.55019
  -2  -7   9 3879.42  865.42   1-0.09792-1.01032 1.24389 1.06018-0.09792 0.13764
   2   7 -10 1872.35  515.53   1-0.86085 0.11380 1.50783 1.84000 0.86085 0.70099
  -2  -7  10 1711.56  486.50   1-0.11851-1.09154 1.22090 0.88576-0.11851 0.03904
   2   7 -1116621.12 1317.26   1-0.92001 0.11545 1.40272 1.88632 0.92001 0.83804
  -2  -7  1118317.43 1717.17   1-0.11780-1.15146 1.22171 0.73513-0.11780-0.03825
  -2  -6  -313125.02 1414.75   1 0.03275-0.09207-1.37620 0.10649-0.03275 1.04062
   2   6   312972.07 1357.31   1-0.99237-0.86886 1.04538-0.43715 0.09973-0.97267
   2   6   314096.65 1434.86   1-0.89886-0.77577 1.10304-0.37828 0.07280-0.99908
  -2  -6  -2 7117.03 1111.50   1 0.03908-0.14639-1.38201-0.05083-0.03908 0.95630
   2   6   2 7590.14 1008.56   1-0.91917-0.73545 1.02487-0.30507 0.00663-0.98745
  -2  -6  -116221.33 1600.07   1 0.05966-0.18646-1.40057-0.22089-0.05966 0.85770
   2   6   115133.58 1403.29   1-0.99412-0.74926 0.89739-0.28250-0.05485-0.97166
  -2  -6  -113518.20 1665.02   1-0.94238-1.18739-0.48127 0.69642-0.94238-0.02560
   2   6   117032.50 1612.37   1-0.93651-0.69215 0.94719-0.23136-0.05705-0.97334
  -2  -6   047443.82 2570.84   1 0.09519-0.21159-1.43121-0.40306-0.09519 0.74417
   2   6   050700.62 2594.07   1-0.99110-0.68557 0.82908-0.19947-0.12242-0.96143
  -2  -6   037220.82 3130.42   1-0.95667-1.26232-0.55708 0.46917-0.95667-0.11789
  -2  -6   043181.78 2534.20   1-0.21721-0.52258-1.52308-0.49683-0.21721 0.62150
   2   6   047321.19 3027.77   1-0.95100-0.64601 0.87108-0.15609-0.11765-0.95614
  -2  -6   112714.44 1201.81   1 0.14613-0.22131-1.47212-0.59547-0.14613 0.61523
   2   6  -112896.15 1130.73   1-0.98653-0.62032 0.76720-0.11002-0.18182-0.94303
  -2  -6   111020.00 1278.42   1-0.47673-0.84268-1.64230-0.76740-0.47673 0.28407
   2   6  -112763.95 1110.53   1-0.96274-0.59712 0.79810-0.07769-0.17417-0.93487
  -2  -6   113827.90 1452.15   1-0.88700-1.25276-0.53385 0.34259-0.99532-0.23462
   2   6  -2 1519.00  411.42   1-0.98136-0.55448 0.71456-0.01131-0.23108-0.91448
  -2  -6   2 1434.36  424.91   1-0.70722-1.13410-0.28192 0.44395-0.98955-0.30615
   2   6  -2 1459.09  383.22   1-0.97199-0.54557 0.72928 0.00415-0.22616-0.90907
  -2  -6   2 1633.78  441.91   1-0.85562-1.28204-0.65091 0.07425-1.04953-0.36661
   2   6  -3  420.68  236.94   1-0.29273 0.19515 1.56910 0.99475 0.29273-0.31331
   2   6  -3  467.80  228.15   1-0.97676-0.48921 0.67515 0.10061-0.26724-0.87284
  -2  -6   3  473.94  255.72   1-0.67727-1.16482-0.35031 0.22422-1.03061-0.42501
   2   6  -3  467.21  242.70   1-0.97842-0.49134 0.67199 0.09813-0.26852-0.87365
  -2  -6   3  455.17  237.45   1-0.79338-1.28047-0.84478-0.27093-1.13186-0.52673
   2   6  -4  305.53  176.02   1-0.15382 0.39558-1.18012-1.60223 0.15382-0.37353
   2   6  -4  254.30  181.37   1-0.38473 0.16396 1.61308 1.19013 0.38473-0.14342
   2   6  -4  304.93  177.00   1-0.97415-0.42592 0.65479 0.23159-0.28569-0.81349
  -2  -6   4  226.13  178.84   1-0.62382-1.17205-0.46474-0.04154-1.09601-0.56821
   2   6  -4  243.70  198.98   1-0.98200-0.43427 0.63470 0.21213-0.29565-0.82299
  -2  -6   4  243.35  195.53   1-0.66578-1.21352-1.14747-0.72489-1.23829-0.71095
   2   6  -5  225.18  185.79   1-0.05685 0.55321-1.28799-1.55860 0.05685-0.39250
   2   6  -5  230.20  155.83   1-0.48433 0.12518 1.64398 1.37247 0.48433 0.03405
   2   6  -5  206.86  194.07   1-0.97517-0.36627 0.66262 0.39076-0.27861-0.72861
  -2  -6   5  254.27  212.38   1-0.53309-1.14199-0.64048-0.36862-1.18792-0.73793
   2   6  -5  226.36  174.87   1-0.98136-0.37297 0.64172 0.37044-0.29057-0.74013
  -2  -6   5  177.54  159.30   1-0.39097-0.99936-1.56887-1.29760-1.31592-0.86636
   2   6  -622779.37 1559.25   1-0.58641 0.08392 1.65447 1.53436 0.58641 0.21402
   2   6  -623099.58 1524.30   1-0.98136-0.31178 0.71450 0.59397-0.23114-0.60334
  -2  -6   622670.41 1896.34   1-0.37992-1.04951-0.89577-0.77522-1.30034-0.92813
  -2  -6   618470.63 1704.52   1-0.09651-0.76593 1.24543 1.36302-0.09651 0.27419
   2   6  -774308.90 2688.21   1-0.68539 0.04575 1.63867 1.66999 0.68539 0.39088
   2   6  -767340.47 3351.93   1-0.99187-0.26162 0.84267 0.87347-0.10914-0.40354
  -2  -6   758628.30 3450.65   1-0.21020-0.94024 1.11133 1.07748-0.21020 0.08249
   2   6  -815496.89 1279.14   1-0.77603 0.01593 1.59313 1.77586 0.77603 0.55941
  -2  -6   815098.53 1597.65   1-0.24422-1.03489 1.06760 0.88231-0.24422-0.02953
   2   6  -9 4770.75  738.63   1-0.85407-0.00129 1.51684 1.85098 0.85407 0.71534
  -2  -6   9 4587.74  826.15   1-0.24709-1.09840 1.06382 0.72710-0.24709-0.11042
   2   6 -10 3366.14  577.01   1-0.91648-0.00288 1.41075 1.89632 0.91648 0.85564
  -2  -6  10 3508.55  797.08   1-0.23382-1.14576 1.08116 0.59298-0.23382-0.17516
  -2  -6  11  265.50  217.40   1-0.21067-1.18323 1.11073 0.47113-0.21067-0.23001
   2   5   4  345.86  236.09   1-0.98658-0.98482 1.11881-0.36176 0.18128-0.87004
   2   5   4  433.61  258.31   1-0.87816-0.87676 1.17254-0.30706 0.13354-0.91731
  -2  -5  -317476.47 1768.99   1-0.00926-0.07286-1.33620-0.00680 0.00926 0.98371
   2   5   315158.72 1622.17   1-0.99251-0.93008 1.04270-0.28653 0.09682-0.87670
   2   5   315930.93 1600.69   1-0.90068-0.83864 1.09650-0.23171 0.06718-0.90587
  -2  -5  -288644.60 5001.58   1 0.00586-0.11838-1.35086-0.17300-0.00586 0.89057
   2   5   287557.67 5284.70   1 0.00885 0.13213 1.35373 0.17765 0.00885-0.88704
  -2  -5  -280941.78 5226.07   1-0.87570-0.99898-0.20946 0.96663-0.87570 0.02020
   2   5   290672.42 3288.51   1-0.92016-0.79749 1.02071-0.15611 0.00317-0.89208
  -2  -5  -137961.44 2418.01   1 0.03780-0.14709-1.38084-0.35449-0.03780 0.78062
   2   5   133081.35 2015.02   1-0.64261-0.45770-0.40476-1.43113 0.64261-0.17582
   2   5   139175.31 1871.86   1-0.99411-0.81032 0.89704-0.12954-0.05520-0.87313
   2   5   135660.09 2468.82   1 0.06179 0.24570 1.40245 0.37780 0.06179-0.75610
  -2  -5  -134962.97 2034.86   1-0.86646-1.05036-0.17787 0.84678-0.86646-0.04857
   2   5   137148.89 2350.74   1-0.93673-0.75342 0.94615-0.07931-0.05790-0.87537
  -2  -5   056932.08 3479.40   1 0.08760-0.15796-1.42481-0.54995-0.08760 0.65282
   2   5   048023.34 2934.94   1-0.52297-0.27741-0.63801-1.51287 0.52297-0.21745
   2   5   051843.19 2542.99   1-0.99121-0.74676 0.83099-0.04425-0.12055-0.86068
  -2  -5   038808.89 2604.06   1-0.86787-1.11241-0.18264 0.69057-0.86787-0.12799
   2   5   054682.03 3045.94   1-0.95044-0.70650 0.87428 0.00021-0.11514-0.85481
  -2  -5   057361.94 3135.07   1-0.93989-1.18396-0.28405 0.59046-0.86941-0.12975
  -2  -5   1  190.58  137.41   1 0.15570-0.15051-1.47939-0.75606-0.15570 0.50672
   2   5  -1  143.68  138.29   1-0.39310-0.08688-0.85514-1.57849 0.39310-0.26932
   2   5  -1  201.60  145.70   1-0.98702-0.68189 0.77290 0.04901-0.17641-0.83873
  -2  -5   1  139.14  137.58   1-0.78216-1.08729-0.09402 0.62989-0.86948-0.20715
  -2  -5   1  110.75  140.73   1-0.89820-1.20336-0.29121 0.43057-0.89820-0.23632
  -2  -5   1  163.86  141.35   1-0.45739-0.76226-1.63748-0.91564-0.45739 0.20452
   2   5  -1  183.94  150.83   1-0.96133-0.65675 0.80758 0.08492-0.16691-0.82878
  -2  -5   1  142.93  145.57   1-0.92731-1.23205-0.35207 0.37117-0.90502-0.24313
   2   5  -271037.35 3424.90   1-0.98265-0.61685 0.72668 0.15412-0.21983-0.80435
  -2  -5   272595.42 3936.21   1-0.76710-1.13291-0.13401 0.43856-0.89591-0.31139
   2   5  -270290.41 3719.38   1-0.96930-0.60409 0.75066 0.17937-0.21015-0.79422
  -2  -5   272158.53 3783.68   1-0.89795-1.26335-0.48869 0.08326-0.97356-0.38946
   2   5  -3    4.89   90.13   1-0.12865 0.29887-1.20936-1.62968 0.12865-0.37776
   2   5  -3   20.69   72.64   1-0.34158 0.08524 1.59417 1.17321 0.34158-0.16545
   2   5  -3    0.52   69.38   1-0.97953-0.55305 0.69827 0.27703-0.24609-0.75282
  -2  -5   3   -0.53   74.98   1-0.73359-1.16007-0.21878 0.20245-0.95038-0.44366
   2   5  -3   21.65   66.43   1-0.97427-0.54821 0.71005 0.28940-0.24047-0.74678
  -2  -5   3  232.62  169.90   1-0.82909-1.25515-0.73869-0.31806-1.08801-0.58171
   2   5  -4 2854.89  492.48   1-0.00847 0.47970-1.33697-1.60578 0.00847-0.41993
   2   5  -4 3332.09  546.50   1-0.45159 0.03604 1.63589 1.36633 0.45159 0.02244
   2   5  -4 3048.14  531.21   1-0.97941-0.49226 0.69720 0.42730-0.24708-0.67600
  -2  -5   4 3041.94  611.21   1-0.66931-1.15646-0.36794-0.09803-1.04095-0.61203
   2   5  -4 2809.41  619.98   1-0.37937 0.10751-1.61090-1.87867-0.37937-0.80760
   2   5  -4 2662.39  585.74   1-0.97383-0.48711 0.71385 0.44449-0.23765-0.66618
  -2  -5   4 2507.58  586.12   1-0.65192-1.13864-1.17504-0.90568-1.24637-0.81785
   2   5  -5  456.07  251.60   1 0.09582 0.64465-1.43174-1.54904-0.09582-0.44623
   2   5  -5  393.41  207.71   1-0.56460-0.01614 1.65427 1.53614 0.56460 0.21334
   2   5  -5  433.59  210.04   1-0.98404-0.43621 0.74037 0.62181-0.20707-0.55819
  -2  -5   5  430.98  230.46   1-0.54876-1.09659-0.61161-0.49304-1.17358-0.82245
  -2  -5   5  344.16  203.51   1-0.34760-0.89528 0.92389 1.03988-0.34760 0.00222
   2   5  -5  448.57  218.32   1-0.98594-0.43856-1.13443-1.25076-0.98594-1.33612
   2   5  -5  342.04  284.20   1 0.13503 0.68213 1.78878 1.67166 1.27471 0.92403
   2   5  -5  231.45  284.97   1-0.95270-0.40559 0.86125 0.74414-0.12534-0.47601
   2   5  -614178.11 1241.76   1-0.67334-0.06407 1.64224 1.67552 0.67334 0.39997
   2   5  -612156.10 1344.81   1-0.99286-0.38435 0.86266 0.89544-0.08947-0.36279
  -2  -5   611931.66 1253.24   1-0.31548-0.92398-0.99033-1.02309-1.33436-1.06103
  -2  -5   613247.75 1473.15   1-0.39435-1.00266 0.85322 0.81778-0.39435-0.12253
   2   5  -610687.52 1206.31   1-0.98549-0.37747-0.76982-0.73475-0.98549-1.25771
   2   5  -7 6407.38  847.56   1-0.77136-0.10127 1.59643 1.78112 0.77136 0.57587
  -2  -5   7 5748.04  841.31   1-0.24619-0.91628 1.54175 1.35704 0.24619 0.44167
   2   5  -7 4396.83 1035.73   1-0.98088-0.31169 1.16552 1.34964 0.23516 0.03964
  -2  -5   7 5991.70  855.24   1-0.39348-1.06242 0.85457 0.66769-0.39348-0.19967
   2   5  -7 6085.64  891.00   1-0.96303-0.29409-0.59481-0.40792-0.96303-1.15683
   2   5  -8 1789.17  422.53   1-0.85391-0.12301 1.51704 1.85318 0.85391 0.73632
  -2  -5   8 1777.10  604.82   1-0.29244-1.02335 1.56894 1.23282 0.29244 0.41004
  -2  -5   8 1829.06  529.70   1-0.37496-1.10453 0.88298 0.54465-0.37496-0.25917
   2   5  -8 1746.94  577.51   1-0.94911-0.21954-0.51564-0.17733-0.94911-1.06491
   2   5  -9 1663.19  381.29   1-0.91823-0.12650 1.40683 1.89437 0.91823 0.87851
  -2  -5   9 1469.06  519.91   1-0.34735-1.13755 0.92425 0.43449-0.34735-0.30957
   2   5 -10 2210.00  554.64   1-0.96313-0.11059 1.26962 1.90857 0.96313 1.00130
  -2  -5  10 2011.31  551.23   1-0.31401-1.16482 0.97242 0.33123-0.31401-0.35423
  -2  -5  11 1550.02  522.45   1-0.27651-1.18796 1.02449 0.23186-0.27651-0.39474
   2   4   5   32.35  134.68   1-0.97461-1.09459 1.20536-0.27324 0.28249-0.74775
   2   4   5   57.49  157.23   1-0.03505-0.15476 1.31046-0.16694-0.03505-1.06610
   2   4   5   83.94  138.40   1-0.85077-0.97104 1.25280-0.22505 0.20624-0.82357
  -2  -4  -416672.61 1436.14   1-0.05414 0.00414-1.29081 0.03680 0.05414 1.00765
   2   4   415742.37 1676.49   1-0.98523-1.04454 1.13119-0.19608 0.19540-0.75705
   2   4   415621.37 1412.30   1-0.04727-0.10635 1.29794-0.02800-0.04727-1.00030
   2   4   417117.09 1343.08   1-0.87543-0.93507 1.18108-0.14541 0.14114-0.81088
  -2  -4  -325458.56 1789.44   1-0.04614-0.04850-1.29911-0.12302 0.04614 0.92163
   2   4   320978.02 1669.16   1-0.81750-0.81513 0.02488-1.15121 0.81750-0.05799
   2   4   323454.96 1814.98   1-0.99164-0.99028 1.05780-0.11812 0.11328-0.76136
   2   4   324226.10 1931.63   1-0.04543-0.04389 1.29984 0.12533-0.04543-0.92046
  -2  -4  -322934.95 1678.83   1-0.81866-0.82021-0.02827 1.14624-0.81866 0.05636
   2   4   324993.62 1595.84   1-0.89697-0.89598 1.10977-0.06533 0.07859-0.79563
  -2  -4  -2 1443.17  414.63   1-0.01922-0.08224-1.32637-0.30178 0.01922 0.81672
   2   4   2  479.78  281.99   1-0.71327-0.65025-0.24718-1.27177 0.71327-0.08422
   2   4   2  557.81  270.47   1-0.02138 0.04079 1.32421 0.30115-0.02138-0.81839
  -2  -4  -2  577.52  324.33   1-0.78871-0.85088 0.05629 1.07934-0.78871 0.00830
   2   4   2  622.72  322.90   1-0.91548-0.85385 1.03997 0.01626 0.01924-0.77718
  -2  -4  -1 2768.38  579.73   1 0.02844-0.09523-1.37220-0.49916-0.02844 0.69104
   2   4   1 2434.13  642.37   1-0.58525-0.46157-0.52119-1.39424 0.58525-0.13423
   2   4   1 2827.90  539.16   1-0.99461-0.87190 0.91993 0.04667-0.03205-0.75110
  -2  -4  -1 2843.12  522.89   1-0.84013-0.96284 0.07362 0.94688-0.75359-0.03454
   2   4   1 2792.19  601.25   1 0.04173 0.16454 1.38445 0.51284 0.04173-0.67726
  -2  -4  -1 2630.62  597.54   1-0.75598-0.87878 0.14253 1.01416-0.75598-0.03697
   2   4   1 2908.22  669.30   1-0.93097-0.80871 0.97336 0.10105-0.03581-0.75444
  -2  -4  -1 2805.34  582.23   1-0.97334-1.09574-0.04852 0.82409-0.73878-0.02014
  -2  -4   0  546.62  275.58   1 0.09828-0.08604-1.43380-0.71227-0.09828 0.54319
   2   4   0  454.39  286.61   1-0.43718-0.25285-0.78508-1.50662 0.43718-0.20429
   2   4   0  446.42  242.90   1-0.99274-0.80936 0.86012 0.13819-0.09198-0.73323
  -2  -4   0  525.21  238.19   1-0.84724-1.03062 0.09599 0.81793-0.73750-0.09625
  -2  -4   0  401.14  194.18   1-0.71891-0.90235 0.23380 0.95398-0.71891-0.07792
   2   4   0  523.34  222.89   1-0.94336-0.76047 0.91276 0.19182-0.08469-0.72552
  -2  -4   0  518.69  254.16   1-0.97184-1.15490-0.06207 0.65926-0.74659-0.10574
   2   4  -145716.44 2366.78   1-0.27666-0.03167-1.02428-1.59434 0.27666-0.28682
   2   4  -144011.93 2618.07   1-0.19012 0.05391 1.50451 0.93403 0.19012-0.37372
   2   4  -147619.35 2293.30   1-0.98996-0.74590 0.81131 0.24071-0.13965-0.70310
  -2  -4   141768.45 2402.60   1-0.67173-0.91579 0.34190 0.91064-0.67173-0.10875
  -2  -4   149972.28 2443.27   1-0.49593-0.73973-1.64633-1.07754-0.49593 0.06707
   2   4  -148313.76 2157.82   1-0.95235-0.70883 0.86328 0.29373-0.12375-0.68679
  -2  -4   151707.69 2611.66   1-0.96411-1.20782-0.12552 0.44450-0.78272-0.21966
   2   4  -218191.15 1363.94   1-0.98759-0.68285 0.77969 0.36042-0.16996-0.65561
  -2  -4   218145.70 1499.64   1-0.83174-1.13647 0.04779 0.46706-0.77198-0.28633
  -2  -4   2 9894.73 1940.38   1-0.98262-1.28706-1.16186-0.74443-0.98262-0.49754
   2   4  -217689.78 1270.91   1-0.95693-0.65277 0.83580 0.41763-0.14516-0.63040
  -2  -4   218861.90 1579.23   1-0.94082-1.24520-0.27872 0.14001-0.86658-0.38130
   2   4  -320729.43 1313.18   1 0.03684 0.40314-1.37997-1.64698-0.03684-0.44431
   2   4  -319257.41 1588.04   1-0.42473-0.05896 1.62771 1.36012 0.42473 0.01671
   2   4  -319312.89 1235.56   1-0.98725-0.62184 0.77559 0.50766-0.17386-0.58171
  -2  -4   319428.02 1435.75   1-0.79630-1.16171-0.05525 0.21267-0.84341-0.43557
  -2  -4   311890.85 1562.28   1-0.73011-1.09544 0.20688 0.47273-0.73011-0.32315
   2   4  -315663.62 1927.73   1-0.37845-0.01340-1.61052-1.87656-0.37845-0.78560
   2   4  -319322.83 1548.55   1-0.95325-0.58846 0.85804 0.59126-0.12786-0.53530
  -2  -4   320187.67 1649.88   1-0.86587-1.23090-0.61445-0.34700-1.03299-0.62550
   2   4  -461283.80 2372.03   1 0.16800 0.59495-1.48857-1.60408-0.16800-0.49747
   2   4  -461559.42 2675.30   1-0.99040-0.56432 0.81791 0.70131-0.13326-0.46330
  -2  -4   449291.25 2690.57   1-0.71822-1.14431-0.25594-0.13934-0.97358-0.64353
  -2  -4   451737.53 2624.29   1-0.64070-1.06666 0.40877 0.52318-0.64070-0.31176
   2   4  -448386.96 3089.94   1-0.96370-0.53801-1.26720-1.38185-0.96370-1.29290
  -2  -4   440970.91 2891.59   1-0.55179-0.97749-1.35157-1.23541-1.28978-0.96007
   2   4  -5 1460.40  324.44   1-0.67160-0.18420 1.64272 1.67799 0.67160 0.41936
  -2  -4   5 1174.18  377.59   1-0.27329-0.76069 1.55807 1.52281 0.27329 0.52553
   2   4  -5 1192.41  379.89   1-0.99487-0.50811 0.94685 0.98159-0.00451-0.25675
  -2  -4   5 1146.59  389.14   1-0.53985-1.02661-0.62810-0.66283-1.18181-0.92956
  -2  -4   5 1281.38  443.43   1-0.58996-1.07653 0.51195 0.47494-0.58996-0.33902
   2   4  -5 1240.18  353.95   1-0.99017-0.50386-0.82804-0.79130-0.99017-1.24144
   2   4  -685217.44 3623.60   1-0.77690-0.22868 1.59251 1.77918 0.77690 0.60254
  -2  -4   679306.56 4212.73   1-0.35238-0.90059 1.59920 1.41251 0.35238 0.52673
   2   4  -653979.52 4236.73   1 0.05759 0.60474 1.30492 1.49228 1.40461 1.23087
  -2  -4   679903.38 3795.94   1-0.54530-1.09250 0.59718 0.40870-0.54530-0.37238
   2   4  -683829.34 3667.80   1-0.96506-0.41785-0.60754-0.41908-0.96506-1.13799
   2   4  -776637.68 2706.64   1-0.86246-0.25343 1.50561 1.84370 0.86246 0.76599
  -2  -4   776870.89 3284.71   1-0.40732-1.01635 1.62169 1.28359 0.40732 0.50379
  -2  -4   781423.67 3216.10   1-0.50188-1.10971 0.67558 0.33565-0.50188-0.40697
   2   4  -775402.75 3487.42   1-0.94709-0.33926-0.50511-0.16519-0.94709-1.04200
   2   4  -823275.42 1582.22   1-0.92636-0.25652 1.38748 1.87700 0.92636 0.90778
  -2  -4   824374.25 1901.39   1-0.44142-1.11126 1.63295 1.14344 0.44142 0.46000
  -2  -4   824761.19 2174.78   1-0.45827-1.12673 0.75030 0.25895-0.45827-0.44136
   2   4  -823478.99 1627.95   1-0.93886-0.27039-0.46401 0.02735-0.93886-0.95576
  -2  -4   812746.40 2131.09   1 0.07044-0.59751 1.82349 1.33332 1.25063 1.26908
   2   4  -9   39.39   94.16   1-0.96876-0.23809 1.24418 1.88512 0.96876 1.02806
  -2  -4   9   46.11  121.02   1-0.41387-1.14295 0.82258 0.17979-0.41387-0.47497
  -2  -4   9   14.08   85.96   1-0.17610-0.90469 1.88367 1.24212 1.11117 1.05183
   2   4 -1027894.63 1851.55   1-0.99080-0.19932 1.08092 1.87329 0.99080 1.12800
  -2  -4  1026404.73 1820.33   1-0.36835-1.15807 0.89298 0.09873-0.36835-0.50747
  -2  -4  11 2881.91  703.83   1-0.32152-1.17186 0.96174 0.01606-0.32152-0.53864
   2   3   6  482.36  274.85   1-0.95309-1.19467 1.30192-0.17503 0.40347-0.60582
   2   3   6  503.68  294.62   1-0.04538-0.28682 1.29988-0.17590-0.04538-1.05554
   2   3   5   19.81   99.30   1-0.96948-1.15043 1.23273-0.09274 0.31583-0.61559
   2   3   5  118.11  143.64   1-0.06407-0.24488 1.28039-0.04395-0.06407-0.99622
   2   3   5   14.73  115.26   1-0.84221-1.02354 1.27567-0.04907 0.22749-0.70349
  -2  -3  -412885.45 1272.68   1-0.09525 0.02426-1.24682-0.07253 0.09525 0.94981
   2   3   411589.67 1294.11   1-0.89674-1.01627 0.28569-0.88858 0.89674 0.04219
   2   3   411640.64 1407.45   1-0.98110-1.10150 1.16390-0.01006 0.23326-0.62031
   2   3   412184.18 1338.79   1-0.07208-0.19227 1.27190 0.09899-0.07208-0.92622
   2   3   410737.23 1186.51   1-0.86550-0.98619 1.21108 0.03773 0.16810-0.68509
  -2  -3  -3   24.50   75.71   1-0.07538-0.01652-1.26837-0.24560 0.07538 0.85193
   2   3   3   31.83  112.28   1-0.80491-0.86377-0.01129-1.03407 0.80491 0.02836
   2   3   3   69.17   99.92   1-0.98871-1.04842 1.09670 0.07408 0.15634-0.61942
   2   3   3   35.56   93.29   1-0.06420-0.12375 1.28026 0.25879-0.06420-0.84033
  -2  -3  -3   55.55  104.67   1-0.73214-0.67259 0.20193 1.22340-0.73214 0.04398
   2   3   3   34.73   96.09   1-0.88551-0.94557 1.14888 0.12690 0.11264-0.66275
  -2  -3  -242713.80 2092.84   1-0.03128-0.03307-1.31427-0.44301 0.03128 0.72983
   2   3   240349.60 2687.32   1-0.67783-0.67604-0.32839-1.19963 0.67783-0.02071
  -2  -3  -242739.20 2435.35   1-0.88608-0.88704 0.22778 1.09907-0.63974 0.05823
   2   3   241301.37 2468.79   1-0.03039-0.02932 1.31516 0.44515-0.03039-0.72851
  -2  -3  -242312.50 2249.40   1-0.67873-0.67980 0.32637 1.19639-0.67873 0.01938
   2   3   243798.00 2136.33   1-0.90216-0.90159 1.09108 0.22052 0.06254-0.63505
  -2  -3  -1 3916.05  785.38   1 0.04006-0.02238-1.38293-0.66318-0.04006 0.58048
   2   3   1 3723.61  639.86   1-0.51527-0.45282-0.65184-1.37158 0.51527-0.10527
   2   3   1 3619.48  616.76   1-0.99470-0.93306 0.97663 0.25667 0.02642-0.59374
  -2  -3  -1 4177.52  636.04   1-0.90092-0.96256 0.28351 1.00348-0.59684 0.02333
   2   3   1 3990.21  738.23   1 0.05036 0.11207 1.39225 0.67368 0.05036-0.56974
  -2  -3  -1 4034.18  641.70   1-0.60792-0.66962 0.47625 1.19483-0.60792 0.01218
   2   3   1 4217.27  633.93   1-0.91515-0.85395 1.04127 0.32208 0.02033-0.59946
  -2  -3  -1 4294.93  693.29   1-0.99215-1.05352 0.20415 0.92355-0.58623 0.03358
  -2  -3   0 2244.61  445.54   1 0.14002 0.01691-1.46739-0.89917-0.14002 0.40252
   2   3   0 2038.15  654.38   1-0.32375-0.20065-0.95853-1.52677 0.32375-0.21878
   2   3   0 1940.69  393.06   1-0.99476-0.87245 0.93090 0.36228-0.02087-0.56324
  -2  -3   0 2259.77  452.40   1-0.91006-1.03237 0.31976 0.88839-0.56843-0.02606
  -2  -3   0 2300.09  511.97   1-0.49843-0.62076 0.68162 1.24877-0.49843 0.04366
  -2  -3   0 2371.88  495.57   1-0.22542-0.34753-1.52849-0.96135-0.22542 0.31661
   2   3   0 2170.58  492.38   1-0.92368-0.80184 1.00579 0.43798-0.00920-0.55120
  -2  -3   0 2273.45  552.67   1-0.99263-1.11468 0.21712 0.78525-0.57805-0.03601
   2   3  -1 3439.36  777.71   1-0.11892 0.06483-1.22044-1.63716 0.11892-0.34561
   2   3  -1 3776.36  587.62   1-0.99426-0.81128 0.90292 0.48563-0.04927-0.51384
  -2  -3   1 3503.49  651.61   1-0.27560-0.45856 1.02574 1.44143-0.27560 0.18848
  -2  -3   1 3848.80  636.94   1-0.58629-0.76902-1.65447-1.23871-0.58629-0.12218
   2   3  -1 3910.53  706.96   1-0.92549-0.74302 0.99792 0.58147-0.01569-0.47990
  -2  -3   1 3986.60  785.00   1-0.99116-1.17386 0.18106 0.59790-0.60070-0.13645
   2   3  -212628.34 1138.37   1-0.40799-0.16410 1.62193 1.35634 0.40799 0.02111
   2   3  -214672.99 1235.99   1-0.99430-0.75064 0.90438 0.63842-0.04781-0.43458
  -2  -3   214452.62 1293.06   1-0.90296-1.14662 0.29145 0.55741-0.59065-0.20388
  -2  -3   210444.91 1133.27   1-0.97861-1.22196-1.18976-0.92539-0.97861-0.59243
   2   3  -213215.90 1351.85   1-0.30052-0.05717-1.57335-1.83773-0.30052-0.68670
   2   3  -214998.75 1280.31   1-0.91278-0.66967 1.05074 0.78570 0.02829-0.35811
  -2  -3   211955.29 1427.05   1-0.98172-1.22509 0.03745 0.30299-0.68831-0.30185
   2   3  -311801.99 1206.33   1-0.55275-0.24805 1.65366 1.53949 0.55275 0.24376
  -2  -3   313090.49 1035.02   1-0.24589-0.55059 1.54156 1.65573 0.24589 0.55488
   2   3  -312278.60 1110.03   1-0.99486-0.69053 0.95715 0.84254 0.00614-0.30282
  -2  -3   311129.52 1005.61   1-0.87147-1.17580 0.17611 0.29074-0.67868-0.36971
  -2  -3   312372.59 1317.42   1-0.91203-1.21625-0.34565-0.23283-0.91203-0.60397
   2   3  -3 9903.22 1321.24   1-0.89993-0.59594-1.44484-1.55783-0.89993-1.20817
   2   3  -311102.75 1246.93   1-0.84162-0.53788 1.27721 1.16357 0.22894-0.07966
  -2  -3   311124.43 1392.73   1-0.91108-1.21510-0.43077-0.31651-0.94499-0.63632
   2   3  -491933.46 2877.60   1-0.68563-0.32011 1.63860 1.67583 0.68563 0.45453
   2   3  -478015.15 2849.15   1-0.98766-0.62266 1.10801 1.14472 0.16906-0.06210
  -2  -3   480666.27 3861.86   1-0.77855-1.14356-0.10371-0.14042-0.87593-0.64476
  -2  -3   481787.25 3435.19   1-0.78514-1.14998 0.06598 0.02735-0.78514-0.55509
   2   3  -483049.92 2749.90   1-0.99484-0.63023-0.95186-0.91345-0.99484-1.22514
   2   3  -5  801.23  262.76   1-0.79672-0.37038 1.57705 1.76571 0.79672 0.64350
  -2  -3   5  819.45  402.22   1-0.46995-0.89629 1.64070 1.45204 0.46995 0.62317
   2   3  -5  386.66  385.23   1-0.88037-0.45496 1.47622 1.66535 0.65531 0.50253
  -2  -3   5  832.02  291.51   1-0.69606-1.12153 0.28719 0.09714-0.69606-0.54401
   2   3  -5  721.95  267.90   1-0.97386-0.54862-0.66789-0.47811-0.97386-1.12623
   2   3  -6  267.07  151.34   1-0.88192-0.39477 1.47645 1.81652 0.88192 0.80658
  -2  -3   6  197.75  165.90   1-0.53151-1.01866 1.65178 1.31169 0.53151 0.60684
  -2  -3   6  218.04  175.46   1-0.62638-1.11249 0.43865 0.09713-0.62638-0.55235
   2   3  -6  177.27  149.58   1-0.95140-0.46530-0.52785-0.18634-0.95140-1.02543
  -2  -3   6  134.21  361.04   1 0.02435-0.46129 1.84342 1.50290 1.23028 1.30550
   2   3  -6  294.03  192.75   1-0.59639-0.11037-1.27752-0.93790-1.27346-1.34878
   2   3  -7 5250.46  929.77   1-0.94148-0.39351 1.34631 1.83782 0.94148 0.94404
  -2  -3   7 5682.51  826.35   1-0.56806-1.11603 1.65438 1.16288 0.56806 0.56551
  -2  -3   7 5553.82  887.14   1-0.56590-1.11263 0.55847 0.06554-0.56590-0.56987
   2   3  -7 5695.79  754.17   1-0.93938-0.39265-0.46652 0.02642-0.93938-0.93540
  -2  -3   7 3255.71 1051.42   1-0.43889-0.98516 1.81331 1.32141 0.87405 0.87146
   2   3  -7 4020.91 1070.53   1-0.84587-0.29921-0.68420-0.19328-1.06435-1.06187
   2   3  -836554.44 1779.73   1-0.97778-0.36900 1.19497 1.83790 0.97778 1.05823
  -2  -3   832784.25 2381.17   1-0.58525-1.19403 1.65450 1.01157 0.58525 0.50481
  -2  -3   832409.89 2070.13   1-0.50991-1.11728 0.66138 0.01699-0.50991-0.59190
   2   3  -832320.55 2040.50   1-0.93565-0.32829-0.44871 0.19567-0.93565-0.85366
  -2  -3   821085.24 2198.33   1-0.53259-1.13950 1.74774 1.10445 0.76286 0.68248
   2   3  -9  229.74  165.14   1-0.99366-0.32406 1.02849 1.82283 0.99366 1.15199
  -2  -3   9  181.70  163.19   1-0.45607-1.12406 0.75396-0.04186-0.45607-0.61607
  -2  -3   9  149.50  186.19   1-0.55403-1.22157 1.72909 0.93441 0.73502 0.57684
   2   3 -10 8719.36 1026.52   1-0.99158-0.26116 0.85066 1.79640 0.99158 1.22779
  -2  -3  10 8739.96 1096.12   1-0.40304-1.13165 0.83966-0.10762-0.40304-0.64105
  -2  -3  10 6144.46 1056.40   1-0.54600-1.27418 1.73624 0.79018 0.74556 0.50958
  -2  -3  11 1772.32  556.31   1-0.35001-1.13926 0.92034-0.17838-0.35001-0.66603
   2   2   711386.02 1303.46   1-0.91760-1.28093 1.40372-0.07149 0.54366-0.44468
   2   2   711337.02 1457.88   1-0.04289-0.40606 1.30245-0.17175-0.04289-1.03217
   2   2   710814.23 1265.48   1-0.77160-1.13524 1.43467-0.03974 0.38335-0.60440
   2   2   6  120.68  166.47   1-0.94071-1.24339 1.34279 0.01904 0.45791-0.45256
   2   2   6  128.55  154.47   1-0.06561-0.36815 1.27878-0.04399-0.06561-0.97688
   2   2   6  108.16  137.84   1-0.79980-1.10281 1.37673 0.05371 0.32476-0.58519
   2   2   5 1780.43  477.05   1-0.96816-1.20957 0.62777-0.54473 0.96816 0.13454
   2   2   5 1817.30  583.91   1-0.95842-1.20047 1.28175 0.10947 0.37738-0.45522
   2   2   5 1987.48  559.33   1-0.07961-0.32153 1.26383 0.09251-0.07961-0.91287
  -2  -2  -422712.92 1681.53   1-0.12973 0.05101-1.20814-0.18716 0.12973 0.88534
   2   2   421116.69 1867.53   1-0.90777-1.08852 0.32849-0.69248 0.90777 0.15216
   2   2   418750.12 1741.36   1-0.97148-1.15295 1.22252 0.20187 0.30331-0.45138
  -2  -2  -419421.34 1329.50   1-0.89819-0.71672 0.27296 1.29360-0.60504 0.14965
   2   2   421812.20 1776.62   1-0.08126-0.26255 1.26205 0.24217-0.08126-0.83651
  -2  -2  -421353.80 1492.28   1-0.69515-0.51386 0.28929 1.30915-0.69515 0.06009
   2   2   419882.79 1472.99   1-0.84513-1.02687 1.26797 0.24774 0.22031-0.53405
  -2  -2  -354867.83 2595.04   1-0.09145 0.02864-1.25099-0.38151 0.09145 0.76906
   2   2   350436.79 2709.48   1-0.80238-0.92247-0.01843-0.88789 0.80238 0.12477
   2   2   353093.46 2613.20   1-0.98065-1.10144 1.16711 0.29778 0.23702-0.43987
  -2  -2  -350680.96 2514.57   1-0.92257-0.80179 0.37227 1.24160-0.52655 0.15034
   2   2   349761.17 2987.22   1-0.06393-0.18459 1.28055 0.41210-0.06393-0.74117
  -2  -2  -352636.04 2567.86   1-0.63088-0.51023 0.42933 1.29773-0.63088 0.04634
   2   2   352084.30 2405.03   1-0.86192-0.98303 1.22151 0.35266 0.17755-0.49901
  -2  -2  -358749.88 2443.49   1-0.99487-0.87391 0.34805 1.21683-0.49355 0.18301
  -2  -2  -2203771.8 4948.05   1-0.01906 0.04037-1.32653-0.60857 0.01906 0.61866
   2   2   2189762.0 5086.17   1-0.64133-0.70077-0.40746-1.12541 0.64133 0.04173
  -2  -2  -2196424.6 4751.23   1-0.94207-0.88196 0.46284 1.18082-0.45226 0.14683
   2   2   2187008.6 5737.25   1-0.01473-0.07476 1.33081 0.61382-0.01473-0.61396
  -2  -2  -2207953.1 5010.98   1-0.54588-0.48585 0.59610 1.31308-0.54588 0.05334
   2   2   2191789.8 6008.57   1-0.87400-0.93448 1.18551 0.46804 0.14509-0.45367
  -2  -2  -1 6300.29  752.18   1 0.09202 0.09080-1.42855-0.86211-0.09202 0.42957
   2   2   1 5492.90  949.64   1-0.42077-0.41956-0.81158-1.37801 0.42077-0.10082
   2   2   1 5644.90  720.40   1-0.98989-0.98933 1.08259 0.51594 0.14061-0.38068
  -2  -2  -1 6254.37  732.77   1-0.95698-0.95754 0.54261 1.10925-0.38460 0.13668
   2   2   1 5625.61  789.62   1 0.09344 0.09404 1.42975 0.86420 0.09344-0.42777
  -2  -2  -1 6307.12  812.95   1-0.42077-0.42137 0.81159 1.37713-0.42077 0.10044
   2   2   1 6257.71  919.00   1-0.87970-0.87954 1.16765 0.60160 0.12922-0.39174
   2   2   023737.44 1577.02   1-0.15677-0.09490-1.17662-1.59155 0.15677-0.28682
   2   2   023779.46 1541.39   1-0.23988-0.17868 1.53780 1.12276 0.23988-0.20375
   2   2   027782.92 1671.01   1-0.99111-0.92987 1.06600 0.65068 0.12227-0.32122
  -2  -2   028535.43 1591.86   1-0.96751-1.02874 0.60778 1.02310-0.32769 0.11580
  -2  -2   029763.72 1785.22   1-0.20576-0.26698 1.11691 1.53102-0.20576 0.23744
  -2  -2   028333.65 1866.44   1-0.31685-0.37787-1.58196-1.16789-0.31685 0.12629
   2   2   026338.78 1708.24   1-0.87471-0.81392 1.18332 0.76865 0.14315-0.30001
  -2  -2   028516.09 1935.88   1-0.98594-1.04697 0.58679 1.00171-0.33002 0.11319
   2   2  -185280.79 3327.89   1-0.98991-0.86800 1.08235 0.81837 0.14034-0.22535
  -2  -2   196374.38 3475.60   1-0.70840-0.83005-1.63041-1.36771-0.70840-0.34319
   2   2  -188886.77 3268.77   1-0.21362-0.09199-1.52068-1.78339-0.21362-0.57883
   2   2  -199311.32 3440.79   1-0.84534-0.72391 1.26742 1.00413 0.21980-0.14557
  -2  -2   1103725.1 3815.94   1-0.98169-1.10337 0.63820 0.90182-0.29312 0.07230
   2   2  -291890.44 4032.79   1-0.57906-0.39623 1.65454 1.54233 0.57906 0.29119
  -2  -2   294232.21 3263.36   1-0.33451-0.51734 1.59078 1.70299 0.33451 0.62237
   2   2  -294727.39 3466.10   1-0.98219-0.79960 1.15595 1.04330 0.22398-0.06391
  -2  -2   295596.92 3184.17   1-0.97435-1.15693 0.65635 0.76900-0.28428 0.00361
  -2  -2   282106.25 3695.67   1-0.98714-1.16943-1.12313-1.01182-0.98714-0.69987
   2   2  -296933.68 3468.51   1-0.77370-0.59141-1.59479-1.70610-0.77370-1.06097
   2   2  -286597.76 3398.21   1-0.72879-0.54674 1.51157 1.39965 0.46503 0.17745
  -2  -2   285949.21 3379.91   1-0.98182-1.16416 0.63677 0.74911-0.29415-0.00651
   2   2  -374666.45 3018.90   1-0.72429-0.48064 1.62350 1.66270 0.72429 0.51431
  -2  -2   378956.49 3058.29   1-0.49671-0.74035 1.64648 1.60727 0.49671 0.70668
   2   2  -376233.27 2639.68   1-0.94349-0.70046 1.33424 1.37362 0.44633 0.23664
  -2  -2   378440.21 3128.60   1-0.96308-1.20633 0.57918 0.54050-0.35285-0.14276
  -2  -2   379930.92 3119.65   1-0.94133-1.18445-0.47606-0.51629-0.94133-0.73216
   2   2  -368588.73 2731.62   1-0.98485-0.74194-1.14404-1.10398-0.98485-1.19419
   2   2  -370949.78 2983.62   1 0.08276 0.32545 1.81748 1.85695 1.25563 1.04585
   2   2  -4  430.35  178.91   1-0.83575-0.53128 1.53898 1.72961 0.83575 0.70366
   2   2  -4  385.73  275.48   1-0.70418-0.40051 1.63558 1.82644 0.99388 0.86206
  -2  -2   4  451.27  238.26   1-0.83562-1.13936-0.07902-0.27068-0.83562-0.70446
   2   2  -4  398.49  225.14   1-0.98680-0.68326-0.78444-0.59298-0.98680-1.11820
   2   2  -513678.90 1060.97   1-0.91355-0.54827 1.41721 1.75926 0.91355 0.85934
  -2  -2   513474.48 1221.37   1-0.66451-1.02980 1.64454 1.30248 0.66451 0.71872
  -2  -2   514244.37 1556.38   1-0.74500-1.10938 0.17021-0.17289-0.74500-0.69185
   2   2  -514021.05 1179.28   1-0.96262-0.59825-0.59229-0.24919-0.96262-1.01577
  -2  -2   5 6319.20 1620.74   1-0.78925-1.15321 1.39916 1.05691 0.34719 0.40137
   2   2  -5 9649.89 1159.04   1-0.66738-0.30306-1.14422-0.80271-1.23732-1.29162
   2   2  -657067.91 2831.44   1-0.96251-0.53641 1.27224 1.76571 0.96251 0.98619
  -2  -2   653098.72 3117.73   1-0.69833-1.12442 1.63428 1.14079 0.69833 0.67464
  -2  -2   654524.33 3009.07   1-0.66879-1.09379 0.34837-0.14617-0.66879-0.69365
   2   2  -650388.96 2961.94   1-0.94617-0.52117-0.50038-0.00583-0.94617-0.92131
  -2  -2   636086.38 3006.86   1-0.80645-1.23104 1.36207 0.86845 0.31030 0.28669
   2   2  -642852.90 3319.24   1-0.83729-0.41231-0.71251-0.21968-1.07674-1.05323
  -2  -2   7151975.8 4585.10   1-0.71223-1.19914 1.62882 0.98393 0.71223 0.61066
  -2  -2   7154532.3 6472.82   1-0.60146-1.08709 0.48920-0.15678-0.60146-0.70433
   2   2  -7153769.5 6056.25   1-0.93884-0.45322-0.46394 0.18204-0.93884-0.83598
   2   2  -7135373.4 4449.79   1-0.87529-0.38964-0.57949 0.06462-1.01683-0.91555
   2   2  -8   13.73   90.95   1-0.99479-0.44706 0.94596 1.74226 0.99479 1.17425
  -2  -2   8   42.16  100.10   1-0.71166-1.25939 1.62907 0.83277 0.71166 0.53220
  -2  -2   8    6.91   89.88   1-0.53930-1.08555 0.60825-0.18917-0.53930-0.72018
  -2  -2   8   26.68  120.12   1-0.76594-1.31180 1.44555 0.64913 0.39462 0.21540
   2   2  -9  989.07  294.77   1-0.98574-0.37719 0.77255 1.72026 0.98574 1.24308
  -2  -2   9  803.18  369.14   1-0.48005-1.08694 0.71346-0.23540-0.48005-0.73894
  -2  -2   9  868.81  412.82   1-0.73361-1.34010 1.50349 0.55570 0.45622 0.19921
   2   2 -10  181.77  174.50   1-0.96247-0.29404 0.59135 1.69151 0.96247 1.29891
  -2  -2  10  254.28  193.33   1-0.42227-1.08978 0.80917-0.29112-0.42227-0.75917
  -2  -2  10  214.05  219.96   1-0.69565-1.36276 1.56348 0.46429 0.52324 0.18843
   2   1   7 1963.20  617.90   1-0.89347-1.31790 1.45343 0.13144 0.61883-0.27068
   2   1   7 1759.16  490.01   1-0.05539-0.47966 1.28951-0.03165-0.05539-0.94578
   2   1   7 1992.04  531.88   1-0.74714-1.17183 1.48010 0.15881 0.43100-0.45792
   2   1   6   53.95  106.21   1-0.99321-1.35797 1.03940-0.13075 0.99321 0.18127
   2   1   6   73.45  121.18   1-0.91764-1.28145 1.40360 0.23308 0.54350-0.26814
   2   1   6  116.29  173.21   1-0.07305-0.43670 1.27086 0.10114-0.07305-0.88543
   2   1   6   61.75  151.93   1-0.77225-1.13630 1.43340 0.26351 0.38205-0.42907
  -2  -1  -565484.60 2966.01   1-0.18052 0.12211-1.14811-0.12894 0.18052 0.91519
   2   1   553372.82 2746.13   1-0.98697-1.29092 0.78642-0.23232 0.98697 0.25292
   2   1   564893.85 2536.67   1-0.93634-1.23950 1.35562 0.33655 0.47548-0.25830
  -2  -1  -563795.41 2947.30   1-0.92310-0.61989 0.37457 1.39328-0.52469 0.20893
   2   1   560460.60 2597.04   1-0.08044-0.38346 1.26293 0.24464-0.08044-0.81481
  -2  -1  -447945.06 2840.87   1-0.15172 0.09026-1.18258-0.31494 0.15172 0.80838
   2   1   448508.85 3392.27   1-0.93729-1.17927 0.45649-0.41118 0.93729 0.28062
   2   1   455503.65 2949.54   1-0.95020-1.19272 1.31215 0.44454 0.41689-0.23902
  -2  -1  -456451.44 2320.32   1-0.94984-0.70730 0.50294 1.37028-0.41852 0.23729
   2   1   453546.96 2673.68   1-0.07283-0.31522 1.27110 0.40425-0.07283-0.72919
  -2  -1  -454707.09 2489.41   1-0.60547-0.36308 0.48118 1.34801-0.60547 0.05088
   2   1   452718.99 2956.36   1-0.80857-1.05137 1.35730 0.49019 0.30561-0.34991
  -2  -1  -456844.97 2415.66   1-0.99121-0.74857 0.49975 1.36663-0.39110 0.26444
  -2  -1  -3 2094.84  466.12   1-0.07926 0.10206-1.26421-0.54806 0.07926 0.65792
   2   1   3 1891.75  513.92   1-0.82167-1.00299 0.03710-0.67906 0.82167 0.24300
   2   1   3 2137.54  534.58   1-0.95964-1.14154 1.27683 0.56069 0.37109-0.20696
  -2  -1  -3 2222.18  407.70   1-0.97042-0.78856 0.62768 1.34370-0.31001 0.26800
   2   1   3 1791.55  638.05   1-0.04150-0.22326 1.30387 0.58848-0.04150-0.61984
  -2  -1  -3 2190.82  500.85   1-0.51634-0.33458 0.64993 1.36532-0.51634 0.06200
   2   1   3 2229.50  455.68   1-0.81790-1.00005 1.33585 0.62014 0.28474-0.29299
  -2  -1  -3 2327.49  427.39   1-0.98285-0.80088 0.62512 1.34070-0.30257 0.27518
  -2  -1  -2 1274.26  327.47   1 0.04917 0.16983-1.39118-0.82654-0.04917 0.45149
   2   1   2 1247.41  505.88   1-0.60400-0.72467-0.48413-1.04877 0.60400 0.10334
  -2  -1  -2 1406.55  337.35   1-0.98490-0.86371 0.74925 1.31394-0.19874 0.30148
   2   1   2 1227.55  383.95   1 0.03057-0.09055 1.37418 0.81024 0.03057-0.46976
  -2  -1  -2 1357.47  422.13   1-0.39184-0.27071 0.85709 1.42104-0.39184 0.10848
   2   1   2 1426.45  395.36   1-0.81806-0.93958 1.33549 0.77115 0.28438-0.21555
  -2  -1  -2 1474.57  344.21   1-0.96830-0.84678 0.75827 1.32261-0.20441 0.29552
   2   1   110029.55 1021.81   1-0.26655-0.32656-1.03797-1.45108 0.26655-0.15610
   2   1   110523.87  943.46   1-0.23604-0.29672 1.53535 1.12231 0.23604-0.18645
   2   1   111627.11 1177.46   1-0.96474-1.02535 1.25514 0.84192 0.34366-0.07865
  -2  -1  -112630.62 1062.09   1-0.99310-0.93258 0.86817 1.28152-0.08402 0.33839
  -2  -1  -111687.09 1082.06   1-0.19928-0.13878 1.12501 1.53752-0.19928 0.22303
   2   1   112115.47 1237.45   1-0.80221-0.86310 1.37146 0.95849 0.31955-0.10259
   2   1   057011.50 2505.22   1 0.12454 0.12518-1.45523-1.71684-0.12454-0.46919
   2   1   061677.38 2390.80   1-0.45400-0.45386 1.63657 1.37492 0.45400 0.10939
   2   1   058093.07 3023.71   1-0.95617-0.95615 1.29049 1.02871 0.38863 0.04417
  -2  -1   064291.94 2382.66   1-0.99456-0.99472 0.98512 1.24715 0.03533 0.37995
  -2  -1   058784.18 2583.78   1 0.12608 0.12596 1.45644 1.71753 0.12608 0.47040
  -2  -1   060677.82 2634.54   1-0.45510-0.45505-1.63686-1.37583-0.45510-0.11085
   2   1   063292.96 2945.02   1-0.75109-0.75135 1.47302 1.21146 0.42348 0.07914
  -2  -1   1 1074.14  324.68   1-0.44406-0.50501 1.63374 1.74397 0.44406 0.71079
   2   1  -1  994.74  336.92   1-0.92677-0.86612 1.38143 1.27112 0.51158 0.24499
  -2  -1   1 1039.89  333.32   1-0.82775-0.88833-1.54772-1.43806-0.82775-0.56143
   2   1  -1 1016.53  339.69   1-0.60325-0.54267-1.65379-1.76344-0.60325-0.86957
   2   1  -1 1093.85  347.97   1-0.59689-0.53651 1.68722 1.57703 0.67636 0.40981
  -2  -1   1  970.18  382.05   1-0.82377-0.88415 1.32191 1.43210 0.27130 0.53785
   2   1  -242845.42 1804.99   1-0.80024-0.67847 1.57405 1.61525 0.80024 0.61140
  -2  -1   242352.62 2002.60   1-0.64155-0.76332 1.64933 1.60813 0.64155 0.83039
   2   1  -239323.56 2211.24   1-0.83028-0.70899 1.54434 1.58549 0.77512 0.58639
  -2  -1   241616.80 2362.88   1-0.97203-1.09353 1.21962 1.17898 0.29977 0.48879
  -2  -1   246995.85 2566.93   1-0.99395-1.11517-1.02027-1.06200-0.99395-0.80557
   2   1  -245151.51 2837.56   1-0.93223-0.81102-1.37240-1.33068-0.93223-1.12062
   2   1  -240891.08 2365.40   1-0.07079 0.05021 1.87201 1.91321 1.17998 0.99123
  -2  -1   239718.38 2191.03   1-0.59490-0.71591 1.68929 1.64809 0.67917 0.86792
   2   1  -385685.68 3013.06   1-0.89677-0.71419 1.45075 1.64337 0.89677 0.78581
  -2  -1   389902.75 2989.04   1-0.74734-0.92993 1.61155 1.41894 0.74734 0.85830
   2   1  -393913.74 3275.11   1-0.48669-0.30476 1.65346 1.84607 1.22712 1.11626
  -2  -1   388131.44 3390.57   1-0.94385-1.12585-0.48859-0.68182-0.94385-0.83356
   2   1  -393691.73 3450.78   1-0.99487-0.81303-0.96582-0.77271-0.99487-1.10531
  -2  -1   387968.53 3607.66   1 0.09141-0.09022 1.81307 1.62048 1.25901 1.36996
  -2  -1   383623.89 3715.34   1-0.82445-1.00644-0.75323-0.94537-1.09420-0.98315
   2   1  -488067.14 2753.53   1-0.95434-0.71094 1.30406 1.64809 0.95434 0.92127
   2   1  -490617.45 3009.70   1-0.97904-0.73657-0.70887-0.36437-0.97904-1.01154
  -2  -1   476289.43 3520.58   1-0.99450-1.23714 0.29151-0.05193-0.53047-0.49722
   2   1  -481753.91 3314.45   1-0.64098-0.39833-1.19622-0.85278-1.25235-1.28561
   2   1  -518059.32 1271.52   1-0.98439-0.68017 1.14786 1.64330 0.98439 1.02920
  -2  -1   518437.03 1507.09   1-0.82397-1.12819 1.55166 1.05622 0.82397 0.77916
  -2  -1   510870.69 1850.26   1-0.98670-1.29024 0.76911 0.27444-0.18001-0.22440
   2   1  -517798.40 1450.47   1-0.95934-0.65607-0.57255-0.07642-0.95934-0.91360
  -2  -1   517302.54 1408.83   1-0.97486-1.27815 0.70497 0.21023-0.24424-0.28877
   2   1  -517128.28 1399.20   1-0.80723-0.50392-0.80511-0.31038-1.11582-1.07129
   2   1  -632899.05 1871.38   1-0.99470-0.62967 0.98798 1.63485 0.99470 1.11740
  -2  -1   632705.58 2264.18   1-0.83044-1.19547 1.54483 0.89798 0.83044 0.70774
   2   1  -628976.23 2009.87   1-0.94783-0.58393-0.50893 0.13864-0.94783-0.82408
  -2  -1   627621.20 2445.38   1-0.94028-1.30382 0.92854 0.28180-0.07206-0.19450
   2   1  -630584.71 1883.26   1-0.85873-0.49477-0.64000 0.00603-1.04461-0.92229
   2   1  -770715.25 3529.83   1-0.99006-0.56421 0.82642 1.62468 0.99006 1.19064
  -2  -1   777142.55 4151.43   1-0.82537-1.25123 1.55021 0.75192 0.82537 0.62478
   2   1  -766081.38 3660.17   1-0.94370-0.51917-0.48782 0.31120-0.94370-0.74194
  -2  -1   761990.90 3456.78   1-0.90306-1.32723 1.08779 0.28966 0.05971-0.14052
   2   1  -758267.94 3415.86   1-0.87397-0.44935-0.58446 0.21286-1.01915-0.81904
   2   1  -8 8476.18  908.56   1-0.97324-0.48658 0.66335 1.61304 0.97324 1.25171
  -2  -1   8 7007.37 1075.75   1-0.81139-1.29806 1.56402 0.61432 0.81139 0.53292
  -2  -1   8 3870.66 1056.60   1-0.81396-1.29908 1.56154 0.61161 0.80900 0.53053
  -2  -1   8 7377.05 1081.59   1-0.86416-1.34896 1.21503 0.26551 0.17167-0.10637
   2   1  -9 3936.75  694.05   1-0.94524-0.39870 0.49562 1.59759 0.94524 1.30262
  -2  -1   9 4014.48  903.90   1-0.82289-1.36833 1.32405 0.22314 0.27335-0.08248
  -2  -1  1026055.98 2370.46   1-0.77851-1.38459 1.42106 0.16876 0.36938-0.06425
   2   0   821726.53 1898.94   1-0.82173-1.36791 1.55359 0.23334 0.79312-0.07543
   2   0   822808.95 1723.71   1-0.03574-0.58175 1.30974-0.00982-0.03574-0.90525
   2   0   824460.84 2090.22   1-0.68338-1.22976 1.58122 0.26168 0.54382-0.32407
   2   0   7 5308.12  990.64   1-0.85233-1.33788 1.51754 0.34875 0.72567-0.06502
   2   0   7 5398.62  865.60   1-0.05559-0.54097 1.28930 0.12116-0.05559-0.84709
   2   0   7 5688.10 1115.90   1-0.70838-1.19412 1.54424 0.37609 0.50135-0.28874
   2   0   6 6253.09  982.64   1-0.95906-1.38488 1.28626 0.26949 0.95906 0.24614
   2   0   6 7528.23 1170.28   1-0.87603-1.30094 1.48324 0.46591 0.66684-0.04598
  -2   0  -6 7541.07  880.89   1-0.94138-0.51642 0.45939 1.47611-0.45514 0.25740
   2   0   6 7481.61 1067.97   1-0.06645-0.49120 1.27789 0.26119-0.06645-0.77994
   2   0   6 7386.82 1106.77   1-0.72798-1.15307 1.51292 0.49616 0.46651-0.24578
  -2   0  -5  572.22  296.21   1-0.21125 0.15261-1.11000-0.24416 0.21125 0.84697
   2   0   5  822.95  360.21   1-0.99034-1.35535 1.08712 0.22179 0.99034 0.35531
   2   0   5  988.20  326.34   1-0.89332-1.25759 1.45372 0.58786 0.61928-0.01567
  -2   0  -5  885.71  275.16   1-0.96872-0.60443 0.61589 1.48127-0.32050 0.31423
   2   0   5  935.82  351.80   1-0.06469-0.42882 1.27974 0.41450-0.06469-0.70017
  -2   0  -5  818.52  323.95   1-0.59689-0.23277 0.49828 1.36353-0.59689 0.03858
   2   0   5  871.68  337.60   1-0.74119-1.10565 1.49053 0.62515 0.44219-0.19230
  -2   0  -5 1093.98  311.18   1-0.98340-0.61909 0.61869 1.48366-0.30719 0.32731
  -2   0  -447534.75 3641.73   1-0.14088 0.16232-1.19526-0.48091 0.14088 0.69861
   2   0   454321.08 3305.05   1-0.98730-1.29148 0.79024 0.07631 0.98730 0.43015
   2   0   458417.17 3461.36   1-0.90413-1.20776 1.43285 0.71844 0.58705 0.02995
  -2   0  -455089.36 3272.25   1-0.98695-0.68334 0.77207 1.48612-0.17720 0.37973
   2   0   456120.80 3317.05   1-0.04398-0.34747 1.30133 0.58751-0.04398-0.60145
  -2   0  -459706.47 2841.45   1-0.50884-0.20535 0.66328 1.37706-0.50884 0.04861
  -2   0  -462582.91 3084.25   1-0.96643-0.66259 0.77214 1.48613-0.19394 0.36276
  -2   0  -316243.60 1102.41   1 0.02132 0.26388-1.36556-0.80272-0.02132 0.45839
   2   0   314159.40 1612.87   1-0.89634-1.13890 0.28416-0.27868 0.89634 0.41662
   2   0   316316.44 1533.32   1-0.90750-1.15050 1.42592 0.86297 0.57656 0.09733
  -2   0  -317059.78 1321.02   1-0.99475-0.75181 0.92933 1.49205-0.02248 0.45666
   2   0   315095.95 1441.73   1 0.00730-0.23555 1.35225 0.78991 0.00730-0.47214
   2   0   315357.69 1348.01   1-0.73841-0.98161 1.49532 0.93272 0.44736-0.03154
  -2   0  -315721.64 1337.96   1-0.93784-0.69464 0.94070 1.50329-0.06230 0.41660
   2   0   251459.02 2900.62   1-0.56671-0.74861-0.55693-0.96828 0.56671 0.16499
   2   0   239265.92 2526.23   1-0.30152-0.48407 1.57389 1.16281 0.30152-0.09984
  -2   0  -248377.89 2199.82   1-0.98937-0.80711 1.08902 1.50040 0.14776 0.54910
   2   0   252848.53 2711.67   1 0.11125-0.07097 1.44449 1.03359 0.11125-0.29018
   2   0   251805.57 2637.19   1-0.70935-0.89192 1.54275 1.13152 0.49966 0.09855
  -2   0  -256688.49 2262.62   1-0.89056-0.70799 1.13198 1.54320 0.09786 0.49897
   2   0   123972.67 1609.80   1 0.08533-0.03590-1.42288-1.68271-0.08533-0.40904
   2   0   124213.06 1814.17   1-0.61177-0.73351 1.65314 1.39348 0.61177 0.28829
   2   0   128455.68 1805.14   1-0.87513-0.99685 1.48467 1.22463 0.66921 0.34570
  -2   0  -126643.22 1527.30   1-0.96542-0.84369 1.25209 1.51212 0.33983 0.66334
   2   0   125380.24 1637.26   1-0.63691-0.75885 1.64205 1.38221 0.61758 0.29427
  -2   0  -129252.02 1718.52   1-0.80821-0.68627 1.35813 1.61798 0.30643 0.62974
   2   0   0124618.4 4065.81   1-0.81502-0.87594 1.56059 1.45233 0.81502 0.56942
  -2   0   0133768.6 3854.34   1-0.60018-0.53926 1.65398 1.76222 0.60018 0.84578
   2   0   0129517.3 3906.85   1-0.81074-0.87182 1.56470 1.45612 0.81545 0.56981
  -2   0   0153237.2 4617.59   1-0.91226-0.85118 1.41572 1.52430 0.56133 0.80697
   2   0   0143936.9 4697.20   1-0.42751-0.48863-1.62861-1.73661-0.42751-0.67286
   2   0   0134396.9 4202.76   1-0.46304-0.52434 1.79875 1.69028 0.84693 0.60141
  -2   0   150685.08 2387.90   1-0.81450-0.81439 1.56108 1.51791 0.81450 0.98221
   2   0  -150414.46 2465.31   1-0.65400-0.65445 1.65185 1.69474 1.06024 0.89246
   2   0  -158198.68 2481.85   1-0.81412-0.81461-1.56144-1.51804-0.81412-0.98154
   2   0  -153597.10 2253.62   1-0.05941-0.06008 1.86948 1.91242 1.18658 1.01887
  -2   0   146970.04 2058.07   1-0.32352-0.32284 1.86294 1.82001 0.99048 1.15820
   2   0  -273365.34 2807.75   1-0.96756-0.90685 1.24986 1.44444 0.96756 0.87773
  -2   0   268092.32 2574.63   1-0.89196-0.95268 1.45944 1.26486 0.89196 0.98179
   2   0  -273268.07 2815.28   1-0.30438-0.24420 1.58795 1.78231 1.33949 1.24959
  -2   0   269509.46 2905.59   1-0.62870-0.68889 1.65688 1.46253 1.09042 1.18032
   2   0  -278211.70 2595.53   1-0.97716-0.91702-1.19882-1.00406-0.97716-1.06664
  -2   0   265061.04 2708.76   1-0.54495-0.60526-1.36233-1.55639-1.29189-1.20187
   2   0  -269620.80 2921.41   1-0.19339-0.13301-1.75052-1.55646-1.29192-1.38189
   2   0  -3 2689.08  510.59   1-0.98949-0.86796 1.09784 1.44385 0.98949 0.97755
  -2   0   3 2421.96  528.46   1-0.92006-1.04158 1.40262 1.05661 0.92006 0.93200
  -2   0   3 2228.33  458.11   1-0.36753-0.48835 1.61730 1.27148 1.30744 1.31947
  -2   0   3 2515.59  651.98   1-0.23902-0.36013-1.09382-1.43911-1.36575-1.35342
  -2   0   3 2382.34  484.85   1-0.93503-1.05594-0.44582-0.79210-0.93503-0.92364
   2   0  -3 2702.25  542.54   1-0.99311-0.87235-0.88157-0.53540-0.99311-1.00466
  -2   0   3 2513.59  539.92   1-0.89315-1.01411-0.50881-0.85416-0.98331-0.97109
   2   0  -3 2649.07  564.25   1-0.58827-0.46730-1.29152-0.94619-1.27677-1.28900
   2   0  -4 8367.71  843.79   1-0.99483-0.81249 0.95095 1.44837 0.99483 1.06078
  -2   0   4 6546.67  936.43   1-0.92819-1.11054 1.38291 0.88549 0.92819 0.86224
  -2   0   4 5464.36  994.45   1-0.10797-0.28943 1.45744 0.96017 1.39865 1.33282
  -2   0   4 6374.68  962.89   1-0.69126-0.87304-0.31879-0.81540-1.01187-1.07732
  -2   0   4 7379.39 1143.10   1-0.84923-1.03076-0.12150-0.61922-0.84923-0.91585
   2   0  -4 7800.83  893.53   1-0.97687-0.79548-0.69111-0.19357-0.97687-0.91048
  -2   0   4 7186.71 1111.39   1-0.98566-1.16728 0.08746-0.40919-0.65827-0.72384
   2   0  -4 7150.53  858.86   1-0.76110-0.57947-0.93118-0.43454-1.16524-1.09968
   2   0  -5 2002.50  396.45   1-0.98865-0.74549 0.80703 1.45586 0.98865 1.13249
  -2   0   5 1865.86  588.35   1-0.92612-1.16928 1.38810 0.73927 0.92612 0.78229
  -2   0   5 1484.68  493.03   1 0.06878-0.17330 1.29323 0.64450 1.40359 1.25990
  -2   0   5 1301.92  444.45   1-0.90855-1.15101 0.31364-0.33432-0.57326-0.71652
  -2   0   5 1507.03  460.42   1-0.76618-1.00835 0.11626-0.53290-0.76618-0.91081
   2   0  -5 1644.03  417.80   1-0.96214-0.71998-0.58936 0.05981-0.96214-0.81751
  -2   0   5 1659.90  463.02   1-0.99282-1.23511 0.46035-0.18758-0.41819-0.56154
   2   0  -5 1570.61  439.18   1-0.82924-0.58696-0.73824-0.09032-1.08782-0.94447
   2   0  -6 1030.59  287.19   1-0.97335-0.66937 0.66413 1.46438 0.97335 1.19507
  -2   0   6 1032.72  376.37   1-0.91721-1.22118 1.40913 0.60888 0.91721 0.69549
  -2   0   6  875.27  403.27   1 0.16030-0.14242 1.19118 0.39099 1.38857 1.16702
  -2   0   6  829.35  404.39   1-0.98381-1.28694 0.73805-0.06125-0.20924-0.43031
  -2   0   6  919.11  327.00   1-0.68987-0.99266 0.30131-0.49929-0.68987-0.91251
   2   0  -6  937.20  290.11   1-0.95423-0.65144-0.54335 0.25727-0.95423-0.73159
  -2   0   6 1015.39  373.95   1-0.97353-1.27647 0.71642-0.08280-0.23574-0.45687
   2   0  -6  990.83  363.77   1-0.85555-0.55260-0.65116 0.14807-1.04964-0.82850
   2   0  -7135816.1 3264.00   1-0.94963-0.58563 0.51841 1.47068 0.94963 1.24995
  -2   0   7123687.8 3993.27   1-0.90251-1.26731 1.43987 0.48821 0.90251 0.60291
  -2   0   7103374.5 4615.64   1-0.99319-1.35699 1.02874 0.07813 0.08173-0.21712
  -2   0   7117933.5 4163.83   1-0.61914-0.98255 0.45351-0.49854-0.61914-0.91979
  -2   0   7113077.0 4746.00   1-0.94417-1.30729 0.90849-0.04276-0.08808-0.38715
   2   0  -7118969.5 4261.93   1-0.86262-0.49902-0.62615 0.32435-1.03833-0.73941
   2   0  -8 3483.22  684.30   1-0.91863-0.49398 0.37299 1.47678 0.91863 1.29696
  -2   0   8 2267.80  738.32   1-0.96815-1.39216 1.23925 0.13615 0.32388-0.05339
  -2   0   8 3159.95  569.83   1-0.55228-0.97633 0.58417-0.51931-0.55228-0.93094
  -2   0   8 3096.66  728.47   1-0.90886-1.33262 1.06598-0.03666 0.04115-0.33571
   2   0  -910707.10  986.08   1-0.88004-0.39473 0.22467 1.47995 0.88004 1.33636
  -2   0   9 9664.95 1240.05   1-0.48789-0.97257 0.69997-0.55498-0.48789-0.94457
  -2   0   9 9250.85 1281.51   1-0.86920-1.35359 1.20011-0.05392 0.15819-0.29647
  -2   0  10 6468.30  842.60   1-0.42490-0.97020 0.80496-0.60141-0.42490-0.95958
  -2   0  10 5961.32 1141.04   1-0.82541-1.37042 1.31798-0.08744 0.26752-0.26494
   2  -1   9  273.87  253.39   1-0.71940-1.38731 1.62879 0.31026 0.97184 0.12423
   2  -1   9  329.00  251.94   1-0.00829-0.67603 1.33714 0.01918-0.00829-0.85691
   2  -1   9  352.21  233.21   1-0.60797-1.27602 1.67531 0.35750 0.66048-0.18638
   2  -1   8  312.73  238.64   1-0.75631-1.36359 1.60815 0.44109 0.91407 0.14433
   2  -1   8  324.93  207.29   1-0.02938-0.63650 1.31620 0.14965-0.02938-0.80000
   2  -1   8  387.47  327.91   1-0.63225-1.23967 1.64762 0.48121 0.62463-0.14442
   2  -1   740685.20 3132.89   1-0.71927-1.26697 1.62579 0.61099 0.71927 0.02747
   2  -1   756796.17 4116.47   1-0.78404-1.33069 1.58819 0.57261 0.86608 0.17421
   2  -1   757213.95 4008.52   1-0.04228-0.58877 1.30307 0.28798-0.04228-0.73489
   2  -1   761561.21 4486.68   1-0.64995-1.19674 1.62593 0.61089 0.59751-0.09375
   2  -1   6  157.05  185.03   1-0.80288-1.28889 1.57210 0.70796 0.83085 0.21684
  -2   1  -6  160.98  158.67   1-0.98062-0.49459 0.70788 1.57130-0.23725 0.37641
   2  -1   6  178.99  188.23   1-0.04407-0.52993 1.30124 0.43758-0.04407-0.65867
   2  -1   6  137.21  171.29   1-0.65970-1.14584 1.61343 0.74977 0.58221-0.03126
  -2   1  -5  161.60  182.99   1-0.20504 0.22005-1.11782-0.40525 0.20504 0.74183
   2  -1   5  349.02  236.19   1-0.81212-1.23749 1.56336 0.85068 0.81270 0.27655
  -2   1  -5  218.72  162.28   1-0.99394-0.56858 0.89146 1.60354-0.06079 0.47507
   2  -1   5  244.40  172.94   1-0.02987-0.45509 1.31569 0.60349-0.02987-0.56645
   2  -1   5  284.59  254.75   1-0.65886-1.08439 1.61452 0.90224 0.58353 0.04785
  -2   1  -5  385.82  241.37   1-0.94953-0.52401 0.87943 1.59168-0.11108 0.42458
  -2   1  -420017.30 1775.10   1 0.08238 0.44683-1.42037-0.85932-0.08238 0.37640
   2  -1   414470.92 1807.64   1-0.78124-1.14649 1.58932 1.02877 0.78124 0.32310
   2  -1   425456.44 1573.50   1-0.80948-1.17421 1.56591 1.00469 0.81794 0.35966
  -2   1  -421177.31 1848.05   1-0.99043-0.62575 1.07552 1.63628 0.13277 0.59084
   2  -1   423655.86 1942.63   1 0.00880-0.35579 1.35368 0.79293 0.00880-0.44977
  -2   1  -424465.66 1522.19   1-0.40792-0.04332 0.83198 1.39276-0.40792 0.05065
  -2   1  -429310.86 1748.58   1-0.90789-0.54301 1.06970 1.63056 0.04430 0.50217
  -2   1  -3238560.5 5167.53   1-0.96419-0.66009 1.25758 1.66733 0.34672 0.72714
   2  -1   3246667.3 6109.56   1 0.08711-0.21685 1.42440 1.01507 0.08711-0.29345
  -2   1  -3254273.2 4633.21   1-0.25940 0.04456 1.04753 1.45684-0.25940 0.12115
  -2   1  -3240590.3 4870.25   1-0.84026-0.53601 1.28073 1.69024 0.23224 0.61232
   2  -1   2 1412.84  946.52   1-0.55759-0.80073-0.57421-0.83225 0.55759 0.25480
   2  -1   2 1120.54  878.21   1-0.89254-1.13567 0.26992 0.01189 0.89254 0.58975
  -2   1  -2 4868.14  771.11   1-0.90478-0.66132 1.43153 1.68982 0.58504 0.88759
  -2   1  -2 4820.36  644.89   1-0.04492 0.19841 1.30035 1.55824-0.04492 0.25762
  -2   1  -2 4870.67  706.35   1-0.23108 0.01235-1.53216-1.27448-0.23108 0.07123
   2  -1   2 4176.75  854.58   1-0.51173-0.75534 1.76453 1.50641 0.78906 0.48677
  -2   1  -2 4300.55  677.65   1-0.72741-0.48379 1.51384 1.77195 0.46753 0.76981
   2  -1   1 3365.81  713.59   1-0.99390-1.17670 0.90282 0.79653 0.99390 0.76943
  -2   1  -1 3257.38  740.29   1-0.85274-0.66994 1.51855 1.62483 0.85274 1.07720
   2  -1   1 4636.88  712.85   1-0.64397-0.82679 1.65409 1.54725 1.07246 0.84777
  -2   1  -1 4596.91  651.89   1-0.79681-0.61398 1.57754 1.68437 0.84246 1.06715
  -2   1  -1 3897.34  577.69   1-0.47225-0.28943-1.64125-1.53494-0.47225-0.24787
   2  -1   1 4221.38 1087.40   1-0.26683-0.44964-1.55428-1.66060-0.26683-0.49121
   2  -1   1 4299.09  655.56   1-0.33458-0.51756 1.85953 1.75281 0.98020 0.75572
  -2   1  -1 4444.73  763.75   1-0.53318-0.35019 1.74725 1.85397 0.76211 0.98660
  -2   1   0   70.12   91.73   1-0.96999-0.84801 1.23817 1.19302 0.96999 1.11657
   2  -1   0   79.62  108.67   1-0.45944-0.58163 1.64757 1.69222 1.24794 1.10114
  -2   1   0   82.96  100.93   1-0.62412-0.50193 1.65760 1.61296 1.09568 1.24249
  -2   1   0  159.21  116.59   1-0.77746-0.65527-1.59209-1.63717-0.77746-0.63101
   2  -1   0   90.09  101.56   1-0.64261-0.76480-1.64913-1.60407-0.64261-0.78906
   2  -1   0   57.90   79.42   1-0.01113-0.13348 1.85606 1.90073 1.21282 1.06614
  -2   1   0   61.58   89.23   1-0.21304-0.09068 1.88267 1.83799 1.08369 1.23037
   2  -1  -1446181.5 9375.36   1-0.15957-0.22113 1.49718 1.69329 1.38874 1.31980
  -2   1   1476555.9 8571.28   1-0.97095-0.90939-1.23330-1.42976-0.97095-0.90244
   2  -1  -1519763.6 8631.05   1-0.90590-0.96746-1.43318-1.23673-0.90590-0.97441
   2  -1  -1488621.1 6614.03   1-0.19534-0.25666-1.74912-1.55311-1.29242-1.36134
   2  -1  -231487.27 1626.99   1-0.98437-0.98472 0.75813 1.10610 0.98437 0.99356
  -2   1   230465.51 1859.26   1-0.98914-0.98879 1.10192 0.75396 0.98914 0.97995
  -2   1   233664.70 1933.96   1-0.14196-0.14104 1.48405 1.13650 1.39257 1.38365
  -2   1   228358.07 1812.71   1-0.21085-0.21021-1.12972-1.47697-1.37501-1.38375
  -2   1   233509.57 1858.59   1-0.98468-0.98375-0.76137-1.10919-0.98468-0.99410
   2  -1  -235645.76 1834.62   1-0.98893-0.98986-1.10433-0.75650-0.98893-0.97951
  -2   1   228050.07 2031.27   1-0.76029-0.75958-0.93325-1.28050-1.16602-1.17482
   2  -1  -235546.67 2258.97   1-0.52259-0.52331-1.39649-1.04924-1.29813-1.28931
   2  -1  -3 1213.58  341.83   1-0.97356-0.91309 0.66566 1.16504 0.97356 1.06063
  -2   1   3 1217.38  369.05   1 0.05914-0.00057 1.30330 0.80429 1.40447 1.31770
  -2   1   3 1107.82  392.51   1-0.54013-0.60017-0.62758-1.12616-1.18155-1.26809
  -2   1   3 1160.51  394.70   1-0.91819-0.97799-0.37111-0.87043-0.91819-1.00568
   2  -1  -3 1106.96  372.81   1-0.99201-0.93232-0.85854-0.35932-0.99201-0.90465
  -2   1   3 1111.63  332.73   1-0.92411-0.98405-0.36832-0.86687-0.91338-0.99997
   2  -1  -3 1155.58  394.51   1-0.70222-0.64227-1.07066-0.57212-1.21423-1.12765
   2  -1  -4 6536.17  779.54   1-0.95780-0.83700 0.56359 1.21463 0.95780 1.12305
  -2   1   4 6902.47  943.13   1-0.98330-1.10459 1.15667 0.50586 0.98330 0.81833
  -2   1   4 5568.93  938.74   1-0.76502-0.88572-0.13944-0.78936-0.89947-1.06380
   2  -1  -4 5976.82  737.90   1-0.18967-0.06897-1.15593-0.50598-1.38116-1.21679
  -2   1   4 6053.84  898.51   1-0.83579-0.95622-0.07954-0.73030-0.83579-1.00130
   2  -1  -4 6111.83  884.42   1-0.97931-0.85899-0.71119-0.06060-0.97931-0.81402
  -2   1   4 6760.46 1026.36   1-0.98336-1.10397 0.05717-0.59268-0.67653-0.84091
   2  -1  -4 6862.29  839.49   1-0.78775-0.66715-0.86045-0.21060-1.13808-0.97369
   2  -1  -542919.33 2322.57   1-0.93726-0.75580 0.45635 1.25891 0.93726 1.18052
  -2   1   551097.63 2782.38   1-0.97578-1.15788 1.20703 0.40480 0.97578 0.73293
  -2   1   539791.23 2656.53   1-0.89680-1.07818 0.26767-0.53358-0.60913-0.85127
   2  -1  -547799.82 3046.17   1-0.26076-0.07937-1.06531-0.26407-1.35777-1.11564
  -2   1   543846.92 2787.40   1-0.75551-0.93657 0.14373-0.65848-0.75551-0.99903
   2  -1  -545470.28 2552.15   1-0.96874-0.78768-0.63166 0.17055-0.96874-0.72522
  -2   1   543249.14 2451.11   1-0.99474-1.17601 0.37220-0.42892-0.47757-0.71973
   2  -1  -547304.72 2694.92   1-0.82699-0.64572-0.74532 0.05581-1.09083-0.84867
   2  -1  -6 6353.72  777.19   1-0.91149-0.66938 0.34343 1.29750 0.91149 1.23275
  -2   1   6 6736.40 1046.44   1-0.96449-1.20740 1.26375 0.31011 0.96449 0.64375
  -2   1   6 5655.24 1008.02   1-0.96534-1.20739 0.59352-0.35907-0.34027-0.66021
   2  -1  -6 5908.92  964.68   1-0.28884-0.04678-1.02742-0.07483-1.34636-1.02642
  -2   1   6 6386.22  830.78   1-0.68028-0.92196 0.32292-0.63071-0.68028-1.00180
  -2   1   6 5954.04  825.25   1-0.98367-1.22560 0.61547-0.33695-0.30951-0.62946
   2  -1  -6 5980.43  853.96   1-0.84294-0.60101-0.69398 0.25844-1.06865-0.74870
   2  -1  -7 6745.57  813.53   1-0.88016-0.57739 0.22510 1.33068 0.88016 1.27943
  -2   1   7 6302.19 1018.77   1-0.94877-1.25250 1.32337 0.21831 0.94877 0.55015
  -2   1   7 5535.76 1010.36   1-0.99255-1.29528 0.85600-0.24792-0.09605-0.49379
  -2   1   7 6111.78  744.51   1-0.60943-0.91174 0.47321-0.63187-0.60943-1.00898
  -2   1   7 6542.38 1055.62   1-0.96077-1.26285 0.81125-0.29312-0.16410-0.56200
   2  -1  -7 6204.49  845.74   1-0.84571-0.54312-0.68473 0.41898-1.06458-0.66685
   2  -1  -8 4796.82  809.27   1-0.84284-0.47941 0.10133 1.35840 0.84284 1.32009
  -2   1   8 3256.70  792.69   1-0.99072-1.35413 1.07159-0.18366 0.12843-0.34710
  -2   1   8 3908.37  776.76   1-0.54174-0.90468 0.60377-0.65276-0.54174-1.01929
  -2   1   8 3973.71  773.47   1-0.93008-1.29279 0.97741-0.27835-0.03251-0.50821
   2  -1  -915968.39 1321.76   1-0.79891-0.37483-0.02815 1.38044 0.79891 1.35417
  -2   1   915242.24 1358.25   1-0.47607-0.89964 0.72025-0.68771-0.47607-1.03164
  -2   1   914830.92 1654.38   1-0.89355-1.31689 1.12174-0.28541 0.08895-0.46454
   2  -2   9 5397.62 1211.46   1-0.62478-1.35380 1.65749 0.49217 1.09492 0.34613
   2  -2   9 5794.91 1022.00   1 0.00408-0.72476 1.34917 0.18422 0.00408-0.74565
   2  -2   9 5814.47 1066.85   1-0.54380-1.27289 1.73817 0.57346 0.74843 0.00039
   2  -2   8 1112.23  519.42   1-0.65612-1.32450 1.65134 0.63749 1.05762 0.38670
   2  -2   8 1258.46  450.67   1-0.00995-0.67817 1.33553 0.32201-0.00995-0.68168
   2  -2   8 1245.81  424.98   1-0.55912-1.22758 1.72444 0.71114 0.72828 0.05804
   2  -2   7 7282.80 1130.76   1-0.24378-0.85257 1.54024 0.67897 0.24378-0.34890
   2  -2   7 9840.42 1141.32   1-0.67522-1.28296 1.64606 0.78366 1.03330 0.44024
  -2   2  -7 9336.22 1220.33   1-0.98732-0.37954 0.77643 1.63789-0.17306 0.41953
   2  -2   710326.62 1184.94   1-0.01386-0.62145 1.33167 0.46960-0.01386-0.60758
   2  -2   710543.29 1348.27   1-0.56487-1.17270 1.71909 0.85716 0.72058 0.12814
  -2   2  -6 2889.05  562.01   1-0.27987 0.26716-1.01991-0.30907 0.27987 0.79578
   2  -2   6 2290.54  578.19   1-0.68093-1.22804 1.64422 0.93330 1.02576 0.51058
  -2   2  -6 2353.69  513.40   1-0.99459-0.44748 0.98342 1.69353 0.03354 0.54833
   2  -2   6 2273.54  594.09   1-0.00372-0.55068 1.34162 0.63099-0.00372-0.51943
   2  -2   6 2432.18  564.45   1-0.55801-1.10520 1.72546 1.01492 0.72975 0.21511
  -2   2  -6 2481.13  586.39   1-0.93569-0.38849 0.95116 1.66170-0.05385 0.46079
   2  -2   513927.02 1347.28   1-0.67018-1.15665 1.64756 1.08809 1.03983 0.60251
  -2   2  -514940.21 1209.38   1-0.97791-0.49147 1.18550 1.74428 0.25872 0.69571
   2  -2   514297.89 1413.58   1 0.02695-0.45937 1.37082 0.81166 0.02695-0.41073
  -2   2  -514135.47 1259.71   1-0.43627 0.05005 0.78656 1.34574-0.43627 0.00141
   2  -2   513427.98 1523.54   1-0.53311-1.01968 1.74732 1.18816 0.76221 0.32536
  -2   2  -514498.30 1410.13   1-0.88396-0.39739 1.15395 1.71309 0.11710 0.55395
   2  -2   430074.31 1760.28   1-0.63692-1.06276 1.65546 1.24745 1.08083 0.72138
  -2   2  -425560.95 1911.24   1-0.92952-0.50368 1.37432 1.78233 0.50153 0.86099
   2  -2   427085.80 1812.64   1 0.08919-0.33650 1.42615 1.01843 0.08919-0.27048
  -2   2  -431964.82 1759.53   1-0.30623 0.11946 0.98340 1.39113-0.30623 0.05344
   2  -2   428358.61 1819.84   1-0.48039-0.90633 1.78731 1.37954 0.82680 0.46775
  -2   2  -432634.16 1626.00   1-0.80224-0.37631 1.37139 1.77914 0.31948 0.67852
   2  -2   3   11.09   65.68   1-0.57072-0.93593 1.66149 1.40495 1.15243 0.87084
  -2   2  -3   28.72   77.85   1-0.83786-0.47266 1.53561 1.79217 0.75862 1.04022
  -2   2  -3   25.30   73.81   1-0.12754 0.23753 1.21063 1.46693-0.12754 0.15413
  -2   2  -3   31.93   74.63   1-0.20085 0.16430-1.51200-1.25584-0.20085 0.08052
  -2   2  -3   73.29   97.15   1-0.67294-0.30764 1.59573 1.85210 0.56095 0.84220
   2  -2   2248912.3 6750.16   1-0.47641-0.78077-0.71968-0.82440 0.47641 0.27258
  -2   2  -2236365.3 7087.77   1-0.97508-0.67041 0.67710 0.78140 0.97508 1.17841
  -2   2  -2258693.4 6056.58   1-0.69236-0.38780 1.64023 1.74531 1.01036 1.21407
  -2   2  -2274142.0 6656.17   1 0.12412 0.42856 1.45490 1.55973 0.12412 0.32778
  -2   2  -2267305.0 6393.67   1-0.38749-0.08298-1.61417-1.50953-0.38749-0.18407
   2  -2   2278680.8 7418.83   1-0.21296-0.51763 1.88267 1.77768 1.08374 0.88029
  -2   2  -2270872.4 6213.56   1-0.47067-0.16600 1.79381 1.89879 0.83814 1.04158
   2  -2   129233.85 1845.67   1-0.80009-1.04380-0.02484 0.02196 0.80009 0.67427
  -2   2  -127071.67 1781.81   1-0.96478-0.72108 0.60579 0.55900 0.96478 1.09061
   2  -2   126153.36 1579.53   1-0.27831-0.52223 1.57398 1.62033 1.35080 1.22493
  -2   2  -130716.38 1893.37   1-0.49291-0.24898 1.65458 1.60822 1.22213 1.34800
  -2   2  -127265.62 1823.58   1-0.65071-0.40682-1.64761-1.69435-0.65071-0.52523
   2  -2   128670.77 1998.41   1-0.45297-0.69686-1.63628-1.58955-0.45297-0.57846
   2  -2   127481.93 1508.61   1 0.05164-0.19239 1.83211 1.87850 1.24265 1.11699
  -2   2  -131112.42 1859.43   1-0.17881 0.06522 1.88369 1.83729 1.10922 1.23487
  -2   2   054525.08 2425.07   1-0.96967-0.78662 0.63801 0.43970 0.96967 1.01750
   2  -2   064672.89 2937.69   1-0.03846-0.22176 1.39802 1.59585 1.40592 1.35792
  -2   2   068385.07 3135.46   1-0.26367-0.08038 1.56563 1.36781 1.35664 1.40464
  -2   2   068450.92 3000.77   1-0.89587-0.71260-1.45242-1.65054-0.89587-0.84832
  -2   2   067736.12 3065.82   1 0.16137 0.34478 1.77233 1.57455 1.28302 1.33088
  -2   2   064126.27 2758.78   1-0.37983-0.19678-1.58141-1.77929-1.31608-1.26813
   2  -2  -188362.17 2974.29   1-0.89964-1.02203 0.29671 0.64653 0.89964 0.92982
  -2   2   190252.96 2945.92   1-0.97854-0.85632 0.70472 0.35476 0.97854 0.94822
  -2   2   195027.46 3326.60   1-0.99316-0.87053-1.04043-1.38994-0.99316-1.02355
   2  -2  -190323.42 3437.09   1-0.44934-0.57173-1.49812-1.14896-1.31177-1.28193
   2  -2  -273874.21 2743.49   1-0.90141-0.96315 0.30352 0.80486 0.90141 1.00960
  -2   2   264906.39 2726.24   1-0.98692-0.92552 0.78586 0.28448 0.98692 0.87871
  -2   2   266438.98 2884.16   1 0.11916 0.18118 1.23852 0.73776 1.39683 1.28910
  -2   2   267793.44 3225.96   1-0.47577-0.41406-0.74149-1.24205-1.23564-1.34326
  -2   2   263968.55 3165.00   1-0.96639-0.90446-0.61608-1.11698-0.96639-1.07476
   2  -2  -272465.82 2957.37   1-0.63343-0.69516-1.21054-0.71008-1.25629-1.14866
   2  -2  -345479.97 1953.54   1-0.89289-0.89397 0.27124 0.92409 0.89289 1.07909
  -2   2   341660.17 2257.58   1-0.67050-0.66946-0.36533-1.01721-1.03943-1.22484
   2  -2  -347917.11 2023.72   1-0.23130-0.23235-1.10377-0.45187-1.36840-1.18297
  -2   2   346682.72 2472.18   1-0.89402-0.89272-0.27545-0.92781-0.89402-1.08042
  -2   2   341368.69 2120.89   1-0.94538-0.94431-0.25182-0.90357-0.85220-1.03761
   2  -2  -347074.25 2146.40   1-0.73523-0.73630-0.99506-0.34332-1.18848-1.00307
   2  -2  -4 2188.04  485.03   1-0.87724-0.81767 0.21484 1.01920 0.87724 1.14144
  -2   2   4 2350.76  577.67   1-0.99487-1.05509 0.96087 0.15667 0.99487 0.73089
  -2   2   4 1853.95  445.62   1-0.80967-0.86930-0.01745-0.82068-0.81757-1.08079
   2  -2  -4 2400.78  579.43   1-0.29688-0.23725-1.01633-0.21311-1.34285-1.07964
  -2   2   4 2267.10  525.66   1-0.81339-0.87272-0.01296-0.81675-0.81339-1.07780
  -2   2   4 2067.99  705.82   1-0.98532-1.04490 0.08279-0.72026-0.66110-0.92430
   2  -2  -4 2403.46  563.14   1-0.78846-0.72887-0.85849-0.05544-1.13730-0.87410
   2  -2  -510805.30  980.46   1-0.85556-0.73533 0.14185 1.09772 0.85556 1.19775
  -2   2   512231.55 1162.45   1-0.99276-1.11380 1.04892 0.09330 0.99276 0.65089
  -2   2   5 9967.15 1237.28   1-0.90233-1.02263 0.28898-0.66558-0.59258-0.93360
   2  -2  -511499.29 1115.62   1-0.32747-0.20716-0.97324-0.01868-1.32855-0.98754
  -2   2   510798.07 1076.55   1-0.73508-0.85503 0.19475-0.76047-0.73508-1.07749
   2  -2  -5 9323.15  941.51   1-0.97707-0.85719-0.69267 0.26237-0.97707-0.63494
  -2   2   511426.49 1297.11   1-0.99485-1.11511 0.35324-0.60110-0.49012-0.83111
   2  -2  -511081.28 1249.73   1-0.81460-0.69435-0.78327 0.17106-1.10680-0.76582
   2  -2  -668358.82 2698.03   1-0.82815-0.64727 0.05639 1.16378 0.82815 1.24836
  -2   2   676698.87 3537.07   1-0.98584-1.16770 1.13534 0.02831 0.98584 0.56609
  -2   2   665028.17 2976.94   1-0.95910-1.14007 0.55497-0.55092-0.37392-0.79274
   2  -2  -662012.43 2794.20   1-0.33199-0.15100-0.96676 0.13914-1.32632-0.90750
  -2   2   667507.83 2575.51   1-0.66084-0.84143 0.36573-0.74095-0.66084-1.08126
  -2   2   668454.75 3360.61   1-0.98665-1.16756 0.57694-0.52869-0.33702-0.75579
   2  -2  -665861.78 2936.98   1-0.82483-0.64392-0.75205 0.35357-1.09370-0.67493
   2  -2  -7 2013.84  493.98   1-0.79492-0.55338-0.03923 1.21967 0.79492 1.29313
  -2   2   7 1783.43  536.38   1-0.98810-1.22976 0.78609-0.47114-0.16386-0.66048
  -2   2   7 1938.31  431.73   1-0.59013-0.83135 0.51162-0.74650-0.59013-1.08857
  -2   2   7 1872.68  588.95   1-0.96727-1.20828 0.76600-0.49150-0.19858-0.69531
   2  -2  -8 8780.62  941.22   1-0.75551-0.45332-0.14372 1.26670 0.75551 1.33173
  -2   2   8 6919.28 1051.24   1-0.99450-1.29683 0.98816-0.42039 0.03853-0.53588
  -2   2   8 7301.50  937.83   1-0.52196-0.82380 0.63984-0.76972-0.52196-1.09841
  -2   2   8 7807.35 1030.66   1-0.93971-1.24136 0.93141-0.47748-0.06977-0.64430
   2  -3   9 2682.49  830.80   1-0.49150-1.28163 1.65433 0.64222 1.22327 0.57331
   2  -3   9 2849.69  732.80   1-0.45618-1.24633 1.80303 0.79146 0.85473 0.20552
   2  -3   827096.31 2667.43   1-0.51169-1.24117 1.65750 0.79685 1.20660 0.63451
   2  -3   826287.46 2539.31   1-0.45803-1.18754 1.80190 0.94170 0.85263 0.28122
   2  -3   7 3759.29  836.15   1-0.51479-1.18364 1.65790 0.94872 1.20396 0.70973
  -2   3  -7 4282.82  764.54   1-0.99226-0.32340 1.04742 1.75557 0.10194 0.59566
   2  -3   7 3828.15  736.96   1-0.44569-1.11458 1.80937 1.10056 0.86651 0.37290
  -2   3  -7 4418.46  911.93   1-0.92689-0.25801 0.99176 1.70055-0.02076 0.47284
  -2   3  -6  163.88  226.55   1-0.41198 0.19625-0.82557-0.26809 0.41198 0.82890
  -2   3  -6  157.07  183.95   1-0.82153-0.21329 0.03670 0.59417 0.82153 1.23845
   2  -3   6  241.46  197.76   1-0.49807-1.10627 1.65547 1.09773 1.21796 0.80158
  -2   3  -6  218.36  175.80   1-0.96366-0.35545 1.25992 1.81766 0.34966 0.76603
  -2   3  -6  238.87  145.49   1-0.47242 0.13564 0.72646 1.28405-0.47242-0.05561
   2  -3   6  254.88  190.51   1-0.41390-1.02215 1.82679 1.26937 0.90106 0.48525
  -2   3  -6  265.60  165.56   1-0.86860-0.26035 1.20189 1.75929 0.15979 0.57560
   2  -3   555227.49 3282.01   1-0.45664-1.00422 1.64689 1.24061 1.25001 0.91150
  -2   3  -553017.27 3034.36   1-0.89636-0.34878 1.44806 1.85432 0.61043 0.94893
  -2   3  -554117.81 2959.25   1-0.35858 0.18885 0.90761 1.31376-0.35858-0.01978
   2  -3   549451.32 3426.07   1-0.35420-0.90181 1.85280 1.44676 0.96153 0.62351
  -2   3  -549718.28 2849.94   1-0.77900-0.23138 1.42009 1.82610 0.36839 0.70640
  -2   3  -455591.53 3864.41   1-0.66626-0.17935-0.35393-0.09950 0.66626 0.92715
   2  -3   465852.72 2764.86   1-0.38362-0.87056 1.62369 1.36889 1.29815 1.03752
  -2   3  -481482.59 2802.00   1-0.78245-0.29551 1.58945 1.84426 0.86895 1.12959
  -2   3  -477617.67 2888.57   1-0.20821 0.27858 1.11384 1.36853-0.20821 0.05257
  -2   3  -482534.48 3339.72   1-0.19938 0.28747-1.51098-1.25646-0.19938 0.06103
   2  -3   472899.96 2742.98   1-0.25388-0.74086 1.87835 1.62370 1.05119 0.79097
   2  -3   315800.90 1345.88   1 0.00590-0.42033-1.35090-1.45382-0.00590-0.18879
  -2   3  -320034.19 1433.39   1-0.74936-0.32311-0.15930-0.05639 0.74936 0.93224
   2  -3   322293.29 1536.21   1-0.27186-0.69816 1.57035 1.46699 1.35342 1.17065
  -2   3  -319323.81 1459.05   1-0.61943-0.19312 1.65825 1.76159 1.10099 1.28375
  -2   3  -323524.32 1595.35   1-0.00332 0.42285 1.34200 1.44525-0.00332 0.17945
  -2   3  -320852.45 1774.65   1-0.34830 0.07791-1.59732-1.49433-0.34830-0.16584
  -2   3  -322667.87 1503.54   1-0.44664-0.02029 1.80879 1.91205 0.86545 1.04787
   2  -3   2  593.93  409.60   1-0.43675-0.80234-0.78579-0.73718 0.43675 0.33187
  -2   3  -2  744.29  332.14   1-0.81310-0.44751 0.01211-0.03650 0.81310 0.91798
  -2   3  -2  881.93  360.61   1-0.41843-0.05276 1.63597 1.58787 1.27646 1.38137
  -2   3  -2  742.84  382.27   1-0.56519-0.19960-1.65429-1.70270-0.56519-0.46066
   2  -3   2  587.34  314.78   1-0.27079-0.63638-1.55663-1.50821-0.27079-0.37531
  -2   3  -2  788.60  298.94   1-0.18394 0.18177 1.88368 1.83554 1.10548 1.21010
   2  -3   153147.07 2827.76   1-0.64356-0.94849-0.40274-0.20263 0.64356 0.61668
  -2   3  -143940.49 2145.63   1-0.86349-0.55856 0.16794-0.03218 0.86349 0.89037
   2  -3   148781.56 2536.11   1 0.06802-0.23700 1.29403 1.49360 1.40367 1.37663
  -2   3  -151744.91 2823.50   1-0.20691 0.09811 1.53029 1.33072 1.37619 1.40323
  -2   3  -143688.37 2618.53   1-0.80851-0.50354-1.56670-1.76649-0.80851-0.78192
   2  -3   147840.75 2614.15   1-0.58466-0.88962-1.65451-1.45470-0.58466-0.61124
  -2   3  -152003.08 2754.63   1 0.11037 0.41545 1.80296 1.60345 1.26613 1.29296
  -2   3  -146023.80 2725.87   1-0.37880-0.07407-1.58255-1.78235-1.31608-1.28918
  -2   3   012708.73 1091.12   1-0.90373-0.65945 0.31254-0.03910 0.90373 0.85260
  -2   3   014667.62 1346.59   1-0.01692 0.22747 1.37824 1.02721 1.40676 1.35593
  -2   3   013081.17 1302.99   1-0.26774-0.02360-1.05600-1.40718-1.35505-1.40594
  -2   3   013031.77 1338.94   1-0.96627-0.72193-1.25582-1.60698-0.96627-1.01761
   2  -3   012401.07 1335.58   1-0.83404-1.07837-1.54089-1.18972-0.83404-0.78269
  -2   3   013781.26 1369.41   1-0.61722-0.37315-1.24051-1.59158-1.26424-1.31510
   2  -3   014122.64 1250.13   1-0.37120-0.61527-1.59092-1.23986-1.31607-1.26521
   2  -3  -1 1230.40  301.20   1-0.77807-0.96170-0.08496 0.41819 0.77807 0.90720
  -2   3   1 1223.44  341.35   1-0.93558-0.75196 0.44840-0.05474 0.93558 0.80645
  -2   3   1 1155.62  361.93   1-0.99096-0.80725-0.84031-1.34285-0.99096-1.12024
   2  -3  -1 1228.48  401.08   1-0.95528-1.13899-1.30067-0.79812-0.95528-0.82599
  -2   3   1 1281.79  378.21   1-0.79289-0.60948-0.84616-1.34853-1.13241-1.26107
   2  -3  -1 1402.03  437.20   1-0.55715-0.74056-1.34302-0.84066-1.28805-1.15939
   2  -3  -2 8156.63  892.92   1-0.79296-0.91593-0.04464 0.61002 0.79296 1.00010
  -2   3   2 8055.33 1171.45   1-0.96010-0.83713 0.57703-0.07762 0.96010 0.75296
  -2   3   2 7914.00  992.55   1-0.61794-0.49515-0.47679-1.13067-1.10265-1.30915
   2  -3  -2 8827.92  890.30   1-0.23549-0.35830-1.09838-0.44452-1.36697-1.16048
  -2   3   2 8314.91 1047.68   1-0.93893-0.81590-0.46436-1.11829-0.93893-1.14620
   2  -3  -2 8419.03  971.46   1-0.99110-1.11417-1.07666-0.42273-0.99110-0.78388
   2  -3  -2 9005.67 1051.11   1-0.67291-0.79566-1.13293-0.47928-1.23391-1.02748
   2  -3  -341574.82 2121.55   1-0.79244-0.85476-0.04606 0.76009 0.79244 1.07757
  -2   3   342246.88 2189.40   1-0.74671-0.68460-0.18624-0.99143-0.92972-1.21402
   2  -3  -341533.09 2704.37   1-0.30070-0.36281-1.01104-0.20585-1.34116-1.05686
  -2   3   342482.03 2177.27   1-0.86255-0.80014-0.16479-0.97017-0.86255-1.14783
   2  -3  -341869.32 2374.33   1-0.99433-1.05678-0.91844-0.11313-0.99433-0.70918
   2  -3  -343644.84 2345.78   1-0.74026-0.80235-0.98297-0.17802-1.18418-0.89995
   2  -3  -4 5113.99  711.17   1-0.78148-0.78314-0.07584 0.88183 0.78148 1.14462
  -2   3   4 5029.32  786.24   1-0.98943-0.98860 0.81750-0.14011 0.98943 0.62643
  -2   3   4 4584.86  770.65   1-0.84400-0.84256 0.08573-0.87079-0.74490-1.10699
   2  -3  -4 5150.83  734.44   1-0.33565-0.33709-0.96147-0.00492-1.32447-0.96237
  -2   3   4 4495.23  690.08   1-0.78299-0.78121 0.07179-0.88504-0.78299-1.14628
   2  -3  -4 4757.55  659.11   1-0.98963-0.99145-0.82026 0.13644-0.98963-0.62654
  -2   3   4 4939.16  827.52   1-0.98869-0.98726 0.13385-0.82238-0.62996-0.99197
   2  -3  -4 4866.53  787.85   1-0.77756-0.77899-0.88814 0.06811-1.14889-0.78687
   2  -3  -5 2363.75  471.31   1-0.76238-0.70339-0.12611 0.98307 0.76238 1.20352
  -2   3   5 2499.75  594.13   1-0.99456-1.05454 0.92901-0.18002 0.99456 0.55367
  -2   3   5 2115.32  522.13   1-0.91378-0.97301 0.33497-0.77289-0.55639-0.99628
   2  -3  -5 2193.84  471.79   1-0.34727-0.28804-0.94455 0.16333-1.31847-0.87857
  -2   3   5 2263.10  506.46   1-0.70612-0.76497 0.26394-0.84431-0.70612-1.14742
  -2   3   5 2277.34  595.39   1-0.99475-1.05399 0.37081-0.73672-0.47849-0.91829
   2  -3  -6  277.59  165.90   1-0.73619-0.61653-0.19203 1.06865 0.73619 1.25533
  -2   3   6  270.26  204.74   1-0.96019-1.08010 0.56151-0.69769-0.36824-0.88594
  -2   3   6  290.76  232.06   1-0.63273-0.75221 0.42547-0.83424-0.63273-1.15205
  -2   3   6  287.16  214.57   1-0.98674-1.10662 0.57570-0.68312-0.33790-0.85549
   2  -3  -715972.22 1344.64   1-0.70323-0.52292-0.27067 1.14153 0.70323 1.30037
  -2   3   712984.70 1410.60   1-0.98652-1.16710 0.76711-0.64342-0.18190-0.77740
  -2   3   713924.25 1566.66   1-0.56222-0.74233 0.56547-0.84568-0.56222-1.15954
  -2   3   714210.96 1367.71   1-0.96873-1.14871 0.75500-0.65562-0.20688-0.80244
   2  -3  -8 6222.44  959.63   1-0.66340-0.42244-0.36016 1.20355 0.66340 1.33855
  -2   3   8 5347.12 1056.50   1-0.99487-1.23613 0.95385-0.60803 0.00272-0.67058
  -2   3   8 5590.07  834.27   1-0.49370-0.73444 0.68988-0.87271-0.49370-1.16904
  -2   3   8 5756.09  938.69   1-0.94280-1.18341 0.91567-0.64634-0.08236-0.75572
   2  -4  10 4277.10  873.02   1 0.07404-0.83763 1.41318 0.40287 0.07404-0.55591
   2  -4  10 4182.97  852.71   1-0.34213-1.25397 1.85704 0.84719 0.97308 0.34490
   2  -4   9 1223.25  618.84   1-0.31827-1.16949 1.59497 0.73607 1.33302 0.78188
   2  -4   9 1728.41  538.35   1 0.06822-0.78283 1.40812 0.54923 0.06822-0.48373
   2  -4   9 1817.16  517.65   1-0.34082-1.19202 1.85749 0.99903 0.97433 0.42395
   2  -4   872019.10 5570.79   1-0.32321-1.11380 1.59739 0.88994 1.33064 0.85737
   2  -4   876211.25 4769.06   1 0.07414-0.71627 1.41326 0.70585 0.07414-0.39979
   2  -4   866819.85 4453.64   1-0.32429-1.11486 1.86272 1.15564 0.98977 0.51718
   2  -4   7 7131.60 1444.29   1-0.30657-1.03653 1.58909 1.03311 1.33850 0.94309
  -2   4  -7 7242.06 1080.25   1-0.95201-0.22205 1.30579 1.86178 0.40854 0.80395
   2  -4   7 8553.04 1210.46   1 0.09604-0.63375 1.43194 0.87595 0.09604-0.29988
   2  -4   7 9272.80 1112.21   1-0.28798-1.01791 1.87209 1.31642 1.02231 0.62753
  -2   4  -7 8775.64 1207.23   1-0.86240-0.13247 1.22014 1.77582 0.17630 0.57108
  -2   4  -612312.83 2098.20   1-0.43279 0.23665-0.79224-0.38809 0.43279 0.75074
  -2   4  -611800.77 1378.68   1-0.93228-0.26222 1.37226 1.77546 0.93228 1.24913
   2  -4   618121.51 1849.27   1-0.26587-0.93519 1.56692 1.16239 1.35580 1.03824
  -2   4  -616175.49 1709.51   1-0.87166-0.20234 1.49007 1.89458 0.67821 0.99575
   2  -4   617925.85 1956.28   1 0.14043-0.52872 1.46771 1.06319 0.14043-0.17748
  -2   4  -618631.36 1574.07   1-0.41431 0.25485 0.82188 1.22642-0.41431-0.09639
   2  -4   615059.25 1364.34   1-0.22525-0.89454 1.88172 1.47742 1.07420 0.75721
  -2   4  -618955.41 1591.72   1-0.76990-0.10060 1.43797 1.84225 0.38676 0.70374
  -2   4  -514263.62 1507.31   1-0.51163 0.09714-0.65834-0.40571 0.51163 0.75158
  -2   4  -510121.49 1246.32   1-0.64093-0.03169 1.64942 1.90119 0.64093 0.87989
   2  -4   515693.00 1325.10   1-0.19814-0.80682 1.52442 1.27134 1.37878 1.13910
  -2   4  -512468.80 1569.21   1-0.74561-0.13693 1.61478 1.86784 0.93149 1.17117
  -2   4  -515553.11 1304.99   1-0.28701 0.32152 1.01013 1.26324-0.28701-0.04710
  -2   4  -516525.60 1432.99   1-0.21682 0.39172-1.52281-1.26995-0.21682 0.02263
   2  -4   514337.33 1503.32   1-0.12765-0.73632 1.88095 1.62804 1.14456 0.90538
  -2   4  -516047.33 1671.48   1-0.63535-0.02669 1.64393 1.89684 0.61995 0.85914
  -2   4  -4101094.2 4412.82   1-0.59708-0.04895-0.49791-0.39681 0.59708 0.75902
   2  -4   4102879.5 3700.75   1-0.10162-0.64966 1.45230 1.35069 1.39961 1.23780
  -2   4  -482735.42 4080.19   1-0.57821-0.03017 1.66140 1.76299 1.14494 1.30675
  -2   4  -499832.87 3536.65   1-0.11888 0.42901 1.22049 1.32213-0.11888 0.04300
  -2   4  -4103650.8 3737.59   1-0.33963 0.20828-1.59325-1.49194-0.33963-0.17814
   2  -4   4103928.5 3913.96   1 0.01248-0.53554 1.84792 1.74640 1.22461 1.06323
  -2   4  -4105749.2 3610.45   1-0.44875 0.09927 1.80754 1.90907 0.86309 1.02449
   2  -4   3 3962.46  691.89   1-0.14815-0.63562-1.18678-1.13637 0.14815 0.06421
  -2   4  -3 4402.23  702.54   1-0.67805-0.19058-0.32789-0.37831 0.67805 0.76199
   2  -4   3 4611.81  732.44   1 0.02182-0.46558 1.34107 1.39092 1.40663 1.32268
  -2   4  -3 5192.24  718.98   1-0.38523 0.10216 1.62431 1.57446 1.29720 1.38115
  -2   4  -3 4741.28  815.99   1 0.10515 0.59243 1.43950 1.38972 0.10515 0.18904
  -2   4  -3 4473.58  812.48   1-0.51864-0.03135-1.65012-1.70020-0.51864-0.43508
  -2   4  -3 4898.64  647.83   1-0.21170 0.27569 1.88274 1.83288 1.08471 1.16830
  -2   4  -3 4721.93  661.39   1-0.19554 0.29154-1.74898-1.79965-1.29247-1.20897
   2  -4   2  143.91  139.03   1-0.39414-0.82096-0.85352-0.65163 0.39414 0.38820
  -2   4  -2  148.49  151.52   1-0.74975-0.32293-0.15831-0.36022 0.74975 0.75569
  -2   4  -2  179.69  171.47   1-0.19109 0.23568 1.51959 1.31829 1.38076 1.38685
  -2   4  -2  140.87  121.37   1-0.73747-0.31081-1.61696-1.81841-0.73747-0.73185
   2  -4   2  111.97  146.63   1-0.38474-0.81140-1.61308-1.41162-0.38474-0.39036
  -2   4  -2  190.45  144.99   1 0.04939 0.47616 1.83309 1.63184 1.24167 1.24746
  -2   4  -2  135.84  164.99   1-0.40106 0.02534-1.55725-1.75894-1.31561-1.30972
   2  -4   1 8769.92  991.01   1-0.54039-0.90656-0.60625-0.25282 0.54039 0.61246
  -2   4  -1 8736.48  976.31   1-0.81100-0.44483 0.00606-0.34737 0.81100 0.73893
  -2   4  -110585.35 1108.35   1-0.01889 0.34724 1.38008 1.02730 1.40672 1.33492
  -2   4  -1 9432.00 1129.47   1-0.31626 0.04962-0.98921-1.34237-1.33398-1.40594
  -2   4  -1 9287.86  948.16   1-0.92116-0.55513-1.40005-1.75288-0.92116-0.99347
   2  -4   1 9411.41 1173.00   1-0.66629-1.03233-1.64409-1.29126-0.66629-0.59398
  -2   4  -1 9237.21 1059.20   1-0.59717-0.23142-1.27617-1.62916-1.27313-1.34503
  -2   4   0112221.2 3536.17   1-0.86213-0.55663 0.16342-0.34151 0.86213 0.71207
  -2   4   0117547.4 3504.69   1 0.11825 0.42375 1.23954 0.73529 1.39699 1.24733
  -2   4   0115772.9 3531.05   1-0.46248-0.15727-0.76393-1.26844-1.24570-1.39547
  -2   4   0118732.1 4271.95   1-0.99368-0.68827-1.02801-1.53222-0.99368-1.14392
   2  -4   0117067.2 4071.45   1-0.86340-1.16881-1.50431-1.00009-0.86340-0.71315
  -2   4   0121838.5 4153.49   1-0.75476-0.44968-0.94724-1.45150-1.17121-1.32089
   2  -4   0121862.4 3753.12   1-0.47529-0.78037-1.46384-0.95958-1.30807-1.15839
   2  -4  -1  158.11  122.50   1-0.66738-0.91224-0.35146 0.30499 0.66738 0.89546
  -2   4   1  187.96  127.42   1-0.90395-0.65910 0.31340-0.34305 0.90395 0.67588
   2  -4  -1  178.62  164.12   1-0.21834-0.46290-1.12030-0.46447-1.37267-1.14510
  -2   4   1  344.59  208.30   1-0.96962-0.72485-0.63763-1.29317-0.96962-1.19778
   2  -4  -1  150.51  169.94   1-0.95682-1.20159-1.29491-0.63932-0.95682-0.72864
  -2   4   1  150.90  147.56   1-0.86527-0.62084-0.61663-1.27218-1.03399-1.26145
   2  -4  -1  216.95  159.64   1-0.60223-0.84666-1.26730-0.61174-1.27098-1.04350
   2  -4  -2  814.91  272.22   1-0.68762-0.87181-0.30642 0.50153 0.68762 0.99369
  -2   4   2  730.10  340.89   1-0.70759-0.52373-0.28106-1.08822-0.98902-1.29439
   2  -4  -2  840.05  317.78   1-0.28517-0.46903-1.03243-0.22527-1.34792-1.04255
  -2   4   2  828.64  310.64   1-0.90229-0.71815-0.30693-1.11390-0.90229-1.20845
   2  -4  -2  812.15  324.81   1-0.98836-1.17251-1.11067-0.30369-0.98836-0.68224
  -2   4   2  741.19  399.69   1-0.93498-0.75121-0.31145-1.11830-0.88387-1.18912
   2  -4  -2  834.05  283.49   1-0.68295-0.86672-1.11208-0.30523-1.22749-0.92223
   2  -4  -316888.20 1338.31   1-0.69179-0.81534-0.29694 0.66253 0.69179 1.07588
  -2   4   315132.61 1424.40   1-0.96261-0.83907 0.59223-0.36724 0.96261 0.57853
  -2   4   315085.15 1740.10   1-0.80009-0.67690-0.04466-1.00317-0.83621-1.21939
   2  -4  -316282.19 1481.57   1-0.32501-0.44820-0.97676-0.01827-1.32976-0.94660
  -2   4   315365.50 1386.80   1-0.82352-0.70001-0.04259-1.00101-0.82352-1.20770
   2  -4  -315241.85 1305.37   1-0.99480-1.11833-0.97932-0.02096-0.99480-0.61075
   2  -4  -315454.04 1341.68   1-0.73188-0.85499-1.00301-0.04486-1.19128-0.80823
   2  -4  -471935.40 2961.01   1-0.68429-0.74718-0.31392 0.79706 0.68429 1.14637
  -2   4   463164.73 2846.81   1-0.87281-0.81029 0.18072-0.92911-0.67524-1.13621
   2  -4  -467055.07 2806.07   1-0.34334-0.40586-0.95030 0.15955-1.32053-0.85955
  -2   4   456610.40 3591.39   1-0.74483-0.68195 0.17064-0.93923-0.74483-1.20702
   2  -4  -463221.67 2617.18   1-0.99367-1.05657-0.89606 0.21369-0.99367-0.53169
  -2   4   463192.46 3121.57   1-0.99194-0.92949 0.19894-0.91050-0.58950-1.05034
   2  -4  -5 2004.42  457.21   1-0.66749-0.66972-0.35124 0.91126 0.66749 1.20757
  -2   4   5 1657.51  488.85   1-0.92727-0.92543 0.39300-0.86817-0.50978-1.04856
  -2   4   5 1697.62  428.83   1-0.66912-0.66687 0.34766-0.91364-0.66912-1.20931
  -2   4   5 1740.93  453.51   1-0.99420-0.99241 0.41017-0.85057-0.45220-0.99082
   2  -4  -610878.53 1190.18   1-0.64262-0.58419-0.40474 1.00926 0.64262 1.26071
  -2   4   6 9448.72 1077.97   1-0.96506-1.02389 0.59170-0.82082-0.34187-0.95845
  -2   4   6 9698.48 1049.80   1-0.59645-0.65482 0.49917-0.91358-0.59645-1.21466
  -2   4   6 9968.22 1465.70   1-0.98504-1.04392 0.59852-0.81351-0.32166-0.93807
   2  -4  -7 2237.31  543.83   1-0.61019-0.49111-0.47168 1.09384 0.61019 1.30629
  -2   4   7 2012.65  628.28   1-0.98737-1.10688 0.77710-0.78674-0.17242-0.86680
  -2   4   7 2008.88  601.54   1-0.52611-0.64512 0.63234-0.93185-0.52611-1.22233
  -2   4   7 2180.59  550.33   1-0.96705-1.08598 0.76759-0.79615-0.19737-0.89177
   2  -5  1018013.68 1708.58   1 0.11785-0.85492 1.44986 0.59258 0.11785-0.41321
   2  -5  1017477.48 2107.91   1-0.21484-1.18771 1.88253 1.02581 1.08229 0.55294
   2  -5   9  605.41  365.94   1-0.11745-1.02979 1.46503 0.75934 1.39713 0.94481
   2  -5   9  809.08  430.76   1 0.12271-0.78944 1.45376 0.74794 0.12271-0.33034
   2  -5   9  682.80  304.33   1-0.19602-1.10826 1.88347 1.17812 1.09658 0.64502
   2  -5   817766.68 2042.29   1-0.10871-0.96040 1.45804 0.90381 1.39854 1.02409
   2  -5   819627.04 1942.93   1 0.14211-0.70941 1.46902 0.91462 0.14211-0.23293
   2  -5   816833.52 1852.63   1-0.15791-1.00952 1.88319 1.32923 1.12407 0.75031
  -2   5  -820608.80 2030.07   1-0.86481-0.01319 1.21311 1.76708 0.16994 0.54369
  -2   5  -7   39.15   85.08   1-0.88813-0.09620 1.46611 1.86733 0.88813 1.18385
   2  -5   7   81.34  134.64   1-0.07736-0.86842 1.43210 1.02933 1.40270 1.10611
  -2   5  -7   45.43  110.43   1-0.85831-0.06725 1.50948 1.91226 0.71144 1.00803
   2  -5   7   46.25  115.79   1-0.09583-0.88681 1.87672 1.47415 1.16489 0.86893
  -2   5  -7   62.45  104.17   1-0.77310 0.01787 1.43174 1.83430 0.38034 0.67629
  -2   5  -6  376.75  220.80   1-0.47203 0.25863-0.72714-0.47632 0.47203 0.69104
  -2   5  -6  323.54  211.56   1-0.65266 0.07845 1.64722 1.89701 0.65266 0.87048
   2  -5   6  345.91  232.84   1-0.02338-0.75380 1.38423 1.13294 1.40657 1.18786
  -2   5  -6  274.44  186.52   1-0.72764 0.00277 1.62470 1.87604 0.95948 1.17821
  -2   5  -6  398.56  205.72   1-0.36396 0.36630 0.89958 1.15110-0.36396-0.14493
  -2   5  -6  515.18  271.42   1-0.24774 0.48249-1.54272-1.29169-0.24774-0.02928
   2  -5   6  416.00  208.88   1-0.00477-0.73512 1.85399 1.60280 1.21607 0.99791
  -2   5  -6  399.30  226.74   1-0.64315 0.08719 1.63443 1.88560 0.60804 0.82620
  -2   5  -512207.54 1504.59   1-0.53200 0.13801-0.62164-0.52233 0.53200 0.67300
  -2   5  -511707.68 1137.57   1-0.34693 0.32336 1.59669 1.69505 0.34693 0.48687
   2  -5   512883.42 1425.05   1 0.05233-0.61745 1.31034 1.21049 1.40502 1.26417
  -2   5  -515179.59 1399.24   1-0.56270 0.10707 1.66143 1.76128 1.16029 1.30114
  -2   5  -512841.25 1371.19   1-0.22527 0.44436 1.09217 1.19225-0.22527-0.08425
  -2   5  -513528.69 1389.97   1-0.35169 0.31792-1.59889-1.49923-0.35169-0.21116
   2  -5   511051.05 1423.29   1 0.11829-0.55142 1.79853 1.69876 1.26897 1.12862
  -2   5  -512818.52 1203.40   1-0.46884 0.20086 1.79501 1.89479 0.84026 0.98061
   2  -5   410499.43 1330.09   1 0.05179-0.55756-1.39355-1.34133-0.05179-0.11479
  -2   5  -410915.48 1006.16   1-0.59957 0.00978-0.49296-0.54517 0.59957 0.66257
   2  -5   4 9012.63 1105.83   1 0.14691-0.46223 1.20686 1.25846 1.39154 1.32854
  -2   5  -4 9186.56 1452.27   1-0.38016 0.22898 1.62235 1.57075 1.30019 1.36318
  -2   5  -411136.90 1292.05   1-0.04336 0.56565 1.30196 1.25060-0.04336 0.01964
  -2   5  -411710.19 1279.72   1-0.50185 0.10713-1.64743-1.69918-0.50185-0.43926
  -2   5  -412638.70 1162.25   1-0.25369 0.35538 1.87836 1.82676 1.05133 1.11389
  -2   5  -412482.18 1016.05   1-0.27042 0.33831-1.68960-1.74193-1.30780-1.24517
   2  -5   3 2757.32  604.29   1-0.18342-0.73212-1.14457-0.94086 0.18342 0.19842
  -2   5  -3 2615.18  561.56   1-0.66797-0.11927-0.35018-0.55389 0.66797 0.65297
  -2   5  -3 2846.11  623.33   1-0.20046 0.34805 1.52598 1.32292 1.37811 1.36324
  -2   5  -3 2793.52  552.92   1-0.25563 0.29267-1.07211-1.27589-1.35973-1.37496
  -2   5  -3 2754.52  516.30   1-0.69205-0.14369-1.63648-1.83960-0.69205-0.70740
   2  -5   3 3035.03  754.09   1-0.19102-0.73945-1.50515-1.30220-0.19102-0.17573
  -2   5  -3 2648.14  582.12   1-0.01807 0.53037 1.85826 1.65527 1.20922 1.19398
  -2   5  -3 2991.47  622.98   1-0.43740 0.11068-1.51329-1.71691-1.31308-1.32824
   2  -5   265000.94 2982.94   1-0.35002-0.83807-0.92032-0.56508 0.35002 0.44303
  -2   5  -260810.32 3080.58   1-0.73280-0.24475-0.20033-0.55555 0.73280 0.63980
  -2   5  -268367.27 3004.74   1-0.04088 0.44699 1.40019 1.04568 1.40577 1.31304
  -2   5  -257838.62 2739.11   1-0.37021 0.11742-0.91047-1.26560-1.30593-1.39897
  -2   5  -262020.55 2581.54   1-0.87618-0.38845-1.48554-1.84005-0.87618-0.96946
   2  -5   259361.73 3249.57   1-0.46299-0.95073-1.63894-1.28445-0.46299-0.36972
  -2   5  -264787.01 2775.76   1-0.59863-0.11121-1.27361-1.62851-1.27251-1.36545
   2  -5   258545.11 2556.10   1-0.20577-0.69325-1.74153-1.38644-1.29500-1.20196
  -2   5  -1 3386.93  520.94   1-0.79160-0.36421-0.04837-0.55511 0.79160 0.62059
  -2   5  -1 3769.41  601.31   1 0.08897 0.51622 1.27173 0.76574 1.40132 1.23072
  -2   5  -1 3605.70  602.08   1-0.48408-0.05712-0.72728-1.23375-1.22917-1.40003
  -2   5  -1 3794.25  635.10   1-0.98143-0.55432-1.17066-1.67654-0.98143-1.15263
   2  -5   1 3657.11  701.43   1-0.70970-1.13680-1.62988-1.12400-0.70970-0.53849
  -2   5  -1 3481.42  747.21   1-0.73547-0.30870-0.99448-1.50066-1.18827-1.35899
   2  -5   0 5468.35  747.76   1-0.52971-0.89645-0.62581 0.03244 0.52971 0.77872
  -2   5   0 4606.06  878.82   1-0.84320-0.47646 0.10248-0.55576 0.84320 0.59419
  -2   5   0 4935.11  784.47   1-0.59126-0.22498-0.53026-1.18806-1.13153-1.38018
   2  -5   0 5284.98  741.95   1-0.18744-0.55375-1.15865-0.50086-1.38177-1.13313
  -2   5   0 4945.53  753.96   1-0.98696-0.62048-0.78629-1.44354-0.98696-1.23610
   2  -5   0 4929.87  721.73   1-0.87164-1.23811-1.49243-0.83516-0.87164-0.62249
  -2   5   0 5425.80  842.54   1-0.83950-0.47339-0.70530-1.36278-1.07360-1.32211
   2  -5   0 4588.92  700.92   1-0.52459-0.89069-1.39352-0.73605-1.29761-1.04911
   2  -5  -1146007.2 4317.32   1-0.57049-0.87658-0.54972 0.26005 0.57049 0.89751
  -2   5   1118712.7 4781.57   1-0.88719-0.58111 0.25029-0.55947 0.88719 0.56018
   2  -5  -1127722.0 5294.37   1-0.25666-0.56228-1.07074-0.26160-1.35933-1.03288
  -2   5   1127474.5 5200.57   1-0.93246-0.62659-0.43387-1.24244-0.93246-1.25951
   2  -5  -1124765.6 5232.02   1-0.95107-1.25692-1.31561-0.50697-0.95107-0.62399
  -2   5   1136663.5 4558.67   1-0.91182-0.60638-0.42733-1.23609-0.94328-1.26956
   2  -5  -1127049.6 5464.61   1-0.61731-0.92276-1.24033-0.43157-1.26419-0.93790
   2  -5  -271210.42 3603.15   1-0.59099-0.83642-0.50993 0.45133 0.59099 0.99601
  -2   5   266641.35 3085.87   1-0.77135-0.52642-0.12284-1.08330-0.88858-1.29282
   2  -5  -273037.61 2808.89   1-0.30139-0.54633-1.01008-0.04961-1.34085-0.93660
  -2   5   266404.21 2629.04   1-0.85635-0.61111-0.14442-1.10443-0.85635-1.26141
   2  -5  -270900.00 2942.48   1-0.98248-1.22771-1.16291-0.20289-0.98248-0.57747
  -2   5   270405.67 2914.77   1-0.95793-0.71314-0.17069-1.13075-0.80794-1.21202
   2  -5  -272952.82 2637.26   1-0.67780-0.92259-1.12283-0.16278-1.23082-0.82675
   2  -5  -3  542.58  281.17   1-0.59654-0.78131-0.49898 0.61380 0.59654 1.07957
  -2   5   3  572.98  254.50   1-0.84137-0.65711 0.07749-1.03431-0.75082-1.23286
  -2   5   3  579.71  266.66   1-0.77655-0.59194 0.08901-1.02244-0.77655-1.25961
   2  -5  -3  529.19  262.20   1-0.99258-1.17718-1.05223 0.05918-0.99258-0.50963
   2  -5  -435123.70 2069.30   1-0.59045-0.71457-0.51100 0.75329 0.59045 1.15147
  -2   5   431570.64 2211.49   1-0.89782-0.77423 0.27157-0.99157-0.60611-1.16596
  -2   5   433227.87 2163.69   1-0.69878-0.57480 0.28095-0.98196-0.69878-1.25987
   2  -5  -5 9792.41 1087.16   1-0.57471-0.63818-0.54161 0.87421 0.57471 1.21375
  -2   5   5 8593.64 1132.51   1-0.94109-0.87817 0.45795-0.95652-0.45634-1.09399
  -2   5   5 8776.91 1105.92   1-0.62409-0.56073 0.44337-0.97098-0.62409-1.26318
  -2   5   5 8643.92 1011.34   1-0.99270-0.92989 0.46369-0.95024-0.41591-1.05334
   2  -5  -628580.56 2091.56   1-0.55043-0.55323-0.58763 0.97969 0.55043 1.26747
  -2   5   624537.42 1780.68   1-0.97158-0.96934 0.63593-0.92988-0.30263-1.01809
  -2   5   625754.32 1916.26   1-0.55204-0.54931 0.58464-0.98115-0.55204-1.26914
  -2   5   626726.48 1815.70   1-0.98172-0.97957 0.63780-0.92743-0.29341-1.00863
   2  -6  10 2078.24  761.89   1-0.06261-1.09653 1.87022 1.16661 1.18474 0.75422
   2  -6   9  503.19  420.61   1 0.08619-0.88723 1.27472 0.72222 1.40167 1.04817
  -2   6  -9 1130.35  428.71   1-0.19349 0.77966-1.50688-0.95447-0.19349 0.15992
   2  -6   9  649.61  373.53   1-0.02553-0.99882 1.86052 1.30831 1.20529 0.85258
   2  -6   8  419.51  409.59   1 0.10183-0.81096 1.25775 0.85671 1.39958 1.12395
  -2   6  -8  778.52  359.27   1-0.22910 0.68346-1.53089-1.13016-0.22910 0.04632
   2  -6   8  546.66  370.80   1 0.03271-0.87994 1.84010 1.43927 1.23416 0.95924
  -2   6  -714423.67 1388.05   1-0.68038 0.17260 1.64023 1.88803 0.68038 0.87708
   2  -6   714142.91 2028.86   1 0.13762-0.71453 1.21758 0.96801 1.39344 1.19568
  -2   6  -714397.86 1603.77   1-0.72616 0.12599 1.62547 1.87505 0.96173 1.15950
  -2   6  -714983.84 1374.02   1-0.43909 0.41290 0.78197 1.03190-0.43909-0.24094
  -2   6  -716550.38 1334.38   1-0.28812 0.56382-1.56654-1.31717-0.28812-0.09062
   2  -6   714469.54 1501.10   1 0.11462-0.73740 1.80061 1.55116 1.26767 1.07054
  -2   6  -716283.17 1624.44   1-0.66338 0.18864 1.60859 1.85804 0.57635 0.77348
  -2   6  -6  982.18  314.79   1-0.51289 0.27900-0.65609-0.55857 0.51289 0.63296
  -2   6  -6 1095.28  377.92   1-0.44021 0.35196 1.63258 1.72897 0.44021 0.55901
  -2   6  -6 1179.00  431.48   1-0.56676 0.22476 1.66149 1.75959 1.15634 1.27623
  -2   6  -6 1208.35  301.98   1-0.19205 0.59935-1.15301-1.05607-1.38050-1.26117
  -2   6  -6 1231.92  397.66   1-0.32442 0.46695 0.95758 1.05606-0.32442-0.20428
  -2   6  -6 1266.26  427.67   1-0.37833 0.41298-1.61046-1.51250-0.37833-0.25877
  -2   6  -6 1260.93  371.50   1-0.50166 0.28972 1.77215 1.87019 0.80138 0.92070
  -2   6  -6 1452.13  367.87   1-0.22092 0.57015-1.73012-1.63306-1.29850-1.17911
  -2   6  -564890.01 3004.50   1-0.56308 0.16816-0.56383-0.61783 0.56308 0.60514
  -2   6  -576794.53 2996.09   1-0.19779 0.53350 1.50988 1.45468 0.19779 0.23857
  -2   6  -588405.15 3641.30   1-0.39446 0.33642 1.62776 1.57441 1.29165 1.33368
  -2   6  -578188.72 3139.15   1-0.26084 0.46988-1.06521-1.11963-1.35775-1.31626
  -2   6  -582620.20 3301.37   1-0.17718 0.55355 1.15218 1.09921-0.17718-0.13506
  -2   6  -563869.70 3839.48   1-0.50665 0.22403-1.64827-1.70166-0.50665-0.46502
  -2   6  -584574.32 4081.51   1-0.30530 0.42545 1.86799 1.81465 1.00703 1.04855
  -2   6  -583046.40 3192.83   1-0.34674 0.38367-1.61697-1.67119-1.31544-1.27383
   2  -6   4 1652.29  499.85   1-0.01380-0.68439-1.33172-1.12622 0.01380 0.04974
  -2   6  -4 1545.55  433.05   1-0.61982 0.05076-0.45212-0.65763 0.61982 0.58388
  -2   6  -4 1658.25  449.09   1-0.22636 0.44389 1.54295 1.33814 1.37006 1.33422
  -2   6  -4 1660.46  421.13   1-0.34069 0.32935-0.95416-1.15991-1.32190-1.35821
  -2   6  -4 1694.79  488.63   1 0.01374 0.68385 1.35840 1.15400 0.01374-0.02214
  -2   6  -4 1532.55  415.77   1-0.67093-0.00086-1.64289-1.84768-0.67093-0.70723
  -2   6  -4 1703.51  478.76   1-0.09016 0.57996 1.87575 1.67102 1.16837 1.13209
  -2   6  -4 1626.56  409.62   1-0.48266 0.18709-1.45377-1.65928-1.30680-1.34298
   2  -6   340974.36 2542.42   1-0.18119-0.79113-1.14730-0.79026 0.18119 0.29514
  -2   6  -339655.69 2355.66   1-0.67862-0.06869-0.32662-0.68363 0.67862 0.56468
  -2   6  -344825.06 2598.18   1-0.07602 0.53358 1.43096 1.07471 1.40285 1.28916
  -2   6  -343610.07 2358.02   1-0.42713 0.18224-0.82193-1.17902-1.27069-1.38481
  -2   6  -343030.39 2576.71   1-0.84268-0.23324-1.53097-1.88714-0.84268-0.95692
   2  -6   344168.53 3140.85   1-0.25126-0.86070-1.54489-1.18872-0.25126-0.13702
  -2   6  -342033.13 2272.50   1 0.11895 0.72845 1.79815 1.44206 1.26920 1.15514
  -2   6  -344170.08 2545.54   1-0.61506-0.00596-1.24442-1.60123-1.26524-1.37921
   2  -6   225132.09 2059.73   1-0.30463-0.85391-0.98566-0.47711 0.30463 0.49658
  -2   6  -222407.51 1484.44   1-0.73613-0.18685-0.19217-0.70070 0.73613 0.54418
  -2   6  -224737.05 1888.95   1 0.04894 0.59792 1.31382 0.80609 1.40526 1.21370
  -2   6  -225164.17 1871.29   1-0.51553 0.03317-0.67219-1.18062-1.20333-1.39525
  -2   6  -223521.81 1734.52   1-0.96343-0.41462-1.26836-1.77591-0.96343-1.15560
   2  -6   221841.44 2043.12   1-0.50799-1.05681-1.64849-1.14093-0.50799-0.31582
  -2   6  -225548.93 1709.90   1-0.73158-0.18313-1.00372-1.51182-1.19152-1.38328
   2  -6   222022.62 1590.45   1-0.29992-0.84836-1.66304-1.15495-1.31175-1.12000
  -2   6  -1 1050.13  311.37   1-0.79003-0.30141-0.05267-0.71270 0.79003 0.52008
  -2   6  -1 1026.11  346.46   1 0.14655 0.63490 1.20728 0.54809 1.39162 1.12219
  -2   6  -1 1121.77  359.72   1-0.60177-0.11373-0.50943-1.16922-1.12039-1.39013
  -2   6  -1 1134.42  377.27   1-0.99394-0.50576-0.90423-1.56316-0.99394-1.26406
   2  -6   1  979.29  329.00   1-0.72541-1.21360-1.62297-0.96403-0.72541-0.45530
  -2   6  -1 1270.87  425.70   1-0.82532-0.33754-0.75053-1.40990-1.09305-1.36258
   2  -6   1 1006.43  340.95   1-0.44122-0.92900-1.50850-0.84910-1.31270-1.04315
   2  -6   016197.32 1234.94   1-0.44861-0.87658-0.76635 0.04522 0.44861 0.79657
  -2   6   013537.18 1106.84   1-0.83884-0.41087 0.08892-0.72264 0.83884 0.49088
  -2   6   013730.73 1254.22   1-0.68264-0.25528-0.33829-1.14939-1.02349-1.37101
   2  -6   015507.20 1318.93   1-0.21872-0.64611-1.11982-0.30874-1.37255-1.02504
  -2   6   014845.82 1286.39   1-0.95362-0.52601-0.53994-1.35011-0.95362-1.30155
   2  -6   014691.56 1450.83   1-0.86562-1.29316-1.50119-0.69088-0.86562-0.51757
  -2   6   016294.10 1435.90   1-0.89519-0.46806-0.50033-1.31099-0.97921-1.32653
   2  -6  -129004.44 1819.62   1-0.48398-0.85129-0.70671 0.25636 0.48398 0.90994
  -2   6   125995.28 1815.63   1-0.88130-0.51433-0.22913-1.19074-0.88130-1.30724
   2  -6  -126606.40 1828.46   1-0.93876-1.30569-1.35433-0.39263-0.93876-0.51278
  -2   6   129772.67 2136.17   1-0.94361-0.57714-0.26245-1.22442-0.85790-1.28301
   2  -6  -2 5858.26  717.31   1-0.50230-0.80895-0.67485 0.43975 0.50230 1.00627
  -2   6   2 5355.89  927.93   1-0.82032-0.51431 0.01358-1.10020-0.79604-1.29917
  -2   6   2 5604.80  797.51   1-0.80077-0.49442 0.02295-1.09010-0.80077-1.30472
   2  -6  -2 5742.99  961.76   1-0.97214-1.27844-1.22716-0.11409-0.97214-0.46823
  -2   6   2 5460.30  792.16   1-0.97418-0.66837-0.04084-1.15410-0.73433-1.23722
   2  -6  -3 7011.11  974.35   1-0.50714-0.75314-0.66631 0.59979 0.50714 1.08911
  -2   6   3 6328.61  877.04   1-0.87505-0.62971 0.18850-1.07661-0.66942-1.25035
  -2   6   3 6408.17  979.63   1-0.72104-0.47533 0.22873-1.03576-0.72104-1.30300
  -2   6   3 6658.82  875.53   1-0.99033-0.74519 0.16385-1.10070-0.61142-1.19210
   2  -6  -4   72.55  113.83   1-0.50088-0.68623-0.67732 0.74027 0.50088 1.16085
  -2   6   4   94.49  141.61   1-0.91977-0.73510 0.36016-1.05628-0.53629-1.19501
  -2   6   4   91.99  144.75   1-0.64438-0.45929 0.40100-1.01492-0.64438-1.30435
   2  -6  -5 7477.60 1003.36   1-0.48505-0.60974-0.70487 0.86424 0.48505 1.22302
  -2   6   5 5966.50  923.36   1-0.95430-0.83031 0.52736-1.04043-0.39770-1.13424
  -2   6   5 6969.05  950.62   1-0.57067-0.44622 0.54937-1.01802-0.57067-1.30866
  -2   6   5 6529.60  824.96   1-0.98981-0.86598 0.52711-1.04003-0.37209-1.10835
  -2   7 -10 4221.59  949.52   1-0.25058 0.84431-1.54448-0.99402-0.25058 0.08181
   2  -7  10 3017.08  887.46   1 0.10802-0.98695 1.80426 1.25378 1.26528 0.93359
  -2   7  -921283.93 2004.93   1-0.28289 0.75138-1.56359-1.16451-0.28289-0.02841
   2  -7   916193.37 1825.77   1 0.15977-0.87457 1.77336 1.37427 1.28253 1.02865
  -2   7  -834400.32 2828.30   1-0.33600 0.63764-1.59151-1.34380-0.33600-0.15947
  -2   7  -833418.01 2427.79   1-0.23103 0.74238-1.72228-1.47582-1.30068-1.12452
  -2   7  -722075.60 1648.68   1-0.51731 0.39673 1.64992 1.74436 0.51731 0.61499
  -2   7  -723078.30 1528.44   1-0.31845 0.59470-0.98610-0.89118-1.33293-1.23474
  -2   7  -722630.00 1853.20   1-0.41769 0.49540 0.81651 0.91339-0.41769-0.31844
  -2   7  -723670.04 2034.57   1-0.41570 0.49731-1.62465-1.52833-0.41570-0.31710
  -2   7  -722006.74 2028.87   1-0.54380 0.36927 1.73818 1.83449 0.74844 0.84673
  -2   7  -724653.17 1685.95   1-0.32014 0.59261-1.64373-1.54859-1.31373-1.21537
  -2   7  -610218.36 1083.67   1-0.55354 0.29958-0.58183-0.63762 0.55354 0.57466
  -2   7  -611142.99 1303.12   1-0.31315 0.54008 1.58005 1.52305 0.31315 0.33294
  -2   7  -610912.17 1151.88   1-0.42258 0.43004 1.63730 1.58220 1.27374 1.29481
  -2   7  -611847.46 1133.90   1-0.36478 0.48769-0.91861-0.97501-1.30897-1.28857
  -2   7  -6 9586.81 1101.99   1-0.29899 0.55348 0.99355 0.93901-0.29899-0.27774
  -2   7  -611065.95 1238.80   1-0.52720 0.32519-1.65126-1.70634-0.52720-0.50653
  -2   7  -611920.23 1395.55   1-0.36382 0.48861 1.84917 1.79411 0.95215 0.97265
  -2   7  -610517.97 1032.16   1-0.42346 0.42863-1.53054-1.58669-1.31430-1.29374
   2  -7   534837.58 2345.95   1 0.12486-0.66761-1.45548-1.24815-0.12486-0.06797
  -2   7  -536459.31 2285.06   1-0.59743 0.19504-0.49722-0.70454 0.59743 0.54054
  -2   7  -538840.60 2125.22   1-0.26381 0.52817 1.56573 1.35918 1.35660 1.29981
  -2   7  -537894.42 1920.55   1-0.42161 0.37019-0.83077-1.03851-1.27437-1.33177
  -2   7  -538107.29 2243.23   1-0.14662 0.64522 1.18858 0.98258-0.14662-0.20338
  -2   7  -536051.50 2274.84   1-0.66969 0.12207-1.64323-1.84967-0.66969-0.72695
  -2   7  -538237.23 2082.49   1-0.16581 0.62599 1.88348 1.67703 1.11852 1.06122
  -2   7  -539298.57 2011.75   1-0.53377 0.25766-1.37961-1.58704-1.29514-1.35235
   2  -7   456775.25 3600.51   1-0.03492-0.76674-1.31059-0.95178 0.03492 0.16980
  -2   7  -454429.51 3294.06   1-0.64676 0.08505-0.39597-0.75479 0.64676 0.51187
  -2   7  -462029.13 3229.79   1-0.12046 0.61088 1.46742 1.10941 1.39662 1.26196
  -2   7  -459210.72 2898.71   1-0.48559 0.24554-0.72469-1.08376-1.22799-1.36319
  -2   7  -460234.37 3594.09   1 0.04855 0.77977 1.39063 1.03321 0.04855-0.08622
  -2   7  -460828.17 3408.40   1-0.82460-0.09347-1.55100-1.90885-0.82460-0.95981
  -2   7  -463433.79 3172.69   1 0.03091 0.76209 1.84084 1.48300 1.23334 1.09824
  -2   7  -458403.21 3198.00   1-0.64196 0.08881-1.19435-1.55304-1.25184-1.38682
   2  -7   321660.80 2091.25   1-0.16195-0.83311-1.17048-0.66013 0.16195 0.37484
  -2   7  -318113.26 1468.05   1-0.69832-0.02715-0.28202-0.79235 0.69832 0.48543
  -2   7  -322484.72 1761.12   1 0.00105 0.67177 1.36126 0.85178 1.40697 1.19445
  -2   7  -321061.36 1326.15   1-0.55339 0.11705-0.60294-1.11335-1.16920-1.38221
  -2   7  -318433.63 1681.76   1-0.94761-0.27710-1.32722-1.83643-0.94761-1.16075
   2  -7   321763.81 1900.10   1-0.28324-0.95375-1.56378-1.05458-0.28324-0.07010
  -2   7  -322009.51 1500.99   1-0.73969-0.06957-0.98433-1.49433-1.18466-1.39745
   2  -7   320312.79 1599.81   1-0.20808-0.87831-1.73983-1.22957-1.29556-1.08266
   2  -7   2 2373.48  609.16   1-0.25803-0.86854-1.04935-0.38750 0.25803 0.54893
  -2   7  -2 2127.94  557.27   1-0.74952-0.13901-0.15888-0.82071 0.74952 0.45863
  -2   7  -2 2410.11  474.19   1 0.09868 0.70876 1.26120 0.60026 1.40003 1.10964
  -2   7  -2 2285.97  431.13   1-0.62197-0.01219-0.46854-1.13028-1.09811-1.38891
  -2   7  -2 2225.36  584.46   1-0.99470-0.38482-0.98796-1.64857-0.99470-1.28577
   2  -7   2 2094.41  549.50   1-0.52391-1.13380-1.65084-0.99025-0.52391-0.23284
  -2   7  -2 2616.37  546.02   1-0.82164-0.21218-0.76189-1.42318-1.09785-1.38843
   2  -7   2 2387.69  557.73   1-0.35313-0.96259-1.61030-0.94902-1.31570-1.02513
  -2   7  -1 7236.59  817.66   1-0.68870-0.13959-0.32460-1.13768-1.01534-1.38395
  -2   7  -1 7988.12  871.09   1-0.96695-0.41762-0.61976-1.43151-0.96695-1.33576
   2  -7   1 7223.00 1058.52   1-0.71997-1.26923-1.62547-0.81349-0.71997-0.35096
  -2   7  -1 8044.69  888.12   1-0.88596-0.33716-0.53800-1.35058-0.99729-1.36565
   2  -7   0 1714.55  382.78   1-0.37491-0.86411-0.88304 0.08181 0.37491 0.82181
  -2   7   0 1729.34  395.05   1-0.75152-0.26309-0.17410-1.13850-0.92193-1.36834
  -2   7   0 1251.96  435.86   1-0.89829-0.40958-0.29155-1.25476-0.89829-1.34511
   2  -7   0 1423.52  473.60   1-0.84779-1.33642-1.52477-0.56141-0.84779-0.40085
  -2   7   0 1565.33  417.84   1-0.93335-0.44521-0.32029-1.28416-0.88850-1.33464
   2  -7  -115930.68 1499.72   1-0.40454-0.83309-0.83731 0.27908 0.40454 0.92945
  -2   7   116715.89 1273.75   1-0.81677-0.38870-0.02277-1.13741-0.81677-1.34160
   2  -7  -114536.24 1454.48   1-0.91917-1.34717-1.40467-0.28993-0.91917-0.39429
  -2   7   117263.35 1314.74   1-0.96573-0.53824-0.11296-1.22812-0.77563-1.29955
   2  -7  -212522.48 1557.93   1-0.41963-0.78752-0.81339 0.45449 0.41963 1.02254
  -2   7   212761.57 1368.45   1-0.85974-0.49265 0.13653-1.13056-0.70798-1.30999
  -2   7   212663.01 1376.31   1-0.73487-0.36742 0.19527-1.07081-0.73487-1.33771
   2  -7  -212370.43 1387.61   1-0.95574-1.32310-1.29895-0.03282-0.95574-0.35293
  -2   7   212711.38 1475.22   1-0.98529-0.61846 0.08233-1.18414-0.66138-1.26310
   2  -7  -3   43.95  126.15   1-0.42260-0.72983-0.80866 0.61074 0.42260 1.10351
  -2   7   3   47.42  125.87   1-0.90328-0.59686 0.29270-1.12572-0.58968-1.26949
  -2   7   3   48.90  105.00   1-0.65615-0.34933 0.37588-1.04165-0.65615-1.33700
  -2   7   3   27.20  111.12   1-0.99403-0.68786 0.26542-1.15234-0.54729-1.22679
   2  -7  -4 7583.88 1110.61   1-0.41512-0.66170-0.82059 0.75032 0.41512 1.17403
  -2   7   4 7395.54 1045.55   1-0.93896-0.69322 0.44750-1.12226-0.46503-1.22264
  -2   8 -10  672.36  334.83   1-0.34162 0.81435-1.59419-1.19678-0.34162-0.10811
  -2   8  -9 1018.05  427.70   1-0.38997 0.70537-1.61515-1.36911-0.38997-0.23439
  -2   8  -8 1159.04  375.25   1-0.46132 0.57340-1.63852-1.54387-0.46132-0.38368
  -2   8  -8 1424.97  469.01   1-0.41683 0.61760-1.53857-1.44533-1.31478-1.23745
  -2   8  -765212.03 4644.99   1-0.40953 0.56557 1.62248 1.56351 0.40953 0.40819
  -2   8  -757848.40 3513.09   1-0.46126 0.51296-0.76598-0.82435-1.24661-1.24728
  -2   8  -758782.42 3889.78   1-0.55951 0.41457-1.65405-1.71078-0.55951-0.55981
  -2   8  -760178.11 3935.41   1-0.50018 0.47359-1.42921-1.48725-1.30337-1.30382
  -2   8  -6 8806.04 1045.55   1-0.59346 0.32090-0.50508-0.71418 0.59346 0.51563
  -2   8  -610007.67 1053.35   1-0.24161 0.67268 1.53889 1.32848 0.24161 0.16238
  -2   8  -6 9328.03 1330.03   1-0.30982 0.60390 1.59074 1.38245 1.33700 1.25925
  -2   8  -610779.07 1021.19   1-0.49901 0.41454-0.70139-0.91111-1.21718-1.29566
  -2   8  -610515.22 1138.25   1-0.68400 0.22945-1.63911-1.84723-0.68400-0.76223
  -2   8  -610725.13 1213.85   1-0.24438 0.66910 1.87965 1.67146 1.05894 0.98060
  -2   8  -610358.42 1057.85   1-0.58873 0.32438-1.29073-1.50007-1.27658-1.35483
   2  -8   5 3078.92  699.55   1 0.09241-0.76129-1.42888-1.06826-0.09241 0.06341
  -2   8  -5 3000.85  628.17   1-0.63275 0.22094-0.42543-0.78605 0.63275 0.47692
  -2   8  -5 3357.47  575.76   1-0.54462 0.30825-0.61929-0.98032-1.17742-1.33369
  -2   8  -5 3509.18  721.58   1-0.82165 0.03118-1.55403-1.91354-0.82165-0.97781
  -2   8  -5 3742.89  626.08   1-0.05879 0.79406 1.86934 1.50977 1.18694 1.03081
  -2   8  -5 3575.35  537.84   1-0.67623 0.17622-1.12610-1.48670-1.23183-1.38785
   2  -8   4 1031.43  427.83   1-0.03289-0.82594-1.31265-0.80050 0.03289 0.26672
  -2   8  -4 1007.22  316.06   1-0.59545 0.19674-0.52200-1.03435-1.12713-1.36119
  -2   8  -4  936.30  381.13   1-0.93872-0.14651-1.35443-1.86532-0.93872-1.17282
  -2   8  -4  807.02  317.79   1 0.11328 0.90551 1.80134 1.29039 1.26718 1.03325
  -2   8  -4 1087.73  365.08   1-0.75693 0.03486-0.94177-1.45368-1.16919-1.40300
   2  -8   3 6640.74  945.66   1-0.13321-0.86561-1.20413-0.54049 0.13321 0.44505
  -2   8  -3 6592.30  749.07   1-0.64902 0.08250-0.41191-1.07562-1.06633-1.37821
  -2   8  -3 5225.04 1043.46   1-0.99333-0.26175-1.03668-1.69894-0.99333-1.30536
   2  -8   3 6785.76 1126.63   1-0.28665-1.01823-1.56572-0.90345-0.28665 0.02538
  -2   8  -3 7578.41  889.93   1-0.82679-0.09565-0.74592-1.40912-1.09109-1.40269
   2  -8   2  291.72  223.59   1-0.21022-0.88196-1.11131-0.29616 0.21022 0.60005
  -2   8  -2  282.74  161.35   1-0.70313-0.03227-0.29146-1.10651-0.99536-1.38504
  -2   8  -2  247.72  187.55   1-0.97375-0.30280-0.66707-1.48072-0.97375-1.36372
   2  -8   2  287.02  243.65   1-0.51379-1.18474-1.64941-0.83576-0.51379-0.12382
  -2   8  -2  308.72  199.92   1-0.88388-0.21340-0.54628-1.36076-1.00123-1.39060
  -2   8  -1 5294.57  642.27   1-0.75590-0.14572-0.16295-1.12933-0.91474-1.38223
   2  -8   1 4310.40  814.54   1-0.69616-1.30648-1.63506-0.67002-0.69616-0.22825
  -2   8  -1 5169.19  739.90   1-0.92796-0.31814-0.34872-1.31452-0.90329-1.37047
   2  -8   0  783.17  331.96   1-0.30568-0.85611-0.98418 0.13400 0.30568 0.85153
  -2   8   0  691.12  251.32   1-0.80580-0.25629-0.02852-1.14624-0.82518-1.37046
   2  -8   0 1029.30  508.79   1-0.81813-1.36783-1.55754-0.44112-0.81813-0.27228
  -2   8   0  801.15  298.83   1-0.95984-0.41068-0.15712-1.27421-0.80041-1.34537
   2  -8  -154377.54 3148.83   1-0.32980-0.81957-0.94983 0.31986 0.32980 0.95365
  -2   8   160028.38 2690.75   1-0.98077-0.49227 0.02650-1.24186-0.69482-1.31756
   2  -8  -2 4593.92  752.69   1-0.34124-0.77036-0.93321 0.48799 0.34124 1.04310
  -2   8   2 4719.23  737.05   1-0.89230-0.46414 0.25071-1.16966-0.62220-1.32308
  -2   8   2 4810.90  751.76   1-0.99203-0.56419 0.20133-1.21832-0.58800-1.28852
  -2   9  -7   44.54  120.07   1-0.34315 0.69301 1.59491 1.38255 0.34315 0.24279
  -2   9  -7   57.96  102.45   1-0.57326 0.46204-0.56526-0.77693-1.14990-1.24945
  -2   9  -7  114.45  184.12   1-0.64616 0.38863-1.18626-1.39749-1.24957-1.34884
  -2   9  -6 6832.22  904.63   1-0.20461 0.77064 1.51457 1.15053 0.20461 0.02616
  -2   9  -6 7190.08  845.57   1-0.60359 0.37103-0.50580-0.86879-1.11844-1.29578
  -2   9  -6 6974.67  850.17   1-0.71565 0.25848-1.04065-1.40317-1.20424-1.38130
   2  -9   5 6364.15  903.33   1 0.08395-0.83098-1.42171-0.90777-0.08395 0.17082
  -2   9  -5 7103.62  933.60   1-0.64018 0.27376-0.43066-0.94500-1.07697-1.33212
  -2   9  -5 6880.06  911.32   1-0.78097 0.13250-0.87895-1.39278-1.14532-1.40017
   2  -9   437019.39 3032.64   1-0.01711-0.87139-1.32845-0.66302 0.01711 0.34988
  -2   9  -434392.25 2762.32   1-0.68090 0.17238-0.34220-1.00789-1.02582-1.35877
  -2   9  -440841.23 2534.08   1-0.83906 0.01375-0.70675-1.37186-1.07423-1.40687
   2  -9   3   20.01  112.21   1-0.09836-0.89199-1.24340-0.42644 0.09836 0.50914
  -2   9  -3   11.52  109.76   1-0.72381 0.06879-0.24255-1.05957-0.96527-1.37602
  -2   9  -3   86.76  131.15   1-0.88810-0.09594-0.52943-1.34584-0.99321-1.40363
  -2   9  -2 8791.59  946.18   1-0.76721-0.03528-0.13372-1.10206-0.89572-1.38427
  -2   9  -2 9305.03  876.57   1-0.92742-0.19592-0.35148-1.31918-0.90471-1.39292
   2  -9   113532.17 1353.75   1-0.20740-0.87972-1.11486 0.00513 0.20740 0.77419
  -2   9  -114782.77 1140.83   1-0.80964-0.13838-0.01754-1.13723-0.81763-1.38399
  -2   9  -115675.17 1321.05   1-0.95714-0.28630-0.17615-1.29514-0.81096-1.37696
   2  -9   010948.03 1316.48   1-0.23910-0.85076-1.07430 0.19720 0.23910 0.88389
  -2   9   011581.55 1213.13   1-0.84983-0.23925 0.10427-1.16673-0.73151-1.37566
  -2   9   012624.38 1186.05   1-0.97779-0.36761-0.00552-1.27579-0.71372-1.35749
   2  -9  -111160.58 1250.41   1-0.25804-0.80905-1.04934 0.37366 0.25804 0.98084
  -2   9   113612.85 1293.77   1-0.99010-0.44058 0.15929-1.26226-0.61425-1.33580
  -2  10  -7 1788.19  494.33   1-0.30562 0.79160 1.57609 1.21033 0.30562 0.10624
  -2  10  -7 1723.66  454.93   1-0.66197 0.43439-0.38401-0.74897-1.05030-1.24872
  -2  10  -6 1782.95  529.76   1-0.19026 0.84603 1.50461 0.98718 0.19026-0.08721
  -2  10  -6 1511.57  402.06   1-0.68647 0.34922-0.32966-0.84597-1.01836-1.29459
  -2  10  -6 1850.53  612.80   1-0.80993 0.22522-0.79718-1.31291-1.11256-1.38844
   2 -10   539092.05 2512.01   1 0.09082-0.88534-1.42754-0.76030-0.09082 0.26289
  -2  10  -540978.46 2158.26   1-0.71609 0.25893-0.26102-0.92866-0.97672-1.33074
  -2  10  -541230.81 2041.73   1-0.85681 0.11768-0.64673-1.31376-1.04765-1.40131
   2 -10   413158.50 1432.16   1 0.00772-0.90778-1.35266-0.53391-0.00772 0.42399
  -2  10  -414274.75 1181.46   1-0.74908 0.16527-0.18028-0.99928-0.92591-1.35775
  -2  10  -414074.64 1061.15   1-0.89757 0.01626-0.49032-1.30862-0.97435-1.40579
   2 -10   3 3816.95 1034.77   1-0.05913-0.91399-1.28559-0.31533 0.05913 0.56885
  -2  10  -3 3966.71  735.90   1-0.78388 0.06979-0.08936-1.05967-0.86637-1.37600
  -2  10  -3 4174.09  644.56   1-0.93129-0.07811-0.33131-1.30091-0.89425-1.40348
  -2  10  -2 7750.48  887.86   1-0.81912-0.02611 0.01003-1.11161-0.79852-1.38594
  -2  10  -2 7859.50  889.63   1-0.95768-0.16516-0.17240-1.29330-0.80889-1.39591
   2 -10   1 4867.29  764.03   1-0.14861-0.88216-1.18624 0.08705 0.14861 0.81434
  -2  10  -1 5738.53  780.48   1-0.85357-0.12124 0.11633-1.15666-0.72275-1.38799
  -2  10  -1 5628.32  811.83   1-0.97680-0.24494-0.01550-1.28771-0.71957-1.38439
  -2  11  -6 6936.99 1075.15   1-0.19129 0.90604 1.50533 0.83448 0.19129-0.18521
  -2  11  -6 6518.39  976.27   1-0.75343 0.34334-0.16925-0.83887-0.91881-1.29392
   2 -11   5   74.51  166.19   1 0.10823-0.92916-1.44204-0.62148-0.10823 0.34442
  -2  11  -5  136.42  159.79   1-0.77764 0.25846-0.10615-0.92711-0.87755-1.33046
  -2  11  -5  102.10  145.67   1-0.91112 0.12439-0.43056-1.25079-0.94489-1.39737
   3   9  -4  327.15  249.96   1-0.40593 0.29548 1.62118 0.68393 0.40593-0.54208
   3   9  -4  341.70  223.06   1-0.99471-0.29372 0.92677-0.01070-0.02509-0.97239
   3   9  -5 6825.93  889.06   1-0.45632 0.30590 1.63719 0.85136 0.45632-0.41380
   3   9  -5 7292.95 1075.30   1-0.99458-0.23291 0.91777 0.13163-0.03425-0.90375
   3   9  -610418.48 1328.81   1-0.51344 0.30961 1.64935 1.01496 0.51344-0.27880
   3   9  -611012.81 1123.14   1-0.99471-0.17237 0.92669 0.29189-0.02517-0.81687
   3   9  -723110.45 1723.79   1-0.57564 0.30822 1.65451 1.17152 0.57564-0.13871
   3   9  -8   13.13  103.73   1-0.64096 0.30372 1.64943 1.31785 0.64096 0.00449
   3   8  -1   43.22  124.20   1-0.28767 0.17023 1.56629 0.32819 0.28767-0.79498
   3   8  -1   49.63  123.06   1-0.99419-0.53629 1.00099-0.23717 0.05208-1.02973
   3   8  -1   30.97  134.41   1-0.89722-0.44015 1.10891-0.12735 0.07785-1.00326
   3   8  -2   91.07  148.66   1-0.32017 0.19855 1.58365 0.49696 0.32017-0.68459
   3   8  -2  120.63  137.12   1-0.99484-0.47627 0.96123-0.12559 0.01038-0.99364
   3   8  -2  112.03  147.31   1-0.90701-0.38931 1.07307-0.01181 0.04716-0.95615
   3   8  -3 2300.68  510.79   1-0.36272 0.21681 1.60381 0.66856 0.36272-0.56415
   3   8  -3 2281.29  517.77   1-0.99477-0.41552 0.93130-0.00421-0.02047-0.94669
   3   8  -3 2297.22  637.42   1-0.91263-0.33430 1.05133 0.11786 0.02878-0.89672
   3   8  -428170.83 1699.72   1-0.99451-0.35459 0.91413 0.12995-0.03794-0.88637
   3   8  -512147.39 1076.99   1-0.47406 0.22710 1.64168 1.00924 0.47406-0.29704
   3   8  -513585.19 1227.87   1-0.99450-0.29391 0.91377 0.28094-0.03831-0.80893
   3   8  -6   12.03   97.29   1-0.53975 0.22223 1.65263 1.17163 0.53975-0.15346
   3   8  -6   -0.29   97.22   1-0.99481-0.23354 0.93581 0.45431-0.01585-0.70867
   3   8  -7  878.17  321.13   1-0.60927 0.21352 1.65335 1.32378 0.60927-0.00605
   3   8  -821667.48 1560.95   1-0.68005 0.20356 1.64033 1.46214 0.68005 0.14260
   3   8  -9 2890.13  593.85   1-0.74932 0.19511 1.61042 1.58365 0.74932 0.28975
   3   8 -10 2758.43  567.62   1-0.81435 0.19090 1.56123 1.68587 0.81435 0.43267
   3   7   0 8177.58 1104.50   1-0.24809 0.08794 1.54293 0.30680 0.24809-0.81343
   3   7   0 8190.47 1309.93   1-0.99298-0.65683 1.03338-0.20282 0.08673-0.97401
   3   7   0 8755.56 1179.18   1-0.88945-0.55406 1.13575-0.09876 0.10115-0.95892
   3   7  -1 5394.13  804.79   1-0.27901 0.11783 1.56139 0.47668 0.27901-0.70462
   3   7  -1 5771.19  857.63   1-0.99449-0.59766 0.98866-0.09620 0.03905-0.94389
   3   7  -1 6074.58 1037.09   1-0.90115-0.50513 1.09479 0.01167 0.06571-0.91656
   3   7  -281966.16 4450.50   1-0.32140 0.13625 1.58427 0.65098 0.32140-0.58434
   3   7  -286030.13 3432.07   1-0.99487-0.53737 0.95278 0.01925 0.00162-0.90352
   3   7  -281531.92 4636.98   1-0.90890-0.45225 1.06582 0.13408 0.04103-0.86345
   3   7  -3 4929.85  844.84   1-0.37444 0.14403 1.60884 0.82697 0.37444-0.45342
   3   7  -3 5096.43  903.23   1-0.99474-0.47657 0.92870 0.14650-0.02312-0.85047
   3   7  -3 4876.17  959.61   1-0.91159-0.39431 1.05541 0.27505 0.03222-0.79446
  -3  -7   3 4904.40  896.34   1-0.82977-1.34736-0.73658 0.04473-1.08711-0.26037
   3   7  -4 5814.96 1021.85   1-0.99462-0.41577 0.92039 0.28953-0.03159-0.78114
   3   7  -4 5763.27  997.04   1-0.90644-0.32853 1.07519 0.44624 0.04898-0.69990
  -3  -7   4 5841.61 1035.61   1-0.76156-1.33981-0.93002-0.29999-1.16481-0.41586
   3   7  -544103.94 2703.24   1-0.50627 0.13383 1.64819 1.16917 0.50627-0.16581
   3   7  -544838.60 2294.02   1-0.99479-0.35527 0.93338 0.45384-0.01834-0.69009
  -3  -7   545013.23 2484.17   1-0.62602-1.26554-0.46022 0.01932-1.09351-0.42175
  -3  -7   539562.59 2694.82   1-0.62536-1.26427-1.22558-0.74684-1.26033-0.58916
   3   7  -6 2051.47  457.86   1-0.58046 0.12046 1.65454 1.32691 0.58046-0.01374
   3   7  -6 2106.80  588.36   1-0.99471-0.29451 0.97585 0.64766 0.02560-0.56834
  -3  -7   6 2092.54  611.34   1-0.54839-1.24858-0.61229-0.28409-1.17392-0.57997
  -3  -7   6 1588.63  676.51   1-0.32277-1.02234-1.64116-1.31371-1.31394-0.72056
   3   7  -7   71.08  113.93   1-0.65626 0.10548 1.64645 1.47024 0.65626 0.13994
  -3  -7   7  100.17  163.27   1-0.42117-1.18204-0.83148-0.65461-1.27467-0.75852
  -3  -7   7   60.20  122.85   1 0.00554-0.75512 1.35057 1.52378 0.00554 0.51985
   3   7  -8   34.10   94.60   1-0.73047 0.09208 1.62052 1.59573 0.73047 0.29204
  -3  -7   8   21.24   77.59   1-0.16017-0.98145 1.17260 1.19436-0.16017 0.27612
   3   7  -9 6343.99  846.76   1-0.79998 0.08339 1.57428 1.70090 0.79998 0.43943
  -3  -7   9 5613.53 1075.49   1-0.20738-1.08930 1.11488 0.98519-0.20738 0.15089
   3   7 -1019762.50 1511.15   1-0.86200 0.08219 1.50625 1.78430 0.86200 0.57934
  -3  -7  1018447.25 2127.99   1-0.21616-1.15871 1.10380 0.82267-0.21616 0.06410
   3   6   210885.19 1142.20   1-0.19694-0.04374 1.50929 0.12365 0.19694-0.92139
   3   6   212394.46 1399.20   1-0.85927-0.70620 1.22910-0.15506 0.18447-0.93236
   3   6   113560.90 1242.34   1-0.21221 0.00180 1.51974 0.28549 0.21221-0.82825
   3   6   114621.20 1437.88   1-0.99005-0.77565 1.08055-0.15367 0.13834-0.90132
  -3  -6  -114699.12 1561.01   1-0.33805-0.55218-1.59249-0.36083-0.33805 0.70130
   3   6   116099.09 1399.14   1-0.87617-0.66247 1.17879-0.05400 0.13910-0.89994
   3   6   0   58.12  120.17   1-0.24091 0.03406 1.53845 0.45571 0.24091-0.72159
   3   6   0   59.40  120.04   1-0.99303-0.71795 1.03239-0.05050 0.08566-0.87620
  -3  -6   0   55.41   93.13   1-0.46229-0.73704-1.63877-0.55851-0.46229 0.49912
   3   6   0   50.54  148.01   1-0.88955-0.61522 1.13541 0.05401 0.10085-0.86039
   3   6  -1 1082.63  416.56   1-0.28283 0.05296 1.56356 0.63224 0.28283-0.60179
   3   6  -1 1116.54  364.51   1-0.99441-0.65866 0.99216 0.06060 0.04275-0.84132
  -3  -6   1  775.19  426.39   1-0.90347-1.23924-0.31152 0.61731-0.90347-0.01999
  -3  -6   1  910.39  488.51   1-0.67514-1.01052-1.64174-0.71284-0.67514 0.20834
   3   6  -1 1128.09  371.25   1-0.89899-0.56402 1.10257 0.17256 0.07240-0.81105
   3   6  -2 1852.47  439.35   1-0.33715 0.05945 1.59205 0.81216 0.33715-0.46957
   3   6  -2 2037.58  483.96   1-0.99484-0.59841 0.96279 0.18257 0.01199-0.79427
  -3  -6   2 1149.27  996.19   1-0.98254-1.37863-0.74013 0.03754-0.98254-0.17683
  -3  -6   2 1154.22  942.69   1-0.98514-1.38123-1.14155-0.36389-0.98514-0.17943
   3   6  -2 1962.12  551.30   1-0.90351-0.50791 1.08612 0.30750 0.05829-0.74735
  -3  -6   2 1855.16  520.49   1-0.91023-1.30613-0.43466 0.34475-0.94694-0.14123
   3   6  -310028.60 1076.61   1-0.40242 0.05499 1.61990 0.99141 0.40242-0.32642
   3   6  -311154.76 1141.07   1-0.99487-0.53777 0.94825 0.31936-0.00306-0.73153
   3   6  -311500.69 1357.04   1-0.90076-0.44453 1.09621 0.46899 0.06693-0.66092
  -3  -6   310375.91 1277.11   1-0.87665-1.33322-0.57433 0.05379-1.01443-0.28650
   3   6  -4  297.94  176.74   1-0.47633 0.04190 1.64220 1.16515 0.47633-0.17462
   3   6  -4  400.55  222.98   1-0.99487-0.47710 0.95408 0.47652 0.00296-0.64770
  -3  -6   4  349.95  220.16   1-0.73144-1.24921-0.22405 0.25351-0.95370-0.30303
   3   6  -4  292.21  207.04   1-0.88433-0.36747 1.15273 0.67687 0.11603-0.53402
  -3  -6   4  330.17  238.97   1-0.80324-1.32046-0.81673-0.33990-1.12056-0.47042
   3   6  -536781.41 1714.80   1-0.55579 0.02325 1.65385 1.32821 0.55579-0.01727
   3   6  -536922.92 2031.91   1-0.99449-0.41604 0.98849 0.66228 0.03888-0.53398
  -3  -6   536241.18 2156.43   1-0.67775-1.25619-0.34923-0.02302-1.02997-0.45711
  -3  -6   521966.04 1879.74   1-0.62394-1.20184-1.22820-0.90266-1.26102-0.68867
   3   6  -616079.38 1179.13   1-0.63716 0.00270 1.65004 1.47581 0.63716 0.14197
   3   6  -615975.29 1339.02   1-0.99123-0.35210 1.06427 0.88938 0.12036-0.37470
  -3  -6   615952.67 1503.06   1-0.58296-1.22207-0.54652-0.37161-1.14012-0.64504
  -3  -6   611827.66 1685.80   1-0.32952-0.96845 0.95024 1.12185-0.32952 0.16389
   3   6  -7 3996.33  703.09   1-0.71662-0.01593 1.62696 1.60416 0.71662 0.29932
  -3  -6   7 3288.42  779.48   1-0.41010-1.10990-0.84904-0.82547-1.28187-0.86460
  -3  -6   7 3657.63  853.32   1-0.38151-1.08106 0.87298 0.89316-0.38151 0.03389
   3   6  -8  289.53  179.48   1-0.79057-0.02906 1.58210 1.71071 0.79057 0.45115
  -3  -6   8  247.35  254.98   1-0.38224-1.14242 0.87188 0.74062-0.38224-0.04483
   3   6  -9 2498.59  567.77   1-0.85597-0.03365 1.51437 1.79439 0.85597 0.59444
  -3  -6   9 2359.45  657.11   1-0.36443-1.18524 0.89887 0.61616-0.36443-0.10504
   3   6 -1047654.23 2172.61   1-0.91045-0.02732 1.42380 1.85525 0.91045 0.72681
  -3  -6  1043520.25 2699.15   1-0.33704-1.21849 0.93935 0.50518-0.33704-0.15567
   3   6 -11 6088.84  975.02   1-0.95233-0.00838 1.31124 1.89409 0.95233 0.84657
  -3  -6  11 6475.21 1018.52   1-0.30360-1.24566 0.98709 0.40152-0.30360-0.20023
   3   5   3 1763.00  502.25   1-0.97609-0.94411 1.19668-0.18690 0.27207-0.82432
   3   5   3 1789.27  568.55   1-0.83832-0.80693 1.28576-0.09669 0.23695-0.85886
  -3  -5  -2  153.40  150.63   1-0.22176-0.31425-1.52609-0.29605-0.22176 0.79661
   3   5   2  100.77  143.96   1-0.85680-0.76478 1.23609 0.00504 0.19086-0.82715
   3   5   1 3382.33  738.63   1-0.20727-0.05430 1.51639 0.43557 0.20727-0.73415
   3   5   1 3450.36  641.35   1-0.98909-0.83576 1.09241 0.01148 0.15154-0.78925
  -3  -5  -1 3258.75  699.87   1-0.78812-0.94154 0.05788 1.13655-0.78812 0.15248
  -3  -5  -1 3649.67  706.78   1-0.29633-0.44939-1.57108-0.49248-0.29633 0.64411
   3   5   1 3522.94  651.17   1-0.87163-0.71898 1.19277 0.11311 0.15160-0.78861
   3   5   0 1172.70  401.87   1-0.24828-0.03436 1.54305 0.61371 0.24828-0.61520
   3   5   0 1152.56  328.45   1-0.99212-0.77812 1.04982 0.12024 0.10456-0.75843
  -3  -5   0  927.29  324.09   1-0.75268-0.96673 0.15090 1.07812-0.75268 0.10990
  -3  -5   0 1234.88  396.68   1-0.42693-0.64061-1.62843-0.70120-0.42693 0.43558
   3   5   0 1057.15  372.37   1-0.88235-0.66907 1.15915 0.23088 0.12169-0.74072
   3   5  -1  322.15  207.23   1-0.34887-0.07295-0.92201-1.69951 0.34887-0.43640
   3   5  -1  384.24  220.67   1-0.30392-0.02919 1.57518 0.79727 0.30392-0.48167
   3   5  -1  371.87  211.32   1-0.99366-0.71899 1.01727 0.23902 0.06942-0.71577
  -3  -5   1  268.26  213.00   1-0.71047-0.98514 0.25378 1.02956-0.71047 0.07411
  -3  -5   1  336.84  209.54   1-0.64151-0.91582-1.64933-0.87350-0.64151 0.14307
   3   5  -1  330.17  205.60   1-0.88800-0.61408 1.14063 0.36374 0.10541-0.67920
  -3  -5   1  349.17  221.43   1-0.96189-1.23611-0.14223 0.63526-0.79210-0.00743
   3   5  -219266.02 1621.59   1-0.21473 0.12184-1.10561-1.73159 0.21473-0.49254
   3   5  -219860.31 1702.41   1-0.37260-0.03706 1.60806 0.98158 0.37260-0.33510
   3   5  -220563.92 1745.73   1-0.99425-0.65890 0.99873 0.37181 0.04969-0.65770
  -3  -5   221282.74 1792.53   1-0.83689-1.17225 0.06357 0.69050-0.76077-0.05337
  -3  -5   213129.70 1780.23   1-0.64959-0.98490 0.38993 1.01428-0.64959 0.05698
  -3  -5   211638.13 1406.76   1-0.91864-1.25358-1.40587-0.78141-0.91864-0.21199
   3   5  -221289.37 1622.23   1-0.88626-0.55171 1.14638 0.52090 0.11046-0.59635
  -3  -5   220848.61 1870.23   1-0.95115-1.28604-0.21598 0.41022-0.83282-0.12593
   3   5  -3  487.87  249.47   1-0.08692 0.31030-1.25592-1.73039 0.08692-0.54234
   3   5  -3  488.12  274.72   1-0.99422-0.59820 0.99984 0.52426 0.05087-0.57871
  -3  -5   3  582.90  258.88   1-0.82343-1.21946 0.02278 0.49837-0.78960-0.16001
  -3  -5   3  332.73  289.61   1-0.47557-0.87151 0.72112 1.19403-0.47557 0.15300
  -3  -5   3  337.19  311.27   1-0.93413-1.33008-0.44161 0.03131-0.93413-0.30555
   3   5  -3  533.79  254.95   1-0.87128-0.47610 1.19383 0.71972 0.15255-0.47647
  -3  -5   3  444.46  261.82   1-0.92342-1.31896-0.37178 0.10313-0.91515-0.28605
   3   5  -423169.07 1487.50   1 0.02870 0.48659-1.37245-1.69543-0.02870-0.57997
   3   5  -423145.16 1546.80   1-0.53721-0.08003 1.65237 1.32872 0.53721-0.01472
   3   5  -423446.43 1445.80   1-0.99318-0.53649 1.02890 0.70466 0.08191-0.46987
  -3  -5   423675.06 1869.11   1-0.79314-1.24984-0.06403 0.26023-0.84935-0.29756
  -3  -5   413269.11 1715.08   1-0.72954-1.18611 0.20826 0.52974-0.72954-0.17898
   3   5  -418602.88 2203.27   1-0.23599 0.22014-1.53531-1.85696-0.23599-0.78677
   3   5  -422054.00 1505.51   1-0.82432-0.36850 1.32061 0.99789 0.27005-0.28117
  -3  -5   417513.76 1786.06   1-0.84626-1.30247-0.68290-0.35928-1.06377-0.51246
   3   5  -532794.69 1628.82   1 0.12811 0.64665-1.45806-1.62953-0.12811-0.60137
   3   5  -533086.08 1741.86   1-0.62481-0.10681 1.65180 1.47953 0.62481 0.15075
   3   5  -534739.75 1951.87   1-0.98853-0.47116 1.09871 0.92579 0.15860-0.31539
  -3  -5   534541.78 2150.62   1-0.73303-1.25040-0.22016-0.04725-0.95125-0.47726
  -3  -5   527508.04 1976.94   1-0.65161-1.16881 0.38561 0.55564-0.65161-0.17907
   3   5  -532229.33 2270.16   1-0.79262-0.27580-1.58043-1.75075-0.79262-1.26547
  -3  -5   525873.35 2222.03   1-0.56249-1.07937-1.33442-1.16208-1.28627-0.81273
   3   5  -6  149.43  114.30   1-0.70976-0.13095 1.62985 1.60901 0.70976 0.31359
   3   5  -6  137.15  193.03   1-0.96957-0.39186 1.23230 1.21220 0.31530-0.08006
  -3  -5   6  152.40  150.50   1-0.61232-1.19036-0.48822-0.46663-1.10890-0.71271
  -3  -5   6  135.33  142.95   1-0.59932-1.17715 0.49346 0.51205-0.59932-0.20479
   3   5  -6  226.39  195.11   1-0.95924-0.38179-1.28553-1.30447-0.95924-1.35415
   3   5  -7 5939.33  822.53   1-0.78788-0.14825 1.58423 1.71481 0.78788 0.46960
  -3  -5   7 4390.43  735.92   1-0.33994-0.97867-0.95524-1.08498-1.32228-1.00389
  -3  -5   7 5506.93  908.89   1-0.55289-1.19133 0.58304 0.45018-0.55289-0.23637
   3   5  -7 5009.72  927.89   1-0.99291-0.35483-1.04574-0.91330-0.99291-1.30989
   3   5  -829045.19 1928.96   1-0.85590-0.15546 1.51445 1.79643 0.85590 0.61550
  -3  -5   826905.80 2151.43   1-0.50792-1.20700 0.66491 0.38062-0.50792-0.26941
   3   5  -9  574.17  249.27   1-0.91157-0.15030 1.42146 1.85487 0.91157 0.74905
  -3  -5   9  422.90  274.20   1-0.46293-1.22264 0.74250 0.30676-0.46293-0.30243
   3   5 -10   58.35  118.34   1-0.95353-0.13145 1.30700 1.89183 0.95353 0.86890
  -3  -5  10   76.08  141.34   1-0.41723-1.23757 0.81723 0.23005-0.41723-0.33474
   3   5 -11  382.20  218.47   1-0.98109-0.09820 1.17302 1.90928 0.98109 0.97435
  -3  -5  11  296.18  213.21   1-0.37046-1.25142 0.88979 0.15117-0.37046-0.36598
   3   4   4   93.76  145.55   1-0.96135-1.05111 1.26984-0.11167 0.36218-0.71302
   3   4   4  112.87  179.64   1 0.13006 0.04048 1.45960 0.07964 0.13006-0.94568
   3   4   4   87.22  161.99   1-0.81072-0.90102 1.35244-0.02826 0.30085-0.77392
  -3  -4  -319787.73 1584.13   1 0.15847 0.18640-1.48148-0.25124-0.15847 0.83987
   3   4   318112.50 1619.07   1-0.79398-0.82190-0.04183-1.27206 0.79398-0.20437
   3   4   321477.32 1742.49   1-0.97257-1.00167 1.21669-0.01359 0.29621-0.70130
   3   4   320206.98 1731.23   1 0.14998 0.12104 1.47507 0.24656 0.14998-0.84774
   3   4   322170.33 1550.36   1-0.83059-0.86025 1.30527 0.07596 0.25540-0.74157
   3   4   2 1441.71  431.05   1-0.67732-0.64459-0.32953-1.40824 0.67732-0.24302
  -3  -4  -2 1588.81  532.34   1-0.71368-0.74537 0.24622 1.32329-0.71368 0.20603
  -3  -4  -2 1876.72  482.78   1-0.19457-0.22597-1.50763-0.43064-0.19457 0.72490
   3   4   2 1804.76  502.54   1-0.84655-0.81558 1.26417 0.18625 0.21678-0.70240
   3   4   1  237.01  186.84   1-0.53868-0.44530-0.60941-1.53661 0.53868-0.30365
   3   4   1  212.19  167.65   1-0.21985-0.12781 1.52484 0.59746 0.21985-0.62250
   3   4   1  259.17  179.22   1-0.98591-0.89365 1.12512 0.19750 0.18846-0.65345
  -3  -4  -1  251.52  191.96   1-0.65155-0.74387 0.38574 1.31138-0.65155 0.19015
  -3  -4  -1  255.01  162.68   1-0.27827-0.37025-1.56096-0.63540-0.27827 0.56327
   3   4   1  206.24  164.66   1-0.85810-0.76650 1.23244 0.30590 0.18751-0.65386
   3   4   015730.61 1465.98   1-0.38443-0.23039-0.86852-1.64422 0.38443-0.37990
   3   4   016741.33 1507.03   1-0.27692-0.12406 1.56018 0.78423 0.27692-0.48754
   3   4   017005.14 1346.02   1-0.98913-0.83620 1.09193 0.31564 0.15100-0.61311
  -3  -4   015780.58 1421.17   1-0.56655-0.71949 0.55724 1.33142-0.56655 0.19714
  -3  -4   017466.32 1606.70   1-0.42135-0.57396-1.62657-0.85241-0.42135 0.34226
   3   4   017964.74 1526.60   1-0.86412-0.71188 1.21513 0.43998 0.17177-0.59182
  -3  -4   018345.39 1569.62   1-0.98831-1.14086 0.12747 0.90306-0.63388 0.12976
   3   4  -120353.23 1678.10   1-0.22378-0.00908-1.09408-1.71826 0.22378-0.46255
   3   4  -122195.49 1879.86   1-0.34972-0.13604 1.59799 0.97345 0.34972-0.33686
   3   4  -121095.18 1743.21   1-0.99068-0.77708 1.07214 0.44719 0.12903-0.55728
  -3  -4   122586.82 1693.33   1-0.89880-1.11240 0.27532 0.90027-0.60320 0.08311
  -3  -4   121651.98 1723.25   1-0.43272-0.64629 0.79233 1.41510-0.43272 0.25296
  -3  -4   123103.57 1716.65   1-0.64513-0.85837-1.64868-1.02590-0.64513 0.04055
   3   4  -122583.24 1648.34   1-0.86215-0.64928 1.22086 0.59709 0.17695-0.50883
  -3  -4   122583.38 1605.51   1-0.98794-1.20115 0.12142 0.74571-0.63759 0.04826
   3   4  -2 3356.65  836.87   1-0.06740 0.20794-1.27688-1.74955 0.06740-0.54092
   3   4  -2 3486.63  577.30   1-0.43496-0.16047 1.63098 1.15788 0.43496-0.17373
   3   4  -2 3505.23  590.23   1-0.99073-0.71645 1.07147 0.59786 0.12829-0.48021
  -3  -4   2 4082.97  767.66   1-0.89835-1.17262 0.27359 0.74721-0.60455 0.00396
  -3  -4   2 3192.48  646.49   1-0.18095-0.45515 1.14758 1.61889-0.18095 0.42672
  -3  -4   2 2560.67  648.38   1-0.90365-1.17752-1.43765-0.96625-0.90365-0.29590
   3   4  -2 3635.54  668.08   1-0.84622-0.57272 1.26506 0.79270 0.21761-0.39037
  -3  -4   2 3748.70  665.72   1-0.98396-1.25784 0.06476 0.53776-0.67197-0.06390
   3   4  -3 1304.30  364.98   1-0.98857-0.65362 1.09832 0.77604 0.15816-0.37255
  -3  -4   3 1354.38  420.63   1-0.88810-1.22306 0.23518 0.55747-0.63410-0.10338
  -3  -4   3  958.10  450.36   1-0.99161-1.32611-0.85124-0.53120-0.99161-0.46179
   3   4  -3 1280.96  506.01   1-0.28398 0.05050-1.56421-1.88425-0.28398-0.81380
   3   4  -3 1332.31  412.49   1-0.79891-0.46478 1.37864 1.05764 0.32667-0.20352
  -3  -4   3 1003.12  379.04   1-0.96842-1.30296-0.09124 0.23047-0.76330-0.23302
   3   4  -488791.00 4097.18   1-0.62231-0.22619 1.65210 1.48180 0.62231 0.16938
  -3  -4   493523.10 4012.95   1-0.19617-0.59219 1.50875 1.67915 0.19617 0.64919
   3   4  -488915.58 4121.38   1-0.98090-0.58528 1.16535 0.99441 0.23496-0.21794
  -3  -4   498820.13 4871.75   1-0.86067-1.25629 0.13961 0.31057-0.70571-0.25279
  -3  -4   471223.95 3667.58   1-0.89933-1.29479-0.29553-0.12710-0.89933-0.44767
   3   4  -493116.26 4305.08   1-0.74548-0.35036-1.61260-1.78125-0.74548-1.19737
  -3  -4   483045.98 4298.57   1-0.89636-1.29156-0.49537-0.32496-0.97681-0.52431
   3   4  -5108617.2 4953.81   1-0.71274-0.25580 1.62863 1.60976 0.71274 0.33770
  -3  -4   5104869.6 4943.23   1-0.29382-0.75075 1.56971 1.58856 0.29382 0.66886
   3   4  -583796.00 4644.68   1-0.95530-0.49933 1.29378 1.27541 0.39288 0.01846
  -3  -4   5108199.3 5283.35   1-0.79649-1.25278-0.05473-0.03512-0.84306-0.46795
  -3  -4   599389.26 4850.39   1-0.79586-1.25195 0.03662 0.05361-0.79586-0.42221
   3   4  -5104652.1 5180.95   1-0.94303-0.48728-1.34164-1.35890-0.94303-1.31698
   3   4  -620006.64 1369.01   1-0.79423-0.27648 1.57912 1.71168 0.79423 0.49708
  -3  -4   617059.11 1568.72   1-0.36790-0.88566 1.60608 1.47352 0.36790 0.66506
   3   4  -6 9667.85 2023.64   1-0.86319-0.34659 1.50262 1.63571 0.69954 0.40298
  -3  -4   614319.76 1379.78   1-0.63097-1.14795-0.44995-0.58166-1.08780-0.79048
  -3  -4   618904.96 1470.65   1-0.71313-1.22985 0.24751 0.11306-0.71313-0.41749
   3   4  -617202.08 1441.59   1-0.99085-0.47447-1.08016-0.94606-0.99085-1.28687
   3   4  -711277.86 1222.59   1-0.86344-0.28487 1.50424 1.78822 0.86344 0.64418
  -3  -4   710954.31 1210.84   1-0.42071-0.99928 1.62636 1.34239 0.42071 0.63998
  -3  -4   710973.33 1091.10   1-0.64412-1.22147 0.40156 0.11567-0.64412-0.42649
   3   4  -710965.25 1106.27   1-0.99394-0.41693-0.90420-0.61869-0.99394-1.21202
   3   4  -837845.37 2210.65   1-0.91849-0.27911 1.40622 1.84161 0.91849 0.77711
  -3  -4   838543.82 2471.90   1-0.58264-1.22061 0.52628 0.08894-0.58264-0.44302
   3   4  -834799.39 2201.97   1-0.98797-0.35033-0.79838-0.36149-0.98797-1.12811
   3   4  -9  147.68  136.76   1-0.95865-0.25844 1.28789 1.87470 0.95865 0.89515
  -3  -4   9  109.87  151.31   1-0.52516-1.22377 0.63407 0.04529-0.52516-0.46355
   3   4 -10 1575.17  471.28   1-0.98388-0.22286 1.15202 1.89025 0.98388 0.99827
  -3  -4  10 1601.10  503.63   1-0.46969-1.22891 0.73111-0.00911-0.46969-0.48609
   3   4 -11 6143.72  757.67   1-0.99448-0.17264 1.00086 1.89051 0.99448 1.08676
  -3  -4  11 5443.28  960.35   1-0.41501-1.23486 0.82075-0.07090-0.41501-0.50943
   3   3   5 4011.84  924.63   1-0.93789-1.14938 1.35113-0.02863 0.46931-0.58494
   3   3   5 4148.42  858.01   1 0.09923-0.11206 1.43459 0.05624 0.09923-0.95562
   3   3   5 3733.21  765.86   1-0.77574-0.98771 1.42656 0.04759 0.37502-0.67872
   3   3   426017.50 2016.58   1-0.95317-1.10404 1.30160 0.07331 0.40307-0.57331
   3   3   425080.77 2159.25   1 0.10679-0.04388 1.44084 0.21392 0.10679-0.87006
   3   3   424311.27 1735.18   1-0.79670-0.94805 1.38340 0.15582 0.33141-0.64454
  -3  -3  -3  124.23  136.80   1 0.16354 0.25270-1.48527-0.40836-0.16354 0.73585
   3   3   3   85.57  121.75   1-0.76985-0.85901-0.10667-1.18361 0.76985-0.12955
   3   3   3  145.28  140.29   1-0.96460-1.05482 1.25574 0.17890 0.34441-0.55410
   3   3   3  256.61  192.19   1 0.13327 0.04323 1.46213 0.38665 0.13327-0.76556
  -3  -3  -3  116.66  160.19   1-0.66344-0.57339 0.36007 1.43557-0.66344 0.23540
   3   3   3   78.54  140.30   1-0.81340-0.90411 1.34631 0.27012 0.29488-0.60326
   3   3   2 1245.40  503.38   1-0.62544-0.65395-0.44057-1.36599 0.62544-0.19595
   3   3   2 1134.72  348.06   1-0.20121-0.23114 1.51223 0.58683 0.20121-0.62002
  -3  -3  -2 1356.14  502.18   1-0.58799-0.55857 0.51583 1.43986-0.58799 0.23284
  -3  -3  -2 1927.28  408.53   1-0.18722-0.15754-1.50245-0.57850-0.18722 0.63336
   3   3   2 1629.20  449.47   1-0.82519-0.85527 1.31849 0.39370 0.26802-0.55232
   3   3   127046.63 2153.15   1-0.45058-0.41843-0.76308-1.53699 0.45058-0.29281
   3   3   126133.82 1891.12   1-0.25996-0.22898 1.55019 0.77621 0.25996-0.48337
   3   3   128233.64 2222.65   1-0.97803-0.94685 1.18470 0.41039 0.25778-0.48525
  -3  -3  -131963.44 1775.13   1-0.93371-0.96489 0.42246 1.19677-0.48571 0.25732
  -3  -3  -130599.87 2037.63   1-0.48685-0.51806 0.70176 1.47436-0.48685 0.25596
  -3  -3  -132270.75 1824.53   1-0.28442-0.31533-1.56447-0.79197-0.28442 0.45822
   3   3   128244.98 1818.16   1-0.83075-0.80020 1.30487 0.53145 0.25502-0.48753
  -3  -3  -131110.89 1851.18   1-0.99480-1.02567 0.36479 1.13844-0.48249 0.26011
   3   3   0  240.99  141.87   1-0.25701-0.16420-1.05072-1.67310 0.25701-0.40838
   3   3   0   25.92   93.24   1-0.33804-0.24625 1.59248 0.96993 0.33804-0.32740
   3   3   0   50.53  109.96   1-0.98072-0.88887 1.16664 0.54367 0.23647-0.42876
  -3  -3   0   35.40   82.66   1-0.33915-0.43099 0.93627 1.55742-0.33915 0.32565
  -3  -3   0   27.29   75.53   1-0.44484-0.53638-1.63396-1.01285-0.44484 0.21987
   3   3   0   56.61   87.16   1-0.82728-0.73610 1.31341 0.69136 0.26315-0.40160
  -3  -3   0   34.00   96.27   1-0.99400-1.08554 0.41924 1.04162-0.44609 0.21873
   3   3  -1 8032.12 1027.84   1-0.06185 0.09161-1.28274-1.75362 0.06185-0.52554
   3   3  -1 8065.17  953.06   1-0.43115-0.27853 1.62978 1.15864 0.43115-0.15641
   3   3  -1 7925.79  969.56   1-0.98063-0.82810 1.16731 0.69566 0.23725-0.35018
  -3  -3   1 8432.50  920.75   1-0.95278-1.10530 0.51891 0.99055-0.40493 0.18250
  -3  -3   1 8829.49  972.00   1-0.10368-0.25615 1.23751 1.70723-0.10368 0.48311
  -3  -3   1 9225.30  984.15   1-0.67857-0.83074-1.64076-1.17101-0.67857-0.09179
   3   3  -1 8419.80 1016.28   1-0.80836-0.65654 1.35779 0.88715 0.30610-0.28086
  -3  -3   1 8875.79 1013.81   1-0.99306-1.14526 0.45315 0.92424-0.42310 0.16393
   3   3  -2100910.6 3602.93   1 0.11724 0.33136-1.44936-1.76875-0.11724-0.62663
   3   3  -291487.77 3079.51   1-0.53262-0.31919 1.65189 1.33218 0.53262 0.02294
   3   3  -298800.64 4069.28   1-0.97638-0.76318 1.19497 0.87466 0.27002-0.23961
  -3  -3   2102787.1 3884.92   1-0.95552-1.16872 0.53422 0.85453-0.39182 0.11782
  -3  -3   295065.85 3672.94   1-0.91338-1.12618-1.41758-1.09922-0.91338-0.40452
   3   3  -297511.91 4373.23   1-0.26520-0.05241-1.55333-1.87169-0.26520-0.77406
   3   3  -2103582.7 3469.25   1-0.75689-0.54444 1.46248 1.14321 0.41233-0.09683
  -3  -3   298905.33 3737.46   1-0.99320-1.20606 0.44909 0.76889-0.42587 0.08338
  -3  -3   378528.89 2967.13   1-0.26774-0.54198 1.55482 1.72312 0.26774 0.69953
   3   3  -382912.78 3551.13   1-0.96300-0.68941 1.26278 1.09470 0.35326-0.07806
  -3  -3   385526.21 4053.90   1-0.95154-1.22542 0.51213 0.68112-0.41070 0.02113
  -3  -3   370089.28 3098.73   1-0.99465-1.26808-0.93446-0.76746-0.99465-0.56373
   3   3  -379605.44 3532.21   1-0.67448-0.40106-1.64192-1.80890-0.67448-1.10539
  -3  -3   373341.91 3856.86   1-0.99484-1.26836 0.35646 0.52497-0.48800-0.05653
   3   3  -437439.71 2198.86   1-0.72963-0.39457 1.62093 1.60405 0.72963 0.37573
  -3  -3   437960.94 2124.35   1-0.38498-0.72004 1.61317 1.63005 0.38498 0.73888
   3   3  -439883.75 2037.69   1-0.92573-0.59150 1.38409 1.36747 0.51536 0.16190
  -3  -3   438204.80 1965.39   1-0.93419-1.26874 0.42471 0.44236-0.48386-0.12982
  -3  -3   437630.74 2239.38   1-0.93868-1.27304-0.46316-0.44776-0.93868-0.58591
   3   3  -435853.78 1964.59   1-0.91043-0.57638-1.42386-1.43945-0.91043-1.26341
   3   3  -427722.71 2746.67   1-0.10011 0.23360 1.87739 1.86089 1.16223 0.80865
   3   3  -542490.98 2347.22   1-0.81251-0.41664 1.56296 1.69750 0.81251 0.53649
   3   3  -532314.91 2835.55   1-0.81088-0.41602 1.56456 1.69939 0.81516 0.53956
  -3  -3   537386.35 2573.79   1-0.87781-1.27304 0.19819 0.06451-0.66214-0.38590
  -3  -3   546359.94 3028.23   1-0.85099-1.24598-0.12712-0.26317-0.85099-0.57624
   3   3  -544573.96 2804.24   1-0.98421-0.58953-1.14935-1.01358-0.98421-1.25926
   3   3  -6 3276.23  490.30   1-0.88025-0.42355 1.47916 1.76511 0.88025 0.68211
  -3  -3   6 2964.34  596.74   1-0.52925-0.98594 1.65151 1.36557 0.52925 0.72739
   3   3  -6 1938.32  718.27   1-0.32821 0.12728 1.59979 1.88610 1.32819 1.13046
  -3  -3   6 2705.32  610.02   1-0.76818-1.22379 0.11105-0.17642-0.76818-0.57143
   3   3  -6 2910.59  599.05   1-0.99479-0.53949-0.94636-0.65920-0.99479-1.19191
   3   3  -7 7311.64  829.78   1-0.93186-0.41435 1.37340 1.81077 0.93186 0.81161
  -3  -3   7 6800.88  909.98   1-0.56628-1.08379 1.65433 1.21696 0.56628 0.68653
  -3  -3   7 7368.72 1027.58   1-0.69403-1.21027 0.29185-0.14708-0.69403-0.57529
   3   3  -7 6435.45  939.71   1-0.98950-0.47357-0.81850-0.37995-0.98950-1.10868
   3   3  -8 5959.79  873.75   1-0.96760-0.38928 1.24966 1.83845 0.96760 0.92524
  -3  -3   8 5573.19  952.43   1-0.62640-1.20326 0.43861-0.15177-0.62640-0.58568
   3   3  -8 5557.35  990.64   1-0.98309-0.40653-0.74545-0.15551-0.98309-1.02434
  -3  -3   8 2640.10  996.40   1-0.39625-0.97251 1.83537 1.24629 0.91952 0.96190
   3   3  -9  344.42  210.16   1-0.98830-0.34916 1.11128 1.85150 0.98830 1.02383
  -3  -3   9  289.44  242.91   1-0.56300-1.20050 0.56398-0.17783-0.56300-0.60029
  -3  -3   9  172.34  203.07   1-0.50814-1.14503 1.76728 1.02682 0.79347 0.75805
   3   3 -1025681.70 1588.04   1-0.99487-0.29491 0.96072 1.85233 0.99487 1.10828
  -3  -3  1027137.99 1985.27   1-0.50213-1.20026 0.67512-0.21812-0.50213-0.61743
   3   3 -11 1048.54  333.63   1-0.98806-0.22728 0.79950 1.84254 0.98806 1.17936
  -3  -3  11  948.40  427.03   1-0.44261-1.20135 0.77621-0.26847-0.44261-0.63591
   3   2   6  384.88  240.04   1-0.90252-1.23575 1.43609 0.05807 0.59198-0.44131
   3   2   6  366.46  309.68   1 0.08517-0.24785 1.42275 0.04597 0.08517-0.94880
   3   2   512007.16 1381.96   1-0.92234-1.19493 1.39249 0.16592 0.52738-0.42804
   3   2   512584.38 1454.02   1 0.08441-0.18799 1.42211 0.19678 0.08441-0.87155
   3   2   511359.04 1307.12   1-0.75435-1.02737 1.46713 0.24128 0.41723-0.53768
   3   2   420515.35 1882.26   1-0.88195-1.09299 0.23143-0.84370 0.88195 0.00348
   3   2   423760.65 1941.31   1-0.93757-1.14953 1.35208 0.27697 0.47061-0.40695
   3   2   422458.26 2017.80   1 0.09862-0.11314 1.43409 0.36020 0.09862-0.77933
   3   2   422899.11 1843.28   1-0.77130-0.98369 1.43526 0.36079 0.38396-0.49316
   3   2   3  597.73  309.35   1-0.74984-0.90023-0.15807-1.08169 0.74984-0.05061
   3   2   3  512.43  265.33   1-0.19937-0.35117 1.51098 0.58757 0.19937-0.60070
   3   2   3  716.93  331.75   1-0.94871-1.10003 1.31725 0.39359 0.42363-0.37607
   3   2   3  624.19  334.58   1 0.13423-0.01691 1.46288 0.54044 0.13423-0.66571
  -3  -2  -3  626.18  264.03   1-0.55148-0.40033 0.58568 1.50811-0.55148 0.24846
   3   2   3  631.66  275.60   1-0.78268-0.93444 1.41267 0.48960 0.36084-0.43847
   3   2   2  816.80  365.96   1-0.56263-0.65237-0.56468-1.33678 0.56263-0.15982
   3   2   2  793.56  345.37   1-0.26058-0.35148 1.55055 0.77856 0.26058-0.46162
  -3  -2  -2  867.86  305.90   1-0.96319-0.87262 0.57989 1.35225-0.35222 0.36974
  -3  -2  -2  936.17  355.52   1-0.44588-0.35536 0.77084 1.54185-0.44588 0.27605
  -3  -2  -2  974.19  352.21   1-0.20110-0.11032-1.51217-0.74124-0.20110 0.52059
   3   2   2  867.31  375.47   1-0.78688-0.87801 1.40407 0.63238 0.35213-0.36939
   3   2   1110753.7 5108.08   1-0.33052-0.35960-0.94879-1.56939 0.33052-0.31393
   3   2   1111684.4 5483.23   1-0.34601-0.37609 1.59625 0.97569 0.34601-0.29830
   3   2   1132256.3 5272.05   1-0.95951-0.98956 1.27739 0.65667 0.37180-0.27215
  -3  -2  -1128514.2 4996.51   1-0.97593-0.94603 0.66855 1.28955-0.27324 0.37091
  -3  -2  -1129844.8 5718.72   1-0.30024-0.27035 0.99180 1.61137-0.30024 0.34368
  -3  -2  -1127395.8 5475.41   1-0.31611-0.28595-1.58157-0.96213-0.31611 0.32763
   3   2   1119091.7 5194.22   1-0.78069-0.81118 1.41668 0.79639 0.36493-0.27879
  -3  -2  -1128707.3 5420.74   1-0.97894-0.94879 0.66688 1.28736-0.27225 0.37154
   3   2   0  246.14  161.22   1-0.08020-0.04862-1.26320-1.73227 0.08020-0.48624
   3   2   0  238.71  197.65   1-0.44945-0.41871 1.63530 1.16613 0.44945-0.11698
   3   2   0  269.31  157.28   1-0.95835-0.92777 1.28201 0.81276 0.37772-0.18837
  -3  -2   0  253.39  196.53   1-0.98473-1.01550 0.74747 1.21713-0.20042 0.36593
  -3  -2   0  305.17  172.15   1-0.08802-0.11876 1.25473 1.72285-0.08802 0.47789
  -3  -2   0  263.99  169.43   1-0.49639-0.52686-1.64643-1.17836-0.49639 0.06942
   3   2   0  327.38  188.10   1-0.75711-0.72698 1.46206 0.99316 0.41190-0.15402
  -3  -2   0  243.61  166.45   1-0.96656-0.99670 0.77116 1.24007-0.19468 0.37124
   3   2  -111335.85 1080.42   1 0.15349 0.24572-1.47773-1.79530-0.15349-0.64193
   3   2  -111484.78 1101.45   1-0.56098-0.46942 1.65413 1.33638 0.56098 0.07243
   3   2  -112500.14 1075.47   1-0.95010-0.85889 1.31248 0.99468 0.41733-0.07090
  -3  -2   111671.33 1155.59   1-0.99014-1.08159 0.81397 1.13231-0.13708 0.35148
  -3  -2   112171.58 1134.94   1-0.73374-0.82484-1.61888-1.30220-0.73374-0.24586
   3   2  -112219.66 1352.33   1-0.21926-0.12822-1.52444-1.84117-0.21926-0.70716
   3   2  -112398.52 1171.86   1-0.69935-0.60858 1.55796 1.24044 0.51693 0.02880
  -3  -2   111938.14 1279.67   1-0.95003-1.04080 0.87658 1.19410-0.11332 0.37480
  -3  -2   2  190.43  151.49   1-0.34470-0.49706 1.59565 1.76197 0.34470 0.75536
   3   2  -2  101.36  113.26   1-0.92795-0.77610 1.37842 1.21208 0.50731 0.09694
  -3  -2   2   97.37  113.52   1-0.99288-1.14502 0.86322 1.03024-0.08891 0.32185
  -3  -2   2   88.47  102.85   1-0.93491-1.08664-1.36516-1.19986-0.93491-0.52496
   3   2  -2   73.22  113.19   1-0.58448-0.43276-1.65451-1.81980-0.58448-0.99443
   3   2  -2   69.78  104.13   1-0.56092-0.40952 1.72277 1.55661 0.72587 0.31553
  -3  -2   2   80.46  103.20   1-0.92764-1.07904 0.98844 1.15457-0.02349 0.38684
   3   2  -335711.23 1774.30   1-0.76607-0.55289 1.60001 1.58510 0.76607 0.43330
  -3  -2   337452.18 1765.38   1-0.48536-0.69854 1.64421 1.65911 0.48536 0.81813
   3   2  -330292.42 1708.39   1-0.87307-0.66058 1.48788 1.47301 0.67456 0.34206
  -3  -2   337824.08 2357.70   1-0.99375-1.20656 0.88553 0.90121-0.06673 0.26622
  -3  -2   335315.67 2000.76   1-0.99461-1.20696-0.93217-0.91824-0.99461-0.66259
   3   2  -335855.87 2111.51   1-0.85464-0.64229-1.51610-1.53002-0.85464-1.18666
   3   2  -335296.37 1886.55   1-0.19852 0.01351 1.88338 1.86861 1.09470 0.76216
  -3  -2   330694.62 2310.08   1-0.89423-1.10626 1.11937 1.13413 0.08690 0.41944
   3   2  -4  133.15  108.28   1-0.84582-0.57181 1.52720 1.66370 0.84582 0.59093
  -3  -2   4  122.67  127.95   1-0.58121-0.85521 1.65452 1.51803 0.58121 0.83610
   3   2  -4   95.24  141.52   1-0.73051-0.45739 1.62322 1.75980 0.95511 0.70047
  -3  -2   4  124.48  132.35   1-0.99261-1.26609 0.85723 0.72158-0.09483 0.16033
  -3  -2   4  141.74  158.42   1-0.94955-1.22280-0.51796-0.65560-0.94955-0.69567
   3   2  -4  115.95  135.58   1-0.96741-0.69442-1.25058-1.11314-0.96741-1.22149
  -3  -2   4   97.12  138.42   1-0.63517-0.90833-1.20726-1.34324-1.25539-1.00054
   3   2  -524804.86 1515.23   1-0.90730-0.57248 1.43033 1.71826 0.90730 0.73030
   3   2  -519794.81 1838.83   1-0.32842 0.00533 1.59989 1.88794 1.32808 1.15131
  -3  -2   522656.14 1734.51   1-0.97925-1.31341 0.69582 0.40883-0.24835-0.07099
  -3  -2   527384.49 2042.16   1-0.87273-1.20660-0.19919-0.48826-0.87273-0.69686
   3   2  -524278.39 1686.77   1-0.99389-0.66028-1.02218-0.73335-0.99389-1.17004
   3   2  -620039.61 1449.90   1-0.95124-0.55561 1.31502 1.75437 0.95124 0.85213
  -3  -2   619683.10 1550.98   1-0.67892-1.07456 1.64066 1.20131 0.67892 0.77803
  -3  -2   618887.85 1768.96   1-0.79381-1.18832 0.04230-0.39822-0.79381-0.69595
   3   2  -616846.24 1613.36   1-0.99249-0.59825-0.86783-0.42761-0.99249-1.09070
  -3  -2   6 9073.12 2451.48   1-0.90796-1.30190 1.06942 0.63004 0.04408 0.14323
   3   2  -610487.66 1792.16   1-0.19887 0.19575-1.74658-1.30822-1.29331-1.39265
   3   2  -740718.39 2375.20   1-0.97922-0.52277 1.18581 1.77656 0.97922 0.95799
  -3  -2   736962.86 2446.57   1-0.69712-1.15357 1.63471 1.04394 0.69712 0.71835
  -3  -2   737945.08 2463.96   1-0.71940-1.17454 0.23265-0.35931-0.71940-0.69955
   3   2  -735490.06 2149.07   1-0.98591-0.53105-0.77442-0.18281-0.98591-1.00618
   3   2  -732822.56 2830.80   1-0.51014-0.05500-1.41485-0.82501-1.30115-1.32266
   3   2  -8 5259.41  680.90   1-0.99291-0.47564 1.04590 1.78808 0.99291 1.04956
  -3  -2   8 4684.91  777.30   1-0.64964-1.16541 0.38983-0.35357-0.64964-0.70780
  -3  -2   8 2187.21  792.89   1-0.81681-1.33202 1.33841 0.59623 0.28721 0.23075
   3   2  -9   47.92  103.76   1-0.99372-0.41564 0.89739 1.79099 0.99372 1.12827
  -3  -2   9   25.89  111.88   1-0.58337-1.15977 0.52485-0.37000-0.58337-0.71955
  -3  -2   9   10.24   94.90   1-0.77367-1.34950 1.43062 0.53705 0.37919 0.24494
   3   2 -10  589.04  233.91   1-0.98266-0.34376 0.74134 1.78636 0.98266 1.19509
  -3  -2  10  541.03  275.63   1-0.51940-1.15643 0.64444-0.40185-0.51940-0.73359
   3   1   730385.96 2139.44   1-0.85159-1.30657 1.51851 0.14223 0.72740-0.28493
   3   1   730567.12 2503.06   1 0.08413-0.37062 1.42186 0.04668 0.08413-0.92896
   3   1   732303.37 2268.88   1-0.68077-1.13611 1.58489 0.20940 0.54813-0.46354
   3   1   6 2171.67  595.58   1-0.87625-1.27058 1.48291 0.25808 0.66628-0.26819
   3   1   6 2152.24  579.95   1 0.07767-0.31646 1.41632 0.19259 0.07767-0.85741
   3   1   5 3594.44  709.74   1-0.98190-1.31631 0.73415-0.33872 0.98190 0.12504
   3   1   5 2851.31  644.60   1-0.20064-0.53511 1.51184 0.43906 0.20064-0.65616
   3   1   5 4016.66  795.79   1-0.89535-1.22906 1.44996 0.37660 0.61339-0.24321
   3   1   5 4128.49  770.76   1 0.08360-0.24990 1.42141 0.34911 0.08360-0.77347
   3   1   5 3521.68  647.58   1-0.71956-1.05364 1.52663 0.45391 0.48164-0.37444
   3   1   412525.62 1513.48   1-0.90424-1.17651 0.31454-0.60727 0.90424 0.12472
   3   1   411861.40 1369.08   1-0.23101-0.50459 1.53213 0.61068 0.23101-0.54795
   3   1   414550.63 1450.61   1-0.90931-1.18237 1.42211 0.50020 0.57084-0.20790
   3   1   415431.11 1707.25   1 0.10666-0.16621 1.44074 0.51989 0.10666-0.67240
  -3  -1  -416125.03 1432.22   1-0.53476-0.26188 0.61659 1.53745-0.53476 0.24430
   3   1   413937.02 1288.53   1-0.72986-1.00330 1.50978 0.58844 0.46308-0.31521
   3   1   328562.58 1922.44   1-0.74007-0.95169-0.18246-0.95276 0.74007 0.03855
   3   1   322910.60 1691.77   1-0.29653-0.50930 1.57118 0.80116 0.29653-0.40454
   3   1   331699.17 2188.34   1-0.91819-1.13062 1.40236 0.63192 0.54167-0.15919
  -3  -1  -332534.34 1730.74   1-0.98193-0.76961 0.71985 1.49022-0.22618 0.47470
   3   1   330183.30 2113.86   1 0.15438-0.05786 1.47841 0.70900 0.15438-0.54667
  -3  -1  -332640.36 2030.17   1-0.43031-0.21806 0.79625 1.56566-0.43031 0.27074
   3   1   331038.17 2386.08   1-0.73187-0.94468 1.50643 0.73648 0.45941-0.24107
  -3  -1  -332936.58 1842.65   1-0.97253-0.76005 0.72485 1.49469-0.22947 0.47107
   3   1   2  249.26  183.31   1-0.47697-0.62794-0.71873-1.33750 0.47697-0.14653
   3   1   2  215.79  215.62   1-0.39318-0.54513 1.61640 0.99780 0.39318-0.23000
  -3  -1  -2  259.40  143.42   1-0.99154-0.83989 0.83656 1.45561-0.11513 0.50796
  -3  -1  -2  240.83  175.22   1-0.29228-0.14065 1.00286 1.62084-0.29228 0.33076
  -3  -1  -2  239.98  199.10   1-0.23811-0.08625-1.53668-0.91889-0.23811 0.38467
   3   1   2  196.58  161.13   1-0.72194-0.87411 1.52280 0.90424 0.47740-0.14529
   3   1   116031.89 1615.29   1-0.14555-0.23585-1.18982-1.65711 0.14555-0.39996
   3   1   113676.17 1256.40   1-0.51006-0.60119 1.64883 1.18164 0.51006-0.03524
   3   1   118596.08 1295.87   1-0.91766-1.00882 1.40358 0.93607 0.54346-0.00168
  -3  -1  -118649.67 1200.61   1-0.99487-0.90390 0.94838 1.41608-0.00293 0.54235
  -3  -1  -118194.71 1522.14   1-0.10245-0.01146 1.23888 1.70540-0.10245 0.44257
  -3  -1  -118281.38 1420.45   1-0.37416-0.28293-1.60873-1.14233-0.37416 0.17069
   3   1   117926.92 1457.02   1-0.69269-0.78423 1.56782 1.10064 0.52825-0.01664
   3   1   0 1293.33  462.14   1-0.63059-0.66091 1.65104 1.33526 0.63059 0.16317
   3   1   0 1387.35  374.74   1-0.90286-0.93338 1.43542 1.11936 0.59096 0.12368
  -3  -1   0 1272.64  349.93   1-0.99182-0.96152 1.05496 1.37134 0.11016 0.57765
  -3  -1   0 1373.66  394.70   1 0.15948 0.18985 1.48223 1.79734 0.15948 0.62651
  -3  -1   0 1362.57  414.23   1-0.57229-0.54169-1.65447-1.33945-0.57229-0.10537
   3   1   0 1430.04  397.44   1-0.62812-0.65903 1.65249 1.33669 0.63084 0.16374
  -3  -1   0 1386.81  484.29   1-0.87758-0.84667 1.17436 1.49016 0.13516 0.60227
   3   1  -128796.32 1990.67   1-0.73946-0.70896 1.61591 1.45156 0.73946 0.34993
  -3  -1   131477.73 1936.63   1-0.43118-0.46167 1.62979 1.79415 0.43118 0.82071
   3   1  -129236.29 1999.85   1-0.86804-0.83793 1.49553 1.33094 0.68742 0.29801
  -3  -1   127483.36 1521.96   1-0.98221-1.01259 1.15572 1.32077 0.22372 0.61341
  -3  -1   131479.12 1946.72   1-0.80008-0.83010-1.57420-1.41056-0.80008-0.41109
   3   1  -133072.09 1980.24   1-0.48245-0.45243-1.64358-1.80721-0.48245-0.87143
   3   1  -129734.13 1644.83   1-0.49127-0.46154 1.77971 1.61530 0.81391 0.42461
  -3  -1   132329.92 1967.78   1-0.80506-0.83478 1.36517 1.52959 0.31334 0.70265
  -3  -1   242081.23 2150.55   1-0.59845-0.68976 1.65406 1.66700 0.59845 0.91010
   3   1  -238854.10 2116.25   1-0.79198-0.70123 1.58168 1.56854 0.85151 0.53996
  -3  -1   242148.06 2112.33   1-0.96559-1.05633 1.25130 1.26444 0.33885 0.65040
  -3  -1   247751.95 2062.01   1-0.95895-1.04961-1.28671-1.27445-0.95895-0.64790
   3   1  -241408.38 2417.89   1-0.77183-0.68118-1.59610-1.60836-0.77183-1.08289
   3   1  -238516.85 1968.32   1-0.20085-0.11050 1.88328 1.87027 1.09294 0.78144
  -3  -1   234309.74 1874.70   1-0.67586-0.76622 1.59172 1.60476 0.55619 0.86770
   3   1  -360197.88 2182.67   1-0.89550-0.74337 1.45309 1.59157 0.89550 0.66174
  -3  -1   365733.32 2360.54   1-0.69964-0.85176 1.63379 1.49530 0.69964 0.93339
   3   1  -365778.90 2738.81   1-0.62628-0.47490 1.65726 1.79558 1.09320 0.85952
  -3  -1   362465.16 2544.13   1-0.94252-1.09389 1.33725 1.19893 0.45040 0.68409
  -3  -1   368211.87 2601.40   1-0.99330-1.14459-0.88625-1.02538-0.99330-0.76019
   3   1  -368422.24 3297.43   1-0.93209-0.78081-1.37278-1.23366-0.93209-1.16521
  -3  -1   359647.94 2733.67   1-0.42652-0.57750 1.82018 1.68182 0.88755 1.12126
  -3  -1   355369.74 3151.26   1-0.32303-0.47451-1.64089-1.77878-1.31396-1.08013
   3   1  -473609.64 2686.71   1-0.94302-0.73007 1.34168 1.63159 0.94302 0.78715
  -3  -1   477407.31 2853.75   1-0.75754-0.97048 1.60548 1.31558 0.75754 0.91341
   3   1  -478244.01 2586.44   1-0.27959-0.06757 1.57469 1.86446 1.35027 1.19445
  -3  -1   474091.61 3048.94   1-0.94884-1.16099-0.51424-0.80491-0.94884-0.79386
   3   1  -474070.17 3109.62   1-0.98633-0.77443-1.13086-0.84037-0.98633-1.14152
  -3  -1   477185.10 3065.09   1-0.02458-0.23620 1.86025 1.57049 1.20580 1.36170
  -3  -1   468710.39 3469.32   1-0.81876-1.03090-0.77070-1.05986-1.10156-0.94551
   3   1  -550553.53 2224.47   1-0.97375-0.69999 1.21856 1.65988 0.97375 0.89576
  -3  -1   539989.75 2857.24   1-0.88367-1.15632 1.47073 1.02948 0.64638 0.72433
  -3  -1   542827.25 2899.73   1-0.30344-0.57652-1.00723-1.44751-1.33993-1.26144
  -3  -1   548921.41 3093.42   1-0.87766-1.15043-0.21631-0.65842-0.87766-0.80069
   3   1  -548668.46 2364.12   1-0.99482-0.72228-0.94881-0.50692-0.99482-1.07207
  -3  -1   536548.26 2906.74   1-0.98295-1.25574 0.05214-0.38832-0.67954-0.60128
   3   1  -539429.46 2333.92   1-0.34524-0.07244-1.61850-1.17806-1.31536-1.39363
   3   1  -6 1750.80  382.13   1-0.99033-0.65576 1.08722 1.67996 0.99033 0.99023
  -3  -1   6 1651.05  376.61   1-0.80175-1.13631 1.57276 0.98001 0.80175 0.80184
  -3  -1   6 1061.09  554.30   1-0.86481-1.19856 0.15343-0.43821-0.69553-0.69485
  -3  -1   6 1490.21  442.61   1-0.80208-1.13548 0.01927-0.57428-0.80208-0.80312
   3   1  -6 1500.34  440.82   1-0.99035-0.65719-0.83077-0.23749-0.99035-0.98966
  -3  -1   6 1395.23  580.98   1-0.98920-1.32265 0.53781-0.05395-0.36461-0.36413
   3   1  -6 1659.02  474.16   1-0.55692-0.22346-1.34341-0.75164-1.28813-1.28859
   3   1  -720769.64 1355.69   1-0.99482-0.59943 0.94967 1.69382 0.99482 1.07261
  -3  -1   722162.61 1548.82   1-0.80309-1.19848 1.57158 0.82742 0.80309 0.72530
  -3  -1   720295.32 1994.53   1-0.72857-1.12260 0.21061-0.53438-0.72857-0.80762
   3   1  -719841.76 1456.61   1-0.98473-0.59094-0.76183-0.01718-0.98473-0.90610
  -3  -1   715625.15 1914.21   1-0.95768-1.35119 0.83113 0.08721-0.14878-0.22626
   3   1  -721279.40 1603.58   1-0.65954-0.26542-1.16000-0.41694-1.24201-1.16469
   3   1  -827650.46 1611.94   1-0.98864-0.53243 0.80688 1.70245 0.98864 1.14432
  -3  -1   825713.78 2321.03   1-0.65820-1.11285 0.37146-0.52498-0.65820-0.81525
  -3  -1   821468.25 2386.98   1-0.91597-1.37012 1.03794 0.14266 0.01755-0.13772
   3   1  -916888.60 1363.11   1-0.97267-0.45565 0.65917 1.70617 0.97267 1.20624
  -3  -1   916736.10 1503.04   1-0.59047-1.10576 0.51095-0.53692-0.59047-0.82554
  -3  -1   914968.20 1747.01   1-0.87010-1.38488 1.19740 0.15072 0.15575-0.07732
   3   1 -1010584.99 1061.49   1-0.94692-0.37002 0.50425 1.70358 0.94692 1.25945
  -3  -1  10 9441.09 1188.87   1-0.52462-1.10054 0.63503-0.56428-0.52462-0.83770
  -3  -1  10 8509.60 1510.50   1-0.82084-1.39626 1.32894 0.13086 0.27805-0.03283
   3   0   7  749.88  371.23   1-0.81099-1.32707 1.56445 0.34137 0.81494-0.09857
   3   0   7  747.54  341.22   1 0.08314-0.43272 1.42102 0.19887 0.08314-0.83106
   3   0   7  774.49  353.56   1-0.64179-1.15819 1.63610 0.41371 0.61012-0.30273
   3   0   620168.68 2300.09   1-0.33925-0.79554 1.59306 0.52218 0.33925-0.49647
   3   0   631258.86 2644.04   1-0.83380-1.28925 1.54033 0.46872 0.76751-0.06813
   3   0   630078.67 2294.13   1 0.08337-0.37186 1.42121 0.35052 0.08337-0.75282
   3   0   630390.73 2550.84   1-0.65778-1.11354 1.61593 0.54493 0.58524-0.24981
   3   0   5 8021.22 1277.93   1-0.35607-0.75153 1.60087 0.68139 0.35607-0.40176
   3   0   514284.31 1469.61   1-0.85007-1.24487 1.52050 0.60035 0.73096-0.02682
   3   0   513248.31 1612.12   1 0.09791-0.29670 1.43350 0.51424 0.09791-0.66027
   3   0   431772.75 2360.59   1-0.96302-1.29653 0.59475-0.17377 0.96302 0.28244
   3   0   450366.51 2409.55   1-0.85957-1.19375 1.50773 0.73903 0.70839 0.02847
  -3   0  -439459.94 2798.44   1-0.99168-0.65762 0.83917 1.60759-0.11257 0.56724
   3   0   446081.36 2754.37   1 0.13239-0.20159 1.46144 0.69362 0.13239-0.54778
  -3   0  -449953.95 2338.73   1-0.43231-0.09832 0.79300 1.56082-0.43231 0.24786
   3   0   444887.13 2918.69   1-0.66560-1.00010 1.60564 0.83741 0.57280-0.10666
  -3   0  -451555.79 2219.04   1-0.95495-0.62046 0.84790 1.61612-0.13575 0.54370
   3   0   3 4242.10  906.02   1-0.76173-1.03457-0.12779-0.74479 0.76173 0.15915
   3   0   3 4304.72  819.05   1-0.54152-0.81535 1.65279 1.03618 0.54152-0.06053
   3   0   3 6263.10  984.61   1-0.86129-1.13483 1.50532 0.88808 0.70420 0.10215
  -3   0  -3 6583.73  744.50   1-0.99467-0.72128 0.97858 1.59566 0.02846 0.63048
  -3   0  -3 6392.05  827.97   1-0.30382-0.03047 0.98679 1.60316-0.30382 0.29833
  -3   0  -3 6369.64  826.30   1-0.19505 0.07850-1.50797-0.89172-0.19505 0.40678
   3   0   3 6187.79  885.60   1-0.65133-0.92519 1.62418 1.00737 0.59536-0.00629
  -3   0  -3 6923.18  754.17   1-0.92315-0.64930 1.00805 1.62489-0.00733 0.59433
   3   0   2 5297.27  886.84   1-0.32695-0.53914-0.95394-1.41942 0.32695-0.19761
   3   0   2 4888.21  932.72   1-0.66615-0.87917 1.64412 1.17891 0.66615 0.14198
  -3   0  -2 8056.60  835.11   1-0.98708-0.77436 1.11397 1.57971 0.17579 0.70000
  -3   0  -2 7762.49  861.95   1-0.13426 0.07846 1.20292 1.66786-0.13426 0.38989
  -3   0  -2 7652.02 1296.55   1-0.29931-0.08638-1.57269-1.10797-0.29931 0.22457
   3   0   2 7202.00  950.62   1-0.61620-0.82942 1.66620 1.20073 0.64851 0.12464
  -3   0  -2 7741.76  833.22   1-0.87572-0.66249 1.18019 1.64566 0.14036 0.66423
   3   0   1 3017.76  609.84   1-0.77513-0.92733 1.59377 1.27999 0.77513 0.32885
   3   0   1 4171.65  777.80   1-0.82900-0.98127 1.54576 1.23144 0.77785 0.33153
  -3   0  -1 4567.75  601.94   1-0.96699-0.81473 1.24478 1.55910 0.33073 0.77706
  -3   0  -1 4400.01  700.20   1 0.09163 0.24373 1.42823 1.74173 0.09163 0.53778
  -3   0  -1 4158.99  694.59   1-0.45715-0.30484-1.63741-1.32405-0.45715-0.01119
   3   0   1 3814.97  704.08   1-0.54573-0.69832 1.73647 1.42240 0.74591 0.29984
   3   0   0 3003.89  566.13   1-0.85767-0.94905 1.51211 1.34974 0.85767 0.48927
  -3   0   0 3430.71  585.11   1-0.53541-0.44403 1.65221 1.81458 0.53541 0.90381
   3   0   0 2948.35  618.71   1-0.77948-0.87111 1.59177 1.42891 0.87428 0.50582
  -3   0   0 3157.65  527.54   1-0.93177-0.84014 1.36832 1.53118 0.49311 0.86157
   3   0   0 3292.78  753.43   1-0.37489-0.46656-1.60904-1.77101-0.37489-0.74291
   3   0   0 3260.27  758.65   1-0.41180-0.50376 1.82785 1.66517 0.90328 0.53501
  -3   0   0 3523.06  605.32   1-0.69188-0.59992 1.56900 1.73168 0.52961 0.89788
   3   0  -1  750.83  314.12   1-0.91579-0.94636 1.41229 1.40133 0.91579 0.62528
  -3   0   1  791.63  293.23   1-0.72691-0.69634 1.62226 1.63322 0.72691 1.01742
   3   0  -1  853.70  303.29   1-0.68400-0.71499 1.64320 1.63180 1.02168 0.73109
   3   0  -1  926.58  387.72   1-0.66463-0.69568-1.64449-1.65509-0.66463-0.95472
   3   0  -1  866.85  293.21   1-0.16756-0.19888 1.88352 1.87224 1.11728 0.82681
  -3   0   1  877.50  323.34   1-0.51221-0.48088 1.76414 1.77545 0.78846 1.07894
  -3   0   2241333.0 5819.62   1-0.82077-0.85102 1.55492 1.41446 0.82077 1.03340
   3   0  -2232792.5 5204.01   1-0.50798-0.47833 1.65699 1.79705 1.20974 0.99701
  -3   0   2237470.2 4697.17   1-0.80089-0.83054 1.57389 1.43385 0.83467 1.04741
   3   0  -2262082.2 6202.76   1-0.86980-0.84022-1.49516-1.35435-0.86980-1.08194
  -3   0   2258750.8 6853.96   1-0.23806-0.26736 1.88041 1.74033 1.06403 1.27672
  -3   0   2260704.6 5121.79   1-0.21513-0.24504-1.73454-1.87438-1.29720-1.08449
   3   0  -339131.16 1802.83   1-0.97908-0.88801 1.18671 1.47859 0.97908 0.84434
  -3   0   342872.86 1765.67   1-0.86569-0.95675 1.50109 1.20920 0.86569 1.00042
   3   0  -330140.32 1783.40   1-0.21280-0.12252 1.53420 1.82571 1.37441 1.23954
  -3   0   336436.20 2332.42   1-0.69928-0.78956 1.63756 1.34604 1.00077 1.13564
   3   0  -338685.78 2126.96   1-0.96423-0.87403-1.26487-0.97271-0.96423-1.09845
  -3   0   339138.77 3043.54   1 0.09708 0.00714 1.81013 1.51865 1.26119 1.39607
  -3   0   334924.42 2436.97   1-0.62405-0.71451-1.22801-1.51908-1.26098-1.12595
   3   0  -410042.53  994.87   1-0.99175-0.83987 1.06669 1.50999 0.99175 0.93490
  -3   0   4 9560.19  969.07   1-0.88578-1.03767 1.47009 1.02680 0.88578 0.94263
  -3   0   4 9801.06 1095.91   1-0.57821-0.72912 1.66141 1.21840 1.14495 1.20193
  -3   0   4 8640.03 1002.48   1-0.18783-0.33916-1.15816-1.60046-1.38165-1.32429
   3   0  -4 9764.65 1022.65   1-0.99208-0.84125-1.06119-0.61765-0.99208-1.04837
  -3   0   4 8231.93 1162.59   1-0.87768-1.02880-0.57039-1.01276-1.01259-0.95535
   3   0  -4 9798.83 1082.10   1-0.38149-0.23037-1.57956-1.13720-1.31607-1.37330
   3   0  -5145805.1 5633.70   1-0.99476-0.78206 0.94309 1.53780 0.99476 1.01580
  -3   0   5121170.4 5736.54   1-0.89203-1.10473 1.45934 0.86462 0.89203 0.87099
  -3   0   5104189.3 5049.66   1-0.45452-0.66607 1.64635 1.05192 1.25154 1.23067
   3   0  -5119151.3 5103.57   1-0.99429-0.78282-0.91652-0.32157-0.99429-0.97263
  -3   0   5130415.1 5779.16   1-0.97557-1.18735-0.02766-0.62133-0.72667-0.74722
   3   0  -5132921.3 6002.86   1-0.56042-0.34864-1.33777-0.74410-1.28697-1.26640
   3   0  -644043.71 2104.97   1-0.98933-0.71581 0.81606 1.56219 0.98933 1.08825
  -3   0   643211.62 2355.80   1-0.88936-1.16287 1.46400 0.71787 0.88936 0.79044
  -3   0   637639.05 2273.49   1-0.35111-0.62330 1.61029 0.86441 1.31642 1.21770
  -3   0   628656.23 2667.91   1-0.84813-1.12081 0.09884-0.64609-0.73544-0.83364
   3   0  -637804.97 2210.40   1-0.98996-0.71786-0.82494-0.07862-0.98996-0.89037
  -3   0   639168.17 2737.92   1-0.99480-1.26724 0.36483-0.38014-0.48246-0.58081
   3   0  -637445.58 2280.74   1-0.65796-0.38552-1.16315-0.41819-1.24293-1.14459
   3   0  -713428.25 1158.04   1-0.97616-0.64183 0.68548 1.58303 0.97616 1.15296
  -3   0   713394.29 1268.31   1-0.87995-1.21428 1.47963 0.58208 0.87995 0.70314
  -3   0   711091.34 1461.99   1-0.28455-0.61737 1.57741 0.68004 1.34818 1.17158
  -3   0   7 9497.45 1352.60   1-0.97078-1.30413 0.63021-0.26606-0.30775-0.48374
  -3   0   710646.14 1465.79   1-0.98033-1.31342 0.65269-0.24356-0.28260-0.45873
   3   0  -712151.91 1580.22   1-0.70764-0.37454-1.05867-0.16243-1.21028-1.03416
   3   0  -8 3916.96  627.07   1-0.95528-0.56092 0.54919 1.59880 0.95528 1.21074
  -3   0   8 2642.02  603.72   1-0.26137-0.65484 1.56431 0.51548 1.35754 1.10307
  -3   0   8 3029.80  784.51   1-0.99334-1.38736 1.02542-0.02219 0.07815-0.17564
  -3   0   8 3200.96  744.61   1-0.95068-1.34379 0.87290-0.17551-0.11622-0.37033
   3   0  -911864.16 1306.71   1-0.92726-0.47225 0.41036 1.61149 0.92726 1.26074
  -3   0   910644.22 1357.11   1-0.91212-1.36585 1.05332-0.14647 0.03047-0.30144
   3   0 -10 2194.49  455.02   1-0.89169-0.37601 0.26678 1.61940 0.89169 1.30315
  -3   0  10 1730.79  556.04   1-0.51978-1.03460 0.64375-0.70861-0.51978-0.93176
  -3   0  10 1679.92  641.72   1-0.86738-1.38174 1.20553-0.14566 0.16307-0.24663
   3  -1   8 2094.34  637.93   1-0.72304-1.36085 1.62702 0.40569 0.96642 0.07386
   3  -1   8 2358.10  672.49   1 0.09845-0.53915 1.43394 0.21340 0.09845-0.79487
   3  -1   8 2235.14  682.43   1-0.57089-1.20896 1.71335 0.49271 0.71244-0.17938
   3  -1   715311.29 1494.58   1-0.74942-1.32660 1.61249 0.54260 0.92536 0.11066
   3  -1   714988.76 1627.94   1 0.09472-0.48225 1.43083 0.36170 0.09472-0.72059
   3  -1   714881.38 1466.07   1-0.58584-1.16328 1.69862 0.62935 0.69188-0.12214
   3  -1   622136.13 2071.63   1-0.76743-1.28398 1.60065 0.68224 0.89535 0.15852
   3  -1   620244.48 1754.04   1 0.10334-0.41299 1.43800 0.52034 0.10334-0.63396
   3  -1   620764.99 1735.69   1-0.59250-1.10931 1.69180 0.77392 0.68256-0.05366
   3  -1   5 1479.12  459.14   1-0.77661-1.23253 1.59396 0.82700 0.87937 0.22041
  -3   1  -5 1346.04  366.04   1-0.99481-0.53899 0.93602 1.70246-0.01563 0.64310
   3  -1   5 1508.92  425.98   1 0.12870-0.32700 1.45853 0.69231 0.12870-0.53058
   3  -1   433271.04 1960.26   1-0.77549-1.17077 1.59480 0.97930 0.88134 0.30024
  -3   1  -436045.19 2017.66   1-0.98908-0.59394 1.09242 1.70754 0.15156 0.73250
  -3   1  -439307.09 2209.73   1-0.89652-0.50099 1.11135 1.72645 0.07996 0.66059
   3  -1   3 2724.76  679.24   1-0.76102-1.09565 1.60506 1.14102 0.90623 0.40300
  -3   1  -3 2778.21  566.85   1-0.96768-0.63304 1.24153 1.70557 0.32669 0.82993
   3  -1   3 2626.64  513.13   1-0.52944-0.86434 1.75037 1.28664 0.76688 0.26404
  -3   1  -3 2967.85  563.74   1-0.83471-0.49980 1.29495 1.75868 0.24562 0.74846
   3  -1   2 9214.38 1339.15   1-0.98894-1.26302 1.10424 0.79242 0.98894 0.56378
  -3   1  -215271.32 1249.30   1-0.92721-0.65321 1.38032 1.69289 0.51000 0.93536
   3  -1   213233.73 1413.29   1-0.45494-0.72922 1.80379 1.49147 0.85613 0.43109
  -3   1  -216965.37 1153.62   1-0.74369-0.46942 1.48617 1.79850 0.43750 0.86253
   3  -1   131821.47 2152.40   1-0.98707-1.20034 1.12380 0.96341 0.98707 0.63981
  -3   1  -136732.90 2377.24   1-0.67413-0.46087 1.64201 1.80241 0.67413 1.02139
   3  -1   143287.56 2360.87   1-0.66481-0.87818 1.64909 1.48797 1.04671 0.69920
  -3   1  -149253.64 2142.15   1-0.86364-0.65027 1.50197 1.66309 0.69842 1.04592
  -3   1  -142768.82 2022.11   1-0.55968-0.34630-1.65407-1.49376-0.55968-0.21262
   3  -1   140722.83 3094.14   1-0.26634-0.47972-1.55400-1.71431-0.26634-0.61340
   3  -1   144061.82 2348.22   1-0.32600-0.53964 1.86221 1.70126 0.98819 0.64095
  -3   1  -139755.34 2074.77   1-0.60899-0.39534 1.67421 1.83516 0.65902 1.00626
   3  -1   022309.54 1360.34   1-0.99085-1.14330 1.08016 1.07118 0.99085 0.72147
  -3   1   019387.04 1578.27   1-0.86413-0.71169 1.50329 1.51228 0.86413 1.13352
   3  -1   021017.82 1498.89   1-0.55731-0.71004 1.66131 1.65166 1.16549 0.89585
  -3   1   022256.51 1397.02   1-0.77309-0.62036 1.59658 1.60623 0.88555 1.15518
  -3   1   021631.73 1587.72   1-0.76100-0.60825-1.60331-1.59438-0.76100-0.49187
   3  -1   022748.69 2040.80   1-0.54103-0.69378-1.65275-1.66167-0.54103-0.81016
   3  -1   022373.43 1668.28   1-0.11615-0.26916 1.87964 1.87008 1.15206 0.88262
  -3   1   136897.14 1837.77   1-0.92792-0.83629 1.38359 1.24116 0.92792 1.11942
   3  -1  -139341.64 1790.03   1-0.38532-0.47742 1.62434 1.76616 1.29715 1.10538
  -3   1   139763.83 2090.90   1-0.92273-0.83061-1.39632-1.53878-0.92273-0.73154
   3  -1  -140196.22 2039.96   1-0.77666-0.86879-1.59267-1.45022-0.77666-0.96785
  -3   1   139751.42 2626.78   1-0.15260-0.06023 1.88293 1.74110 1.12775 1.31939
  -3   1   230997.38 1541.73   1-0.95083-0.92002 1.31643 1.02259 0.95083 1.06444
   3  -1  -232049.27 1641.62   1-0.13813-0.16960 1.48113 1.77441 1.39333 1.27944
  -3   1   230856.99 1809.27   1-0.51427-0.48281 1.65783 1.36458 1.20440 1.31831
  -3   1   232043.26 1973.34   1-0.99167-0.96018-1.06796-1.36181-0.99167-0.87842
   3  -1  -229355.39 1646.49   1-0.91802-0.94951-1.40731-1.11347-0.91802-1.03128
  -3   1   231769.66 2565.11   1 0.13363 0.16537 1.78963 1.49641 1.27425 1.38809
  -3   1   230059.34 2237.80   1-0.51040-0.47918-1.41448-1.70747-1.30110-1.18711
   3  -1  -356380.45 2198.92   1-0.99104-0.96104 0.84165 1.28691 0.99104 0.95532
  -3   1   352735.31 2694.12   1-0.95818-0.98819 1.28971 0.84445 0.95818 0.99390
   3  -1  -356098.12 2265.00   1 0.16270 0.19188 1.18837 1.63308 1.38803 1.35198
  -3   1   353530.80 2730.34   1-0.36827-0.39745 1.61759 1.17289 1.30701 1.34306
  -3   1   357596.95 2501.61   1-0.98020-1.00934-0.71891-1.16414-0.98020-0.94489
   3  -1  -352925.40 2766.83   1-0.97709-0.94795-1.19927-0.75405-0.97709-1.01241
  -3   1   354219.95 3294.45   1-0.76572-0.79516-0.91930-1.36360-1.16078-1.12460
   3  -1  -354923.13 2660.73   1-0.37590-0.34646-1.58577-1.14149-1.31610-1.35230
   3  -1  -4 9965.00  902.22   1-0.98296-0.89214 0.74421 1.34090 0.98296 1.02513
  -3   1   4 8392.27  990.89   1-0.23739-0.32720 1.54989 0.95369 1.36633 1.32449
  -3   1   4 8580.34 1200.99   1-0.45941-0.54966-0.76908-1.36464-1.24798-1.28945
  -3   1   4 8883.15 1144.28   1-0.92699-1.01694-0.40916-1.00588-0.92699-0.96979
   3  -1  -4 9551.71 1006.61   1-0.99355-0.90379-1.03127-0.43467-0.99355-0.95094
  -3   1   4 8076.53 1212.18   1-0.91166-1.00176-0.42809-1.02365-0.94366-0.98524
   3  -1  -4 9584.26  941.19   1-0.54058-0.45048-1.36914-0.77357-1.29319-1.25160
   3  -1  -5 6204.77  766.20   1-0.96986-0.81869 0.63928 1.38769 0.96986 1.09026
  -3   1   5 5909.76  834.74   1-0.95292-1.10456 1.30918 0.56109 0.95292 0.83287
  -3   1   5 5279.16  933.42   1-0.13714-0.28758 1.48038 0.73272 1.39354 1.27383
  -3   1   5 4933.93  913.10   1-0.69878-0.84971-0.30153-1.04842-1.00147-1.12074
  -3   1   5 5061.97  839.99   1-0.85842-1.00899-0.15117-0.89935-0.85842-0.97923
   3  -1  -5 5180.40  994.01   1-0.99425-0.84386-0.91509-0.16711-0.99425-0.87370
  -3   1   5 5512.06  829.30   1-0.97658-1.12733-0.01774-0.76462-0.72088-0.84026
   3  -1  -5 5837.16  864.19   1-0.63914-0.48838-1.19975-0.45287-1.25334-1.13396
   3  -1  -6 1094.76  301.90   1-0.95174-0.73992 0.52969 1.42960 0.95174 1.15014
  -3   1   6  976.85  434.73   1-0.94365-1.15611 1.33974 0.44022 0.94365 0.74571
  -3   1   6  840.70  324.45   1-0.07297-0.28405 1.42836 0.52926 1.40318 1.20562
  -3   1   6  723.82  376.61   1-0.86059-1.07219 0.13934-0.75889-0.70591-0.90299
  -3   1   6  976.93  319.01   1-0.78604-0.99724 0.06353-0.83609-0.78604-0.98486
  -3   1   6  944.38  381.97   1-0.99472-1.20614 0.30923-0.58893-0.51897-0.71613
   3  -1  -6  897.07  391.98   1-0.69415-0.48273-1.08825-0.19009-1.21994-1.02278
   3  -1  -7 9615.28 1069.98   1-0.92825-0.65577 0.41475 1.46617 0.92825 1.20466
  -3   1   7 7198.35 1079.39   1-0.04342-0.31514 1.40247 0.35191 1.40562 1.13020
  -3   1   7 6399.66 1119.70   1-0.95309-1.22537 0.52062-0.52896-0.40347-0.67835
  -3   1   7 7914.36 1008.35   1-0.71403-0.98585 0.24539-0.80566-0.71403-0.99086
  -3   1   7 8855.82 1191.73   1-0.98701-1.25908 0.57189-0.47757-0.34060-0.61555
   3  -1  -7 8312.40 1167.23   1-0.72208-0.45000-1.02591 0.02353-1.19922-0.92428
   3  -1  -8 8164.36  835.74   1-0.89906-0.56593 0.29449 1.49741 0.89906 1.25346
  -3   1   8 6217.77 1115.85   1-0.99170-1.32465 0.83940-0.36151-0.11235-0.46502
  -3   1   8 7065.99  995.91   1-0.64346-0.97592 0.40296-0.79955-0.64346-0.99830
  -3   1   8 7655.08 1229.91   1-0.96437-1.29642 0.78682-0.41472-0.18278-0.53573
   3  -1  -9 1592.54  456.93   1-0.86373-0.46995 0.16873 1.52318 0.86373 1.29614
  -3   1   9 1190.67  411.91   1-0.57432-0.96740 0.54235-0.81158-0.57432-1.00717
  -3   1   9 1447.68  480.64   1-0.93165-1.32433 0.97020-0.38272-0.03839-0.46913
   3  -2   819142.74 2070.76   1-0.63992-1.33885 1.65490 0.58675 1.07729 0.28354
   3  -2   816989.72 1884.63   1 0.11539-0.58331 1.44787 0.38035 0.11539-0.67904
   3  -2   817611.13 1777.65   1-0.50395-1.20307 1.77044 0.70291 0.79860 0.00561
   3  -2   727646.28 2350.87   1-0.65956-1.29785 1.65048 0.73380 1.05333 0.33746
   3  -2   727250.53 2251.77   1 0.11985-0.51822 1.45147 0.53539 0.11985-0.59657
   3  -2   727293.39 2281.86   1-0.50852-1.14700 1.76698 0.85083 0.79300 0.07780
   3  -2   616564.01 1746.50   1-0.66809-1.24574 1.64817 0.88295 1.04252 0.40451
  -3   2  -614687.43 1327.46   1-0.99392-0.41636 1.00987 1.77436 0.06152 0.69919
   3  -2   615779.27 1750.20   1 0.13880-0.43864 1.46646 0.70181 0.13880-0.49961
   3  -2   615770.11 1659.03   1-0.50148-1.07933 1.77228 1.00752 0.80160 0.16420
   3  -2   5 2663.36  558.71   1-0.66387-1.18088 1.64933 1.03558 1.04789 0.48775
  -3   2  -5 2502.37  463.33   1-0.97899-0.46210 1.17846 1.79160 0.25039 0.81025
  -3   2  -5 2420.88  461.90   1-0.36210 0.15471 0.90235 1.51555-0.36210 0.19829
   3  -2   5 2481.60  566.86   1-0.47891-0.99613 1.78832 1.17494 0.82854 0.26894
  -3   2  -5 2690.41  563.51   1-0.87595-0.35873 1.17948 1.79286 0.13972 0.69932
   3  -2   4197485.0 7753.08   1-0.64371-1.10010 1.65413 1.19185 1.07275 0.59048
  -3   2  -4169499.1 7237.33   1-0.94369-0.48731 1.33357 1.79587 0.44545 0.92773
  -3   2  -4205620.9 7423.66   1-0.22674 0.22944 1.09029 1.55204-0.22674 0.25565
  -3   2  -4204913.8 7691.04   1-0.24274 0.21359-1.53959-1.07819-0.24274 0.23922
  -3   2  -4227211.6 8134.65   1-0.80405-0.34746 1.36743 1.82939 0.31556 0.79736
   3  -2   3 2569.33  631.21   1-0.60231-0.99806 1.66012 1.34928 1.11982 0.71540
  -3   2  -3 2752.39  532.69   1-0.88413-0.48838 1.46995 1.78078 0.64512 1.04953
  -3   2  -3 2802.65  490.86   1-0.05534 0.34021 1.28956 1.59986-0.05534 0.34903
  -3   2  -3 2269.35  529.87   1-0.34457 0.05113-1.59559-1.28557-0.34457 0.05945
   3  -2   3 2075.19  537.92   1-0.35828-0.75424 1.85129 1.54069 0.95757 0.55356
  -3   2  -3 2790.44  555.39   1-0.70143-0.30547 1.55486 1.86545 0.51338 0.91738
   3  -2   219033.72 2095.81   1-0.82496-1.15962 0.04687-0.11199 0.82496 0.49828
  -3   2  -215619.09 1708.00   1-0.86321-0.52808 1.50458 1.66300 0.86321 1.18935
  -3   2  -223427.90 1510.03   1-0.79710-0.46199 1.57728 1.73665 0.84191 1.16846
  -3   2  -226124.87 1691.55   1 0.15934 0.49428 1.48213 1.64102 0.15934 0.48572
  -3   2  -223439.13 1612.90   1-0.49002-0.15494-1.64519-1.48653-0.49002-0.16392
   3  -2   222658.61 1719.17   1-0.23631-0.57163 1.88062 1.72140 1.06544 0.73923
  -3   2  -224366.64 1583.77   1-0.55706-0.22174 1.72632 1.88555 0.73101 1.05723
   3  -2   1  147.26  160.65   1-0.93021-1.20422 0.42360 0.41626 0.93021 0.68154
  -3   2  -1   86.25   91.24   1-0.97221-0.69789 1.22682 1.23383 0.97221 1.22046
   3  -2   1   68.85  146.99   1-0.42198-0.69646 1.63710 1.62919 1.27412 1.02544
  -3   2  -1   71.24  106.32   1-0.68163-0.40716 1.64400 1.65192 1.02485 1.27353
  -3   2  -1   62.53   90.94   1-0.67177-0.39732-1.64266-1.63540-0.67177-0.42361
   3  -2   1   64.12  119.43   1-0.41000-0.68445-1.62264-1.62991-0.41000-0.65816
   3  -2   1   55.53   85.11   1-0.05426-0.32895 1.86827 1.86044 1.18952 0.94111
  -3   2  -1  138.93  161.87   1-0.36194-0.08725 1.84990 1.85773 0.95400 1.20242
   3  -2   026376.23 1716.24   1-0.95323-1.16656 0.53781 0.68196 0.95323 0.78255
  -3   2   024005.59 1649.68   1-0.98957-0.77607 1.09689 0.95247 0.98957 1.15992
   3  -2   026234.35 1591.21   1-0.26450-0.47834 1.56613 1.70967 1.35633 1.18552
  -3   2   025912.98 1618.54   1-0.54222-0.32839 1.66058 1.51704 1.17964 1.35045
  -3   2   027958.42 1693.42   1-0.84943-0.63561-1.52274-1.66688-0.84943-0.67921
   3  -2   028766.19 1872.28   1-0.65638-0.87020-1.64641-1.50230-0.65638-0.82661
  -3   2   1  130.03  112.60   1-0.99271-0.84002 1.04986 0.75404 0.99271 1.08519
   3  -2  -1  118.14  112.68   1-0.06009-0.21329 1.41722 1.71224 1.40439 1.31145
  -3   2   1  124.77  119.66   1-0.96414-0.81095-1.26526-1.56077-0.96414-0.87185
   3  -2  -1  115.89  158.91   1-0.84022-0.99341-1.53386-1.23835-0.84022-0.93251
   3  -2  -2 1647.27  392.39   1-0.95317-1.04521 0.53748 0.98465 0.95317 0.93850
  -3   2   2 1672.19  426.37   1-0.99278-0.90091 1.04848 0.60124 0.99278 1.00737
  -3   2   2 1807.52  471.72   1-0.24571-0.15314 1.55498 1.10852 1.36337 1.37846
  -3   2   2 1846.92  447.53   1-0.99466-0.90209-0.93495-1.38182-0.99466-0.98030
   3  -2  -2 1600.56  457.38   1-0.94051-1.03307-1.34923-0.90233-0.94051-0.95486
  -3   2   2 1675.16  529.85   1-0.68346-0.59122-1.11102-1.55722-1.22715-1.21200
   3  -2  -2 1775.31  479.88   1-0.34770-0.43994-1.61596-1.16977-1.31547-1.33064
   3  -2  -3   31.73   73.04   1-0.94391-0.97529 0.48890 1.08758 0.94391 1.00724
  -3   2   3   27.88  114.74   1-0.99131-0.96025 1.07362 0.47496 0.99131 0.92801
  -3   2   3   56.73  113.50   1-0.12231-0.09038 1.46886 0.87095 1.39628 1.33351
  -3   2   3  119.43  150.72   1-0.40551-0.37402-0.85625-1.45376-1.28479-1.34732
  -3   2   3  264.37  189.32   1-0.96539-0.93359-0.60964-1.20795-0.96539-1.02907
   3  -2  -3   34.99  111.40   1-0.98151-1.01345-1.17009-0.57182-0.98151-0.91793
  -3   2   3   47.71  100.28   1-0.84318-0.81160-0.69317-1.29066-1.06830-1.13092
   3  -2  -3   54.57  107.50   1-0.50535-0.53693-1.42180-0.82432-1.30225-1.23962
   3  -2  -432070.52 1969.34   1-0.93008-0.90080 0.42298 1.17317 0.93008 1.07141
  -3   2   431596.30 2107.85   1-0.02966-0.05836 1.39001 0.64062 1.40634 1.26568
  -3   2   430657.67 2058.97   1-0.60803-0.63721-0.49689-1.24573-1.11362-1.25396
  -3   2   428636.23 2169.26   1-0.90702-0.93586-0.32550-1.07527-0.90702-1.04872
  -3   2   428030.31 2109.24   1-0.93593-0.96501-0.30623-1.05502-0.88113-1.02154
   3  -2  -432218.74 2191.65   1-0.60746-0.57838-1.25805-0.50929-1.26868-1.12829
   3  -2  -510197.73  993.95   1-0.91172-0.82178 0.34436 1.24605 0.91172 1.13106
  -3   2   510968.22 1327.37   1-0.98213-1.07271 1.16554 0.26404 0.98213 0.76306
  -3   2   5 9486.58 1229.04   1 0.03098-0.05836 1.33199 0.43112 1.40629 1.18777
  -3   2   5 9020.06 1208.73   1-0.76616-0.85601-0.13646-1.03666-0.89752-1.11566
  -3   2   5 9982.15 1045.52   1-0.83778-0.92724-0.08565-0.98685-0.83778-1.05747
  -3   2   5 9842.88 1203.88   1-0.98079-1.07053 0.02669-0.87339-0.69471-0.91290
   3  -2  -510153.03 1220.12   1-0.66916-0.57941-1.14063-0.24055-1.23625-1.01805
   3  -2  -6 2603.98  530.10   1-0.88866-0.73807 0.25563 1.30886 0.88866 1.18601
  -3   2   6 2348.35  594.38   1 0.06245-0.08752 1.29985 0.24755 1.40418 1.10781
  -3   2   6 2176.52  577.33   1-0.87848-1.02901 0.20054-0.85099-0.66037-0.95632
  -3   2   6 2414.91  517.05   1-0.76577-0.91586 0.11733-0.93533-0.76577-1.06349
  -3   2   6 2364.32  493.15   1-0.99470-1.14510 0.30753-0.74383-0.52008-0.81605
   3  -2  -6 2141.65  550.06   1-0.70384-0.55344-1.06710-0.01573-1.21307-0.91709
   3  -2  -7 2344.90  469.23   1-0.86060-0.64936 0.15836 1.36309 0.86060 1.23596
  -3   2   7 2086.20  543.35   1 0.06850-0.14211 1.29354 0.08975 1.40363 1.02937
  -3   2   7 2217.31  552.67   1-0.95007-1.16127 0.50417-0.69870-0.41747-0.79122
  -3   2   7 2434.85  441.18   1-0.69400-0.90473 0.29191-0.91219-0.69400-1.06973
  -3   2   7 2222.07  551.54   1-0.98872-1.19979 0.54571-0.65694-0.35907-0.73283
   3  -2  -810467.77 1128.83   1-0.82715-0.55525 0.05339 1.40963 0.82715 1.28050
  -3   2   8 8072.99 1198.56   1-0.98706-1.25892 0.77331-0.58091-0.17603-0.62758
  -3   2   8 8483.39 1008.75   1-0.62330-0.89465 0.44498-0.91055-0.62330-1.07703
  -3   2   8 9803.38 1196.91   1-0.96946-1.24046 0.74944-0.60522-0.21106-0.66283
   3  -3   9 1157.10  545.49   1-0.50473-1.32539 1.65652 0.59011 1.21246 0.43967
   3  -3   9 1305.60  427.17   1 0.14377-0.67665 1.47030 0.40439 0.14377-0.62977
   3  -3   9 1121.85  507.80   1-0.41250-1.23330 1.82749 0.76168 0.90254 0.13057
   3  -3   8  482.29  294.04   1-0.52687-1.28690 1.65930 0.74436 1.19347 0.49855
   3  -3   8  423.95  261.13   1 0.14527-0.61453 1.47146 0.55698 0.14527-0.55027
   3  -3   8  397.41  255.04   1-0.41525-1.17543 1.82609 0.91167 0.89962 0.20545
   3  -3   732651.77 2977.26   1-0.53560-1.23500 1.66009 0.89661 1.18567 0.56861
  -3   3  -740277.82 2896.51   1-0.99143-0.29212 1.06114 1.82365 0.11693 0.73352
   3  -3   735897.03 3003.76   1 0.15960-0.53957 1.48233 0.71930 0.15960-0.45792
   3  -3   735701.32 3098.41   1-0.40565-1.10519 1.83089 1.06786 0.90975 0.29338
   3  -3   6  545.48  282.73   1-0.52955-1.16831 1.65957 1.04755 1.19110 0.65191
  -3   3  -6  438.01  301.99   1-0.96845-0.32969 1.23785 1.84986 0.32213 0.86132
  -3   3  -6  572.44  264.02   1-0.19046 0.44818-1.50474-0.89342-0.19046 0.34850
   3  -3   6  452.97  305.76   1-0.38013-1.01903 1.84254 1.23090 0.93594 0.39737
   3  -3   5 9708.97 1238.86   1-0.50604-1.08415 1.65670 1.19615 1.21136 0.75004
  -3   3  -511625.09 1029.53   1-0.92100-0.34288 1.39573 1.85626 0.53205 0.99336
  -3   3  -511180.88 1155.29   1-0.28129 0.29662 1.01799 1.47813-0.28129 0.18021
  -3   3  -512503.15 1073.41   1-0.24477 0.33326-1.54087-1.08114-0.24477 0.21622
[truncated: 332,375 more chars]
